# Supplementary material for: Design of organic structure directing agents for polymorph A zeolite beta
Source: Royal Society of Chemistry journal article supplement (doi:10.1039/c8ta11913a), 2019-01-01
Supplement: c8ta11913a1.sdf [file c8ta11913a1.sdf]

BEA_38/Syn008039/Syn008039.car
 OpenBabel12061810373D

 48 52  0  0  1  0  0  0  0  0999 V2000
    3.4637    0.4132    0.0324 N   0  0  0  0  0  0  0  0  0  0  0  0
    4.4885   -0.3500   -0.0019 C   0  0  0  0  0  0  0  0  0  0  0  0
    2.2913   -0.2928    0.0502 N   0  0  1  0  0  0  0  0  0  0  0  0
    4.1388   -1.6570   -0.0177 C   0  0  0  0  0  0  0  0  0  0  0  0
    2.7692   -1.5379    0.0039 C   0  0  1  0  0  0  0  0  0  0  0  0
    5.5630    0.4165   -0.0113 N   0  0  0  0  0  0  0  0  0  0  0  0
    3.7625    1.6618    0.0447 C   0  0  0  0  0  0  0  0  0  0  0  0
    5.1294    1.6578    0.0165 C   0  0  0  0  0  0  0  0  0  0  0  0
    1.8939   -2.7584    0.0015 C   0  0  0  0  0  0  0  0  0  0  0  0
    4.7639   -2.5386   -0.0455 H   0  0  0  0  0  0  0  0  0  0  0  0
    3.0482    2.4722    0.0692 H   0  0  0  0  0  0  0  0  0  0  0  0
    5.8119    2.4972    0.0143 H   0  0  0  0  0  0  0  0  0  0  0  0
    0.8849   -2.5358   -0.3457 H   0  0  0  0  0  0  0  0  0  0  0  0
    2.3010   -3.5199   -0.6712 H   0  0  0  0  0  0  0  0  0  0  0  0
    1.8328   -3.1787    1.0099 H   0  0  0  0  0  0  0  0  0  0  0  0
    6.9520   -0.0317   -0.0477 C   0  0  0  0  0  0  0  0  0  0  0  0
    7.6146    0.8400   -0.0407 H   0  0  0  0  0  0  0  0  0  0  0  0
    7.1038   -0.6107   -0.9644 H   0  0  0  0  0  0  0  0  0  0  0  0
    7.1382   -0.6508    0.8359 H   0  0  0  0  0  0  0  0  0  0  0  0
   -3.4637   -0.4132   -0.0324 N   0  0  0  0  0  0  0  0  0  0  0  0
   -4.4885    0.3500    0.0019 C   0  0  0  0  0  0  0  0  0  0  0  0
   -2.2913    0.2928   -0.0502 N   0  0  2  0  0  0  0  0  0  0  0  0
   -4.1388    1.6570    0.0177 C   0  0  0  0  0  0  0  0  0  0  0  0
   -2.7692    1.5379   -0.0039 C   0  0  2  0  0  0  0  0  0  0  0  0
   -5.5630   -0.4165    0.0113 N   0  0  0  0  0  0  0  0  0  0  0  0
   -3.7625   -1.6618   -0.0447 C   0  0  0  0  0  0  0  0  0  0  0  0
   -5.1294   -1.6578   -0.0165 C   0  0  0  0  0  0  0  0  0  0  0  0
   -1.8939    2.7584   -0.0015 C   0  0  0  0  0  0  0  0  0  0  0  0
   -4.7639    2.5386    0.0455 H   0  0  0  0  0  0  0  0  0  0  0  0
   -3.0482   -2.4722   -0.0692 H   0  0  0  0  0  0  0  0  0  0  0  0
   -5.8119   -2.4972   -0.0143 H   0  0  0  0  0  0  0  0  0  0  0  0
   -0.8849    2.5358    0.3457 H   0  0  0  0  0  0  0  0  0  0  0  0
   -1.8328    3.1787   -1.0099 H   0  0  0  0  0  0  0  0  0  0  0  0
   -2.3010    3.5199    0.6712 H   0  0  0  0  0  0  0  0  0  0  0  0
   -6.9520    0.0317    0.0477 C   0  0  0  0  0  0  0  0  0  0  0  0
   -7.1038    0.6107    0.9644 H   0  0  0  0  0  0  0  0  0  0  0  0
   -7.1382    0.6508   -0.8359 H   0  0  0  0  0  0  0  0  0  0  0  0
   -7.6146   -0.8400    0.0407 H   0  0  0  0  0  0  0  0  0  0  0  0
   -0.9979   -0.4179   -0.1108 C   0  0  2  0  0  0  0  0  0  0  0  0
   -1.1574   -1.4836   -0.2908 H   0  0  0  0  0  0  0  0  0  0  0  0
   -0.0541   -0.1597    1.0799 C   0  0  0  0  0  0  0  0  0  0  0  0
   -0.4326    0.5788    1.7938 H   0  0  0  0  0  0  0  0  0  0  0  0
    0.2555   -1.0726    1.5969 H   0  0  0  0  0  0  0  0  0  0  0  0
    0.9979    0.4179    0.1108 C   0  0  2  0  0  0  0  0  0  0  0  0
    1.1574    1.4836    0.2908 H   0  0  0  0  0  0  0  0  0  0  0  0
    0.0541    0.1597   -1.0799 C   0  0  0  0  0  0  0  0  0  0  0  0
    0.4326   -0.5788   -1.7938 H   0  0  0  0  0  0  0  0  0  0  0  0
   -0.2555    1.0726   -1.5969 H   0  0  0  0  0  0  0  0  0  0  0  0
  1  7  1  0  0  0  0
  2  1  1  0  0  0  0
  3  1  1  1  0  0  0
  3 44  1  0  0  0  0
  4  2  2  0  0  0  0
  4  5  1  0  0  0  0
  5  9  1  1  0  0  0
  5  3  1  0  0  0  0
  6  2  1  0  0  0  0
  6  8  1  0  0  0  0
  7 11  1  0  0  0  0
  8  7  2  0  0  0  0
  9 15  1  0  0  0  0
 10  4  1  0  0  0  0
 12  8  1  0  0  0  0
 13  9  1  0  0  0  0
 14  9  1  0  0  0  0
 16 17  1  0  0  0  0
 16  6  1  0  0  0  0
 16 19  1  0  0  0  0
 18 16  1  0  0  0  0
 20 21  1  0  0  0  0
 21 25  1  0  0  0  0
 21 23  2  0  0  0  0
 22 20  1  6  0  0  0
 22 24  1  0  0  0  0
 23 29  1  0  0  0  0
 24 28  1  6  0  0  0
 24 23  1  0  0  0  0
 25 35  1  0  0  0  0
 26 20  1  0  0  0  0
 26 27  2  0  0  0  0
 27 31  1  0  0  0  0
 27 25  1  0  0  0  0
 28 32  1  0  0  0  0
 28 34  1  0  0  0  0
 30 26  1  0  0  0  0
 33 28  1  0  0  0  0
 35 36  1  0  0  0  0
 37 35  1  0  0  0  0
 38 35  1  0  0  0  0
 39 40  1  6  0  0  0
 39 22  1  0  0  0  0
 39 41  1  0  0  0  0
 41 43  1  0  0  0  0
 41 42  1  0  0  0  0
 44 45  1  1  0  0  0
 44 41  1  0  0  0  0
 46 39  1  0  0  0  0
 46 44  1  0  0  0  0
 47 46  1  0  0  0  0
 48 46  1  0  0  0  0
M  END
>  <energy_and_gap>
-15.055 41.097

$$$$
BEA_38/Syn001935/Syn001935.car
 OpenBabel12061810373D

 49 52  0  0  1  0  0  0  0  0999 V2000
    1.5485    2.2932    2.1188 N   0  0  0  0  0  0  0  0  0  0  0  0
    2.0202    1.3021    1.2831 C   0  0  1  0  0  0  0  0  0  0  0  0
    1.5246    0.0203    1.3285 C   0  0  0  0  0  0  0  0  0  0  0  0
    2.2657   -0.5412    0.3389 C   0  0  0  0  0  0  0  0  0  0  0  0
    2.4317   -1.6904   -0.2949 N   0  0  0  0  0  0  0  0  0  0  0  0
    3.3679   -1.4781   -1.1988 C   0  0  0  0  0  0  0  0  0  0  0  0
    3.7857   -0.1771   -1.1288 C   0  0  0  0  0  0  0  0  0  0  0  0
    3.0705    0.3049   -0.1815 N   0  0  0  0  0  0  0  0  0  0  0  0
    2.9635    1.5354    0.3866 N   0  0  0  0  0  0  0  0  0  0  0  0
    0.8294    2.1088    2.8133 H   0  0  0  0  0  0  0  0  0  0  0  0
    1.9214    3.2353    2.0670 H   0  0  0  0  0  0  0  0  0  0  0  0
    0.7610   -0.4178    1.9559 H   0  0  0  0  0  0  0  0  0  0  0  0
    3.6991   -2.2627   -1.8662 H   0  0  0  0  0  0  0  0  0  0  0  0
    4.5195    0.3842   -1.6909 H   0  0  0  0  0  0  0  0  0  0  0  0
    3.7917    2.6475   -0.0754 C   0  0  0  0  0  0  0  0  0  0  0  0
    3.5573    2.8368   -1.1273 H   0  0  0  0  0  0  0  0  0  0  0  0
    3.5654    3.5334    0.5236 H   0  0  0  0  0  0  0  0  0  0  0  0
    4.8428    2.3705    0.0506 H   0  0  0  0  0  0  0  0  0  0  0  0
   -0.6806    2.7696   -1.5151 N   0  0  0  0  0  0  0  0  0  0  0  0
   -1.4869    1.7670   -1.0166 C   0  0  1  0  0  0  0  0  0  0  0  0
   -1.1952    0.4386   -1.2161 C   0  0  0  0  0  0  0  0  0  0  0  0
   -2.2291   -0.1223   -0.5377 C   0  0  0  0  0  0  0  0  0  0  0  0
   -2.7152   -1.3055   -0.1995 N   0  0  0  0  0  0  0  0  0  0  0  0
   -3.8027   -1.0658    0.5066 C   0  0  0  0  0  0  0  0  0  0  0  0
   -3.9899    0.2852    0.6156 C   0  0  0  0  0  0  0  0  0  0  0  0
   -3.0000    0.7674   -0.0392 N   0  0  0  0  0  0  0  0  0  0  0  0
   -2.5741    2.0297   -0.3112 N   0  0  0  0  0  0  0  0  0  0  0  0
    0.1453    2.5642   -2.0708 H   0  0  0  0  0  0  0  0  0  0  0  0
   -0.9061    3.7450   -1.3505 H   0  0  0  0  0  0  0  0  0  0  0  0
   -0.3784   -0.0312   -1.7464 H   0  0  0  0  0  0  0  0  0  0  0  0
   -4.4021   -1.8694    0.9134 H   0  0  0  0  0  0  0  0  0  0  0  0
   -4.7466    0.8788    1.1101 H   0  0  0  0  0  0  0  0  0  0  0  0
   -3.3137    3.1910    0.1794 C   0  0  0  0  0  0  0  0  0  0  0  0
   -3.3218    3.1567    1.2730 H   0  0  0  0  0  0  0  0  0  0  0  0
   -2.8151    4.1016   -0.1628 H   0  0  0  0  0  0  0  0  0  0  0  0
   -4.3300    3.1480   -0.2238 H   0  0  0  0  0  0  0  0  0  0  0  0
   -0.9150   -3.0534    1.6551 C   0  0  0  0  0  0  0  0  0  0  0  0
    0.0502   -3.2932    2.1033 H   0  0  0  0  0  0  0  0  0  0  0  0
   -1.5898   -3.8824    1.8876 H   0  0  0  0  0  0  0  0  0  0  0  0
   -1.2929   -2.1553    2.1516 H   0  0  0  0  0  0  0  0  0  0  0  0
   -0.8434   -2.8447    0.1685 C   0  0  0  0  0  0  0  0  0  0  0  0
   -2.1619   -2.6230   -0.5224 C   0  0  0  0  0  0  0  0  0  0  0  0
   -2.0686   -2.6666   -1.6137 H   0  0  0  0  0  0  0  0  0  0  0  0
   -2.8886   -3.3902   -0.2314 H   0  0  0  0  0  0  0  0  0  0  0  0
    0.3036   -2.8295   -0.5659 C   0  0  0  0  0  0  0  0  0  0  0  0
    0.2183   -2.6852   -1.6380 H   0  0  0  0  0  0  0  0  0  0  0  0
    1.7118   -2.9444   -0.0677 C   0  0  0  0  0  0  0  0  0  0  0  0
    1.7863   -3.1680    0.9995 H   0  0  0  0  0  0  0  0  0  0  0  0
    2.2329   -3.7432   -0.6062 H   0  0  0  0  0  0  0  0  0  0  0  0
  1 10  1  0  0  0  0
  2  3  1  0  0  0  0
  2  1  1  6  0  0  0
  3 12  1  0  0  0  0
  4  3  2  0  0  0  0
  5 47  1  0  0  0  0
  5  4  1  0  0  0  0
  6  7  2  0  0  0  0
  6  5  1  0  0  0  0
  7  8  1  0  0  0  0
  8  4  1  0  0  0  0
  8  9  1  0  0  0  0
  9  2  1  0  0  0  0
 11  1  1  0  0  0  0
 13  6  1  0  0  0  0
 14  7  1  0  0  0  0
 15 18  1  0  0  0  0
 15  9  1  0  0  0  0
 15 17  1  0  0  0  0
 16 15  1  0  0  0  0
 19 29  1  0  0  0  0
 20 19  1  1  0  0  0
 20 27  1  0  0  0  0
 21 20  1  0  0  0  0
 21 22  2  0  0  0  0
 22 23  1  0  0  0  0
 22 26  1  0  0  0  0
 23 24  1  0  0  0  0
 24 25  2  0  0  0  0
 24 31  1  0  0  0  0
 25 32  1  0  0  0  0
 26 25  1  0  0  0  0
 27 26  1  0  0  0  0
 27 33  1  0  0  0  0
 28 19  1  0  0  0  0
 30 21  1  0  0  0  0
 33 34  1  0  0  0  0
 35 33  1  0  0  0  0
 36 33  1  0  0  0  0
 37 39  1  0  0  0  0
 37 38  1  0  0  0  0
 37 40  1  0  0  0  0
 41 37  1  0  0  0  0
 42 44  1  0  0  0  0
 42 23  1  0  0  0  0
 42 41  1  0  0  0  0
 43 42  1  0  0  0  0
 45 47  1  0  0  0  0
 45 41  2  0  0  0  0
 46 45  1  0  0  0  0
 47 48  1  0  0  0  0
 49 47  1  0  0  0  0
M  END
>  <energy_and_gap>
-15.550 19.161

$$$$
BEA_38/Syn005186/Syn005186.car
 OpenBabel12061810373D

 53 56  0  0  1  0  0  0  0  0999 V2000
    2.8665   -2.8423   -0.3434 N   0  0  0  0  0  0  0  0  0  0  0  0
    3.0510   -1.5042   -0.0343 C   0  0  1  0  0  0  0  0  0  0  0  0
    4.2416   -0.9674    0.1665 N   0  0  0  0  0  0  0  0  0  0  0  0
    4.0604    0.3509    0.4272 C   0  0  0  0  0  0  0  0  0  0  0  0
    4.9938    1.3420    0.7222 C   0  0  0  0  0  0  0  0  0  0  0  0
    4.4699    2.6324    0.9396 C   0  0  0  0  0  0  0  0  0  0  0  0
    3.0880    2.9054    0.8422 C   0  0  0  0  0  0  0  0  0  0  0  0
    2.1401    1.8967    0.5244 C   0  0  0  0  0  0  0  0  0  0  0  0
    0.7826    2.2489    0.3777 N   0  0  0  0  0  0  0  0  0  0  0  0
    2.6569    0.6015    0.3440 C   0  0  0  0  0  0  0  0  0  0  0  0
    2.0739   -0.6127    0.0911 N   0  0  0  0  0  0  0  0  0  0  0  0
    1.9593   -3.2093   -0.6091 H   0  0  0  0  0  0  0  0  0  0  0  0
    3.6474   -3.4899   -0.3578 H   0  0  0  0  0  0  0  0  0  0  0  0
    6.0594    1.1527    0.7907 H   0  0  0  0  0  0  0  0  0  0  0  0
    5.1508    3.4427    1.1777 H   0  0  0  0  0  0  0  0  0  0  0  0
    2.7575    3.9276    1.0016 H   0  0  0  0  0  0  0  0  0  0  0  0
    0.1390    1.6608   -0.1371 H   0  0  0  0  0  0  0  0  0  0  0  0
    0.4571    3.1650    0.6744 H   0  0  0  0  0  0  0  0  0  0  0  0
    5.5225   -1.6808    0.1153 C   0  0  0  0  0  0  0  0  0  0  0  0
    5.6251   -2.1388   -0.8739 H   0  0  0  0  0  0  0  0  0  0  0  0
    5.5230   -2.4456    0.8988 H   0  0  0  0  0  0  0  0  0  0  0  0
    6.3521   -0.9889    0.2798 H   0  0  0  0  0  0  0  0  0  0  0  0
   -2.2855   -3.0606    0.4982 N   0  0  0  0  0  0  0  0  0  0  0  0
   -2.7305   -1.7589    0.3269 C   0  0  1  0  0  0  0  0  0  0  0  0
   -3.6225   -1.1989    1.1240 N   0  0  0  0  0  0  0  0  0  0  0  0
   -3.8211    0.0708    0.6944 C   0  0  0  0  0  0  0  0  0  0  0  0
   -4.6668    1.0579    1.1952 C   0  0  0  0  0  0  0  0  0  0  0  0
   -4.6419    2.2900    0.5144 C   0  0  0  0  0  0  0  0  0  0  0  0
   -3.8057    2.5099   -0.6003 C   0  0  0  0  0  0  0  0  0  0  0  0
   -2.9376    1.5061   -1.1073 C   0  0  0  0  0  0  0  0  0  0  0  0
   -2.1161    1.8175   -2.2111 N   0  0  0  0  0  0  0  0  0  0  0  0
   -2.9686    0.2678   -0.4365 C   0  0  0  0  0  0  0  0  0  0  0  0
   -2.3158   -0.9263   -0.6245 N   0  0  0  0  0  0  0  0  0  0  0  0
   -2.6770   -3.6564    1.2202 H   0  0  0  0  0  0  0  0  0  0  0  0
   -1.5475   -3.4608   -0.0700 H   0  0  0  0  0  0  0  0  0  0  0  0
   -5.3143    0.9074    2.0520 H   0  0  0  0  0  0  0  0  0  0  0  0
   -5.2825    3.0948    0.8593 H   0  0  0  0  0  0  0  0  0  0  0  0
   -3.8346    3.4881   -1.0712 H   0  0  0  0  0  0  0  0  0  0  0  0
   -2.2163    2.7118   -2.6840 H   0  0  0  0  0  0  0  0  0  0  0  0
   -1.3807    1.2023   -2.5319 H   0  0  0  0  0  0  0  0  0  0  0  0
   -4.2744   -1.8457    2.2687 C   0  0  0  0  0  0  0  0  0  0  0  0
   -4.8404   -2.7083    1.9019 H   0  0  0  0  0  0  0  0  0  0  0  0
   -3.5001   -2.1617    2.9754 H   0  0  0  0  0  0  0  0  0  0  0  0
   -4.9547   -1.1501    2.7659 H   0  0  0  0  0  0  0  0  0  0  0  0
   -1.3554   -1.2879   -1.6832 C   0  0  0  0  0  0  0  0  0  0  0  0
   -1.7419   -0.8723   -2.6186 H   0  0  0  0  0  0  0  0  0  0  0  0
   -1.3772   -2.3707   -1.8319 H   0  0  0  0  0  0  0  0  0  0  0  0
    0.0596   -0.8426   -1.3858 C   0  0  2  0  0  0  0  0  0  0  0  0
    0.8240   -0.4663   -2.3466 N   0  0  0  0  0  0  0  0  0  0  0  0
    0.3546   -0.5041   -3.2600 H   0  0  0  0  0  0  0  0  0  0  0  0
    0.6391   -0.9458    0.0051 C   0  0  0  0  0  0  0  0  0  0  0  0
    0.1073   -0.2986    0.7068 H   0  0  0  0  0  0  0  0  0  0  0  0
    0.5059   -1.9590    0.3960 H   0  0  0  0  0  0  0  0  0  0  0  0
  2  1  1  6  0  0  0
  2 11  1  0  0  0  0
  2  3  1  0  0  0  0
  3  4  1  0  0  0  0
  4  5  2  0  0  0  0
  5 14  1  0  0  0  0
  5  6  1  0  0  0  0
  6 15  1  0  0  0  0
  7  6  2  0  0  0  0
  7 16  1  0  0  0  0
  8  7  1  0  0  0  0
  9  8  1  0  0  0  0
  9 18  1  0  0  0  0
 10  4  1  0  0  0  0
 10  8  2  0  0  0  0
 11 10  1  0  0  0  0
 12  1  1  0  0  0  0
 13  1  1  0  0  0  0
 17  9  1  0  0  0  0
 19  3  1  0  0  0  0
 19 22  1  0  0  0  0
 19 21  1  0  0  0  0
 20 19  1  0  0  0  0
 23 34  1  0  0  0  0
 24 23  1  1  0  0  0
 24 25  1  0  0  0  0
 25 41  1  0  0  0  0
 26 25  1  0  0  0  0
 26 27  2  0  0  0  0
 27 36  1  0  0  0  0
 28 37  1  0  0  0  0
 28 27  1  0  0  0  0
 29 28  2  0  0  0  0
 30 29  1  0  0  0  0
 30 32  2  0  0  0  0
 31 30  1  0  0  0  0
 32 26  1  0  0  0  0
 33 32  1  0  0  0  0
 33 24  1  0  0  0  0
 35 23  1  0  0  0  0
 38 29  1  0  0  0  0
 39 31  1  0  0  0  0
 40 31  1  0  0  0  0
 41 44  1  0  0  0  0
 41 43  1  0  0  0  0
 42 41  1  0  0  0  0
 45 48  1  0  0  0  0
 45 33  1  0  0  0  0
 46 45  1  0  0  0  0
 47 45  1  0  0  0  0
 48 49  1  6  0  0  0
 48 51  1  0  0  0  0
 50 49  1  0  0  0  0
 51 11  1  0  0  0  0
 51 53  1  0  0  0  0
 51 52  1  0  0  0  0
M  RAD  2  48   2  49   2
M  END
>  <energy_and_gap>
-15.126  4.936

$$$$
BEA_38/Syn007870/Syn007870.car
 OpenBabel12061810373D

 54 58  0  0  1  0  0  0  0  0999 V2000
    4.1779   -3.5960    0.0000 N   0  0  0  0  0  0  0  0  0  0  0  0
    4.2180   -2.1859   -0.0000 C   0  0  0  0  0  0  0  0  0  0  0  0
    5.4664   -1.5220   -0.0000 C   0  0  0  0  0  0  0  0  0  0  0  0
    5.5387   -0.1064   -0.0000 C   0  0  0  0  0  0  0  0  0  0  0  0
    6.8018    0.5217   -0.0000 N   0  0  0  0  0  0  0  0  0  0  0  0
    4.3200    0.5966   -0.0000 C   0  0  0  0  0  0  0  0  0  0  0  0
    4.0657    1.8751   -0.0000 N   0  0  0  0  0  0  0  0  0  0  0  0
    2.7612    1.9970   -0.0000 C   0  0  0  0  0  0  0  0  0  0  0  0
    2.1582    0.8326   -0.0000 N   0  0  0  0  0  0  0  0  0  0  0  0
    3.1050   -0.0620   -0.0000 C   0  0  0  0  0  0  0  0  0  0  0  0
    3.0070   -1.4555    0.0000 C   0  0  0  0  0  0  0  0  0  0  0  0
    3.2905   -4.0918   -0.0000 H   0  0  0  0  0  0  0  0  0  0  0  0
    5.0375   -4.1391    0.0000 H   0  0  0  0  0  0  0  0  0  0  0  0
    6.3836   -2.1053   -0.0000 H   0  0  0  0  0  0  0  0  0  0  0  0
    7.6521   -0.0351   -0.0000 H   0  0  0  0  0  0  0  0  0  0  0  0
    6.8941    1.5302   -0.0000 H   0  0  0  0  0  0  0  0  0  0  0  0
    2.2446    2.9503   -0.0000 H   0  0  0  0  0  0  0  0  0  0  0  0
    4.8724    3.0981   -0.0000 C   0  0  0  0  0  0  0  0  0  0  0  0
    5.4926    3.0994    0.9020 H   0  0  0  0  0  0  0  0  0  0  0  0
    5.4926    3.0994   -0.9020 H   0  0  0  0  0  0  0  0  0  0  0  0
    4.2317    3.9868   -0.0000 H   0  0  0  0  0  0  0  0  0  0  0  0
    2.0494   -1.9633    0.0000 H   0  0  0  0  0  0  0  0  0  0  0  0
   -4.1779    3.5960    0.0000 N   0  0  0  0  0  0  0  0  0  0  0  0
   -4.2180    2.1859    0.0000 C   0  0  0  0  0  0  0  0  0  0  0  0
   -5.4664    1.5220   -0.0000 C   0  0  0  0  0  0  0  0  0  0  0  0
   -5.5387    0.1064   -0.0000 C   0  0  0  0  0  0  0  0  0  0  0  0
   -6.8018   -0.5217   -0.0000 N   0  0  0  0  0  0  0  0  0  0  0  0
   -4.3200   -0.5966   -0.0000 C   0  0  0  0  0  0  0  0  0  0  0  0
   -4.0657   -1.8751    0.0000 N   0  0  0  0  0  0  0  0  0  0  0  0
   -2.7613   -1.9970    0.0000 C   0  0  0  0  0  0  0  0  0  0  0  0
   -2.1582   -0.8326    0.0000 N   0  0  0  0  0  0  0  0  0  0  0  0
   -3.1050    0.0620    0.0000 C   0  0  0  0  0  0  0  0  0  0  0  0
   -3.0070    1.4555    0.0000 C   0  0  0  0  0  0  0  0  0  0  0  0
   -5.0375    4.1391    0.0000 H   0  0  0  0  0  0  0  0  0  0  0  0
   -3.2905    4.0918   -0.0000 H   0  0  0  0  0  0  0  0  0  0  0  0
   -6.3836    2.1053   -0.0000 H   0  0  0  0  0  0  0  0  0  0  0  0
   -7.6521    0.0351   -0.0000 H   0  0  0  0  0  0  0  0  0  0  0  0
   -6.8941   -1.5302   -0.0000 H   0  0  0  0  0  0  0  0  0  0  0  0
   -2.2446   -2.9503    0.0000 H   0  0  0  0  0  0  0  0  0  0  0  0
   -4.8724   -3.0981   -0.0000 C   0  0  0  0  0  0  0  0  0  0  0  0
   -4.2317   -3.9868    0.0000 H   0  0  0  0  0  0  0  0  0  0  0  0
   -5.4926   -3.0994   -0.9020 H   0  0  0  0  0  0  0  0  0  0  0  0
   -5.4927   -3.0994    0.9020 H   0  0  0  0  0  0  0  0  0  0  0  0
   -2.0494    1.9633    0.0000 H   0  0  0  0  0  0  0  0  0  0  0  0
   -0.6801   -0.8516    0.0000 C   0  0  1  0  0  0  0  0  0  0  0  0
   -0.3097   -1.8839    0.0000 H   0  0  0  0  0  0  0  0  0  0  0  0
   -0.0000   -0.0000   -1.0933 C   0  0  0  0  0  0  0  0  0  0  0  0
    0.6946   -0.5718   -1.7163 H   0  0  0  0  0  0  0  0  0  0  0  0
   -0.6946    0.5718   -1.7163 H   0  0  0  0  0  0  0  0  0  0  0  0
    0.6801    0.8516   -0.0000 C   0  0  1  0  0  0  0  0  0  0  0  0
    0.3097    1.8839   -0.0000 H   0  0  0  0  0  0  0  0  0  0  0  0
   -0.0000   -0.0000    1.0933 C   0  0  0  0  0  0  0  0  0  0  0  0
   -0.6946    0.5718    1.7163 H   0  0  0  0  0  0  0  0  0  0  0  0
    0.6946   -0.5718    1.7163 H   0  0  0  0  0  0  0  0  0  0  0  0
  1 13  1  0  0  0  0
  2 11  2  0  0  0  0
  2  1  1  0  0  0  0
  3 14  1  0  0  0  0
  3  2  1  0  0  0  0
  4  6  1  0  0  0  0
  4  3  2  0  0  0  0
  5  4  1  0  0  0  0
  5 16  1  0  0  0  0
  6  7  1  0  0  0  0
  6 10  2  0  0  0  0
  7 18  1  0  0  0  0
  8  7  1  0  0  0  0
  8  9  1  0  0  0  0
  9 10  1  0  0  0  0
  9 50  1  0  0  0  0
 10 11  1  0  0  0  0
 11 22  1  0  0  0  0
 12  1  1  0  0  0  0
 15  5  1  0  0  0  0
 17  8  1  0  0  0  0
 18 19  1  0  0  0  0
 20 18  1  0  0  0  0
 21 18  1  0  0  0  0
 23 34  1  0  0  0  0
 24 33  2  0  0  0  0
 24 23  1  0  0  0  0
 25 24  1  0  0  0  0
 26 25  2  0  0  0  0
 26 28  1  0  0  0  0
 27 26  1  0  0  0  0
 28 29  1  0  0  0  0
 28 32  2  0  0  0  0
 29 30  1  0  0  0  0
 30 31  1  0  0  0  0
 30 39  1  0  0  0  0
 31 45  1  0  0  0  0
 32 33  1  0  0  0  0
 32 31  1  0  0  0  0
 33 44  1  0  0  0  0
 35 23  1  0  0  0  0
 36 25  1  0  0  0  0
 37 27  1  0  0  0  0
 38 27  1  0  0  0  0
 40 29  1  0  0  0  0
 40 41  1  0  0  0  0
 40 43  1  0  0  0  0
 42 40  1  0  0  0  0
 45 46  1  1  0  0  0
 45 52  1  0  0  0  0
 47 50  1  0  0  0  0
 47 45  1  0  0  0  0
 48 47  1  0  0  0  0
 49 47  1  0  0  0  0
 50 51  1  6  0  0  0
 50 52  1  0  0  0  0
 52 53  1  0  0  0  0
 52 54  1  0  0  0  0
M  END
>  <energy_and_gap>
-15.404  4.892

$$$$
BEA_38/Syn006939/Syn006939.car
 OpenBabel12061810373D

 49 52  0  0  1  0  0  0  0  0999 V2000
    1.3559    2.0040    0.3962 N   0  0  0  0  0  0  0  0  0  0  0  0
    2.0592    1.3043   -0.5804 N   0  0  0  0  0  0  0  0  0  0  0  0
    1.2023    1.0740   -1.5338 C   0  0  0  0  0  0  0  0  0  0  0  0
    1.5280    0.5593   -2.4280 H   0  0  0  0  0  0  0  0  0  0  0  0
   -0.0449    1.5027   -1.2507 C   0  0  0  0  0  0  0  0  0  0  0  0
   -1.2264    1.4031   -1.9742 C   0  0  0  0  0  0  0  0  0  0  0  0
   -1.2885    0.9346   -2.9513 H   0  0  0  0  0  0  0  0  0  0  0  0
   -2.3579    1.9464   -1.3290 C   0  0  0  0  0  0  0  0  0  0  0  0
   -3.3184    1.8953   -1.8329 H   0  0  0  0  0  0  0  0  0  0  0  0
   -2.2493    2.5470   -0.0456 C   0  0  1  0  0  0  0  0  0  0  0  0
   -3.4019    3.0748    0.5714 N   0  0  0  0  0  0  0  0  0  0  0  0
   -3.3469    3.5111    1.4880 H   0  0  0  0  0  0  0  0  0  0  0  0
   -4.3053    3.0302    0.1073 H   0  0  0  0  0  0  0  0  0  0  0  0
   -0.9991    2.6240    0.6293 C   0  0  0  0  0  0  0  0  0  0  0  0
   -0.9146    3.0808    1.6107 H   0  0  0  0  0  0  0  0  0  0  0  0
    0.1080    2.0720   -0.0226 C   0  0  0  0  0  0  0  0  0  0  0  0
    1.9844    2.5023    1.6218 C   0  0  0  0  0  0  0  0  0  0  0  0
    3.0097    2.8144    1.4098 H   0  0  0  0  0  0  0  0  0  0  0  0
    1.4211    3.3680    1.9820 H   0  0  0  0  0  0  0  0  0  0  0  0
    1.9608    1.7033    2.3678 H   0  0  0  0  0  0  0  0  0  0  0  0
    0.9272   -2.1649   -0.5367 N   0  0  0  0  0  0  0  0  0  0  0  0
    1.7921   -1.6461    0.4242 N   0  0  0  0  0  0  0  0  0  0  0  0
    1.0384   -1.3308    1.4398 C   0  0  0  0  0  0  0  0  0  0  0  0
    1.4928   -0.9272    2.3350 H   0  0  0  0  0  0  0  0  0  0  0  0
   -0.2762   -1.5340    1.2189 C   0  0  0  0  0  0  0  0  0  0  0  0
   -1.3812   -1.2829    2.0222 C   0  0  0  0  0  0  0  0  0  0  0  0
   -1.3086   -0.8618    3.0199 H   0  0  0  0  0  0  0  0  0  0  0  0
   -2.6220   -1.6049    1.4322 C   0  0  0  0  0  0  0  0  0  0  0  0
   -3.5301   -1.4267    2.0003 H   0  0  0  0  0  0  0  0  0  0  0  0
   -2.6879   -2.1508    0.1221 C   0  0  1  0  0  0  0  0  0  0  0  0
   -3.9451   -2.4572   -0.4378 N   0  0  0  0  0  0  0  0  0  0  0  0
   -4.8004   -2.2923    0.0864 H   0  0  0  0  0  0  0  0  0  0  0  0
   -4.0157   -2.8507   -1.3724 H   0  0  0  0  0  0  0  0  0  0  0  0
   -1.5087   -2.3924   -0.6364 C   0  0  0  0  0  0  0  0  0  0  0  0
   -1.5599   -2.8084   -1.6379 H   0  0  0  0  0  0  0  0  0  0  0  0
   -0.2895   -2.0560   -0.0392 C   0  0  0  0  0  0  0  0  0  0  0  0
    1.4175   -2.6960   -1.8102 C   0  0  0  0  0  0  0  0  0  0  0  0
    1.8948   -1.8846   -2.3665 H   0  0  0  0  0  0  0  0  0  0  0  0
    2.1281   -3.5002   -1.5963 H   0  0  0  0  0  0  0  0  0  0  0  0
    0.5800   -3.0952   -2.3882 H   0  0  0  0  0  0  0  0  0  0  0  0
    3.2478   -1.5349    0.2491 C   0  0  0  0  0  0  0  0  0  0  0  0
    3.5205   -1.8322   -0.7656 H   0  0  0  0  0  0  0  0  0  0  0  0
    3.6853   -2.2697    0.9326 H   0  0  0  0  0  0  0  0  0  0  0  0
    3.8183   -0.1349    0.5566 C   0  0  0  0  0  0  0  0  0  0  0  0
    3.4999    0.1862    1.5507 H   0  0  0  0  0  0  0  0  0  0  0  0
    4.9079   -0.2226    0.5984 H   0  0  0  0  0  0  0  0  0  0  0  0
    3.4801    0.9463   -0.4920 C   0  0  0  0  0  0  0  0  0  0  0  0
    3.7929    0.6124   -1.4873 H   0  0  0  0  0  0  0  0  0  0  0  0
    4.0293    1.8691   -0.2839 H   0  0  0  0  0  0  0  0  0  0  0  0
  1 17  1  0  0  0  0
  2 47  1  0  0  0  0
  2  1  1  0  0  0  0
  3  5  2  0  0  0  0
  3  2  1  0  0  0  0
  4  3  1  0  0  0  0
  5 16  1  0  0  0  0
  6  8  2  0  0  0  0
  6  5  1  0  0  0  0
  7  6  1  0  0  0  0
  8 10  1  0  0  0  0
  9  8  1  0  0  0  0
 10 11  1  1  0  0  0
 10 14  1  0  0  0  0
 11 12  1  0  0  0  0
 13 11  1  0  0  0  0
 14 15  1  0  0  0  0
 16  1  1  0  0  0  0
 16 14  2  0  0  0  0
 17 19  1  0  0  0  0
 17 20  1  0  0  0  0
 18 17  1  0  0  0  0
 21 36  1  0  0  0  0
 21 22  1  0  0  0  0
 22 23  1  0  0  0  0
 23 24  1  0  0  0  0
 25 23  2  0  0  0  0
 25 26  1  0  0  0  0
 26 27  1  0  0  0  0
 28 29  1  0  0  0  0
 28 26  2  0  0  0  0
 30 31  1  6  0  0  0
 30 28  1  0  0  0  0
 31 32  1  0  0  0  0
 33 31  1  0  0  0  0
 34 36  2  0  0  0  0
 34 30  1  0  0  0  0
 35 34  1  0  0  0  0
 36 25  1  0  0  0  0
 37 39  1  0  0  0  0
 37 21  1  0  0  0  0
 38 37  1  0  0  0  0
 40 37  1  0  0  0  0
 41 22  1  0  0  0  0
 41 44  1  0  0  0  0
 41 43  1  0  0  0  0
 42 41  1  0  0  0  0
 44 46  1  0  0  0  0
 44 45  1  0  0  0  0
 47 49  1  0  0  0  0
 47 44  1  0  0  0  0
 48 47  1  0  0  0  0
M  END
>  <energy_and_gap>
-15.060  2.162

$$$$
BEA_34/Syn019098/Syn019098.car
 OpenBabel12061810373D

 52 55  0  0  1  0  0  0  0  0999 V2000
   -4.8253   -1.0339    0.0188 N   0  0  0  0  0  0  0  0  0  0  0  0
   -4.1201   -0.3444    0.9074 C   0  0  2  0  0  0  0  0  0  0  0  0
   -3.7414    0.8375    0.4384 N   0  0  0  0  0  0  0  0  0  0  0  0
   -4.9190   -0.2537   -1.0889 C   0  0  0  0  0  0  0  0  0  0  0  0
   -4.2307    0.9415   -0.8178 C   0  0  0  0  0  0  0  0  0  0  0  0
   -3.8051   -0.7945    2.1741 N   0  0  0  0  0  0  0  0  0  0  0  0
   -5.6212   -0.5819   -2.3740 C   0  0  0  0  0  0  0  0  0  0  0  0
   -4.0236    1.8529   -1.3627 H   0  0  0  0  0  0  0  0  0  0  0  0
   -4.1028   -1.7058    2.5041 H   0  0  0  0  0  0  0  0  0  0  0  0
   -3.2719   -0.2176    2.8159 H   0  0  0  0  0  0  0  0  0  0  0  0
   -6.0865   -1.5703   -2.3445 H   0  0  0  0  0  0  0  0  0  0  0  0
   -6.4055    0.1551   -2.5701 H   0  0  0  0  0  0  0  0  0  0  0  0
   -4.9082   -0.5683   -3.2037 H   0  0  0  0  0  0  0  0  0  0  0  0
   -5.4294   -2.3662    0.1012 C   0  0  0  0  0  0  0  0  0  0  0  0
   -6.5113   -2.2649   -0.0329 H   0  0  0  0  0  0  0  0  0  0  0  0
   -5.2254   -2.8158    1.0756 H   0  0  0  0  0  0  0  0  0  0  0  0
   -4.9959   -2.9926   -0.6851 H   0  0  0  0  0  0  0  0  0  0  0  0
    4.5762   -2.5367    0.0399 C   0  0  0  0  0  0  0  0  0  0  0  0
    5.9202   -2.1225    0.0481 C   0  0  0  0  0  0  0  0  0  0  0  0
    6.2411   -0.7557   -0.0077 C   0  0  0  0  0  0  0  0  0  0  0  0
    5.2226    0.2122   -0.0725 C   0  0  0  0  0  0  0  0  0  0  0  0
    3.8616   -0.1896   -0.0816 C   0  0  0  0  0  0  0  0  0  0  0  0
    3.5289   -1.5839   -0.0247 C   0  0  0  0  0  0  0  0  0  0  0  0
    2.7718    0.6944   -0.1453 C   0  0  0  0  0  0  0  0  0  0  0  0
    1.4105    0.2345   -0.1539 C   0  0  0  0  0  0  0  0  0  0  0  0
    1.0858   -1.1278   -0.0911 C   0  0  0  0  0  0  0  0  0  0  0  0
    2.1799   -2.0266   -0.0299 C   0  0  0  0  0  0  0  0  0  0  0  0
    2.7086    2.0540   -0.2075 N   0  0  0  0  0  0  0  0  0  0  0  0
    1.4401    2.3878   -0.2562 C   0  0  0  0  0  0  0  0  0  0  0  0
    0.6315    1.3514   -0.2318 N   0  0  0  0  0  0  0  0  0  0  0  0
   -0.2309   -1.6356   -0.0784 N   0  0  0  0  0  0  0  0  0  0  0  0
    4.3590   -3.5999    0.0843 H   0  0  0  0  0  0  0  0  0  0  0  0
    6.7128   -2.8615    0.0978 H   0  0  0  0  0  0  0  0  0  0  0  0
    7.2807   -0.4457   -0.0010 H   0  0  0  0  0  0  0  0  0  0  0  0
    5.5169    1.2528   -0.1145 H   0  0  0  0  0  0  0  0  0  0  0  0
    1.0952    3.4140   -0.3104 H   0  0  0  0  0  0  0  0  0  0  0  0
   -1.0391   -1.0276   -0.0535 H   0  0  0  0  0  0  0  0  0  0  0  0
   -0.3910   -2.6394   -0.0656 H   0  0  0  0  0  0  0  0  0  0  0  0
    3.7140    3.1175   -0.2291 C   0  0  0  0  0  0  0  0  0  0  0  0
    4.3430    2.9751   -1.1134 H   0  0  0  0  0  0  0  0  0  0  0  0
    3.2352    4.1015   -0.2782 H   0  0  0  0  0  0  0  0  0  0  0  0
    4.3054    3.0474    0.6891 H   0  0  0  0  0  0  0  0  0  0  0  0
    1.9772   -3.0937    0.0186 H   0  0  0  0  0  0  0  0  0  0  0  0
   -0.8103    1.6249   -0.2956 C   0  0  0  0  0  0  0  0  0  0  0  0
   -1.2528    0.8657   -0.9452 H   0  0  0  0  0  0  0  0  0  0  0  0
   -0.9654    2.5863   -0.8000 H   0  0  0  0  0  0  0  0  0  0  0  0
   -1.4522    1.6423    1.1033 C   0  0  0  0  0  0  0  0  0  0  0  0
   -0.9711    2.4178    1.7074 H   0  0  0  0  0  0  0  0  0  0  0  0
   -1.2567    0.6946    1.6135 H   0  0  0  0  0  0  0  0  0  0  0  0
   -2.9646    1.9195    1.0601 C   0  0  0  0  0  0  0  0  0  0  0  0
   -3.3527    2.0441    2.0764 H   0  0  0  0  0  0  0  0  0  0  0  0
   -3.1741    2.8521    0.5241 H   0  0  0  0  0  0  0  0  0  0  0  0
  1 14  1  0  0  0  0
  1  2  1  0  0  0  0
  2  6  1  6  0  0  0
  3  2  1  0  0  0  0
  3 50  1  0  0  0  0
  4  5  2  0  0  0  0
  4  1  1  0  0  0  0
  5  3  1  0  0  0  0
  6  9  1  0  0  0  0
  6 10  1  0  0  0  0
  7 11  1  0  0  0  0
  7  4  1  0  0  0  0
  8  5  1  0  0  0  0
 12  7  1  0  0  0  0
 13  7  1  0  0  0  0
 14 16  1  0  0  0  0
 15 14  1  0  0  0  0
 17 14  1  0  0  0  0
 18 19  1  0  0  0  0
 18 32  1  0  0  0  0
 19 33  1  0  0  0  0
 20 34  1  0  0  0  0
 20 19  2  0  0  0  0
 21 20  1  0  0  0  0
 22 21  1  0  0  0  0
 22 23  1  0  0  0  0
 23 18  2  0  0  0  0
 24 22  2  0  0  0  0
 25 24  1  0  0  0  0
 25 26  2  0  0  0  0
 26 31  1  0  0  0  0
 26 27  1  0  0  0  0
 27 23  1  0  0  0  0
 27 43  1  0  0  0  0
 28 24  1  0  0  0  0
 29 30  1  0  0  0  0
 29 28  1  0  0  0  0
 30 25  1  0  0  0  0
 31 38  1  0  0  0  0
 31 37  1  0  0  0  0
 35 21  1  0  0  0  0
 36 29  1  0  0  0  0
 39 28  1  0  0  0  0
 39 42  1  0  0  0  0
 40 39  1  0  0  0  0
 41 39  1  0  0  0  0
 44 30  1  0  0  0  0
 44 47  1  0  0  0  0
 45 44  1  0  0  0  0
 46 44  1  0  0  0  0
 47 49  1  0  0  0  0
 47 48  1  0  0  0  0
 50 47  1  0  0  0  0
 50 51  1  0  0  0  0
 52 50  1  0  0  0  0
M  END
>  <energy_and_gap>
-15.213 83.271

$$$$
BEA_34/Syn020515/Syn020515.car
 OpenBabel12061810373D

 51 53  0  0  1  0  0  0  0  0999 V2000
   -5.1139   -1.3806   -0.4645 C   0  0  0  0  0  0  0  0  0  0  0  0
   -4.5698   -0.0740    0.0452 C   0  0  2  0  0  0  0  0  0  0  0  0
   -3.2799    0.1639    0.2744 N   0  0  0  0  0  0  0  0  0  0  0  0
   -3.1999    1.4441    0.7130 C   0  0  0  0  0  0  0  0  0  0  0  0
   -2.0535    2.1290    1.0578 N   0  0  0  0  0  0  0  0  0  0  0  0
   -4.4983    1.9736    0.7467 C   0  0  0  0  0  0  0  0  0  0  0  0
   -5.3184    0.9877    0.3240 N   0  0  0  0  0  0  0  0  0  0  0  0
   -6.1303   -1.2687   -0.8512 H   0  0  0  0  0  0  0  0  0  0  0  0
   -4.4911   -1.7637   -1.2778 H   0  0  0  0  0  0  0  0  0  0  0  0
   -5.1306   -2.1164    0.3444 H   0  0  0  0  0  0  0  0  0  0  0  0
   -2.0946    3.0881    1.3916 H   0  0  0  0  0  0  0  0  0  0  0  0
   -1.1387    1.6987    0.9725 H   0  0  0  0  0  0  0  0  0  0  0  0
   -4.9471    2.9215    1.0133 H   0  0  0  0  0  0  0  0  0  0  0  0
   -6.7686    1.1392    0.2160 C   0  0  0  0  0  0  0  0  0  0  0  0
   -7.2441    0.3273    0.7758 H   0  0  0  0  0  0  0  0  0  0  0  0
   -7.0400    1.0894   -0.8433 H   0  0  0  0  0  0  0  0  0  0  0  0
   -7.0735    2.1036    0.6354 H   0  0  0  0  0  0  0  0  0  0  0  0
    2.4336   -1.3215    0.7856 N   0  0  0  0  0  0  0  0  0  0  0  0
    1.3039   -1.9304    0.4384 C   0  0  2  0  0  0  0  0  0  0  0  0
    0.7996   -1.4434   -0.6834 N   0  0  0  0  0  0  0  0  0  0  0  0
    2.7098   -0.4021   -0.1873 C   0  0  0  0  0  0  0  0  0  0  0  0
    1.6435   -0.4775   -1.1062 C   0  0  0  0  0  0  0  0  0  0  0  0
    3.8964    0.4476   -0.1648 C   0  0  0  0  0  0  0  0  0  0  0  0
    0.7086   -2.9506    1.1567 N   0  0  0  0  0  0  0  0  0  0  0  0
    5.1990   -0.1114   -0.0922 C   0  0  0  0  0  0  0  0  0  0  0  0
    3.7618    1.8557   -0.2603 C   0  0  0  0  0  0  0  0  0  0  0  0
    4.9010    2.6834   -0.2608 C   0  0  0  0  0  0  0  0  0  0  0  0
    6.3342    0.7215   -0.0933 C   0  0  0  0  0  0  0  0  0  0  0  0
    6.1857    2.1175   -0.1754 C   0  0  0  0  0  0  0  0  0  0  0  0
    1.3886    0.0363   -2.0239 H   0  0  0  0  0  0  0  0  0  0  0  0
    1.1499   -3.3471    1.9798 H   0  0  0  0  0  0  0  0  0  0  0  0
   -0.1808   -3.3450    0.8704 H   0  0  0  0  0  0  0  0  0  0  0  0
    5.3396   -1.1867   -0.0389 H   0  0  0  0  0  0  0  0  0  0  0  0
    2.7811    2.3172   -0.3276 H   0  0  0  0  0  0  0  0  0  0  0  0
    4.7881    3.7602   -0.3282 H   0  0  0  0  0  0  0  0  0  0  0  0
    7.3258    0.2857   -0.0339 H   0  0  0  0  0  0  0  0  0  0  0  0
    7.0618    2.7574   -0.1767 H   0  0  0  0  0  0  0  0  0  0  0  0
    3.1859   -1.6101    2.0137 C   0  0  0  0  0  0  0  0  0  0  0  0
    3.8355   -0.7662    2.2606 H   0  0  0  0  0  0  0  0  0  0  0  0
    3.7795   -2.5148    1.8474 H   0  0  0  0  0  0  0  0  0  0  0  0
    2.4854   -1.7520    2.8425 H   0  0  0  0  0  0  0  0  0  0  0  0
   -2.1665   -0.7835    0.1117 C   0  0  0  0  0  0  0  0  0  0  0  0
   -1.4371   -0.5615    0.8967 H   0  0  0  0  0  0  0  0  0  0  0  0
   -2.5553   -1.7850    0.3244 H   0  0  0  0  0  0  0  0  0  0  0  0
   -1.5061   -0.7617   -1.2487 C   0  0  0  0  0  0  0  0  0  0  0  0
   -1.8647    0.0674   -2.2606 C   0  0  0  0  0  0  0  0  0  0  0  0
   -2.6571    0.7991   -2.1682 H   0  0  0  0  0  0  0  0  0  0  0  0
   -1.3614    0.0283   -3.2202 H   0  0  0  0  0  0  0  0  0  0  0  0
   -0.4015   -1.7623   -1.4666 C   0  0  0  0  0  0  0  0  0  0  0  0
   -0.0987   -1.8117   -2.5194 H   0  0  0  0  0  0  0  0  0  0  0  0
   -0.7350   -2.7694   -1.1982 H   0  0  0  0  0  0  0  0  0  0  0  0
  1 10  1  0  0  0  0
  2  1  1  1  0  0  0
  2  3  1  0  0  0  0
  2  7  1  0  0  0  0
  3  4  1  0  0  0  0
  4  6  2  0  0  0  0
  4  5  1  0  0  0  0
  5 11  1  0  0  0  0
  6 13  1  0  0  0  0
  7  6  1  0  0  0  0
  8  1  1  0  0  0  0
  9  1  1  0  0  0  0
 12  5  1  0  0  0  0
 14  7  1  0  0  0  0
 14 17  1  0  0  0  0
 14 15  1  0  0  0  0
 16 14  1  0  0  0  0
 18 38  1  0  0  0  0
 19 18  1  0  0  0  0
 19 24  1  1  0  0  0
 20 19  1  0  0  0  0
 21 23  1  0  0  0  0
 21 18  1  0  0  0  0
 22 20  1  0  0  0  0
 22 21  2  0  0  0  0
 23 25  2  0  0  0  0
 24 31  1  0  0  0  0
 25 33  1  0  0  0  0
 26 23  1  0  0  0  0
 27 26  2  0  0  0  0
 27 29  1  0  0  0  0
 28 25  1  0  0  0  0
 28 36  1  0  0  0  0
 29 28  2  0  0  0  0
 30 22  1  0  0  0  0
 32 24  1  0  0  0  0
 34 26  1  0  0  0  0
 35 27  1  0  0  0  0
 37 29  1  0  0  0  0
 38 39  1  0  0  0  0
 38 41  1  0  0  0  0
 40 38  1  0  0  0  0
 42  3  1  0  0  0  0
 42 44  1  0  0  0  0
 42 43  1  0  0  0  0
 45 42  1  0  0  0  0
 46 47  1  0  0  0  0
 46 45  2  0  0  0  0
 48 46  1  0  0  0  0
 49 45  1  0  0  0  0
 49 51  1  0  0  0  0
 49 20  1  0  0  0  0
 50 49  1  0  0  0  0
M  END
>  <energy_and_gap>
-15.112 79.411

$$$$
BEA_34/Syn006787/Syn006787.car
 OpenBabel12061810373D

 50 52  0  0  1  0  0  0  0  0999 V2000
   -4.0687    0.9835   -0.2181 C   0  0  2  0  0  0  0  0  0  0  0  0
   -5.1535    1.6787    0.0826 N   0  0  0  0  0  0  0  0  0  0  0  0
   -6.2129    0.8612   -0.1011 C   0  0  0  0  0  0  0  0  0  0  0  0
   -5.7060   -0.3754   -0.5328 C   0  0  0  0  0  0  0  0  0  0  0  0
   -4.3594   -0.2536   -0.5919 N   0  0  0  0  0  0  0  0  0  0  0  0
   -2.7863    1.4891   -0.1466 N   0  0  0  0  0  0  0  0  0  0  0  0
   -7.1968    1.2626    0.1001 H   0  0  0  0  0  0  0  0  0  0  0  0
   -6.1356   -1.3306   -0.8025 H   0  0  0  0  0  0  0  0  0  0  0  0
   -2.6190    2.4453    0.1497 H   0  0  0  0  0  0  0  0  0  0  0  0
   -1.9837    0.9207   -0.3914 H   0  0  0  0  0  0  0  0  0  0  0  0
   -5.2685    3.0648    0.5347 C   0  0  0  0  0  0  0  0  0  0  0  0
   -4.8372    3.7138   -0.2342 H   0  0  0  0  0  0  0  0  0  0  0  0
   -6.3222    3.3191    0.6881 H   0  0  0  0  0  0  0  0  0  0  0  0
   -4.7203    3.1651    1.4770 H   0  0  0  0  0  0  0  0  0  0  0  0
    4.8325    0.7674   -1.9142 N   0  0  0  0  0  0  0  0  0  0  0  0
    4.9995    0.5703   -0.5586 C   0  0  1  0  0  0  0  0  0  0  0  0
    6.0959    0.0590   -0.0221 N   0  0  0  0  0  0  0  0  0  0  0  0
    5.9066    0.0244    1.3142 C   0  0  0  0  0  0  0  0  0  0  0  0
    4.6264    0.5460    1.5596 C   0  0  0  0  0  0  0  0  0  0  0  0
    4.0898    0.8697    0.3586 N   0  0  0  0  0  0  0  0  0  0  0  0
    2.7446    1.4531    0.2565 C   0  0  0  0  0  0  0  0  0  0  0  0
    1.6620    0.4055    0.1797 C   0  0  2  0  0  0  0  0  0  0  0  0
    1.0226   -0.0649    1.3514 C   0  0  0  0  0  0  0  0  0  0  0  0
    0.0243   -1.0482    1.2272 C   0  0  0  0  0  0  0  0  0  0  0  0
   -0.3776   -1.5812    0.0405 N   0  0  0  0  0  0  0  0  0  0  0  0
    0.2609   -1.1293   -1.0749 C   0  0  0  0  0  0  0  0  0  0  0  0
    1.2707   -0.1501   -1.0616 C   0  0  0  0  0  0  0  0  0  0  0  0
    5.5601    0.5067   -2.5719 H   0  0  0  0  0  0  0  0  0  0  0  0
    3.9905    1.1922   -2.2870 H   0  0  0  0  0  0  0  0  0  0  0  0
    6.7097   -0.3657    1.9247 H   0  0  0  0  0  0  0  0  0  0  0  0
    4.0286    0.7271    2.4426 H   0  0  0  0  0  0  0  0  0  0  0  0
    2.7193    2.1020   -0.6257 H   0  0  0  0  0  0  0  0  0  0  0  0
    2.5903    2.1098    1.1211 H   0  0  0  0  0  0  0  0  0  0  0  0
    1.2870    0.3195    2.3312 H   0  0  0  0  0  0  0  0  0  0  0  0
   -0.4733   -1.4181    2.1187 H   0  0  0  0  0  0  0  0  0  0  0  0
   -0.0482   -1.5617   -2.0217 H   0  0  0  0  0  0  0  0  0  0  0  0
    1.7297    0.1672   -1.9921 H   0  0  0  0  0  0  0  0  0  0  0  0
    7.3206   -0.4008   -0.6762 C   0  0  0  0  0  0  0  0  0  0  0  0
    7.7596    0.4444   -1.2161 H   0  0  0  0  0  0  0  0  0  0  0  0
    7.0582   -1.2071   -1.3686 H   0  0  0  0  0  0  0  0  0  0  0  0
    8.0269   -0.7702    0.0744 H   0  0  0  0  0  0  0  0  0  0  0  0
   -1.4152   -2.6150   -0.0195 C   0  0  0  0  0  0  0  0  0  0  0  0
   -1.3387   -3.1301   -0.9837 H   0  0  0  0  0  0  0  0  0  0  0  0
   -1.1780   -3.3593    0.7500 H   0  0  0  0  0  0  0  0  0  0  0  0
   -2.7951   -2.0299    0.1516 C   0  0  2  0  0  0  0  0  0  0  0  0
   -3.4482   -2.1954    1.2452 N   0  0  0  0  0  0  0  0  0  0  0  0
   -2.9057   -2.7056    1.9530 H   0  0  0  0  0  0  0  0  0  0  0  0
   -3.4881   -1.3623   -1.0056 C   0  0  0  0  0  0  0  0  0  0  0  0
   -2.7633   -0.9444   -1.7121 H   0  0  0  0  0  0  0  0  0  0  0  0
   -4.0896   -2.0925   -1.5587 H   0  0  0  0  0  0  0  0  0  0  0  0
  1  6  1  1  0  0  0
  1  2  1  0  0  0  0
  2 11  1  0  0  0  0
  3  2  1  0  0  0  0
  3  7  1  0  0  0  0
  4  3  2  0  0  0  0
  5  4  1  0  0  0  0
  5  1  1  0  0  0  0
  6  9  1  0  0  0  0
  8  4  1  0  0  0  0
 10  6  1  0  0  0  0
 11 13  1  0  0  0  0
 11 14  1  0  0  0  0
 12 11  1  0  0  0  0
 16 15  1  1  0  0  0
 16 17  1  0  0  0  0
 16 20  1  0  0  0  0
 17 18  1  0  0  0  0
 18 19  2  0  0  0  0
 18 30  1  0  0  0  0
 19 31  1  0  0  0  0
 20 19  1  0  0  0  0
 21 20  1  0  0  0  0
 21 33  1  0  0  0  0
 22 21  1  1  0  0  0
 22 23  1  0  0  0  0
 23 34  1  0  0  0  0
 24 23  2  0  0  0  0
 24 35  1  0  0  0  0
 25 24  1  0  0  0  0
 26 27  2  0  0  0  0
 26 25  1  0  0  0  0
 27 22  1  0  0  0  0
 28 15  1  0  0  0  0
 29 15  1  0  0  0  0
 32 21  1  0  0  0  0
 36 26  1  0  0  0  0
 37 27  1  0  0  0  0
 38 17  1  0  0  0  0
 38 41  1  0  0  0  0
 39 38  1  0  0  0  0
 40 38  1  0  0  0  0
 42 25  1  0  0  0  0
 42 45  1  0  0  0  0
 42 44  1  0  0  0  0
 43 42  1  0  0  0  0
 45 48  1  6  0  0  0
 45 46  1  0  0  0  0
 46 47  1  0  0  0  0
 48  5  1  0  0  0  0
 49 48  1  0  0  0  0
 50 48  1  0  0  0  0
M  RAD  2  45   2  46   2
M  END
>  <energy_and_gap>
-15.180 75.745

$$$$
BEA_34/Syn008822/Syn008822.car
 OpenBabel12061810373D

 51 53  0  0  1  0  0  0  0  0999 V2000
    5.0165   -0.2428    0.5576 C   0  0  2  0  0  0  0  0  0  0  0  0
    6.0375   -0.0377   -0.2588 N   0  0  0  0  0  0  0  0  0  0  0  0
    5.8079   -0.7643   -1.3738 C   0  0  0  0  0  0  0  0  0  0  0  0
    4.5829   -1.4247   -1.1868 C   0  0  0  0  0  0  0  0  0  0  0  0
    4.1209   -1.0681    0.0349 N   0  0  0  0  0  0  0  0  0  0  0  0
    4.8992    0.3443    1.8008 N   0  0  0  0  0  0  0  0  0  0  0  0
    6.5471   -0.7205   -2.1620 H   0  0  0  0  0  0  0  0  0  0  0  0
    3.9798   -2.1058   -1.7721 H   0  0  0  0  0  0  0  0  0  0  0  0
    5.6190    0.9671    2.1531 H   0  0  0  0  0  0  0  0  0  0  0  0
    4.0953    0.1683    2.3937 H   0  0  0  0  0  0  0  0  0  0  0  0
    7.2226    0.7979   -0.0682 C   0  0  0  0  0  0  0  0  0  0  0  0
    7.8685    0.7336   -0.9499 H   0  0  0  0  0  0  0  0  0  0  0  0
    7.7600    0.4354    0.8139 H   0  0  0  0  0  0  0  0  0  0  0  0
    6.8938    1.8319    0.0777 H   0  0  0  0  0  0  0  0  0  0  0  0
   -1.2631    0.2426    1.8118 N   0  0  0  0  0  0  0  0  0  0  0  0
   -1.0380    1.0037    0.6825 C   0  0  1  0  0  0  0  0  0  0  0  0
    0.1430    1.1153    0.0908 N   0  0  0  0  0  0  0  0  0  0  0  0
   -0.0237    1.9386   -0.9691 C   0  0  0  0  0  0  0  0  0  0  0  0
   -1.3758    2.3155   -0.9887 C   0  0  0  0  0  0  0  0  0  0  0  0
   -1.9764    1.7023    0.0584 N   0  0  0  0  0  0  0  0  0  0  0  0
   -3.4077    1.8786    0.3453 C   0  0  0  0  0  0  0  0  0  0  0  0
   -4.2479    0.7142   -0.1186 C   0  0  0  0  0  0  0  0  0  0  0  0
   -4.3821    0.3956   -1.4919 C   0  0  0  0  0  0  0  0  0  0  0  0
   -5.1796   -0.6954   -1.8821 C   0  0  0  0  0  0  0  0  0  0  0  0
   -5.8278   -1.4378   -0.8803 C   0  0  0  0  0  0  0  0  0  0  0  0
   -5.7280   -1.1603    0.4462 N   0  0  0  0  0  0  0  0  0  0  0  0
   -4.9508   -0.1010    0.8014 C   0  0  0  0  0  0  0  0  0  0  0  0
   -2.1715    0.2227    2.2620 H   0  0  0  0  0  0  0  0  0  0  0  0
   -0.5207   -0.3136    2.2233 H   0  0  0  0  0  0  0  0  0  0  0  0
    0.8436    2.1533   -1.5787 H   0  0  0  0  0  0  0  0  0  0  0  0
   -1.9878    2.9441   -1.6213 H   0  0  0  0  0  0  0  0  0  0  0  0
   -3.5031    2.0318    1.4262 H   0  0  0  0  0  0  0  0  0  0  0  0
   -3.7532    2.8026   -0.1329 H   0  0  0  0  0  0  0  0  0  0  0  0
   -3.8808    0.9859   -2.2519 H   0  0  0  0  0  0  0  0  0  0  0  0
   -5.2947   -0.9552   -2.9290 H   0  0  0  0  0  0  0  0  0  0  0  0
   -6.4500   -2.2834   -1.1575 H   0  0  0  0  0  0  0  0  0  0  0  0
   -4.8873    0.1051    1.8665 H   0  0  0  0  0  0  0  0  0  0  0  0
   -6.4107   -1.9384    1.4789 C   0  0  0  0  0  0  0  0  0  0  0  0
   -6.9746   -2.7545    1.0156 H   0  0  0  0  0  0  0  0  0  0  0  0
   -5.6569   -2.3493    2.1586 H   0  0  0  0  0  0  0  0  0  0  0  0
   -7.0952   -1.2741    2.0168 H   0  0  0  0  0  0  0  0  0  0  0  0
    2.8500   -1.6053    0.5369 C   0  0  0  0  0  0  0  0  0  0  0  0
    2.8541   -1.5403    1.6295 H   0  0  0  0  0  0  0  0  0  0  0  0
    2.8317   -2.6746    0.2947 H   0  0  0  0  0  0  0  0  0  0  0  0
    1.6578   -0.8830   -0.0342 C   0  0  0  0  0  0  0  0  0  0  0  0
    0.8304   -1.5318   -0.8912 C   0  0  0  0  0  0  0  0  0  0  0  0
    1.0201   -2.5593   -1.1810 H   0  0  0  0  0  0  0  0  0  0  0  0
   -0.0436   -1.0664   -1.3288 H   0  0  0  0  0  0  0  0  0  0  0  0
    1.4513    0.5401    0.4328 C   0  0  0  0  0  0  0  0  0  0  0  0
    2.2262    1.1925    0.0153 H   0  0  0  0  0  0  0  0  0  0  0  0
    1.5387    0.5982    1.5231 H   0  0  0  0  0  0  0  0  0  0  0  0
  1  6  1  6  0  0  0
  2 11  1  0  0  0  0
  2  1  1  0  0  0  0
  3  4  2  0  0  0  0
  3  2  1  0  0  0  0
  4  5  1  0  0  0  0
  5 42  1  0  0  0  0
  5  1  1  0  0  0  0
  6  9  1  0  0  0  0
  6 10  1  0  0  0  0
  7  3  1  0  0  0  0
  8  4  1  0  0  0  0
 11 14  1  0  0  0  0
 11 13  1  0  0  0  0
 12 11  1  0  0  0  0
 15 29  1  0  0  0  0
 15 28  1  0  0  0  0
 16 15  1  6  0  0  0
 17 49  1  0  0  0  0
 17 16  1  0  0  0  0
 18 17  1  0  0  0  0
 19 18  2  0  0  0  0
 19 20  1  0  0  0  0
 20 21  1  0  0  0  0
 20 16  1  0  0  0  0
 21 32  1  0  0  0  0
 22 21  1  0  0  0  0
 22 27  2  0  0  0  0
 23 22  1  0  0  0  0
 24 23  1  0  0  0  0
 24 25  2  0  0  0  0
 25 26  1  0  0  0  0
 26 27  1  0  0  0  0
 26 38  1  0  0  0  0
 27 37  1  0  0  0  0
 30 18  1  0  0  0  0
 31 19  1  0  0  0  0
 33 21  1  0  0  0  0
 34 23  1  0  0  0  0
 35 24  1  0  0  0  0
 36 25  1  0  0  0  0
 38 41  1  0  0  0  0
 38 40  1  0  0  0  0
 39 38  1  0  0  0  0
 42 43  1  0  0  0  0
 44 42  1  0  0  0  0
 45 49  1  0  0  0  0
 45 42  1  0  0  0  0
 46 45  2  0  0  0  0
 47 46  1  0  0  0  0
 48 46  1  0  0  0  0
 49 51  1  0  0  0  0
 50 49  1  0  0  0  0
M  END
>  <energy_and_gap>
-15.314 45.477

$$$$
BEA_34/Syn010223/Syn010223.car
 OpenBabel12061810373D

 47 49  0  0  1  0  0  0  0  0999 V2000
   -4.6678    0.0427   -0.5617 C   0  0  1  0  0  0  0  0  0  0  0  0
   -5.6214   -0.8733   -0.6163 N   0  0  0  0  0  0  0  0  0  0  0  0
   -5.6359   -1.5044    0.5773 C   0  0  0  0  0  0  0  0  0  0  0  0
   -4.6318   -0.9165    1.3629 C   0  0  0  0  0  0  0  0  0  0  0  0
   -4.0484    0.0457    0.6098 N   0  0  0  0  0  0  0  0  0  0  0  0
   -4.3610    0.8904   -1.6066 N   0  0  0  0  0  0  0  0  0  0  0  0
   -6.3611   -2.2942    0.7184 H   0  0  0  0  0  0  0  0  0  0  0  0
   -4.2577   -1.0647    2.3668 H   0  0  0  0  0  0  0  0  0  0  0  0
   -3.6383    1.5963   -1.5201 H   0  0  0  0  0  0  0  0  0  0  0  0
   -4.8635    0.8350   -2.4867 H   0  0  0  0  0  0  0  0  0  0  0  0
   -6.5288   -1.2026   -1.7151 C   0  0  0  0  0  0  0  0  0  0  0  0
   -5.9274   -1.5122   -2.5759 H   0  0  0  0  0  0  0  0  0  0  0  0
   -7.1959   -2.0172   -1.4150 H   0  0  0  0  0  0  0  0  0  0  0  0
   -7.1157   -0.3102   -1.9549 H   0  0  0  0  0  0  0  0  0  0  0  0
    2.5137    1.4088    0.1116 N   0  0  0  0  0  0  0  0  0  0  0  0
    1.2015    1.6108    0.0447 C   0  0  2  0  0  0  0  0  0  0  0  0
    0.5392    0.4973   -0.2200 N   0  0  0  0  0  0  0  0  0  0  0  0
    2.7304    0.0865   -0.1586 C   0  0  0  0  0  0  0  0  0  0  0  0
    1.4552   -0.4861   -0.3433 C   0  0  0  0  0  0  0  0  0  0  0  0
    4.0629   -0.5079   -0.2025 C   0  0  0  0  0  0  0  0  0  0  0  0
    0.5826    2.8345    0.2227 N   0  0  0  0  0  0  0  0  0  0  0  0
    4.3596   -1.6427    0.5939 C   0  0  0  0  0  0  0  0  0  0  0  0
    5.0671    0.0030   -1.0657 C   0  0  0  0  0  0  0  0  0  0  0  0
    6.3407   -0.5954   -1.1121 C   0  0  0  0  0  0  0  0  0  0  0  0
    5.6353   -2.2366    0.5432 C   0  0  0  0  0  0  0  0  0  0  0  0
    6.6255   -1.7128   -0.3071 C   0  0  0  0  0  0  0  0  0  0  0  0
    1.0875   -1.4804   -0.5595 H   0  0  0  0  0  0  0  0  0  0  0  0
   -0.4279    2.9187    0.1976 H   0  0  0  0  0  0  0  0  0  0  0  0
    1.1181    3.6836    0.3691 H   0  0  0  0  0  0  0  0  0  0  0  0
    3.6124   -2.0661    1.2584 H   0  0  0  0  0  0  0  0  0  0  0  0
    4.8677    0.8581   -1.7044 H   0  0  0  0  0  0  0  0  0  0  0  0
    7.1032   -0.1959   -1.7722 H   0  0  0  0  0  0  0  0  0  0  0  0
    5.8552   -3.1010    1.1607 H   0  0  0  0  0  0  0  0  0  0  0  0
    7.6074   -2.1726   -0.3447 H   0  0  0  0  0  0  0  0  0  0  0  0
    3.4950    2.4500    0.4436 C   0  0  0  0  0  0  0  0  0  0  0  0
    3.0999    3.0760    1.2497 H   0  0  0  0  0  0  0  0  0  0  0  0
    3.6803    3.0458   -0.4559 H   0  0  0  0  0  0  0  0  0  0  0  0
    4.4222    1.9902    0.7958 H   0  0  0  0  0  0  0  0  0  0  0  0
   -2.9464    0.8583    1.1396 C   0  0  0  0  0  0  0  0  0  0  0  0
   -3.1564    1.0622    2.1964 H   0  0  0  0  0  0  0  0  0  0  0  0
   -2.9641    1.8279    0.6321 H   0  0  0  0  0  0  0  0  0  0  0  0
   -1.6137    0.1804    0.9495 C   0  0  1  0  0  0  0  0  0  0  0  0
   -1.1141   -0.5557    1.8752 N   0  0  0  0  0  0  0  0  0  0  0  0
   -1.6850   -0.5507    2.7292 H   0  0  0  0  0  0  0  0  0  0  0  0
   -0.8998    0.2432   -0.3720 C   0  0  0  0  0  0  0  0  0  0  0  0
   -1.2954    1.0488   -0.9990 H   0  0  0  0  0  0  0  0  0  0  0  0
   -1.0375   -0.6917   -0.9272 H   0  0  0  0  0  0  0  0  0  0  0  0
  1  6  1  6  0  0  0
  1  5  1  0  0  0  0
  2  1  1  0  0  0  0
  2  3  1  0  0  0  0
  3  7  1  0  0  0  0
  3  4  2  0  0  0  0
  4  8  1  0  0  0  0
  5 39  1  0  0  0  0
  5  4  1  0  0  0  0
  6  9  1  0  0  0  0
 10  6  1  0  0  0  0
 11 13  1  0  0  0  0
 11  2  1  0  0  0  0
 12 11  1  0  0  0  0
 14 11  1  0  0  0  0
 15 35  1  0  0  0  0
 16 15  1  0  0  0  0
 16 21  1  6  0  0  0
 17 16  1  0  0  0  0
 18 15  1  0  0  0  0
 19 17  1  0  0  0  0
 19 18  2  0  0  0  0
 20 18  1  0  0  0  0
 20 22  2  0  0  0  0
 21 29  1  0  0  0  0
 22 30  1  0  0  0  0
 23 20  1  0  0  0  0
 24 23  2  0  0  0  0
 24 26  1  0  0  0  0
 25 22  1  0  0  0  0
 25 33  1  0  0  0  0
 26 25  2  0  0  0  0
 27 19  1  0  0  0  0
 28 21  1  0  0  0  0
 31 23  1  0  0  0  0
 32 24  1  0  0  0  0
 34 26  1  0  0  0  0
 35 38  1  0  0  0  0
 35 36  1  0  0  0  0
 37 35  1  0  0  0  0
 39 40  1  0  0  0  0
 41 39  1  0  0  0  0
 42 45  1  6  0  0  0
 42 39  1  0  0  0  0
 42 43  1  0  0  0  0
 43 44  1  0  0  0  0
 45 17  1  0  0  0  0
 46 45  1  0  0  0  0
 47 45  1  0  0  0  0
M  RAD  2  42   2  43   2
M  END
>  <energy_and_gap>
-15.039 39.418

$$$$
BEA_34/Syn004118/Syn004118.car
 OpenBabel12061810373D

 50 52  0  0  1  0  0  0  0  0999 V2000
   -2.3156    1.2271   -0.6633 C   0  0  2  0  0  0  0  0  0  0  0  0
   -2.6995    2.4833   -0.5055 N   0  0  0  0  0  0  0  0  0  0  0  0
   -3.9607    2.4555   -0.0229 C   0  0  0  0  0  0  0  0  0  0  0  0
   -4.3210    1.1040    0.1038 C   0  0  0  0  0  0  0  0  0  0  0  0
   -3.2605    0.3700   -0.3070 N   0  0  0  0  0  0  0  0  0  0  0  0
   -1.0746    0.8572   -1.1408 N   0  0  0  0  0  0  0  0  0  0  0  0
   -4.4444    3.4032    0.1715 H   0  0  0  0  0  0  0  0  0  0  0  0
   -5.2000    0.5709    0.4400 H   0  0  0  0  0  0  0  0  0  0  0  0
   -0.3874    1.5567   -1.4024 H   0  0  0  0  0  0  0  0  0  0  0  0
   -0.8301   -0.1184   -1.2643 H   0  0  0  0  0  0  0  0  0  0  0  0
   -1.9623    3.7172   -0.7757 C   0  0  0  0  0  0  0  0  0  0  0  0
   -1.0716    3.7309   -0.1398 H   0  0  0  0  0  0  0  0  0  0  0  0
   -2.5934    4.5833   -0.5516 H   0  0  0  0  0  0  0  0  0  0  0  0
   -1.6819    3.7257   -1.8338 H   0  0  0  0  0  0  0  0  0  0  0  0
    2.9391    0.3620    0.7077 C   0  0  0  0  0  0  0  0  0  0  0  0
    1.8840    1.1686    1.2131 C   0  0  0  0  0  0  0  0  0  0  0  0
    1.8941    2.5521    0.9735 C   0  0  0  0  0  0  0  0  0  0  0  0
    2.9494    3.1131    0.2418 C   0  0  0  0  0  0  0  0  0  0  0  0
    3.9617    2.2566   -0.2174 C   0  0  0  0  0  0  0  0  0  0  0  0
    3.9863    0.9072   -0.0049 N   0  0  0  0  0  0  0  0  0  0  0  0
    2.8859   -1.1292    0.9809 C   0  0  0  0  0  0  0  0  0  0  0  0
    0.5458   -2.1197    0.7475 C   0  0  0  0  0  0  0  0  0  0  0  0
    1.8212   -1.8536    0.1931 C   0  0  0  0  0  0  0  0  0  0  0  0
    2.0419   -2.2800   -1.1388 C   0  0  0  0  0  0  0  0  0  0  0  0
    1.0171   -2.9384   -1.8415 C   0  0  0  0  0  0  0  0  0  0  0  0
   -0.2116   -3.1421   -1.1912 C   0  0  0  0  0  0  0  0  0  0  0  0
   -0.4724   -2.7337    0.0819 N   0  0  0  0  0  0  0  0  0  0  0  0
    1.0696    0.7359    1.7849 H   0  0  0  0  0  0  0  0  0  0  0  0
    1.0956    3.1808    1.3527 H   0  0  0  0  0  0  0  0  0  0  0  0
    2.9859    4.1787    0.0417 H   0  0  0  0  0  0  0  0  0  0  0  0
    4.7855    2.6876   -0.7786 H   0  0  0  0  0  0  0  0  0  0  0  0
    2.7206   -1.2850    2.0530 H   0  0  0  0  0  0  0  0  0  0  0  0
    3.8499   -1.6063    0.7840 H   0  0  0  0  0  0  0  0  0  0  0  0
    0.3290   -1.8166    1.7681 H   0  0  0  0  0  0  0  0  0  0  0  0
    2.9964   -2.1120   -1.6261 H   0  0  0  0  0  0  0  0  0  0  0  0
    1.1704   -3.2791   -2.8600 H   0  0  0  0  0  0  0  0  0  0  0  0
   -1.0163   -3.6463   -1.7177 H   0  0  0  0  0  0  0  0  0  0  0  0
    5.1363    0.1749   -0.5493 C   0  0  0  0  0  0  0  0  0  0  0  0
    4.7664   -0.5969   -1.2300 H   0  0  0  0  0  0  0  0  0  0  0  0
    5.6838   -0.2741    0.2855 H   0  0  0  0  0  0  0  0  0  0  0  0
    5.8048    0.8451   -1.0996 H   0  0  0  0  0  0  0  0  0  0  0  0
   -3.2793   -1.0996   -0.3041 C   0  0  0  0  0  0  0  0  0  0  0  0
   -4.3223   -1.4358   -0.3170 H   0  0  0  0  0  0  0  0  0  0  0  0
   -2.8289   -1.4229   -1.2484 H   0  0  0  0  0  0  0  0  0  0  0  0
   -2.5554   -1.6922    0.8748 C   0  0  1  0  0  0  0  0  0  0  0  0
   -2.7141   -1.1471    2.0271 N   0  0  0  0  0  0  0  0  0  0  0  0
   -2.2237   -1.6558    2.7730 H   0  0  0  0  0  0  0  0  0  0  0  0
   -1.7674   -2.9707    0.7268 C   0  0  0  0  0  0  0  0  0  0  0  0
   -1.5650   -3.4533    1.6904 H   0  0  0  0  0  0  0  0  0  0  0  0
   -2.3310   -3.6942    0.1271 H   0  0  0  0  0  0  0  0  0  0  0  0
  1  6  1  1  0  0  0
  1  2  1  0  0  0  0
  1  5  1  0  0  0  0
  2  3  1  0  0  0  0
  3  4  2  0  0  0  0
  3  7  1  0  0  0  0
  4  8  1  0  0  0  0
  5 42  1  0  0  0  0
  5  4  1  0  0  0  0
  9  6  1  0  0  0  0
 10  6  1  0  0  0  0
 11 13  1  0  0  0  0
 11  2  1  0  0  0  0
 11 12  1  0  0  0  0
 14 11  1  0  0  0  0
 15 21  1  0  0  0  0
 15 16  2  0  0  0  0
 16 28  1  0  0  0  0
 17 16  1  0  0  0  0
 17 29  1  0  0  0  0
 18 17  1  0  0  0  0
 19 20  1  0  0  0  0
 19 18  2  0  0  0  0
 20 15  1  0  0  0  0
 21 32  1  0  0  0  0
 22 34  1  0  0  0  0
 23 22  2  0  0  0  0
 23 21  1  0  0  0  0
 24 23  1  0  0  0  0
 25 26  2  0  0  0  0
 25 24  1  0  0  0  0
 26 27  1  0  0  0  0
 27 48  1  0  0  0  0
 27 22  1  0  0  0  0
 30 18  1  0  0  0  0
 31 19  1  0  0  0  0
 33 21  1  0  0  0  0
 35 24  1  0  0  0  0
 36 25  1  0  0  0  0
 37 26  1  0  0  0  0
 38 20  1  0  0  0  0
 38 40  1  0  0  0  0
 39 38  1  0  0  0  0
 41 38  1  0  0  0  0
 43 42  1  0  0  0  0
 44 42  1  0  0  0  0
 45 42  1  1  0  0  0
 45 46  1  0  0  0  0
 46 47  1  0  0  0  0
 48 45  1  0  0  0  0
 48 49  1  0  0  0  0
 50 48  1  0  0  0  0
M  RAD  2  45   2  46   2
M  END
>  <energy_and_gap>
-15.088 39.002

$$$$
BEA_34/Syn016398/Syn016398.car
 OpenBabel12061810373D

 52 55  0  0  1  0  0  0  0  0999 V2000
   -1.6848    2.3554    0.0455 C   0  0  2  0  0  0  0  0  0  0  0  0
   -2.5036    1.9345   -0.9044 N   0  0  0  0  0  0  0  0  0  0  0  0
   -1.7495    1.6805   -1.9952 C   0  0  0  0  0  0  0  0  0  0  0  0
   -0.4179    1.9607   -1.6470 C   0  0  0  0  0  0  0  0  0  0  0  0
   -0.4221    2.3755   -0.3581 N   0  0  0  0  0  0  0  0  0  0  0  0
   -2.0989    2.7269    1.3078 N   0  0  0  0  0  0  0  0  0  0  0  0
   -2.2561    1.3286   -2.8836 H   0  0  0  0  0  0  0  0  0  0  0  0
    0.5336    1.9159   -2.1591 H   0  0  0  0  0  0  0  0  0  0  0  0
   -3.0770    2.6696    1.5727 H   0  0  0  0  0  0  0  0  0  0  0  0
   -1.4441    3.0873    1.9936 H   0  0  0  0  0  0  0  0  0  0  0  0
   -3.9545    1.7558   -0.8678 C   0  0  0  0  0  0  0  0  0  0  0  0
   -4.2027    1.1126   -0.0176 H   0  0  0  0  0  0  0  0  0  0  0  0
   -4.4170    2.7413   -0.7535 H   0  0  0  0  0  0  0  0  0  0  0  0
   -4.2942    1.2862   -1.7966 H   0  0  0  0  0  0  0  0  0  0  0  0
    1.0271   -0.6466    0.6670 C   0  0  2  0  0  0  0  0  0  0  0  0
    1.8070   -1.5756    0.1305 N   0  0  0  0  0  0  0  0  0  0  0  0
    1.7256    0.4702    0.8244 N   0  0  0  0  0  0  0  0  0  0  0  0
   -0.3086   -0.7908    1.0268 N   0  0  0  0  0  0  0  0  0  0  0  0
    2.9691   -1.0359   -0.0986 C   0  0  0  0  0  0  0  0  0  0  0  0
    2.9205    0.2605    0.3459 C   0  0  0  0  0  0  0  0  0  0  0  0
   -1.4192   -1.4155    0.3767 C   0  0  0  0  0  0  0  0  0  0  0  0
   -2.6470   -1.6536    1.0768 C   0  0  0  0  0  0  0  0  0  0  0  0
   -2.7975   -1.3747    2.4549 N   0  0  0  0  0  0  0  0  0  0  0  0
    4.1209   -1.5825   -0.6766 C   0  0  0  0  0  0  0  0  0  0  0  0
    4.0212    1.1203    0.2489 C   0  0  0  0  0  0  0  0  0  0  0  0
   -1.3526   -1.7379   -1.0069 C   0  0  0  0  0  0  0  0  0  0  0  0
   -3.7556   -2.2012    0.3869 C   0  0  0  0  0  0  0  0  0  0  0  0
    5.1942    0.5948   -0.3302 C   0  0  0  0  0  0  0  0  0  0  0  0
    5.2429   -0.7364   -0.7861 C   0  0  0  0  0  0  0  0  0  0  0  0
   -2.4621   -2.2867   -1.6723 C   0  0  0  0  0  0  0  0  0  0  0  0
   -3.6603   -2.5164   -0.9787 C   0  0  0  0  0  0  0  0  0  0  0  0
   -0.5191   -0.2531    1.8591 H   0  0  0  0  0  0  0  0  0  0  0  0
   -3.7088   -1.4611    2.8970 H   0  0  0  0  0  0  0  0  0  0  0  0
   -2.0043   -1.1646    3.0516 H   0  0  0  0  0  0  0  0  0  0  0  0
    4.1682   -2.6061   -1.0337 H   0  0  0  0  0  0  0  0  0  0  0  0
    3.9948    2.1482    0.5943 H   0  0  0  0  0  0  0  0  0  0  0  0
   -0.4566   -1.5476   -1.5877 H   0  0  0  0  0  0  0  0  0  0  0  0
   -4.6924   -2.3909    0.9020 H   0  0  0  0  0  0  0  0  0  0  0  0
    6.0720    1.2252   -0.4265 H   0  0  0  0  0  0  0  0  0  0  0  0
    6.1574   -1.1170   -1.2286 H   0  0  0  0  0  0  0  0  0  0  0  0
   -2.3955   -2.5262   -2.7282 H   0  0  0  0  0  0  0  0  0  0  0  0
   -4.5145   -2.9379   -1.4977 H   0  0  0  0  0  0  0  0  0  0  0  0
    1.5371   -2.9990   -0.1161 C   0  0  0  0  0  0  0  0  0  0  0  0
    0.6532   -3.3111    0.4466 H   0  0  0  0  0  0  0  0  0  0  0  0
    2.3879   -3.5941    0.2320 H   0  0  0  0  0  0  0  0  0  0  0  0
    1.3817   -3.1436   -1.1901 H   0  0  0  0  0  0  0  0  0  0  0  0
    2.1204    2.1742    1.9662 H   0  0  0  0  0  0  0  0  0  0  0  0
    1.2828    1.7580    1.3971 C   0  0  0  0  0  0  0  0  0  0  0  0
    0.4976    1.5569    2.1301 H   0  0  0  0  0  0  0  0  0  0  0  0
    0.8072    2.7758    0.3409 C   0  0  0  0  0  0  0  0  0  0  0  0
    0.5976    3.7390    0.8175 H   0  0  0  0  0  0  0  0  0  0  0  0
    1.5854    2.9516   -0.4097 H   0  0  0  0  0  0  0  0  0  0  0  0
  1  6  1  1  0  0  0
  2 11  1  0  0  0  0
  2  1  1  0  0  0  0
  3  4  2  0  0  0  0
  3  2  1  0  0  0  0
  4  5  1  0  0  0  0
  5  1  1  0  0  0  0
  5 50  1  0  0  0  0
  6  9  1  0  0  0  0
  6 10  1  0  0  0  0
  7  3  1  0  0  0  0
  8  4  1  0  0  0  0
 11 13  1  0  0  0  0
 11 12  1  0  0  0  0
 14 11  1  0  0  0  0
 15 17  1  0  0  0  0
 15 18  1  1  0  0  0
 16 15  1  0  0  0  0
 17 48  1  0  0  0  0
 18 32  1  0  0  0  0
 19 16  1  0  0  0  0
 19 20  2  0  0  0  0
 20 17  1  0  0  0  0
 21 18  1  0  0  0  0
 21 22  2  0  0  0  0
 22 23  1  0  0  0  0
 23 33  1  0  0  0  0
 23 34  1  0  0  0  0
 24 19  1  0  0  0  0
 25 20  1  0  0  0  0
 25 36  1  0  0  0  0
 26 21  1  0  0  0  0
 27 38  1  0  0  0  0
 27 22  1  0  0  0  0
 28 25  2  0  0  0  0
 29 24  2  0  0  0  0
 29 28  1  0  0  0  0
 30 26  2  0  0  0  0
 30 31  1  0  0  0  0
 31 27  2  0  0  0  0
 35 24  1  0  0  0  0
 37 26  1  0  0  0  0
 39 28  1  0  0  0  0
 40 29  1  0  0  0  0
 41 30  1  0  0  0  0
 42 31  1  0  0  0  0
 43 16  1  0  0  0  0
 43 45  1  0  0  0  0
 43 44  1  0  0  0  0
 46 43  1  0  0  0  0
 48 47  1  0  0  0  0
 48 49  1  0  0  0  0
 50 51  1  0  0  0  0
 50 48  1  0  0  0  0
 52 50  1  0  0  0  0
M  END
>  <energy_and_gap>
-15.666 33.350

$$$$
BEA_34/Syn015057/Syn015057.car
 OpenBabel12061810373D

 52 54  0  0  1  0  0  0  0  0999 V2000
   -4.1163    1.0417    0.1785 C   0  0  2  0  0  0  0  0  0  0  0  0
   -5.2339    1.6769   -0.1347 N   0  0  0  0  0  0  0  0  0  0  0  0
   -6.2585    0.8497    0.1655 C   0  0  0  0  0  0  0  0  0  0  0  0
   -5.6955   -0.3290    0.6811 C   0  0  0  0  0  0  0  0  0  0  0  0
   -4.3520   -0.1655    0.6698 N   0  0  0  0  0  0  0  0  0  0  0  0
   -2.8551    1.5770    0.0121 N   0  0  0  0  0  0  0  0  0  0  0  0
   -7.2621    1.2041   -0.0271 H   0  0  0  0  0  0  0  0  0  0  0  0
   -6.0832   -1.2685    1.0513 H   0  0  0  0  0  0  0  0  0  0  0  0
   -2.0267    1.0643    0.2910 H   0  0  0  0  0  0  0  0  0  0  0  0
   -2.7302    2.5037   -0.3827 H   0  0  0  0  0  0  0  0  0  0  0  0
   -5.4112    3.0141   -0.6997 C   0  0  0  0  0  0  0  0  0  0  0  0
   -4.9047    3.0469   -1.6696 H   0  0  0  0  0  0  0  0  0  0  0  0
   -4.9704    3.7401   -0.0089 H   0  0  0  0  0  0  0  0  0  0  0  0
   -6.4778    3.2240   -0.8294 H   0  0  0  0  0  0  0  0  0  0  0  0
   -0.4721   -1.0738   -2.3183 N   0  0  0  0  0  0  0  0  0  0  0  0
    0.0544   -0.7876   -1.0395 C   0  0  0  0  0  0  0  0  0  0  0  0
    1.0479    0.2200   -0.9659 C   0  0  0  0  0  0  0  0  0  0  0  0
    1.6126    0.5482    0.2874 C   0  0  2  0  0  0  0  0  0  0  0  0
    2.6807    1.6059    0.4045 C   0  0  0  0  0  0  0  0  0  0  0  0
    4.0790    1.0671    0.2391 C   0  0  2  0  0  0  0  0  0  0  0  0
    4.6885    1.0030   -1.0378 C   0  0  0  0  0  0  0  0  0  0  0  0
    5.9918    0.4827   -1.1381 C   0  0  0  0  0  0  0  0  0  0  0  0
    6.7094    0.0301   -0.0764 N   0  0  0  0  0  0  0  0  0  0  0  0
    6.1111    0.0926    1.1430 C   0  0  0  0  0  0  0  0  0  0  0  0
    4.8135    0.5939    1.3538 C   0  0  0  0  0  0  0  0  0  0  0  0
    1.1645   -0.1591    1.4231 C   0  0  0  0  0  0  0  0  0  0  0  0
    0.1754   -1.1416    1.2583 C   0  0  0  0  0  0  0  0  0  0  0  0
   -0.4019   -1.4719    0.0637 N   0  0  0  0  0  0  0  0  0  0  0  0
   -1.1731   -1.7941   -2.4451 H   0  0  0  0  0  0  0  0  0  0  0  0
   -0.1522   -0.5666   -3.1392 H   0  0  0  0  0  0  0  0  0  0  0  0
    1.3791    0.7409   -1.8601 H   0  0  0  0  0  0  0  0  0  0  0  0
    2.5002    2.3945   -0.3351 H   0  0  0  0  0  0  0  0  0  0  0  0
    2.5939    2.1114    1.3732 H   0  0  0  0  0  0  0  0  0  0  0  0
    4.1706    1.3476   -1.9271 H   0  0  0  0  0  0  0  0  0  0  0  0
    6.4733    0.4296   -2.1098 H   0  0  0  0  0  0  0  0  0  0  0  0
    6.6883   -0.2716    1.9879 H   0  0  0  0  0  0  0  0  0  0  0  0
    4.3945    0.6152    2.3547 H   0  0  0  0  0  0  0  0  0  0  0  0
    1.5693    0.0455    2.4093 H   0  0  0  0  0  0  0  0  0  0  0  0
   -0.1652   -1.6778    2.1393 H   0  0  0  0  0  0  0  0  0  0  0  0
    8.0638   -0.5078   -0.1932 C   0  0  0  0  0  0  0  0  0  0  0  0
    8.3854   -0.4764   -1.2392 H   0  0  0  0  0  0  0  0  0  0  0  0
    8.7341    0.1052    0.4185 H   0  0  0  0  0  0  0  0  0  0  0  0
    8.0566   -1.5440    0.1611 H   0  0  0  0  0  0  0  0  0  0  0  0
   -1.4161   -2.5417    0.1110 C   0  0  0  0  0  0  0  0  0  0  0  0
   -1.3056   -3.1111    1.0408 H   0  0  0  0  0  0  0  0  0  0  0  0
   -1.1746   -3.2437   -0.6948 H   0  0  0  0  0  0  0  0  0  0  0  0
   -2.8238   -2.0014    0.0079 C   0  0  1  0  0  0  0  0  0  0  0  0
   -3.5959   -2.3688   -0.9507 N   0  0  0  0  0  0  0  0  0  0  0  0
   -3.1260   -2.9887   -1.6215 H   0  0  0  0  0  0  0  0  0  0  0  0
   -3.4317   -1.2116    1.1368 C   0  0  0  0  0  0  0  0  0  0  0  0
   -2.6644   -0.7104    1.7346 H   0  0  0  0  0  0  0  0  0  0  0  0
   -3.9770   -1.8777    1.8151 H   0  0  0  0  0  0  0  0  0  0  0  0
  1  6  1  1  0  0  0
  1  5  1  0  0  0  0
  2  3  1  0  0  0  0
  2  1  1  0  0  0  0
  3  4  2  0  0  0  0
  4  8  1  0  0  0  0
  5  4  1  0  0  0  0
  5 50  1  0  0  0  0
  6  9  1  0  0  0  0
  7  3  1  0  0  0  0
 10  6  1  0  0  0  0
 11  2  1  0  0  0  0
 11 13  1  0  0  0  0
 12 11  1  0  0  0  0
 14 11  1  0  0  0  0
 15 16  1  0  0  0  0
 16 17  2  0  0  0  0
 16 28  1  0  0  0  0
 17 18  1  0  0  0  0
 18 19  1  6  0  0  0
 18 26  1  0  0  0  0
 19 33  1  0  0  0  0
 20 19  1  6  0  0  0
 20 25  1  0  0  0  0
 21 20  1  0  0  0  0
 22 21  2  0  0  0  0
 22 23  1  0  0  0  0
 23 24  1  0  0  0  0
 24 25  2  0  0  0  0
 24 36  1  0  0  0  0
 25 37  1  0  0  0  0
 26 38  1  0  0  0  0
 27 26  2  0  0  0  0
 27 39  1  0  0  0  0
 28 44  1  0  0  0  0
 28 27  1  0  0  0  0
 29 15  1  0  0  0  0
 30 15  1  0  0  0  0
 31 17  1  0  0  0  0
 32 19  1  0  0  0  0
 34 21  1  0  0  0  0
 35 22  1  0  0  0  0
 40 23  1  0  0  0  0
 40 43  1  0  0  0  0
 40 42  1  0  0  0  0
 41 40  1  0  0  0  0
 44 45  1  0  0  0  0
 46 44  1  0  0  0  0
 47 48  1  1  0  0  0
 47 44  1  0  0  0  0
 47 50  1  0  0  0  0
 49 48  1  0  0  0  0
 50 51  1  0  0  0  0
 50 52  1  0  0  0  0
M  RAD  2  47   2  48   2
M  END
>  <energy_and_gap>
-15.153 20.133

$$$$
BEA_34/Syn007099/Syn007099.car
 OpenBabel12061810373D

 42 45  0  0  1  0  0  0  0  0999 V2000
    1.7259    0.4778    1.5050 N   0  0  0  0  0  0  0  0  0  0  0  0
    2.5362    1.4785    1.7427 C   0  0  0  0  0  0  0  0  0  0  0  0
    3.6474    1.5420    0.9089 C   0  0  0  0  0  0  0  0  0  0  0  0
    3.3835    0.4637    0.1581 N   0  0  0  0  0  0  0  0  0  0  0  0
    3.9813   -0.1503   -0.8668 C   0  0  0  0  0  0  0  0  0  0  0  0
    3.1208   -1.2361   -1.1529 C   0  0  0  0  0  0  0  0  0  0  0  0
    2.0692   -1.1770   -0.2735 N   0  0  0  0  0  0  0  0  0  0  0  0
    2.2891   -0.1264    0.5084 C   0  0  2  0  0  0  0  0  0  0  0  0
    2.3105    2.1731    2.5419 H   0  0  0  0  0  0  0  0  0  0  0  0
    4.5310    2.1411    0.7348 H   0  0  0  0  0  0  0  0  0  0  0  0
    4.9110    0.2556   -1.2423 H   0  0  0  0  0  0  0  0  0  0  0  0
    3.1207   -2.0430   -1.8734 H   0  0  0  0  0  0  0  0  0  0  0  0
    0.5235    0.2840    2.3111 C   0  0  0  0  0  0  0  0  0  0  0  0
    0.7790    0.4115    3.3686 H   0  0  0  0  0  0  0  0  0  0  0  0
    0.1408   -0.7259    2.1541 H   0  0  0  0  0  0  0  0  0  0  0  0
   -0.2197    1.0264    2.0041 H   0  0  0  0  0  0  0  0  0  0  0  0
   -1.9219   -0.3856   -0.3324 C   0  0  0  0  0  0  0  0  0  0  0  0
   -1.3330    1.4358   -1.3528 N   0  0  0  0  0  0  0  0  0  0  0  0
   -0.8869   -0.6683   -1.0817 N   0  0  0  0  0  0  0  0  0  0  0  0
   -0.5539    0.4465   -1.6924 C   0  0  0  0  0  0  0  0  0  0  0  0
   -2.1970    0.9573   -0.5136 C   0  0  0  0  0  0  0  0  0  0  0  0
   -2.6994   -1.1769    0.5384 C   0  0  0  0  0  0  0  0  0  0  0  0
   -2.4735   -2.5485    0.7857 N   0  0  0  0  0  0  0  0  0  0  0  0
   -4.0331    0.8400    1.0064 C   0  0  0  0  0  0  0  0  0  0  0  0
   -3.2438    1.6133    0.1357 C   0  0  0  0  0  0  0  0  0  0  0  0
   -3.7692   -0.5275    1.2061 C   0  0  0  0  0  0  0  0  0  0  0  0
    0.2678    0.5453   -2.3921 H   0  0  0  0  0  0  0  0  0  0  0  0
   -1.7033   -3.0533    0.3658 H   0  0  0  0  0  0  0  0  0  0  0  0
   -3.0879   -3.0617    1.4125 H   0  0  0  0  0  0  0  0  0  0  0  0
   -4.8586    1.3067    1.5331 H   0  0  0  0  0  0  0  0  0  0  0  0
   -3.4517    2.6680   -0.0135 H   0  0  0  0  0  0  0  0  0  0  0  0
   -4.4055   -1.0813    1.8902 H   0  0  0  0  0  0  0  0  0  0  0  0
   -1.1922    2.7972   -1.8685 C   0  0  0  0  0  0  0  0  0  0  0  0
   -2.1175    3.0663   -2.3886 H   0  0  0  0  0  0  0  0  0  0  0  0
   -0.3471    2.8454   -2.5635 H   0  0  0  0  0  0  0  0  0  0  0  0
   -1.0165    3.4695   -1.0224 H   0  0  0  0  0  0  0  0  0  0  0  0
    1.4435   -3.1387   -0.5053 H   0  0  0  0  0  0  0  0  0  0  0  0
    0.9851   -2.1631   -0.3107 C   0  0  0  0  0  0  0  0  0  0  0  0
    0.5445   -2.2108    0.6872 H   0  0  0  0  0  0  0  0  0  0  0  0
   -0.0749   -1.8561   -1.3871 C   0  0  0  0  0  0  0  0  0  0  0  0
    0.3963   -1.7200   -2.3678 H   0  0  0  0  0  0  0  0  0  0  0  0
   -0.7668   -2.6952   -1.4983 H   0  0  0  0  0  0  0  0  0  0  0  0
  1  2  1  0  0  0  0
  1 13  1  0  0  0  0
  2  9  1  0  0  0  0
  3  2  2  0  0  0  0
  4  8  1  0  0  0  0
  4  3  1  0  0  0  0
  5  4  1  0  0  0  0
  6  5  2  0  0  0  0
  6  7  1  0  0  0  0
  8  7  1  6  0  0  0
  8  1  1  0  0  0  0
 10  3  1  0  0  0  0
 11  5  1  0  0  0  0
 12  6  1  0  0  0  0
 13 14  1  0  0  0  0
 15 13  1  0  0  0  0
 16 13  1  0  0  0  0
 17 22  1  0  0  0  0
 18 21  1  0  0  0  0
 19 17  1  0  0  0  0
 20 18  1  0  0  0  0
 20 19  1  0  0  0  0
 21 17  2  0  0  0  0
 21 25  1  0  0  0  0
 22 23  1  0  0  0  0
 22 26  2  0  0  0  0
 23 29  1  0  0  0  0
 24 26  1  0  0  0  0
 24 30  1  0  0  0  0
 25 24  2  0  0  0  0
 26 32  1  0  0  0  0
 27 20  1  0  0  0  0
 28 23  1  0  0  0  0
 31 25  1  0  0  0  0
 33 18  1  0  0  0  0
 33 36  1  0  0  0  0
 34 33  1  0  0  0  0
 35 33  1  0  0  0  0
 37 38  1  0  0  0  0
 38  7  1  0  0  0  0
 38 39  1  0  0  0  0
 40 19  1  0  0  0  0
 40 38  1  0  0  0  0
 41 40  1  0  0  0  0
 42 40  1  0  0  0  0
M  END
>  <energy_and_gap>
-15.016  4.200

$$$$
BEA_34/Syn012245/Syn012245.car
 OpenBabel12061810373D

 52 54  0  0  1  0  0  0  0  0999 V2000
   -3.9407   -0.0695    0.2014 N   0  0  0  0  0  0  0  0  0  0  0  0
   -4.4871    1.0716    0.6101 C   0  0  2  0  0  0  0  0  0  0  0  0
   -5.7869    1.1203    0.3610 N   0  0  0  0  0  0  0  0  0  0  0  0
   -4.9446   -0.7940   -0.3615 C   0  0  0  0  0  0  0  0  0  0  0  0
   -6.1233   -0.0356   -0.2487 C   0  0  0  0  0  0  0  0  0  0  0  0
   -3.7945    2.1015    1.2163 N   0  0  0  0  0  0  0  0  0  0  0  0
   -4.8448   -2.1555   -0.9846 C   0  0  0  0  0  0  0  0  0  0  0  0
   -7.1594   -0.1697   -0.5300 H   0  0  0  0  0  0  0  0  0  0  0  0
   -4.2766    2.9333    1.5410 H   0  0  0  0  0  0  0  0  0  0  0  0
   -2.7858    2.0728    1.3175 H   0  0  0  0  0  0  0  0  0  0  0  0
   -5.2828   -2.1401   -1.9872 H   0  0  0  0  0  0  0  0  0  0  0  0
   -5.3852   -2.8858   -0.3752 H   0  0  0  0  0  0  0  0  0  0  0  0
   -3.8087   -2.4873   -1.0809 H   0  0  0  0  0  0  0  0  0  0  0  0
   -6.7483    2.1841    0.6508 C   0  0  0  0  0  0  0  0  0  0  0  0
   -6.4262    3.0899    0.1271 H   0  0  0  0  0  0  0  0  0  0  0  0
   -7.7449    1.8897    0.3061 H   0  0  0  0  0  0  0  0  0  0  0  0
   -6.7628    2.3482    1.7331 H   0  0  0  0  0  0  0  0  0  0  0  0
    0.3640   -2.6706    1.1127 N   0  0  0  0  0  0  0  0  0  0  0  0
    1.0357   -1.6707    0.4341 C   0  0  2  0  0  0  0  0  0  0  0  0
    0.5558   -1.0772   -0.6464 N   0  0  0  0  0  0  0  0  0  0  0  0
    1.4828   -0.1792   -1.0444 C   0  0  0  0  0  0  0  0  0  0  0  0
    2.5733   -0.2593   -0.1548 C   0  0  0  0  0  0  0  0  0  0  0  0
    2.2290   -1.1963    0.7783 N   0  0  0  0  0  0  0  0  0  0  0  0
    3.8407    0.4639   -0.1251 C   0  0  0  0  0  0  0  0  0  0  0  0
    3.8469    1.8811   -0.1366 C   0  0  0  0  0  0  0  0  0  0  0  0
    5.0620    2.5918   -0.1284 C   0  0  0  0  0  0  0  0  0  0  0  0
    6.2877    1.9030   -0.1177 C   0  0  0  0  0  0  0  0  0  0  0  0
    6.2977    0.4903   -0.1195 C   0  0  0  0  0  0  0  0  0  0  0  0
    7.5248   -0.2037   -0.1160 N   0  0  0  0  0  0  0  0  0  0  0  0
    5.0794   -0.2286   -0.1278 C   0  0  0  0  0  0  0  0  0  0  0  0
   -0.5505   -2.9887    0.8117 H   0  0  0  0  0  0  0  0  0  0  0  0
    0.7768   -3.1370    1.9136 H   0  0  0  0  0  0  0  0  0  0  0  0
    1.2601    0.4060   -1.9268 H   0  0  0  0  0  0  0  0  0  0  0  0
    2.9162    2.4404   -0.1448 H   0  0  0  0  0  0  0  0  0  0  0  0
    5.0534    3.6765   -0.1311 H   0  0  0  0  0  0  0  0  0  0  0  0
    7.2146    2.4686   -0.1116 H   0  0  0  0  0  0  0  0  0  0  0  0
    7.5466   -1.2199   -0.1171 H   0  0  0  0  0  0  0  0  0  0  0  0
    8.4061    0.3031   -0.1112 H   0  0  0  0  0  0  0  0  0  0  0  0
    5.0945   -1.3152   -0.1400 H   0  0  0  0  0  0  0  0  0  0  0  0
    2.9796   -1.6240    1.9664 C   0  0  0  0  0  0  0  0  0  0  0  0
    2.2901   -1.7350    2.8091 H   0  0  0  0  0  0  0  0  0  0  0  0
    3.4703   -2.5755    1.7378 H   0  0  0  0  0  0  0  0  0  0  0  0
    3.7206   -0.8659    2.2332 H   0  0  0  0  0  0  0  0  0  0  0  0
   -2.5413   -0.5104    0.3144 C   0  0  0  0  0  0  0  0  0  0  0  0
   -2.5593   -1.5767    0.5608 H   0  0  0  0  0  0  0  0  0  0  0  0
   -2.0823   -0.0072    1.1711 H   0  0  0  0  0  0  0  0  0  0  0  0
   -1.7465   -0.2553   -0.9365 C   0  0  1  0  0  0  0  0  0  0  0  0
   -1.8868    0.8747   -1.5297 N   0  0  0  0  0  0  0  0  0  0  0  0
   -1.2814    0.9611   -2.3551 H   0  0  0  0  0  0  0  0  0  0  0  0
   -0.6987   -1.2378   -1.3931 C   0  0  0  0  0  0  0  0  0  0  0  0
   -0.4727   -1.1308   -2.4609 H   0  0  0  0  0  0  0  0  0  0  0  0
   -1.0466   -2.2666   -1.2576 H   0  0  0  0  0  0  0  0  0  0  0  0
  1 44  1  0  0  0  0
  1  2  1  0  0  0  0
  2  6  1  6  0  0  0
  3  2  1  0  0  0  0
  3 14  1  0  0  0  0
  4  5  2  0  0  0  0
  4  1  1  0  0  0  0
  5  3  1  0  0  0  0
  6 10  1  0  0  0  0
  6  9  1  0  0  0  0
  7 12  1  0  0  0  0
  7  4  1  0  0  0  0
  8  5  1  0  0  0  0
 11  7  1  0  0  0  0
 13  7  1  0  0  0  0
 14 17  1  0  0  0  0
 15 14  1  0  0  0  0
 16 14  1  0  0  0  0
 18 32  1  0  0  0  0
 19 23  1  0  0  0  0
 19 18  1  6  0  0  0
 20 19  1  0  0  0  0
 21 20  1  0  0  0  0
 21 22  2  0  0  0  0
 22 24  1  0  0  0  0
 22 23  1  0  0  0  0
 23 40  1  0  0  0  0
 25 26  2  0  0  0  0
 25 24  1  0  0  0  0
 26 27  1  0  0  0  0
 27 36  1  0  0  0  0
 28 27  2  0  0  0  0
 28 29  1  0  0  0  0
 29 38  1  0  0  0  0
 30 24  2  0  0  0  0
 30 28  1  0  0  0  0
 31 18  1  0  0  0  0
 33 21  1  0  0  0  0
 34 25  1  0  0  0  0
 35 26  1  0  0  0  0
 37 29  1  0  0  0  0
 39 30  1  0  0  0  0
 40 43  1  0  0  0  0
 40 41  1  0  0  0  0
 42 40  1  0  0  0  0
 44 45  1  0  0  0  0
 44 46  1  0  0  0  0
 47 48  1  1  0  0  0
 47 44  1  0  0  0  0
 49 48  1  0  0  0  0
 50 52  1  0  0  0  0
 50 47  1  0  0  0  0
 50 20  1  0  0  0  0
 51 50  1  0  0  0  0
M  RAD  2  47   2  48   2
M  END
>  <energy_and_gap>
-15.286  3.313

$$$$
BEA_34/Syn014428/Syn014428.car
 OpenBabel12061810373D

 50 52  0  0  1  0  0  0  0  0999 V2000
    4.8407   -0.3894    0.3182 C   0  0  1  0  0  0  0  0  0  0  0  0
    6.0042    0.0571   -0.1270 N   0  0  0  0  0  0  0  0  0  0  0  0
    5.9407    1.4062   -0.1219 C   0  0  0  0  0  0  0  0  0  0  0  0
    4.6660    1.7546    0.3540 C   0  0  0  0  0  0  0  0  0  0  0  0
    4.0114    0.6001    0.6179 N   0  0  0  0  0  0  0  0  0  0  0  0
    4.5302   -1.7277    0.4475 N   0  0  0  0  0  0  0  0  0  0  0  0
    6.8125    1.9503   -0.4591 H   0  0  0  0  0  0  0  0  0  0  0  0
    4.1408    2.6821    0.5375 H   0  0  0  0  0  0  0  0  0  0  0  0
    3.6190   -2.0259    0.7788 H   0  0  0  0  0  0  0  0  0  0  0  0
    5.2062   -2.4459    0.2080 H   0  0  0  0  0  0  0  0  0  0  0  0
    7.1799   -0.6962   -0.5617 C   0  0  0  0  0  0  0  0  0  0  0  0
    6.8898   -1.3272   -1.4079 H   0  0  0  0  0  0  0  0  0  0  0  0
    7.5243   -1.3095    0.2772 H   0  0  0  0  0  0  0  0  0  0  0  0
    7.9721   -0.0050   -0.8671 H   0  0  0  0  0  0  0  0  0  0  0  0
   -2.9744    3.9322   -0.4130 C   0  0  0  0  0  0  0  0  0  0  0  0
   -3.1107    2.4463   -0.2567 C   0  0  0  0  0  0  0  0  0  0  0  0
   -4.3337    1.8744    0.1856 C   0  0  0  0  0  0  0  0  0  0  0  0
   -4.6216    0.5387    0.3516 N   0  0  0  0  0  0  0  0  0  0  0  0
   -3.5733   -0.2262    0.0450 C   0  0  0  0  0  0  0  0  0  0  0  0
   -3.4670   -1.5904    0.1170 N   0  0  0  0  0  0  0  0  0  0  0  0
   -2.2568   -1.9207   -0.3202 C   0  0  2  0  0  0  0  0  0  0  0  0
   -1.7793   -3.2166   -0.4188 N   0  0  0  0  0  0  0  0  0  0  0  0
   -1.5422   -0.8580   -0.6554 N   0  0  0  0  0  0  0  0  0  0  0  0
   -2.3128    0.2374   -0.4330 C   0  0  0  0  0  0  0  0  0  0  0  0
   -2.0420    1.5898   -0.6041 C   0  0  0  0  0  0  0  0  0  0  0  0
   -3.5545    4.4586    0.3514 H   0  0  0  0  0  0  0  0  0  0  0  0
   -3.3290    4.2414   -1.4011 H   0  0  0  0  0  0  0  0  0  0  0  0
   -1.9309    4.2433   -0.3014 H   0  0  0  0  0  0  0  0  0  0  0  0
   -5.1440    2.5585    0.4242 H   0  0  0  0  0  0  0  0  0  0  0  0
   -2.3765   -4.0231   -0.2739 H   0  0  0  0  0  0  0  0  0  0  0  0
   -0.8113   -3.4043   -0.6569 H   0  0  0  0  0  0  0  0  0  0  0  0
   -1.0901    1.9642   -0.9671 H   0  0  0  0  0  0  0  0  0  0  0  0
   -5.9735    0.2068    0.8120 C   0  0  0  0  0  0  0  0  0  0  0  0
   -5.9088   -0.1275    1.8520 H   0  0  0  0  0  0  0  0  0  0  0  0
   -6.6322    1.0791    0.7478 H   0  0  0  0  0  0  0  0  0  0  0  0
   -6.3780   -0.5799    0.1693 H   0  0  0  0  0  0  0  0  0  0  0  0
   -4.4953   -2.5198    0.6006 C   0  0  0  0  0  0  0  0  0  0  0  0
   -4.9040   -2.1379    1.5394 H   0  0  0  0  0  0  0  0  0  0  0  0
   -5.2708   -2.6046   -0.1669 H   0  0  0  0  0  0  0  0  0  0  0  0
   -4.0671   -3.5034    0.8042 H   0  0  0  0  0  0  0  0  0  0  0  0
   -0.1702   -0.7866   -1.1819 C   0  0  0  0  0  0  0  0  0  0  0  0
   -0.1190    0.0399   -1.8989 H   0  0  0  0  0  0  0  0  0  0  0  0
    0.0316   -1.6987   -1.7512 H   0  0  0  0  0  0  0  0  0  0  0  0
    0.8286   -0.6343   -0.0789 C   0  0  0  0  0  0  0  0  0  0  0  0
    0.9006   -1.4409    0.6432 H   0  0  0  0  0  0  0  0  0  0  0  0
    1.6406    0.4386    0.0389 C   0  0  0  0  0  0  0  0  0  0  0  0
    1.5728    1.2445   -0.6842 H   0  0  0  0  0  0  0  0  0  0  0  0
    2.6410    0.5871    1.1407 C   0  0  0  0  0  0  0  0  0  0  0  0
    2.5728   -0.2267    1.8707 H   0  0  0  0  0  0  0  0  0  0  0  0
    2.4669    1.5223    1.6837 H   0  0  0  0  0  0  0  0  0  0  0  0
  1  6  1  6  0  0  0
  1  5  1  0  0  0  0
  2  3  1  0  0  0  0
  2  1  1  0  0  0  0
  3  4  2  0  0  0  0
  4  8  1  0  0  0  0
  4  5  1  0  0  0  0
  5 48  1  0  0  0  0
  6  9  1  0  0  0  0
  7  3  1  0  0  0  0
 10  6  1  0  0  0  0
 11  2  1  0  0  0  0
 11 13  1  0  0  0  0
 12 11  1  0  0  0  0
 14 11  1  0  0  0  0
 15 28  1  0  0  0  0
 15 16  1  0  0  0  0
 15 26  1  0  0  0  0
 16 17  2  0  0  0  0
 17 18  1  0  0  0  0
 17 29  1  0  0  0  0
 18 33  1  0  0  0  0
 19 20  1  0  0  0  0
 19 18  1  0  0  0  0
 20 37  1  0  0  0  0
 21 22  1  1  0  0  0
 21 20  1  0  0  0  0
 22 30  1  0  0  0  0
 23 24  1  0  0  0  0
 23 21  1  0  0  0  0
 24 19  2  0  0  0  0
 25 24  1  0  0  0  0
 25 16  1  0  0  0  0
 27 15  1  0  0  0  0
 31 22  1  0  0  0  0
 32 25  1  0  0  0  0
 33 34  1  0  0  0  0
 35 33  1  0  0  0  0
 36 33  1  0  0  0  0
 37 40  1  0  0  0  0
 37 38  1  0  0  0  0
 39 37  1  0  0  0  0
 41 23  1  0  0  0  0
 41 44  1  0  0  0  0
 42 41  1  0  0  0  0
 43 41  1  0  0  0  0
 44 46  2  0  0  0  0
 44 45  1  0  0  0  0
 46 48  1  0  0  0  0
 47 46  1  0  0  0  0
 48 50  1  0  0  0  0
 48 49  1  0  0  0  0
M  END
>  <energy_and_gap>
-15.279  3.288

$$$$
BEA_34/Syn015912/Syn015912.car
 OpenBabel12061810373D

 49 52  0  0  1  0  0  0  0  0999 V2000
    4.0307   -1.7058   -1.4729 C   0  0  0  0  0  0  0  0  0  0  0  0
    3.5611   -1.0216   -0.2176 C   0  0  1  0  0  0  0  0  0  0  0  0
    2.2998   -1.0196    0.2114 N   0  0  0  0  0  0  0  0  0  0  0  0
    2.2952   -0.3196    1.3728 C   0  0  0  0  0  0  0  0  0  0  0  0
    1.2067   -0.0612    2.1795 N   0  0  0  0  0  0  0  0  0  0  0  0
    3.6038    0.1171    1.6237 C   0  0  0  0  0  0  0  0  0  0  0  0
    4.3579   -0.3487    0.6058 N   0  0  0  0  0  0  0  0  0  0  0  0
    5.0538   -1.4199   -1.7305 H   0  0  0  0  0  0  0  0  0  0  0  0
    4.0027   -2.7906   -1.3366 H   0  0  0  0  0  0  0  0  0  0  0  0
    3.3900   -1.4402   -2.3178 H   0  0  0  0  0  0  0  0  0  0  0  0
    1.3004    0.4972    3.0236 H   0  0  0  0  0  0  0  0  0  0  0  0
    0.2934   -0.4520    1.9752 H   0  0  0  0  0  0  0  0  0  0  0  0
    4.0990    0.6939    2.3939 H   0  0  0  0  0  0  0  0  0  0  0  0
    5.7970   -0.1123    0.5012 C   0  0  0  0  0  0  0  0  0  0  0  0
    6.1517    0.4232    1.3879 H   0  0  0  0  0  0  0  0  0  0  0  0
    6.3016   -1.0811    0.4287 H   0  0  0  0  0  0  0  0  0  0  0  0
    5.9814    0.4883   -0.3953 H   0  0  0  0  0  0  0  0  0  0  0  0
    1.4538    1.9750   -1.3370 N   0  0  0  0  0  0  0  0  0  0  0  0
    0.1923    1.5827   -0.9143 C   0  0  2  0  0  0  0  0  0  0  0  0
   -0.6783    2.4277   -0.3955 N   0  0  0  0  0  0  0  0  0  0  0  0
   -1.7936    1.7285   -0.0746 C   0  0  0  0  0  0  0  0  0  0  0  0
   -2.9813    2.1775    0.4928 C   0  0  0  0  0  0  0  0  0  0  0  0
   -3.9678    1.2014    0.7128 C   0  0  0  0  0  0  0  0  0  0  0  0
   -3.7664   -0.1635    0.3826 C   0  0  0  0  0  0  0  0  0  0  0  0
   -4.8093   -1.0873    0.6416 C   0  0  0  0  0  0  0  0  0  0  0  0
   -4.6507   -2.4489    0.3372 C   0  0  0  0  0  0  0  0  0  0  0  0
   -3.4515   -2.9089   -0.2270 C   0  0  0  0  0  0  0  0  0  0  0  0
   -2.4003   -2.0145   -0.4960 C   0  0  0  0  0  0  0  0  0  0  0  0
   -2.5344   -0.6297   -0.2029 C   0  0  0  0  0  0  0  0  0  0  0  0
   -1.5530    0.3631   -0.4274 C   0  0  0  0  0  0  0  0  0  0  0  0
   -0.2811    0.3394   -0.9575 N   0  0  0  0  0  0  0  0  0  0  0  0
    2.1254    1.3238   -1.7254 H   0  0  0  0  0  0  0  0  0  0  0  0
    1.7453    2.9452   -1.2798 H   0  0  0  0  0  0  0  0  0  0  0  0
   -3.1586    3.2142    0.7568 H   0  0  0  0  0  0  0  0  0  0  0  0
   -4.9075    1.5215    1.1537 H   0  0  0  0  0  0  0  0  0  0  0  0
   -5.4560   -3.1467    0.5408 H   0  0  0  0  0  0  0  0  0  0  0  0
   -3.3349   -3.9629   -0.4562 H   0  0  0  0  0  0  0  0  0  0  0  0
   -1.5026   -2.4350   -0.9235 H   0  0  0  0  0  0  0  0  0  0  0  0
   -0.4611    3.8667   -0.2033 C   0  0  0  0  0  0  0  0  0  0  0  0
   -1.3439    4.3326    0.2407 H   0  0  0  0  0  0  0  0  0  0  0  0
    0.3948    4.0009    0.4663 H   0  0  0  0  0  0  0  0  0  0  0  0
   -0.2650    4.3208   -1.1801 H   0  0  0  0  0  0  0  0  0  0  0  0
   -5.7471   -0.7594    1.0807 H   0  0  0  0  0  0  0  0  0  0  0  0
    1.5246   -2.5996   -0.8942 H   0  0  0  0  0  0  0  0  0  0  0  0
    1.1550   -1.6751   -0.4393 C   0  0  0  0  0  0  0  0  0  0  0  0
    0.4542   -1.9746    0.3450 H   0  0  0  0  0  0  0  0  0  0  0  0
    0.4700   -0.8025   -1.5126 C   0  0  0  0  0  0  0  0  0  0  0  0
    1.1979   -0.4339   -2.2389 H   0  0  0  0  0  0  0  0  0  0  0  0
   -0.2316   -1.3900   -2.1080 H   0  0  0  0  0  0  0  0  0  0  0  0
  1  9  1  0  0  0  0
  2  1  1  1  0  0  0
  2  3  1  0  0  0  0
  2  7  1  0  0  0  0
  3  4  1  0  0  0  0
  4  6  2  0  0  0  0
  4  5  1  0  0  0  0
  5 11  1  0  0  0  0
  6 13  1  0  0  0  0
  7  6  1  0  0  0  0
  8  1  1  0  0  0  0
 10  1  1  0  0  0  0
 12  5  1  0  0  0  0
 14  7  1  0  0  0  0
 14 15  1  0  0  0  0
 16 14  1  0  0  0  0
 17 14  1  0  0  0  0
 18 33  1  0  0  0  0
 19 18  1  1  0  0  0
 19 20  1  0  0  0  0
 20 39  1  0  0  0  0
 20 21  1  0  0  0  0
 21 22  2  0  0  0  0
 22 23  1  0  0  0  0
 22 34  1  0  0  0  0
 23 35  1  0  0  0  0
 24 25  2  0  0  0  0
 24 23  1  0  0  0  0
 25 43  1  0  0  0  0
 26 36  1  0  0  0  0
 26 25  1  0  0  0  0
 27 26  2  0  0  0  0
 28 27  1  0  0  0  0
 28 29  1  0  0  0  0
 29 24  1  0  0  0  0
 30 29  2  0  0  0  0
 30 21  1  0  0  0  0
 31 19  1  0  0  0  0
 31 30  1  0  0  0  0
 32 18  1  0  0  0  0
 37 27  1  0  0  0  0
 38 28  1  0  0  0  0
 39 40  1  0  0  0  0
 39 41  1  0  0  0  0
 42 39  1  0  0  0  0
 44 45  1  0  0  0  0
 45  3  1  0  0  0  0
 45 46  1  0  0  0  0
 47 31  1  0  0  0  0
 47 45  1  0  0  0  0
 48 47  1  0  0  0  0
 49 47  1  0  0  0  0
M  END
>  <energy_and_gap>
-15.289  2.520

$$$$
BEA_34/Syn017021/Syn017021.car
 OpenBabel12061810373D

 49 52  0  0  1  0  0  0  0  0999 V2000
   -4.3850   -0.4458    0.5800 C   0  0  2  0  0  0  0  0  0  0  0  0
   -5.0436   -1.1004   -0.3624 N   0  0  0  0  0  0  0  0  0  0  0  0
   -5.1076   -0.2884   -1.4396 C   0  0  0  0  0  0  0  0  0  0  0  0
   -4.4459    0.9014   -1.0953 C   0  0  0  0  0  0  0  0  0  0  0  0
   -4.0029    0.7570    0.1755 N   0  0  0  0  0  0  0  0  0  0  0  0
   -4.1242   -0.9602    1.8334 N   0  0  0  0  0  0  0  0  0  0  0  0
   -5.6185   -0.6597   -2.3176 H   0  0  0  0  0  0  0  0  0  0  0  0
   -4.2314    1.8345   -1.5985 H   0  0  0  0  0  0  0  0  0  0  0  0
   -4.4342   -1.8917    2.0903 H   0  0  0  0  0  0  0  0  0  0  0  0
   -3.6259   -0.4174    2.5308 H   0  0  0  0  0  0  0  0  0  0  0  0
   -5.6222   -2.4429   -0.3248 C   0  0  0  0  0  0  0  0  0  0  0  0
   -6.0968   -2.6699   -1.2849 H   0  0  0  0  0  0  0  0  0  0  0  0
   -4.8170   -3.1584   -0.1293 H   0  0  0  0  0  0  0  0  0  0  0  0
   -6.3684   -2.4728    0.4757 H   0  0  0  0  0  0  0  0  0  0  0  0
    4.3805   -2.5023    0.0536 C   0  0  0  0  0  0  0  0  0  0  0  0
    5.7161   -2.0695    0.1364 C   0  0  0  0  0  0  0  0  0  0  0  0
    6.0177   -0.6972    0.1396 C   0  0  0  0  0  0  0  0  0  0  0  0
    4.9881    0.2578    0.0600 C   0  0  0  0  0  0  0  0  0  0  0  0
    3.6354   -0.1629   -0.0240 C   0  0  0  0  0  0  0  0  0  0  0  0
    3.3224   -1.5629   -0.0276 C   0  0  0  0  0  0  0  0  0  0  0  0
    2.5358    0.7072   -0.1085 C   0  0  0  0  0  0  0  0  0  0  0  0
    1.1836    0.2286   -0.1939 C   0  0  0  0  0  0  0  0  0  0  0  0
    0.8779   -1.1395   -0.1902 C   0  0  0  0  0  0  0  0  0  0  0  0
    1.9821   -2.0243   -0.1085 C   0  0  0  0  0  0  0  0  0  0  0  0
    2.4541    2.0670   -0.1293 N   0  0  0  0  0  0  0  0  0  0  0  0
    1.1840    2.3843   -0.2247 C   0  0  0  0  0  0  0  0  0  0  0  0
    0.3914    1.3363   -0.2707 N   0  0  0  0  0  0  0  0  0  0  0  0
   -0.4299   -1.6661   -0.2542 N   0  0  0  0  0  0  0  0  0  0  0  0
    4.1782   -3.5693    0.0536 H   0  0  0  0  0  0  0  0  0  0  0  0
    6.5172   -2.7984    0.1981 H   0  0  0  0  0  0  0  0  0  0  0  0
    7.0510   -0.3729    0.2037 H   0  0  0  0  0  0  0  0  0  0  0  0
    5.2677    1.3032    0.0652 H   0  0  0  0  0  0  0  0  0  0  0  0
    0.8260    3.4068   -0.2611 H   0  0  0  0  0  0  0  0  0  0  0  0
   -0.5746   -2.6720   -0.2806 H   0  0  0  0  0  0  0  0  0  0  0  0
   -1.2478   -1.0707   -0.2475 H   0  0  0  0  0  0  0  0  0  0  0  0
    3.4427    3.1448   -0.0707 C   0  0  0  0  0  0  0  0  0  0  0  0
    3.9932    3.0528    0.8708 H   0  0  0  0  0  0  0  0  0  0  0  0
    4.1130    3.0408   -0.9295 H   0  0  0  0  0  0  0  0  0  0  0  0
    2.9513    4.1231   -0.1095 H   0  0  0  0  0  0  0  0  0  0  0  0
    1.7941   -3.0951   -0.1040 H   0  0  0  0  0  0  0  0  0  0  0  0
   -1.0502    1.5919   -0.3908 C   0  0  0  0  0  0  0  0  0  0  0  0
   -1.4516    0.8494   -1.0848 H   0  0  0  0  0  0  0  0  0  0  0  0
   -1.1970    2.5679   -0.8691 H   0  0  0  0  0  0  0  0  0  0  0  0
   -1.7546    1.5525    0.9772 C   0  0  0  0  0  0  0  0  0  0  0  0
   -1.3093    2.3094    1.6304 H   0  0  0  0  0  0  0  0  0  0  0  0
   -1.5726    0.5885    1.4610 H   0  0  0  0  0  0  0  0  0  0  0  0
   -3.2662    1.8183    0.8755 C   0  0  0  0  0  0  0  0  0  0  0  0
   -3.7016    1.8976    1.8771 H   0  0  0  0  0  0  0  0  0  0  0  0
   -3.4606    2.7697    0.3678 H   0  0  0  0  0  0  0  0  0  0  0  0
  1  6  1  6  0  0  0
  2 11  1  0  0  0  0
  2  1  1  0  0  0  0
  3  4  2  0  0  0  0
  3  2  1  0  0  0  0
  4  5  1  0  0  0  0
  5  1  1  0  0  0  0
  5 47  1  0  0  0  0
  6  9  1  0  0  0  0
  6 10  1  0  0  0  0
  7  3  1  0  0  0  0
  8  4  1  0  0  0  0
 11 13  1  0  0  0  0
 11 14  1  0  0  0  0
 12 11  1  0  0  0  0
 15 16  1  0  0  0  0
 16 17  2  0  0  0  0
 16 30  1  0  0  0  0
 17 31  1  0  0  0  0
 18 32  1  0  0  0  0
 18 17  1  0  0  0  0
 19 18  1  0  0  0  0
 20 19  1  0  0  0  0
 20 15  2  0  0  0  0
 21 19  2  0  0  0  0
 22 23  2  0  0  0  0
 22 21  1  0  0  0  0
 23 24  1  0  0  0  0
 24 40  1  0  0  0  0
 24 20  1  0  0  0  0
 25 21  1  0  0  0  0
 25 36  1  0  0  0  0
 26 25  1  0  0  0  0
 27 26  1  0  0  0  0
 27 22  1  0  0  0  0
 28 35  1  0  0  0  0
 28 23  1  0  0  0  0
 29 15  1  0  0  0  0
 33 26  1  0  0  0  0
 34 28  1  0  0  0  0
 36 37  1  0  0  0  0
 38 36  1  0  0  0  0
 39 36  1  0  0  0  0
 41 27  1  0  0  0  0
 41 44  1  0  0  0  0
 42 41  1  0  0  0  0
 43 41  1  0  0  0  0
 44 46  1  0  0  0  0
 44 45  1  0  0  0  0
 47 44  1  0  0  0  0
 47 48  1  0  0  0  0
 49 47  1  0  0  0  0
M  END
>  <energy_and_gap>
-16.167  2.456

$$$$
BEA_34/Syn011423/Syn011423.car
 OpenBabel12061810373D

 48 50  0  0  1  0  0  0  0  0999 V2000
   -3.6917   -0.5206   -0.7605 C   0  0  2  0  0  0  0  0  0  0  0  0
   -4.9473   -0.7251   -0.3958 N   0  0  0  0  0  0  0  0  0  0  0  0
   -5.4276    0.4523    0.0574 C   0  0  0  0  0  0  0  0  0  0  0  0
   -4.3873    1.3880   -0.0537 C   0  0  0  0  0  0  0  0  0  0  0  0
   -3.3129    0.7338   -0.5579 N   0  0  0  0  0  0  0  0  0  0  0  0
   -2.8843   -1.5032   -1.2965 N   0  0  0  0  0  0  0  0  0  0  0  0
   -6.4537    0.4781    0.3983 H   0  0  0  0  0  0  0  0  0  0  0  0
   -4.2780    2.4416    0.1653 H   0  0  0  0  0  0  0  0  0  0  0  0
   -3.2276   -2.4509   -1.4152 H   0  0  0  0  0  0  0  0  0  0  0  0
   -1.9383   -1.3047   -1.6021 H   0  0  0  0  0  0  0  0  0  0  0  0
   -5.7397   -1.9535   -0.4470 C   0  0  0  0  0  0  0  0  0  0  0  0
   -5.2359   -2.7127    0.1598 H   0  0  0  0  0  0  0  0  0  0  0  0
   -5.8067   -2.2754   -1.4912 H   0  0  0  0  0  0  0  0  0  0  0  0
   -6.7426   -1.7659   -0.0499 H   0  0  0  0  0  0  0  0  0  0  0  0
    1.6919   -1.2706    0.4173 N   0  0  0  0  0  0  0  0  0  0  0  0
    0.4640   -1.0227    0.8626 C   0  0  2  0  0  0  0  0  0  0  0  0
    0.2473    0.2715    1.0357 N   0  0  0  0  0  0  0  0  0  0  0  0
    2.3411   -0.0711    0.3387 C   0  0  0  0  0  0  0  0  0  0  0  0
    1.3996    0.9048    0.7221 C   0  0  0  0  0  0  0  0  0  0  0  0
    3.7329    0.0546   -0.0829 C   0  0  0  0  0  0  0  0  0  0  0  0
   -0.4804   -1.9961    1.1321 N   0  0  0  0  0  0  0  0  0  0  0  0
    4.0749    0.9257   -1.1479 C   0  0  0  0  0  0  0  0  0  0  0  0
    4.7692   -0.6496    0.5840 C   0  0  0  0  0  0  0  0  0  0  0  0
    6.1092   -0.5003    0.1786 C   0  0  0  0  0  0  0  0  0  0  0  0
    5.4169    1.0707   -1.5488 C   0  0  0  0  0  0  0  0  0  0  0  0
    6.4329    0.3572   -0.8880 C   0  0  0  0  0  0  0  0  0  0  0  0
    1.4176    1.9821    0.8209 H   0  0  0  0  0  0  0  0  0  0  0  0
   -1.4016   -1.7567    1.4808 H   0  0  0  0  0  0  0  0  0  0  0  0
   -0.2690   -2.9825    1.0249 H   0  0  0  0  0  0  0  0  0  0  0  0
    3.3092    1.4881   -1.6739 H   0  0  0  0  0  0  0  0  0  0  0  0
    4.5455   -1.3090    1.4170 H   0  0  0  0  0  0  0  0  0  0  0  0
    6.8944   -1.0453    0.6919 H   0  0  0  0  0  0  0  0  0  0  0  0
    5.6686    1.7350   -2.3687 H   0  0  0  0  0  0  0  0  0  0  0  0
    7.4662    0.4712   -1.1983 H   0  0  0  0  0  0  0  0  0  0  0  0
    2.1946   -2.6070    0.0720 C   0  0  0  0  0  0  0  0  0  0  0  0
    3.0558   -2.5209   -0.5958 H   0  0  0  0  0  0  0  0  0  0  0  0
    1.4124   -3.1627   -0.4545 H   0  0  0  0  0  0  0  0  0  0  0  0
    2.4773   -3.1171    0.9984 H   0  0  0  0  0  0  0  0  0  0  0  0
   -2.0520    1.4471   -0.8042 C   0  0  0  0  0  0  0  0  0  0  0  0
   -2.2792    2.2413   -1.5250 H   0  0  0  0  0  0  0  0  0  0  0  0
   -1.3536    0.7681   -1.3006 H   0  0  0  0  0  0  0  0  0  0  0  0
   -1.4351    2.0024    0.4552 C   0  0  0  0  0  0  0  0  0  0  0  0
   -1.3494    3.3388    0.6460 C   0  0  0  0  0  0  0  0  0  0  0  0
   -1.7175    4.0412   -0.0935 H   0  0  0  0  0  0  0  0  0  0  0  0
   -0.9096    3.7553    1.5454 H   0  0  0  0  0  0  0  0  0  0  0  0
   -0.9141    1.0452    1.4980 C   0  0  0  0  0  0  0  0  0  0  0  0
   -0.5972    1.5720    2.4057 H   0  0  0  0  0  0  0  0  0  0  0  0
   -1.7026    0.3519    1.8022 H   0  0  0  0  0  0  0  0  0  0  0  0
  1  6  1  6  0  0  0
  1  5  1  0  0  0  0
  1  2  1  0  0  0  0
  2  3  1  0  0  0  0
  3  7  1  0  0  0  0
  4  3  2  0  0  0  0
  4  8  1  0  0  0  0
  5  4  1  0  0  0  0
  9  6  1  0  0  0  0
 10  6  1  0  0  0  0
 11  2  1  0  0  0  0
 11 14  1  0  0  0  0
 11 12  1  0  0  0  0
 13 11  1  0  0  0  0
 15 16  1  0  0  0  0
 16 17  1  0  0  0  0
 16 21  1  1  0  0  0
 17 46  1  0  0  0  0
 18 15  1  0  0  0  0
 18 19  2  0  0  0  0
 19 27  1  0  0  0  0
 19 17  1  0  0  0  0
 20 18  1  0  0  0  0
 20 23  2  0  0  0  0
 21 28  1  0  0  0  0
 22 20  1  0  0  0  0
 23 31  1  0  0  0  0
 24 23  1  0  0  0  0
 24 32  1  0  0  0  0
 25 22  2  0  0  0  0
 25 26  1  0  0  0  0
 26 24  2  0  0  0  0
 29 21  1  0  0  0  0
 30 22  1  0  0  0  0
 33 25  1  0  0  0  0
 34 26  1  0  0  0  0
 35 15  1  0  0  0  0
 35 38  1  0  0  0  0
 36 35  1  0  0  0  0
 37 35  1  0  0  0  0
 39  5  1  0  0  0  0
 39 42  1  0  0  0  0
 40 39  1  0  0  0  0
 41 39  1  0  0  0  0
 42 43  2  0  0  0  0
 42 46  1  0  0  0  0
 43 45  1  0  0  0  0
 44 43  1  0  0  0  0
 46 48  1  0  0  0  0
 46 47  1  0  0  0  0
M  END
>  <energy_and_gap>
-15.547  2.349

$$$$
BEA_34/Syn009527/Syn009527.car
 OpenBabel12061810373D

 50 52  0  0  1  0  0  0  0  0999 V2000
   -1.9587    1.8231    0.3321 C   0  0  1  0  0  0  0  0  0  0  0  0
   -0.9096    2.5593    0.0027 N   0  0  0  0  0  0  0  0  0  0  0  0
   -0.7260    2.4195   -1.3272 C   0  0  0  0  0  0  0  0  0  0  0  0
   -1.7234    1.5455   -1.7873 C   0  0  0  0  0  0  0  0  0  0  0  0
   -2.4613    1.1779   -0.7115 N   0  0  0  0  0  0  0  0  0  0  0  0
   -2.4539    1.7347    1.6166 N   0  0  0  0  0  0  0  0  0  0  0  0
    0.0909    2.9638   -1.7813 H   0  0  0  0  0  0  0  0  0  0  0  0
   -1.9975    1.1357   -2.7499 H   0  0  0  0  0  0  0  0  0  0  0  0
   -2.0249    2.2517    2.3775 H   0  0  0  0  0  0  0  0  0  0  0  0
   -3.2706    1.1733    1.8323 H   0  0  0  0  0  0  0  0  0  0  0  0
   -0.0598    3.3948    0.8506 C   0  0  0  0  0  0  0  0  0  0  0  0
    0.3409    2.7720    1.6569 H   0  0  0  0  0  0  0  0  0  0  0  0
    0.7634    3.8084    0.2590 H   0  0  0  0  0  0  0  0  0  0  0  0
   -0.6733    4.2052    1.2571 H   0  0  0  0  0  0  0  0  0  0  0  0
   -1.7008   -1.4542    2.6256 N   0  0  0  0  0  0  0  0  0  0  0  0
   -0.8940   -1.4509    1.5029 C   0  0  1  0  0  0  0  0  0  0  0  0
   -1.3340   -1.7281    0.2853 N   0  0  0  0  0  0  0  0  0  0  0  0
   -0.2700   -1.6437   -0.5433 C   0  0  0  0  0  0  0  0  0  0  0  0
    0.8374   -1.2206    0.2173 C   0  0  0  0  0  0  0  0  0  0  0  0
    0.4005   -1.1482    1.5095 N   0  0  0  0  0  0  0  0  0  0  0  0
    2.2037   -0.8993   -0.1795 C   0  0  0  0  0  0  0  0  0  0  0  0
    2.9712   -1.8400   -0.9099 C   0  0  0  0  0  0  0  0  0  0  0  0
    4.2801   -1.5278   -1.3236 C   0  0  0  0  0  0  0  0  0  0  0  0
    4.8392   -0.2725   -1.0252 C   0  0  0  0  0  0  0  0  0  0  0  0
    4.0808    0.6802   -0.3089 C   0  0  0  0  0  0  0  0  0  0  0  0
    4.6343    1.9429   -0.0144 N   0  0  0  0  0  0  0  0  0  0  0  0
    2.7662    0.3708    0.1102 C   0  0  0  0  0  0  0  0  0  0  0  0
   -1.3453   -1.1768    3.5344 H   0  0  0  0  0  0  0  0  0  0  0  0
   -2.6763   -1.7263    2.5752 H   0  0  0  0  0  0  0  0  0  0  0  0
   -0.4365   -1.8633   -1.5897 H   0  0  0  0  0  0  0  0  0  0  0  0
    2.5652   -2.8166   -1.1565 H   0  0  0  0  0  0  0  0  0  0  0  0
    4.8605   -2.2584   -1.8768 H   0  0  0  0  0  0  0  0  0  0  0  0
    5.8501   -0.0499   -1.3535 H   0  0  0  0  0  0  0  0  0  0  0  0
    5.5779    2.1762   -0.3124 H   0  0  0  0  0  0  0  0  0  0  0  0
    4.1021    2.6355    0.5055 H   0  0  0  0  0  0  0  0  0  0  0  0
    2.1858    1.1117    0.6528 H   0  0  0  0  0  0  0  0  0  0  0  0
    1.1687   -0.8160    2.7164 C   0  0  0  0  0  0  0  0  0  0  0  0
    0.9520    0.2229    2.9853 H   0  0  0  0  0  0  0  0  0  0  0  0
    2.2374   -0.9470    2.5274 H   0  0  0  0  0  0  0  0  0  0  0  0
    0.8817   -1.4951    3.5253 H   0  0  0  0  0  0  0  0  0  0  0  0
   -2.6559   -2.0948   -0.2415 C   0  0  0  0  0  0  0  0  0  0  0  0
   -3.3632   -2.1549    0.5900 H   0  0  0  0  0  0  0  0  0  0  0  0
   -2.5587   -3.1108   -0.6418 H   0  0  0  0  0  0  0  0  0  0  0  0
   -3.1788   -1.1358   -1.2839 C   0  0  0  0  0  0  0  0  0  0  0  0
   -3.3560   -1.5469   -2.5606 C   0  0  0  0  0  0  0  0  0  0  0  0
   -3.0987   -2.5530   -2.8726 H   0  0  0  0  0  0  0  0  0  0  0  0
   -3.7669   -0.8868   -3.3163 H   0  0  0  0  0  0  0  0  0  0  0  0
   -3.5940    0.2534   -0.8638 C   0  0  0  0  0  0  0  0  0  0  0  0
   -4.2690    0.7058   -1.5998 H   0  0  0  0  0  0  0  0  0  0  0  0
   -4.1491    0.2148    0.0778 H   0  0  0  0  0  0  0  0  0  0  0  0
  1  6  1  1  0  0  0
  2  1  1  0  0  0  0
  2 11  1  0  0  0  0
  3  2  1  0  0  0  0
  4  3  2  0  0  0  0
  4  5  1  0  0  0  0
  5  1  1  0  0  0  0
  6 10  1  0  0  0  0
  6  9  1  0  0  0  0
  7  3  1  0  0  0  0
  8  4  1  0  0  0  0
 11 14  1  0  0  0  0
 11 12  1  0  0  0  0
 13 11  1  0  0  0  0
 15 28  1  0  0  0  0
 16 20  1  0  0  0  0
 16 15  1  6  0  0  0
 17 16  1  0  0  0  0
 18 19  2  0  0  0  0
 18 17  1  0  0  0  0
 19 20  1  0  0  0  0
 20 37  1  0  0  0  0
 21 27  1  0  0  0  0
 21 19  1  0  0  0  0
 22 21  2  0  0  0  0
 23 24  2  0  0  0  0
 23 22  1  0  0  0  0
 24 25  1  0  0  0  0
 25 26  1  0  0  0  0
 25 27  2  0  0  0  0
 26 35  1  0  0  0  0
 27 36  1  0  0  0  0
 29 15  1  0  0  0  0
 30 18  1  0  0  0  0
 31 22  1  0  0  0  0
 32 23  1  0  0  0  0
 33 24  1  0  0  0  0
 34 26  1  0  0  0  0
 37 38  1  0  0  0  0
 37 40  1  0  0  0  0
 39 37  1  0  0  0  0
 41 17  1  0  0  0  0
 41 42  1  0  0  0  0
 43 41  1  0  0  0  0
 44 48  1  0  0  0  0
 44 41  1  0  0  0  0
 45 44  2  0  0  0  0
 46 45  1  0  0  0  0
 47 45  1  0  0  0  0
 48  5  1  0  0  0  0
 48 50  1  0  0  0  0
 49 48  1  0  0  0  0
M  END
>  <energy_and_gap>
-15.082  2.201

$$$$
BEA_34/Syn009214/Syn009214.car
 OpenBabel12061810373D

 47 49  0  0  1  0  0  0  0  0999 V2000
   -2.8093    1.0102    0.6255 C   0  0  1  0  0  0  0  0  0  0  0  0
   -3.7531    0.2510    0.0927 N   0  0  0  0  0  0  0  0  0  0  0  0
   -3.6639    0.3879   -1.2477 C   0  0  0  0  0  0  0  0  0  0  0  0
   -2.6064    1.2765   -1.4988 C   0  0  0  0  0  0  0  0  0  0  0  0
   -2.1003    1.6431   -0.2980 N   0  0  0  0  0  0  0  0  0  0  0  0
   -2.5985    1.1276    1.9842 N   0  0  0  0  0  0  0  0  0  0  0  0
   -4.3668   -0.1646   -1.8562 H   0  0  0  0  0  0  0  0  0  0  0  0
   -2.1516    1.6974   -2.3853 H   0  0  0  0  0  0  0  0  0  0  0  0
   -3.1791    0.6240    2.6469 H   0  0  0  0  0  0  0  0  0  0  0  0
   -1.8650    1.7215    2.3556 H   0  0  0  0  0  0  0  0  0  0  0  0
   -4.7513   -0.5923    0.7499 C   0  0  0  0  0  0  0  0  0  0  0  0
   -5.4491    0.0599    1.2846 H   0  0  0  0  0  0  0  0  0  0  0  0
   -4.2375   -1.2603    1.4481 H   0  0  0  0  0  0  0  0  0  0  0  0
   -5.2879   -1.1842    0.0013 H   0  0  0  0  0  0  0  0  0  0  0  0
    2.1096    0.3486    0.4339 N   0  0  0  0  0  0  0  0  0  0  0  0
    3.4126    0.6096    0.3721 C   0  0  1  0  0  0  0  0  0  0  0  0
    4.1134   -0.4455   -0.0048 N   0  0  0  0  0  0  0  0  0  0  0  0
    1.9492   -0.9576    0.0624 C   0  0  0  0  0  0  0  0  0  0  0  0
    3.2397   -1.4496   -0.2162 C   0  0  0  0  0  0  0  0  0  0  0  0
    0.6416   -1.5922   -0.0229 C   0  0  0  0  0  0  0  0  0  0  0  0
    3.9900    1.8360    0.6423 N   0  0  0  0  0  0  0  0  0  0  0  0
    0.0537   -1.8366   -1.2880 C   0  0  0  0  0  0  0  0  0  0  0  0
   -0.0423   -2.0032    1.1480 C   0  0  0  0  0  0  0  0  0  0  0  0
   -1.2942   -2.6400    1.0515 C   0  0  0  0  0  0  0  0  0  0  0  0
   -1.1977   -2.4754   -1.3778 C   0  0  0  0  0  0  0  0  0  0  0  0
   -1.8704   -2.8776   -0.2097 C   0  0  0  0  0  0  0  0  0  0  0  0
    3.6439   -2.3976   -0.5454 H   0  0  0  0  0  0  0  0  0  0  0  0
    3.4297    2.6565    0.8451 H   0  0  0  0  0  0  0  0  0  0  0  0
    4.9972    1.9553    0.6077 H   0  0  0  0  0  0  0  0  0  0  0  0
    0.5588   -1.5371   -2.2016 H   0  0  0  0  0  0  0  0  0  0  0  0
    0.3900   -1.8365    2.1301 H   0  0  0  0  0  0  0  0  0  0  0  0
   -1.8136   -2.9526    1.9512 H   0  0  0  0  0  0  0  0  0  0  0  0
   -1.6421   -2.6620   -2.3497 H   0  0  0  0  0  0  0  0  0  0  0  0
   -2.8333   -3.3722   -0.2812 H   0  0  0  0  0  0  0  0  0  0  0  0
    5.5569   -0.5853   -0.1979 C   0  0  0  0  0  0  0  0  0  0  0  0
    6.0540   -0.3547    0.7497 H   0  0  0  0  0  0  0  0  0  0  0  0
    5.7951   -1.6097   -0.5020 H   0  0  0  0  0  0  0  0  0  0  0  0
    5.8682    0.1166   -0.9782 H   0  0  0  0  0  0  0  0  0  0  0  0
    1.0330    1.2885    0.8011 C   0  0  0  0  0  0  0  0  0  0  0  0
    0.3156    0.7405    1.4170 H   0  0  0  0  0  0  0  0  0  0  0  0
    1.4501    2.0640    1.4501 H   0  0  0  0  0  0  0  0  0  0  0  0
    0.3467    1.9156   -0.3833 C   0  0  2  0  0  0  0  0  0  0  0  0
    0.9534    1.9489   -1.5150 N   0  0  0  0  0  0  0  0  0  0  0  0
    0.4116    2.4414   -2.2355 H   0  0  0  0  0  0  0  0  0  0  0  0
   -0.9866    2.5948   -0.2076 C   0  0  0  0  0  0  0  0  0  0  0  0
   -1.1546    3.3771   -0.9575 H   0  0  0  0  0  0  0  0  0  0  0  0
   -1.0405    3.0905    0.7669 H   0  0  0  0  0  0  0  0  0  0  0  0
  1  6  1  1  0  0  0
  2  1  1  0  0  0  0
  2 11  1  0  0  0  0
  3  2  1  0  0  0  0
  4  3  2  0  0  0  0
  4  5  1  0  0  0  0
  5 45  1  0  0  0  0
  5  1  1  0  0  0  0
  6 10  1  0  0  0  0
  6  9  1  0  0  0  0
  7  3  1  0  0  0  0
  8  4  1  0  0  0  0
 11 12  1  0  0  0  0
 11 13  1  0  0  0  0
 14 11  1  0  0  0  0
 15 39  1  0  0  0  0
 16 15  1  0  0  0  0
 16 21  1  6  0  0  0
 17 16  1  0  0  0  0
 18 15  1  0  0  0  0
 19 17  1  0  0  0  0
 19 18  2  0  0  0  0
 20 18  1  0  0  0  0
 20 23  2  0  0  0  0
 21 28  1  0  0  0  0
 22 20  1  0  0  0  0
 23 31  1  0  0  0  0
 24 23  1  0  0  0  0
 24 32  1  0  0  0  0
 25 22  2  0  0  0  0
 25 26  1  0  0  0  0
 26 24  2  0  0  0  0
 27 19  1  0  0  0  0
 29 21  1  0  0  0  0
 30 22  1  0  0  0  0
 33 25  1  0  0  0  0
 34 26  1  0  0  0  0
 35 17  1  0  0  0  0
 35 36  1  0  0  0  0
 37 35  1  0  0  0  0
 38 35  1  0  0  0  0
 39 40  1  0  0  0  0
 39 41  1  0  0  0  0
 42 43  1  1  0  0  0
 42 45  1  0  0  0  0
 42 39  1  0  0  0  0
 44 43  1  0  0  0  0
 45 47  1  0  0  0  0
 46 45  1  0  0  0  0
M  RAD  2  42   2  43   2
M  END
>  <energy_and_gap>
-15.255  2.108

$$$$
BEA_34/Syn016241/Syn016241.car
 OpenBabel12061810373D

 49 51  0  0  1  0  0  0  0  0999 V2000
    4.1304    2.1436    0.5562 C   0  0  0  0  0  0  0  0  0  0  0  0
    4.1791    0.7214    0.0686 C   0  0  2  0  0  0  0  0  0  0  0  0
    3.2968   -0.2172    0.4043 N   0  0  0  0  0  0  0  0  0  0  0  0
    3.6812   -1.3479   -0.2367 C   0  0  0  0  0  0  0  0  0  0  0  0
    3.0540   -2.5752   -0.1920 N   0  0  0  0  0  0  0  0  0  0  0  0
    4.8392   -1.0585   -0.9732 C   0  0  0  0  0  0  0  0  0  0  0  0
    5.1121    0.2445   -0.7485 N   0  0  0  0  0  0  0  0  0  0  0  0
    4.4367    2.1866    1.6053 H   0  0  0  0  0  0  0  0  0  0  0  0
    3.1167    2.5439    0.4673 H   0  0  0  0  0  0  0  0  0  0  0  0
    4.7943    2.7910   -0.0228 H   0  0  0  0  0  0  0  0  0  0  0  0
    3.4205   -3.3715   -0.7066 H   0  0  0  0  0  0  0  0  0  0  0  0
    2.2127   -2.7169    0.3571 H   0  0  0  0  0  0  0  0  0  0  0  0
    5.5044   -1.6065   -1.6277 H   0  0  0  0  0  0  0  0  0  0  0  0
    6.2550    0.9390   -1.3397 C   0  0  0  0  0  0  0  0  0  0  0  0
    5.8744    1.7049   -2.0231 H   0  0  0  0  0  0  0  0  0  0  0  0
    6.8374    1.3953   -0.5327 H   0  0  0  0  0  0  0  0  0  0  0  0
    6.8800    0.2265   -1.8879 H   0  0  0  0  0  0  0  0  0  0  0  0
   -2.4875   -1.6034    0.4007 N   0  0  0  0  0  0  0  0  0  0  0  0
   -2.5508   -0.3039    0.2921 C   0  0  0  0  0  0  0  0  0  0  0  0
   -1.6222    0.5376    0.7598 N   0  0  0  0  0  0  0  0  0  0  0  0
   -3.7128    0.0144   -0.3715 C   0  0  0  0  0  0  0  0  0  0  0  0
   -3.5810   -2.0609   -0.1726 C   0  0  0  0  0  0  0  0  0  0  0  0
   -4.3278   -1.0929   -0.6440 N   0  0  0  0  0  0  0  0  0  0  0  0
   -4.0594    1.3349   -0.6452 C   0  0  0  0  0  0  0  0  0  0  0  0
   -3.1235    2.2887   -0.1878 C   0  0  0  0  0  0  0  0  0  0  0  0
   -1.9580    1.8466    0.4879 C   0  0  0  0  0  0  0  0  0  0  0  0
   -3.3489    3.6634   -0.4024 N   0  0  0  0  0  0  0  0  0  0  0  0
   -3.8441   -3.1096   -0.2516 H   0  0  0  0  0  0  0  0  0  0  0  0
   -4.9717    1.6064   -1.1682 H   0  0  0  0  0  0  0  0  0  0  0  0
   -1.2475    2.5952    0.8302 H   0  0  0  0  0  0  0  0  0  0  0  0
   -2.6817    4.3572   -0.0750 H   0  0  0  0  0  0  0  0  0  0  0  0
   -4.1840    3.9828   -0.8866 H   0  0  0  0  0  0  0  0  0  0  0  0
   -1.5702   -2.5959    0.9685 C   0  0  0  0  0  0  0  0  0  0  0  0
   -1.5914   -2.4963    2.0582 H   0  0  0  0  0  0  0  0  0  0  0  0
   -0.5668   -2.4048    0.5791 H   0  0  0  0  0  0  0  0  0  0  0  0
   -1.8715   -3.6112    0.6876 H   0  0  0  0  0  0  0  0  0  0  0  0
   -5.6006   -1.2968   -1.3341 C   0  0  0  0  0  0  0  0  0  0  0  0
   -5.5164   -0.8796   -2.3429 H   0  0  0  0  0  0  0  0  0  0  0  0
   -5.8225   -2.3677   -1.3909 H   0  0  0  0  0  0  0  0  0  0  0  0
   -6.3852   -0.7833   -0.7688 H   0  0  0  0  0  0  0  0  0  0  0  0
    2.1401   -0.0709    1.2991 C   0  0  0  0  0  0  0  0  0  0  0  0
    2.0499   -0.9950    1.8800 H   0  0  0  0  0  0  0  0  0  0  0  0
    2.3608    0.7286    2.0140 H   0  0  0  0  0  0  0  0  0  0  0  0
    0.8446    0.2264    0.5287 C   0  0  0  0  0  0  0  0  0  0  0  0
    0.9587    1.1497   -0.0481 H   0  0  0  0  0  0  0  0  0  0  0  0
    0.6580   -0.5618   -0.2070 H   0  0  0  0  0  0  0  0  0  0  0  0
   -0.3544    0.3509    1.4830 C   0  0  0  0  0  0  0  0  0  0  0  0
   -0.4550   -0.5356    2.1128 H   0  0  0  0  0  0  0  0  0  0  0  0
   -0.2163    1.1929    2.1715 H   0  0  0  0  0  0  0  0  0  0  0  0
  1  8  1  0  0  0  0
  2  3  1  0  0  0  0
  2  1  1  1  0  0  0
  3 41  1  0  0  0  0
  4  5  1  0  0  0  0
  4  3  1  0  0  0  0
  5 12  1  0  0  0  0
  6  7  1  0  0  0  0
  6  4  2  0  0  0  0
  7  2  1  0  0  0  0
  9  1  1  0  0  0  0
 10  1  1  0  0  0  0
 11  5  1  0  0  0  0
 13  6  1  0  0  0  0
 14  7  1  0  0  0  0
 14 16  1  0  0  0  0
 15 14  1  0  0  0  0
 17 14  1  0  0  0  0
 18 33  1  0  0  0  0
 19 18  1  0  0  0  0
 19 20  1  0  0  0  0
 20 47  1  0  0  0  0
 21 19  2  0  0  0  0
 22 18  1  0  0  0  0
 23 21  1  0  0  0  0
 23 22  1  0  0  0  0
 24 21  1  0  0  0  0
 24 25  1  0  0  0  0
 25 26  2  0  0  0  0
 26 20  1  0  0  0  0
 26 30  1  0  0  0  0
 27 25  1  0  0  0  0
 27 31  1  0  0  0  0
 28 22  1  0  0  0  0
 29 24  1  0  0  0  0
 32 27  1  0  0  0  0
 33 34  1  0  0  0  0
 35 33  1  0  0  0  0
 36 33  1  0  0  0  0
 37 40  1  0  0  0  0
 37 23  1  0  0  0  0
 38 37  1  0  0  0  0
 39 37  1  0  0  0  0
 41 42  1  0  0  0  0
 41 43  1  0  0  0  0
 44 41  1  0  0  0  0
 44 47  1  0  0  0  0
 45 44  1  0  0  0  0
 46 44  1  0  0  0  0
 47 48  1  0  0  0  0
 47 49  1  0  0  0  0
M  END
>  <energy_and_gap>
-15.111  2.107

$$$$
BEA_40/Syn017372/Syn017372.car
 OpenBabel12061810373D

 53 56  0  0  1  0  0  0  0  0999 V2000
   -3.0103   -2.9408   -0.4864 N   0  0  0  0  0  0  0  0  0  0  0  0
   -2.7025   -1.5913   -0.5175 C   0  0  2  0  0  0  0  0  0  0  0  0
   -1.5567   -1.1216   -0.9874 N   0  0  0  0  0  0  0  0  0  0  0  0
   -1.5771    0.2282   -0.8311 C   0  0  0  0  0  0  0  0  0  0  0  0
   -0.6329    1.1957   -1.1590 C   0  0  0  0  0  0  0  0  0  0  0  0
   -1.0150    2.5079   -0.8046 C   0  0  0  0  0  0  0  0  0  0  0  0
   -0.1497    3.5876   -1.0739 N   0  0  0  0  0  0  0  0  0  0  0  0
   -2.2674    2.7335   -0.1742 C   0  0  0  0  0  0  0  0  0  0  0  0
   -3.2092    1.7843    0.1557 N   0  0  0  0  0  0  0  0  0  0  0  0
   -2.8168    0.5603   -0.2046 C   0  0  0  0  0  0  0  0  0  0  0  0
   -3.4897   -0.6241   -0.0596 N   0  0  0  0  0  0  0  0  0  0  0  0
   -2.3941   -3.6341   -0.8968 H   0  0  0  0  0  0  0  0  0  0  0  0
   -3.8490   -3.2913   -0.0370 H   0  0  0  0  0  0  0  0  0  0  0  0
    0.3129    0.9693   -1.6406 H   0  0  0  0  0  0  0  0  0  0  0  0
   -0.4105    4.5383   -0.8244 H   0  0  0  0  0  0  0  0  0  0  0  0
    0.7487    3.4343   -1.5250 H   0  0  0  0  0  0  0  0  0  0  0  0
   -2.5270    3.7573    0.0840 H   0  0  0  0  0  0  0  0  0  0  0  0
   -4.4228    2.2652    0.8235 C   0  0  0  0  0  0  0  0  0  0  0  0
   -5.2534    2.1980    0.1143 H   0  0  0  0  0  0  0  0  0  0  0  0
   -4.3033    3.3034    1.1500 H   0  0  0  0  0  0  0  0  0  0  0  0
   -4.6055    1.6444    1.7050 H   0  0  0  0  0  0  0  0  0  0  0  0
   -4.8362   -0.7992    0.4980 C   0  0  0  0  0  0  0  0  0  0  0  0
   -5.5017   -0.0526    0.0578 H   0  0  0  0  0  0  0  0  0  0  0  0
   -4.7758   -0.6883    1.5851 H   0  0  0  0  0  0  0  0  0  0  0  0
   -5.2367   -1.7836    0.2468 H   0  0  0  0  0  0  0  0  0  0  0  0
    0.9945   -1.0318    1.4400 C   0  0  2  0  0  0  0  0  0  0  0  0
    1.8857   -0.1418    1.8159 N   0  0  0  0  0  0  0  0  0  0  0  0
    2.7567   -0.0769    0.8467 C   0  0  0  0  0  0  0  0  0  0  0  0
    2.3619   -0.9593   -0.1392 C   0  0  0  0  0  0  0  0  0  0  0  0
    1.2566   -1.5361    0.2514 N   0  0  0  0  0  0  0  0  0  0  0  0
    3.9080    0.7094    0.7233 C   0  0  0  0  0  0  0  0  0  0  0  0
    4.6600    0.5620   -0.4690 C   0  0  0  0  0  0  0  0  0  0  0  0
    4.2532   -0.3431   -1.4776 C   0  0  0  0  0  0  0  0  0  0  0  0
    3.0890   -1.1219   -1.3233 C   0  0  0  0  0  0  0  0  0  0  0  0
    5.8291    1.3285   -0.6531 N   0  0  0  0  0  0  0  0  0  0  0  0
   -0.1125   -1.3713    2.1995 N   0  0  0  0  0  0  0  0  0  0  0  0
    4.2185    1.4042    1.4974 H   0  0  0  0  0  0  0  0  0  0  0  0
    4.8352   -0.4502   -2.3882 H   0  0  0  0  0  0  0  0  0  0  0  0
    2.7861   -1.8104   -2.1048 H   0  0  0  0  0  0  0  0  0  0  0  0
    6.1389    1.9825    0.0610 H   0  0  0  0  0  0  0  0  0  0  0  0
    6.3829    1.2359   -1.5006 H   0  0  0  0  0  0  0  0  0  0  0  0
   -0.7474   -2.1092    1.9169 H   0  0  0  0  0  0  0  0  0  0  0  0
   -0.2883   -0.9298    3.0962 H   0  0  0  0  0  0  0  0  0  0  0  0
    1.8833    0.6137    3.0748 C   0  0  0  0  0  0  0  0  0  0  0  0
    1.8763   -0.0984    3.9065 H   0  0  0  0  0  0  0  0  0  0  0  0
    0.9872    1.2425    3.0970 H   0  0  0  0  0  0  0  0  0  0  0  0
    2.7736    1.2434    3.1476 H   0  0  0  0  0  0  0  0  0  0  0  0
   -0.0645   -3.1572    0.1600 H   0  0  0  0  0  0  0  0  0  0  0  0
    0.4944   -2.5242   -0.5350 C   0  0  0  0  0  0  0  0  0  0  0  0
    1.2170   -3.1809   -1.0303 H   0  0  0  0  0  0  0  0  0  0  0  0
   -0.4404   -1.8807   -1.5809 C   0  0  0  0  0  0  0  0  0  0  0  0
   -0.8769   -2.6540   -2.2209 H   0  0  0  0  0  0  0  0  0  0  0  0
    0.1149   -1.2136   -2.2468 H   0  0  0  0  0  0  0  0  0  0  0  0
  1 13  1  0  0  0  0
  2  1  1  1  0  0  0
  2 11  1  0  0  0  0
  3  4  1  0  0  0  0
  3  2  1  0  0  0  0
  4 10  2  0  0  0  0
  5  4  1  0  0  0  0
  5  6  1  0  0  0  0
  6  8  2  0  0  0  0
  7 15  1  0  0  0  0
  7  6  1  0  0  0  0
  8 17  1  0  0  0  0
  8  9  1  0  0  0  0
  9 18  1  0  0  0  0
 10 11  1  0  0  0  0
 10  9  1  0  0  0  0
 11 22  1  0  0  0  0
 12  1  1  0  0  0  0
 14  5  1  0  0  0  0
 16  7  1  0  0  0  0
 18 20  1  0  0  0  0
 18 21  1  0  0  0  0
 19 18  1  0  0  0  0
 22 24  1  0  0  0  0
 23 22  1  0  0  0  0
 25 22  1  0  0  0  0
 26 27  1  0  0  0  0
 26 36  1  6  0  0  0
 27 44  1  0  0  0  0
 28 27  1  0  0  0  0
 29 30  1  0  0  0  0
 29 28  2  0  0  0  0
 30 26  1  0  0  0  0
 31 28  1  0  0  0  0
 31 37  1  0  0  0  0
 32 31  2  0  0  0  0
 33 34  2  0  0  0  0
 33 32  1  0  0  0  0
 34 29  1  0  0  0  0
 35 32  1  0  0  0  0
 35 40  1  0  0  0  0
 36 43  1  0  0  0  0
 38 33  1  0  0  0  0
 39 34  1  0  0  0  0
 41 35  1  0  0  0  0
 42 36  1  0  0  0  0
 44 46  1  0  0  0  0
 44 47  1  0  0  0  0
 44 45  1  0  0  0  0
 49 48  1  0  0  0  0
 49 30  1  0  0  0  0
 50 49  1  0  0  0  0
 51  3  1  0  0  0  0
 51 49  1  0  0  0  0
 52 51  1  0  0  0  0
 53 51  1  0  0  0  0
M  END
>  <energy_and_gap>
-15.087 83.266

$$$$
BEA_40/Syn026819/Syn026819.car
 OpenBabel12061810373D

 52 54  0  0  1  0  0  0  0  0999 V2000
   -3.4805   -2.6229    1.0406 N   0  0  0  0  0  0  0  0  0  0  0  0
   -3.1435   -1.4146    0.4546 C   0  0  2  0  0  0  0  0  0  0  0  0
   -2.1291   -1.2731   -0.3830 N   0  0  0  0  0  0  0  0  0  0  0  0
   -2.0837    0.0339   -0.7526 C   0  0  0  0  0  0  0  0  0  0  0  0
   -1.1939    0.6943   -1.5977 C   0  0  0  0  0  0  0  0  0  0  0  0
   -1.4239    2.0727   -1.7757 C   0  0  0  0  0  0  0  0  0  0  0  0
   -2.4995    2.7380   -1.1486 C   0  0  0  0  0  0  0  0  0  0  0  0
   -3.4132    2.0621   -0.2962 C   0  0  0  0  0  0  0  0  0  0  0  0
   -4.4898    2.7817    0.2650 N   0  0  0  0  0  0  0  0  0  0  0  0
   -3.1682    0.6909   -0.0964 C   0  0  0  0  0  0  0  0  0  0  0  0
   -3.7774   -0.2685    0.6678 N   0  0  0  0  0  0  0  0  0  0  0  0
   -2.8882   -3.4402    0.9422 H   0  0  0  0  0  0  0  0  0  0  0  0
   -4.3345   -2.7415    1.5738 H   0  0  0  0  0  0  0  0  0  0  0  0
   -0.3681    0.1966   -2.0934 H   0  0  0  0  0  0  0  0  0  0  0  0
   -0.7599    2.6378   -2.4213 H   0  0  0  0  0  0  0  0  0  0  0  0
   -2.6253    3.7990   -1.3430 H   0  0  0  0  0  0  0  0  0  0  0  0
   -4.5429    3.7905    0.1522 H   0  0  0  0  0  0  0  0  0  0  0  0
   -5.2653    2.3191    0.7242 H   0  0  0  0  0  0  0  0  0  0  0  0
   -4.9069   -0.0601    1.5818 C   0  0  0  0  0  0  0  0  0  0  0  0
   -5.0459   -0.9221    2.2371 H   0  0  0  0  0  0  0  0  0  0  0  0
   -5.8093    0.0975    0.9828 H   0  0  0  0  0  0  0  0  0  0  0  0
   -4.6891    0.8058    2.2140 H   0  0  0  0  0  0  0  0  0  0  0  0
    1.5294    0.7329    1.6364 C   0  0  0  0  0  0  0  0  0  0  0  0
    2.8282    0.4104    0.9595 C   0  0  0  0  0  0  0  0  0  0  0  0
    3.8924    1.2956    0.6787 C   0  0  0  0  0  0  0  0  0  0  0  0
    3.9457    2.6406    0.9764 N   0  0  0  0  0  0  0  0  0  0  0  0
    4.8619    0.5885    0.0612 N   0  0  0  0  0  0  0  0  0  0  0  0
    4.4123   -0.6485   -0.0337 C   0  0  0  0  0  0  0  0  0  0  0  0
    3.2029   -0.8023    0.4804 N   0  0  0  0  0  0  0  0  0  0  0  0
    0.9484    1.4239    1.0191 H   0  0  0  0  0  0  0  0  0  0  0  0
    0.9322   -0.1651    1.8069 H   0  0  0  0  0  0  0  0  0  0  0  0
    1.7201    1.1985    2.6077 H   0  0  0  0  0  0  0  0  0  0  0  0
    4.7625    3.1919    0.7324 H   0  0  0  0  0  0  0  0  0  0  0  0
    3.1785    3.1141    1.4446 H   0  0  0  0  0  0  0  0  0  0  0  0
    4.9750   -1.4525   -0.4915 H   0  0  0  0  0  0  0  0  0  0  0  0
    6.1615    1.0388   -0.4294 C   0  0  0  0  0  0  0  0  0  0  0  0
    6.6992    0.1957   -0.8755 H   0  0  0  0  0  0  0  0  0  0  0  0
    5.9929    1.8161   -1.1815 H   0  0  0  0  0  0  0  0  0  0  0  0
    6.7278    1.4380    0.4180 H   0  0  0  0  0  0  0  0  0  0  0  0
    1.7515   -1.9942   -1.9584 C   0  0  0  0  0  0  0  0  0  0  0  0
    2.0990   -0.9818   -2.1829 H   0  0  0  0  0  0  0  0  0  0  0  0
    0.9315   -2.2230   -2.6411 H   0  0  0  0  0  0  0  0  0  0  0  0
    2.5582   -2.6947   -2.1935 H   0  0  0  0  0  0  0  0  0  0  0  0
    1.3637   -2.1124   -0.5106 C   0  0  0  0  0  0  0  0  0  0  0  0
    2.5000   -2.0886    0.4789 C   0  0  0  0  0  0  0  0  0  0  0  0
    3.2206   -2.8829    0.2520 H   0  0  0  0  0  0  0  0  0  0  0  0
    2.1564   -2.2587    1.5054 H   0  0  0  0  0  0  0  0  0  0  0  0
    0.0861   -2.2655   -0.0614 C   0  0  0  0  0  0  0  0  0  0  0  0
   -0.0649   -2.3815    1.0070 H   0  0  0  0  0  0  0  0  0  0  0  0
   -1.1746   -2.2799   -0.8752 C   0  0  0  0  0  0  0  0  0  0  0  0
   -1.0119   -2.0860   -1.9381 H   0  0  0  0  0  0  0  0  0  0  0  0
   -1.6456   -3.2648   -0.8144 H   0  0  0  0  0  0  0  0  0  0  0  0
  1 13  1  0  0  0  0
  2 11  1  0  0  0  0
  2  1  1  1  0  0  0
  3  2  1  0  0  0  0
  4  3  1  0  0  0  0
  4 10  1  0  0  0  0
  5  4  2  0  0  0  0
  6  5  1  0  0  0  0
  6  7  2  0  0  0  0
  7  8  1  0  0  0  0
  8 10  2  0  0  0  0
  8  9  1  0  0  0  0
  9 18  1  0  0  0  0
 10 11  1  0  0  0  0
 11 19  1  0  0  0  0
 12  1  1  0  0  0  0
 14  5  1  0  0  0  0
 15  6  1  0  0  0  0
 16  7  1  0  0  0  0
 17  9  1  0  0  0  0
 19 22  1  0  0  0  0
 19 20  1  0  0  0  0
 21 19  1  0  0  0  0
 23 31  1  0  0  0  0
 23 32  1  0  0  0  0
 24 23  1  0  0  0  0
 25 24  2  0  0  0  0
 25 26  1  0  0  0  0
 26 34  1  0  0  0  0
 27 25  1  0  0  0  0
 28 27  1  0  0  0  0
 28 29  1  0  0  0  0
 29 24  1  0  0  0  0
 30 23  1  0  0  0  0
 33 26  1  0  0  0  0
 35 28  1  0  0  0  0
 36 27  1  0  0  0  0
 36 39  1  0  0  0  0
 37 36  1  0  0  0  0
 38 36  1  0  0  0  0
 40 44  1  0  0  0  0
 41 40  1  0  0  0  0
 42 40  1  0  0  0  0
 43 40  1  0  0  0  0
 44 48  2  0  0  0  0
 44 45  1  0  0  0  0
 45 29  1  0  0  0  0
 45 47  1  0  0  0  0
 46 45  1  0  0  0  0
 48 49  1  0  0  0  0
 50 52  1  0  0  0  0
 50  3  1  0  0  0  0
 50 48  1  0  0  0  0
 51 50  1  0  0  0  0
M  END
>  <energy_and_gap>
-15.052 78.887

$$$$
BEA_40/Syn028770/Syn028770.car
 OpenBabel12061810373D

 47 49  0  0  1  0  0  0  0  0999 V2000
   -1.1889   -0.9802    1.8509 N   0  0  0  0  0  0  0  0  0  0  0  0
   -0.2231   -0.2233    1.2143 C   0  0  1  0  0  0  0  0  0  0  0  0
    0.9505   -0.6893    0.7966 N   0  0  0  0  0  0  0  0  0  0  0  0
    1.6356    0.3659    0.2615 C   0  0  0  0  0  0  0  0  0  0  0  0
    0.7647    1.4725    0.3427 C   0  0  0  0  0  0  0  0  0  0  0  0
   -0.3720    1.0637    0.9475 N   0  0  0  0  0  0  0  0  0  0  0  0
    2.9891    0.2488   -0.2763 C   0  0  0  0  0  0  0  0  0  0  0  0
    3.2973    0.7283   -1.5728 C   0  0  0  0  0  0  0  0  0  0  0  0
    4.6126    0.6247   -2.0623 C   0  0  0  0  0  0  0  0  0  0  0  0
    5.5899    0.0500   -1.2320 C   0  0  0  0  0  0  0  0  0  0  0  0
    5.3368   -0.4097    0.0215 N   0  0  0  0  0  0  0  0  0  0  0  0
    4.0585   -0.2998    0.4773 C   0  0  0  0  0  0  0  0  0  0  0  0
   -1.0339   -1.9572    2.0768 H   0  0  0  0  0  0  0  0  0  0  0  0
   -2.0640   -0.5681    2.1547 H   0  0  0  0  0  0  0  0  0  0  0  0
    0.8234    2.5136    0.0527 H   0  0  0  0  0  0  0  0  0  0  0  0
    2.5325    1.1713   -2.2037 H   0  0  0  0  0  0  0  0  0  0  0  0
    4.8668    0.9806   -3.0551 H   0  0  0  0  0  0  0  0  0  0  0  0
    6.6116   -0.0396   -1.5890 H   0  0  0  0  0  0  0  0  0  0  0  0
    3.8863   -0.6622    1.4877 H   0  0  0  0  0  0  0  0  0  0  0  0
    1.3648   -2.0949    0.8980 C   0  0  0  0  0  0  0  0  0  0  0  0
    2.1553   -2.3043    0.1726 H   0  0  0  0  0  0  0  0  0  0  0  0
    0.5134   -2.7417    0.6641 H   0  0  0  0  0  0  0  0  0  0  0  0
    1.7204   -2.2753    1.9174 H   0  0  0  0  0  0  0  0  0  0  0  0
    6.3655   -0.9980    0.8782 C   0  0  0  0  0  0  0  0  0  0  0  0
    6.0490   -2.0085    1.1573 H   0  0  0  0  0  0  0  0  0  0  0  0
    6.4763   -0.3684    1.7672 H   0  0  0  0  0  0  0  0  0  0  0  0
    7.3158   -1.0459    0.3367 H   0  0  0  0  0  0  0  0  0  0  0  0
   -3.2103    1.0434   -0.3125 N   0  0  0  0  0  0  0  0  0  0  0  0
   -2.9917    0.1063   -1.2620 C   0  0  0  0  0  0  0  0  0  0  0  0
   -4.0597   -0.8054   -1.1639 C   0  0  0  0  0  0  0  0  0  0  0  0
   -4.8786   -0.3836   -0.1774 N   0  0  0  0  0  0  0  0  0  0  0  0
   -4.3379    0.7217    0.2977 C   0  0  0  0  0  0  0  0  0  0  0  0
   -4.2360   -1.9297   -1.9390 N   0  0  0  0  0  0  0  0  0  0  0  0
   -2.1064    0.2165   -1.8739 H   0  0  0  0  0  0  0  0  0  0  0  0
   -4.7677    1.3037    1.1034 H   0  0  0  0  0  0  0  0  0  0  0  0
   -5.0397   -2.5343   -1.7997 H   0  0  0  0  0  0  0  0  0  0  0  0
   -3.5741   -2.1786   -2.6688 H   0  0  0  0  0  0  0  0  0  0  0  0
   -6.1186   -0.9813    0.3093 C   0  0  0  0  0  0  0  0  0  0  0  0
   -6.5260   -0.3722    1.1229 H   0  0  0  0  0  0  0  0  0  0  0  0
   -5.8934   -1.9893    0.6719 H   0  0  0  0  0  0  0  0  0  0  0  0
   -6.8295   -1.0201   -0.5222 H   0  0  0  0  0  0  0  0  0  0  0  0
   -1.0053    2.9692    1.4844 H   0  0  0  0  0  0  0  0  0  0  0  0
   -1.4636    2.0150    1.2015 C   0  0  0  0  0  0  0  0  0  0  0  0
   -2.0237    1.6614    2.0727 H   0  0  0  0  0  0  0  0  0  0  0  0
   -2.3871    2.2168   -0.0139 C   0  0  0  0  0  0  0  0  0  0  0  0
   -1.8122    2.4566   -0.9152 H   0  0  0  0  0  0  0  0  0  0  0  0
   -3.0745    3.0495    0.1711 H   0  0  0  0  0  0  0  0  0  0  0  0
  1 13  1  0  0  0  0
  1 14  1  0  0  0  0
  2  1  1  6  0  0  0
  3 20  1  0  0  0  0
  3  2  1  0  0  0  0
  4  5  2  0  0  0  0
  4  3  1  0  0  0  0
  5  6  1  0  0  0  0
  6 43  1  0  0  0  0
  6  2  1  0  0  0  0
  7  4  1  0  0  0  0
  7 12  2  0  0  0  0
  8  7  1  0  0  0  0
  9  8  1  0  0  0  0
  9 10  2  0  0  0  0
 10 11  1  0  0  0  0
 11 12  1  0  0  0  0
 11 24  1  0  0  0  0
 12 19  1  0  0  0  0
 15  5  1  0  0  0  0
 16  8  1  0  0  0  0
 17  9  1  0  0  0  0
 18 10  1  0  0  0  0
 20 23  1  0  0  0  0
 21 20  1  0  0  0  0
 22 20  1  0  0  0  0
 24 25  1  0  0  0  0
 24 26  1  0  0  0  0
 27 24  1  0  0  0  0
 28 45  1  0  0  0  0
 28 32  1  0  0  0  0
 29 30  2  0  0  0  0
 29 28  1  0  0  0  0
 30 31  1  0  0  0  0
 31 32  1  0  0  0  0
 31 38  1  0  0  0  0
 32 35  1  0  0  0  0
 33 36  1  0  0  0  0
 33 30  1  0  0  0  0
 34 29  1  0  0  0  0
 37 33  1  0  0  0  0
 38 40  1  0  0  0  0
 38 39  1  0  0  0  0
 41 38  1  0  0  0  0
 43 42  1  0  0  0  0
 43 44  1  0  0  0  0
 45 47  1  0  0  0  0
 45 43  1  0  0  0  0
 46 45  1  0  0  0  0
M  END
>  <energy_and_gap>
-15.449 68.429

$$$$
BEA_40/Syn032464/Syn032464.car
 OpenBabel12061810373D

 54 56  0  0  0  0  0  0  0  0999 V2000
    3.8054    1.9073    0.1145 N   0  0  0  0  0  0  0  0  0  0  0  0
    4.6407    0.7995   -0.1694 C   0  0  0  0  0  0  0  0  0  0  0  0
    4.1368   -0.5415   -0.2591 C   0  0  0  0  0  0  0  0  0  0  0  0
    5.0524   -1.5921   -0.5277 C   0  0  0  0  0  0  0  0  0  0  0  0
    6.4232   -1.3314   -0.7001 C   0  0  0  0  0  0  0  0  0  0  0  0
    6.9076   -0.0167   -0.6134 C   0  0  0  0  0  0  0  0  0  0  0  0
    6.0244    1.0440   -0.3507 C   0  0  0  0  0  0  0  0  0  0  0  0
    0.9481   -1.7416    0.7394 C   0  0  0  0  0  0  0  0  0  0  0  0
    2.2570   -1.6645    0.8779 N   0  0  0  0  0  0  0  0  0  0  0  0
    2.7182   -0.8611   -0.1194 C   0  0  0  0  0  0  0  0  0  0  0  0
    1.5796   -0.4706   -0.8596 C   0  0  0  0  0  0  0  0  0  0  0  0
    0.5032   -1.0365   -0.2776 N   0  0  0  0  0  0  0  0  0  0  0  0
    2.8272    1.7964    0.3628 H   0  0  0  0  0  0  0  0  0  0  0  0
    4.1886    2.8490    0.1191 H   0  0  0  0  0  0  0  0  0  0  0  0
    4.7063   -2.6179   -0.6122 H   0  0  0  0  0  0  0  0  0  0  0  0
    7.1081   -2.1475   -0.9050 H   0  0  0  0  0  0  0  0  0  0  0  0
    7.9657    0.1805   -0.7486 H   0  0  0  0  0  0  0  0  0  0  0  0
    6.4245    2.0513   -0.2845 H   0  0  0  0  0  0  0  0  0  0  0  0
    0.2998   -2.3117    1.3932 H   0  0  0  0  0  0  0  0  0  0  0  0
    1.3975    0.1528   -1.7247 H   0  0  0  0  0  0  0  0  0  0  0  0
    2.9382   -2.3606    1.9697 C   0  0  0  0  0  0  0  0  0  0  0  0
    2.2293   -2.5636    2.7796 H   0  0  0  0  0  0  0  0  0  0  0  0
    3.7433   -1.7217    2.3457 H   0  0  0  0  0  0  0  0  0  0  0  0
    3.3433   -3.2981    1.5757 H   0  0  0  0  0  0  0  0  0  0  0  0
   -5.9447    0.0485   -0.3684 N   0  0  0  0  0  0  0  0  0  0  0  0
   -5.8680   -1.2169   -0.8302 C   0  0  0  0  0  0  0  0  0  0  0  0
   -4.6525   -1.7358   -0.3444 C   0  0  0  0  0  0  0  0  0  0  0  0
   -4.0461   -0.7709    0.3835 N   0  0  0  0  0  0  0  0  0  0  0  0
   -4.8557    0.2730    0.3417 C   0  0  0  0  0  0  0  0  0  0  0  0
   -4.1733   -3.0065   -0.5759 N   0  0  0  0  0  0  0  0  0  0  0  0
   -6.6886   -1.5727   -1.4391 H   0  0  0  0  0  0  0  0  0  0  0  0
   -4.6505    1.2154    0.8344 H   0  0  0  0  0  0  0  0  0  0  0  0
   -4.6940   -3.6700   -1.1430 H   0  0  0  0  0  0  0  0  0  0  0  0
   -3.2915   -3.3136   -0.1792 H   0  0  0  0  0  0  0  0  0  0  0  0
   -7.0052    1.0268   -0.5819 C   0  0  0  0  0  0  0  0  0  0  0  0
   -7.7811    0.5834   -1.2141 H   0  0  0  0  0  0  0  0  0  0  0  0
   -7.4247    1.2997    0.3920 H   0  0  0  0  0  0  0  0  0  0  0  0
   -6.5730    1.9027   -1.0767 H   0  0  0  0  0  0  0  0  0  0  0  0
    0.3489    3.8966   -0.5748 N   0  0  0  0  0  0  0  0  0  0  0  0
    0.4929    4.8888   -0.4066 H   0  0  0  0  0  0  0  0  0  0  0  0
    0.9259    3.4938   -1.3081 H   0  0  0  0  0  0  0  0  0  0  0  0
   -0.5611    3.1350    0.1304 C   0  0  0  0  0  0  0  0  0  0  0  0
   -1.2849    3.8126    1.1060 N   0  0  0  0  0  0  0  0  0  0  0  0
   -1.1598    4.8038    1.2936 H   0  0  0  0  0  0  0  0  0  0  0  0
   -1.9805    3.3569    1.6892 H   0  0  0  0  0  0  0  0  0  0  0  0
   -0.6841    1.7892   -0.1715 N   0  0  0  0  0  0  0  0  0  0  0  0
   -1.5292    1.1962    0.5151 N   0  0  0  0  0  0  0  0  0  0  0  0
   -1.6951   -0.0720    0.3162 C   0  0  0  0  0  0  0  0  0  0  0  0
   -0.8947   -0.8834   -0.6843 C   0  0  0  0  0  0  0  0  0  0  0  0
   -0.9183   -0.4223   -1.6784 H   0  0  0  0  0  0  0  0  0  0  0  0
   -1.3017   -1.8941   -0.7941 H   0  0  0  0  0  0  0  0  0  0  0  0
   -2.7771   -0.7399    1.1159 C   0  0  0  0  0  0  0  0  0  0  0  0
   -2.9554   -0.2241    2.0675 H   0  0  0  0  0  0  0  0  0  0  0  0
   -2.5028   -1.7700    1.3643 H   0  0  0  0  0  0  0  0  0  0  0  0
  1 14  1  0  0  0  0
  1 13  1  0  0  0  0
  2  1  1  0  0  0  0
  3  2  1  0  0  0  0
  3 10  1  0  0  0  0
  4  3  2  0  0  0  0
  5  6  2  0  0  0  0
  5  4  1  0  0  0  0
  6  7  1  0  0  0  0
  7 18  1  0  0  0  0
  7  2  2  0  0  0  0
  8  9  1  0  0  0  0
  8 19  1  0  0  0  0
  9 21  1  0  0  0  0
 10  9  1  0  0  0  0
 11 12  1  0  0  0  0
 11 10  2  0  0  0  0
 12  8  1  0  0  0  0
 15  4  1  0  0  0  0
 16  5  1  0  0  0  0
 17  6  1  0  0  0  0
 20 11  1  0  0  0  0
 21 23  1  0  0  0  0
 21 22  1  0  0  0  0
 24 21  1  0  0  0  0
 25 29  1  0  0  0  0
 26 25  1  0  0  0  0
 26 27  2  0  0  0  0
 27 28  1  0  0  0  0
 28 52  1  0  0  0  0
 29 28  1  0  0  0  0
 29 32  1  0  0  0  0
 30 27  1  0  0  0  0
 30 34  1  0  0  0  0
 31 26  1  0  0  0  0
 33 30  1  0  0  0  0
 35 25  1  0  0  0  0
 35 37  1  0  0  0  0
 36 35  1  0  0  0  0
 38 35  1  0  0  0  0
 39 40  1  0  0  0  0
 39 42  2  0  0  0  0
 41 39  1  0  0  0  0
 42 43  1  0  0  0  0
 43 44  1  0  0  0  0
 43 45  1  0  0  0  0
 46 42  1  0  0  0  0
 46 47  1  0  0  0  0
 48 47  2  0  0  0  0
 48 52  1  0  0  0  0
 49 12  1  0  0  0  0
 49 48  1  0  0  0  0
 50 49  1  0  0  0  0
 51 49  1  0  0  0  0
 52 54  1  0  0  0  0
 52 53  1  0  0  0  0
M  RAD  1  46   2
M  END
>  <energy_and_gap>
-15.380 65.592

$$$$
BEA_40/Syn065206/Syn065206.car
 OpenBabel12061810373D

 50 52  0  0  1  0  0  0  0  0999 V2000
    0.5006   -0.6345    2.1113 N   0  0  0  0  0  0  0  0  0  0  0  0
   -0.5604   -0.8702    1.2564 C   0  0  2  0  0  0  0  0  0  0  0  0
   -0.5216   -1.7666    0.2842 N   0  0  0  0  0  0  0  0  0  0  0  0
   -1.7079   -1.7042   -0.3564 C   0  0  0  0  0  0  0  0  0  0  0  0
   -2.4814   -0.7017    0.2644 C   0  0  0  0  0  0  0  0  0  0  0  0
   -1.7218   -0.2249    1.2961 N   0  0  0  0  0  0  0  0  0  0  0  0
   -3.8208   -0.2035   -0.0319 C   0  0  0  0  0  0  0  0  0  0  0  0
   -4.9097   -1.1068   -0.1148 C   0  0  0  0  0  0  0  0  0  0  0  0
   -6.2033   -0.6430   -0.4196 C   0  0  0  0  0  0  0  0  0  0  0  0
   -6.4304    0.7245   -0.6549 C   0  0  0  0  0  0  0  0  0  0  0  0
   -5.3526    1.6354   -0.5889 C   0  0  0  0  0  0  0  0  0  0  0  0
   -5.5753    3.0062   -0.8313 N   0  0  0  0  0  0  0  0  0  0  0  0
   -4.0507    1.1743   -0.2831 C   0  0  0  0  0  0  0  0  0  0  0  0
    1.3561   -1.1751    2.0431 H   0  0  0  0  0  0  0  0  0  0  0  0
    0.4624    0.0932    2.8170 H   0  0  0  0  0  0  0  0  0  0  0  0
   -1.8542   -2.3735   -1.1938 H   0  0  0  0  0  0  0  0  0  0  0  0
   -4.7650   -2.1685    0.0621 H   0  0  0  0  0  0  0  0  0  0  0  0
   -7.0295   -1.3437   -0.4740 H   0  0  0  0  0  0  0  0  0  0  0  0
   -7.4352    1.0633   -0.8887 H   0  0  0  0  0  0  0  0  0  0  0  0
   -4.8091    3.6726   -0.7867 H   0  0  0  0  0  0  0  0  0  0  0  0
   -6.5067    3.3480   -1.0531 H   0  0  0  0  0  0  0  0  0  0  0  0
   -3.2242    1.8790   -0.2445 H   0  0  0  0  0  0  0  0  0  0  0  0
   -2.0715    0.7887    2.2999 C   0  0  0  0  0  0  0  0  0  0  0  0
   -1.6068    1.7357    2.0073 H   0  0  0  0  0  0  0  0  0  0  0  0
   -3.1577    0.8973    2.3579 H   0  0  0  0  0  0  0  0  0  0  0  0
   -1.7103    0.4656    3.2812 H   0  0  0  0  0  0  0  0  0  0  0  0
    5.8770    1.1649    0.2858 N   0  0  0  0  0  0  0  0  0  0  0  0
    4.8195    1.9774    0.0766 C   0  0  0  0  0  0  0  0  0  0  0  0
    3.8777    1.2134   -0.6385 C   0  0  0  0  0  0  0  0  0  0  0  0
    4.3985   -0.0202   -0.8303 N   0  0  0  0  0  0  0  0  0  0  0  0
    5.5910   -0.0005   -0.2628 C   0  0  0  0  0  0  0  0  0  0  0  0
    2.6412    1.6500   -1.0616 N   0  0  0  0  0  0  0  0  0  0  0  0
    4.8842    2.9852    0.4656 H   0  0  0  0  0  0  0  0  0  0  0  0
    6.2645   -0.8482   -0.2460 H   0  0  0  0  0  0  0  0  0  0  0  0
    2.0228    1.0351   -1.5805 H   0  0  0  0  0  0  0  0  0  0  0  0
    2.3235    2.5967   -0.8732 H   0  0  0  0  0  0  0  0  0  0  0  0
    7.0993    1.5313    0.9921 C   0  0  0  0  0  0  0  0  0  0  0  0
    7.5617    2.3727    0.4660 H   0  0  0  0  0  0  0  0  0  0  0  0
    6.8335    1.8145    2.0156 H   0  0  0  0  0  0  0  0  0  0  0  0
    7.7813    0.6747    1.0039 H   0  0  0  0  0  0  0  0  0  0  0  0
    0.5295   -2.7012   -0.1329 C   0  0  0  0  0  0  0  0  0  0  0  0
    0.0662   -3.5308   -0.6778 H   0  0  0  0  0  0  0  0  0  0  0  0
    0.9775   -3.1204    0.7746 H   0  0  0  0  0  0  0  0  0  0  0  0
    1.5415   -2.0202   -0.9976 C   0  0  0  0  0  0  0  0  0  0  0  0
    1.1985   -1.6196   -1.9457 H   0  0  0  0  0  0  0  0  0  0  0  0
    2.8394   -1.8891   -0.6491 C   0  0  0  0  0  0  0  0  0  0  0  0
    3.1858   -2.3007    0.2931 H   0  0  0  0  0  0  0  0  0  0  0  0
    3.8468   -1.1948   -1.5084 C   0  0  0  0  0  0  0  0  0  0  0  0
    4.6695   -1.8765   -1.7500 H   0  0  0  0  0  0  0  0  0  0  0  0
    3.4141   -0.8503   -2.4542 H   0  0  0  0  0  0  0  0  0  0  0  0
  1 15  1  0  0  0  0
  2  6  1  0  0  0  0
  2  1  1  6  0  0  0
  3  2  1  0  0  0  0
  4  5  2  0  0  0  0
  4  3  1  0  0  0  0
  5  6  1  0  0  0  0
  6 23  1  0  0  0  0
  7  5  1  0  0  0  0
  8  7  1  0  0  0  0
  8 17  1  0  0  0  0
  9  8  2  0  0  0  0
 10 11  2  0  0  0  0
 10  9  1  0  0  0  0
 11 13  1  0  0  0  0
 12 20  1  0  0  0  0
 12 11  1  0  0  0  0
 13 22  1  0  0  0  0
 13  7  2  0  0  0  0
 14  1  1  0  0  0  0
 16  4  1  0  0  0  0
 18  9  1  0  0  0  0
 19 10  1  0  0  0  0
 21 12  1  0  0  0  0
 23 25  1  0  0  0  0
 23 26  1  0  0  0  0
 24 23  1  0  0  0  0
 27 37  1  0  0  0  0
 28 27  1  0  0  0  0
 28 33  1  0  0  0  0
 29 28  2  0  0  0  0
 30 29  1  0  0  0  0
 30 31  1  0  0  0  0
 31 34  1  0  0  0  0
 31 27  1  0  0  0  0
 32 36  1  0  0  0  0
 32 29  1  0  0  0  0
 35 32  1  0  0  0  0
 37 40  1  0  0  0  0
 37 39  1  0  0  0  0
 38 37  1  0  0  0  0
 41  3  1  0  0  0  0
 41 43  1  0  0  0  0
 42 41  1  0  0  0  0
 44 46  2  0  0  0  0
 44 41  1  0  0  0  0
 45 44  1  0  0  0  0
 46 47  1  0  0  0  0
 48 30  1  0  0  0  0
 48 46  1  0  0  0  0
 49 48  1  0  0  0  0
 50 48  1  0  0  0  0
M  END
>  <energy_and_gap>
-16.089 55.377

$$$$
BEA_40/Syn089418/Syn089418.car
 OpenBabel12061810373D

 47 50  0  0  1  0  0  0  0  0999 V2000
   -2.9040    3.6329   -0.0000 N   0  0  0  0  0  0  0  0  0  0  0  0
   -3.0219    2.2275   -0.0000 C   0  0  0  0  0  0  0  0  0  0  0  0
   -4.3051    1.6342   -0.0000 C   0  0  0  0  0  0  0  0  0  0  0  0
   -4.4736    0.2257   -0.0000 C   0  0  0  0  0  0  0  0  0  0  0  0
   -5.8528   -0.3701   -0.0000 C   0  0  0  0  0  0  0  0  0  0  0  0
   -3.2887   -0.5350    0.0000 C   0  0  0  0  0  0  0  0  0  0  0  0
   -3.1114   -1.8252    0.0000 N   0  0  0  0  0  0  0  0  0  0  0  0
   -1.8182   -2.0290    0.0000 C   0  0  0  0  0  0  0  0  0  0  0  0
   -1.1449   -0.9036    0.0000 N   0  0  0  0  0  0  0  0  0  0  0  0
   -2.0358    0.0477    0.0000 C   0  0  0  0  0  0  0  0  0  0  0  0
   -1.8543    1.4316    0.0000 C   0  0  0  0  0  0  0  0  0  0  0  0
   -1.9903    4.0785    0.0000 H   0  0  0  0  0  0  0  0  0  0  0  0
   -3.7322    4.2227   -0.0000 H   0  0  0  0  0  0  0  0  0  0  0  0
   -5.1861    2.2701   -0.0000 H   0  0  0  0  0  0  0  0  0  0  0  0
   -6.0062   -0.9807   -0.8944 H   0  0  0  0  0  0  0  0  0  0  0  0
   -6.6213    0.4090   -0.0000 H   0  0  0  0  0  0  0  0  0  0  0  0
   -6.0062   -0.9807    0.8944 H   0  0  0  0  0  0  0  0  0  0  0  0
   -1.3646   -3.0137    0.0000 H   0  0  0  0  0  0  0  0  0  0  0  0
   -0.8688    1.8828    0.0000 H   0  0  0  0  0  0  0  0  0  0  0  0
   -4.0234   -2.9713   -0.0000 C   0  0  0  0  0  0  0  0  0  0  0  0
   -3.4589   -3.9102    0.0000 H   0  0  0  0  0  0  0  0  0  0  0  0
   -4.6421   -2.9193    0.9011 H   0  0  0  0  0  0  0  0  0  0  0  0
   -4.6421   -2.9193   -0.9011 H   0  0  0  0  0  0  0  0  0  0  0  0
    4.1815   -0.4391   -0.0000 C   0  0  2  0  0  0  0  0  0  0  0  0
    5.4111    0.0504   -0.0000 N   0  0  0  0  0  0  0  0  0  0  0  0
    5.3052    1.3941   -0.0000 C   0  0  0  0  0  0  0  0  0  0  0  0
    3.9352    1.6961    0.0000 C   0  0  0  0  0  0  0  0  0  0  0  0
    3.2582    0.5182    0.0000 N   0  0  0  0  0  0  0  0  0  0  0  0
    3.9134   -1.7925   -0.0000 N   0  0  0  0  0  0  0  0  0  0  0  0
    6.2204    1.9704   -0.0000 H   0  0  0  0  0  0  0  0  0  0  0  0
    3.3712    2.6193    0.0000 H   0  0  0  0  0  0  0  0  0  0  0  0
    4.6677   -2.4713    0.0000 H   0  0  0  0  0  0  0  0  0  0  0  0
    2.9659   -2.1488   -0.0000 H   0  0  0  0  0  0  0  0  0  0  0  0
    6.6944   -0.6521   -0.0000 C   0  0  0  0  0  0  0  0  0  0  0  0
    7.5158    0.0718   -0.0000 H   0  0  0  0  0  0  0  0  0  0  0  0
    6.7460   -1.2727    0.9003 H   0  0  0  0  0  0  0  0  0  0  0  0
    6.7460   -1.2727   -0.9003 H   0  0  0  0  0  0  0  0  0  0  0  0
    0.3288   -1.0144    0.0000 C   0  0  2  0  0  0  0  0  0  0  0  0
    0.6342   -2.0678    0.0000 H   0  0  0  0  0  0  0  0  0  0  0  0
    1.0591   -0.2055    1.0934 C   0  0  0  0  0  0  0  0  0  0  0  0
    0.4002    0.4029    1.7207 H   0  0  0  0  0  0  0  0  0  0  0  0
    1.7234   -0.8167    1.7121 H   0  0  0  0  0  0  0  0  0  0  0  0
    1.7823    0.6082    0.0000 C   0  0  2  0  0  0  0  0  0  0  0  0
    1.4623    1.6566    0.0000 H   0  0  0  0  0  0  0  0  0  0  0  0
    1.0591   -0.2055   -1.0934 C   0  0  0  0  0  0  0  0  0  0  0  0
    0.4002    0.4029   -1.7207 H   0  0  0  0  0  0  0  0  0  0  0  0
    1.7234   -0.8167   -1.7121 H   0  0  0  0  0  0  0  0  0  0  0  0
  1  2  1  0  0  0  0
  1 12  1  0  0  0  0
  2 11  2  0  0  0  0
  3  4  2  0  0  0  0
  3  2  1  0  0  0  0
  4  6  1  0  0  0  0
  5  4  1  0  0  0  0
  5 17  1  0  0  0  0
  6  7  1  0  0  0  0
  6 10  2  0  0  0  0
  7  8  1  0  0  0  0
  8 18  1  0  0  0  0
  8  9  1  0  0  0  0
 10 11  1  0  0  0  0
 10  9  1  0  0  0  0
 11 19  1  0  0  0  0
 13  1  1  0  0  0  0
 14  3  1  0  0  0  0
 15  5  1  0  0  0  0
 16  5  1  0  0  0  0
 20  7  1  0  0  0  0
 20 21  1  0  0  0  0
 20 22  1  0  0  0  0
 23 20  1  0  0  0  0
 24 29  1  1  0  0  0
 24 28  1  0  0  0  0
 25 24  1  0  0  0  0
 25 26  1  0  0  0  0
 26 27  2  0  0  0  0
 27 31  1  0  0  0  0
 28 27  1  0  0  0  0
 28 43  1  0  0  0  0
 29 33  1  0  0  0  0
 29 32  1  0  0  0  0
 30 26  1  0  0  0  0
 34 25  1  0  0  0  0
 34 36  1  0  0  0  0
 35 34  1  0  0  0  0
 37 34  1  0  0  0  0
 38 39  1  6  0  0  0
 38  9  1  0  0  0  0
 38 40  1  0  0  0  0
 40 42  1  0  0  0  0
 40 41  1  0  0  0  0
 43 44  1  1  0  0  0
 43 40  1  0  0  0  0
 45 38  1  0  0  0  0
 45 43  1  0  0  0  0
 46 45  1  0  0  0  0
 47 45  1  0  0  0  0
M  END
>  <energy_and_gap>
-15.149 54.937

$$$$
BEA_40/Syn085891/Syn085891.car
 OpenBabel12061810373D

 49 52  0  0  1  0  0  0  0  0999 V2000
   -3.1517   -3.3779   -0.0000 N   0  0  0  0  0  0  0  0  0  0  0  0
   -3.3183   -1.9729   -0.0000 C   0  0  0  0  0  0  0  0  0  0  0  0
   -4.6137   -1.3550   -0.0000 C   0  0  0  0  0  0  0  0  0  0  0  0
   -5.8111   -2.1087    0.0000 N   0  0  0  0  0  0  0  0  0  0  0  0
   -4.7297    0.0600   -0.0000 C   0  0  0  0  0  0  0  0  0  0  0  0
   -3.5464    0.7991   -0.0000 C   0  0  0  0  0  0  0  0  0  0  0  0
   -3.3752    2.0844    0.0000 N   0  0  0  0  0  0  0  0  0  0  0  0
   -2.0839    2.2910   -0.0000 C   0  0  0  0  0  0  0  0  0  0  0  0
   -1.4103    1.1623   -0.0000 N   0  0  0  0  0  0  0  0  0  0  0  0
   -2.3039    0.2114   -0.0000 C   0  0  0  0  0  0  0  0  0  0  0  0
   -2.1439   -1.1747   -0.0000 C   0  0  0  0  0  0  0  0  0  0  0  0
   -3.9401   -4.0162   -0.0000 H   0  0  0  0  0  0  0  0  0  0  0  0
   -2.2206   -3.7853    0.0000 H   0  0  0  0  0  0  0  0  0  0  0  0
   -6.7124   -1.6387    0.0000 H   0  0  0  0  0  0  0  0  0  0  0  0
   -5.8132   -3.1230   -0.0000 H   0  0  0  0  0  0  0  0  0  0  0  0
   -5.7001    0.5483   -0.0000 H   0  0  0  0  0  0  0  0  0  0  0  0
   -1.6367    3.2783   -0.0000 H   0  0  0  0  0  0  0  0  0  0  0  0
   -1.1607   -1.6313   -0.0000 H   0  0  0  0  0  0  0  0  0  0  0  0
   -4.3739    3.1529    0.0000 C   0  0  0  0  0  0  0  0  0  0  0  0
   -4.9888    3.0501    0.9001 H   0  0  0  0  0  0  0  0  0  0  0  0
   -4.9888    3.0501   -0.9001 H   0  0  0  0  0  0  0  0  0  0  0  0
   -3.8741    4.1275    0.0000 H   0  0  0  0  0  0  0  0  0  0  0  0
    5.1486    0.1507   -0.0000 N   0  0  0  0  0  0  0  0  0  0  0  0
    3.9199    0.6546    0.0000 C   0  0  2  0  0  0  0  0  0  0  0  0
    2.9825   -0.2913    0.0000 N   0  0  0  0  0  0  0  0  0  0  0  0
    5.0134   -1.1983    0.0000 C   0  0  0  0  0  0  0  0  0  0  0  0
    3.6378   -1.4799    0.0000 C   0  0  0  0  0  0  0  0  0  0  0  0
    3.6502    2.0087   -0.0000 N   0  0  0  0  0  0  0  0  0  0  0  0
    6.1104   -2.2232    0.0000 C   0  0  0  0  0  0  0  0  0  0  0  0
    3.0571   -2.3931    0.0000 H   0  0  0  0  0  0  0  0  0  0  0  0
    2.7013    2.3607    0.0000 H   0  0  0  0  0  0  0  0  0  0  0  0
    4.3946    2.6969   -0.0000 H   0  0  0  0  0  0  0  0  0  0  0  0
    7.1014   -1.7628   -0.0000 H   0  0  0  0  0  0  0  0  0  0  0  0
    6.0315   -2.8550    0.8897 H   0  0  0  0  0  0  0  0  0  0  0  0
    6.0315   -2.8550   -0.8897 H   0  0  0  0  0  0  0  0  0  0  0  0
    6.4605    0.8045   -0.0000 C   0  0  0  0  0  0  0  0  0  0  0  0
    7.0008    0.4983   -0.9017 H   0  0  0  0  0  0  0  0  0  0  0  0
    7.0008    0.4983    0.9017 H   0  0  0  0  0  0  0  0  0  0  0  0
    6.3446    1.8905   -0.0000 H   0  0  0  0  0  0  0  0  0  0  0  0
    0.0632    1.2669   -0.0000 C   0  0  2  0  0  0  0  0  0  0  0  0
    0.3722    2.3191   -0.0000 H   0  0  0  0  0  0  0  0  0  0  0  0
    0.7888    0.4536   -1.0935 C   0  0  0  0  0  0  0  0  0  0  0  0
    1.4582    1.0604   -1.7109 H   0  0  0  0  0  0  0  0  0  0  0  0
    0.1263   -0.1496   -1.7219 H   0  0  0  0  0  0  0  0  0  0  0  0
    1.5050   -0.3661    0.0000 C   0  0  2  0  0  0  0  0  0  0  0  0
    1.1729   -1.4108    0.0000 H   0  0  0  0  0  0  0  0  0  0  0  0
    0.7888    0.4536    1.0935 C   0  0  0  0  0  0  0  0  0  0  0  0
    0.1263   -0.1496    1.7219 H   0  0  0  0  0  0  0  0  0  0  0  0
    1.4582    1.0604    1.7109 H   0  0  0  0  0  0  0  0  0  0  0  0
  1  2  1  0  0  0  0
  1 13  1  0  0  0  0
  2  3  1  0  0  0  0
  3  5  2  0  0  0  0
  3  4  1  0  0  0  0
  4 14  1  0  0  0  0
  5 16  1  0  0  0  0
  6  5  1  0  0  0  0
  6  7  1  0  0  0  0
  7 19  1  0  0  0  0
  8 17  1  0  0  0  0
  8  7  1  0  0  0  0
  9 10  1  0  0  0  0
  9  8  1  0  0  0  0
 10  6  2  0  0  0  0
 11  2  2  0  0  0  0
 11 10  1  0  0  0  0
 12  1  1  0  0  0  0
 15  4  1  0  0  0  0
 18 11  1  0  0  0  0
 19 22  1  0  0  0  0
 19 20  1  0  0  0  0
 21 19  1  0  0  0  0
 23 24  1  0  0  0  0
 23 26  1  0  0  0  0
 24 28  1  6  0  0  0
 24 25  1  0  0  0  0
 25 45  1  0  0  0  0
 25 27  1  0  0  0  0
 26 27  2  0  0  0  0
 27 30  1  0  0  0  0
 28 31  1  0  0  0  0
 29 26  1  0  0  0  0
 29 34  1  0  0  0  0
 32 28  1  0  0  0  0
 33 29  1  0  0  0  0
 35 29  1  0  0  0  0
 36 39  1  0  0  0  0
 36 23  1  0  0  0  0
 36 38  1  0  0  0  0
 37 36  1  0  0  0  0
 40 41  1  6  0  0  0
 40  9  1  0  0  0  0
 40 47  1  0  0  0  0
 42 40  1  0  0  0  0
 42 45  1  0  0  0  0
 43 42  1  0  0  0  0
 44 42  1  0  0  0  0
 45 46  1  1  0  0  0
 45 47  1  0  0  0  0
 47 49  1  0  0  0  0
 47 48  1  0  0  0  0
M  END
>  <energy_and_gap>
-15.652 53.572

$$$$
BEA_40/Syn006217/Syn006217.car
 OpenBabel12061810373D

 49 52  0  0  1  0  0  0  0  0999 V2000
   -3.1438   -3.3783   -0.0000 N   0  0  0  0  0  0  0  0  0  0  0  0
   -3.3124   -1.9736   -0.0000 C   0  0  0  0  0  0  0  0  0  0  0  0
   -4.6087   -1.3576    0.0000 C   0  0  0  0  0  0  0  0  0  0  0  0
   -5.8050   -2.1130    0.0000 N   0  0  0  0  0  0  0  0  0  0  0  0
   -4.7269    0.0573    0.0000 C   0  0  0  0  0  0  0  0  0  0  0  0
   -3.5447    0.7982   -0.0000 C   0  0  0  0  0  0  0  0  0  0  0  0
   -3.3752    2.0837   -0.0000 N   0  0  0  0  0  0  0  0  0  0  0  0
   -2.0841    2.2921   -0.0000 C   0  0  0  0  0  0  0  0  0  0  0  0
   -1.4092    1.1643   -0.0000 N   0  0  0  0  0  0  0  0  0  0  0  0
   -2.3014    0.2122   -0.0000 C   0  0  0  0  0  0  0  0  0  0  0  0
   -2.1391   -1.1737   -0.0000 C   0  0  0  0  0  0  0  0  0  0  0  0
   -2.2121   -3.7844    0.0000 H   0  0  0  0  0  0  0  0  0  0  0  0
   -3.9313   -4.0178   -0.0000 H   0  0  0  0  0  0  0  0  0  0  0  0
   -5.8057   -3.1273    0.0000 H   0  0  0  0  0  0  0  0  0  0  0  0
   -6.7070   -1.6443   -0.0000 H   0  0  0  0  0  0  0  0  0  0  0  0
   -5.6980    0.5442    0.0000 H   0  0  0  0  0  0  0  0  0  0  0  0
   -1.6380    3.2799   -0.0000 H   0  0  0  0  0  0  0  0  0  0  0  0
   -1.1551   -1.6286   -0.0000 H   0  0  0  0  0  0  0  0  0  0  0  0
   -4.3753    3.1509   -0.0000 C   0  0  0  0  0  0  0  0  0  0  0  0
   -4.9901    3.0472   -0.9001 H   0  0  0  0  0  0  0  0  0  0  0  0
   -3.8769    4.1261   -0.0000 H   0  0  0  0  0  0  0  0  0  0  0  0
   -4.9901    3.0472    0.9001 H   0  0  0  0  0  0  0  0  0  0  0  0
    6.5306    0.8038    0.0000 C   0  0  0  0  0  0  0  0  0  0  0  0
    5.1917    0.1278    0.0000 C   0  0  0  0  0  0  0  0  0  0  0  0
    3.9157    0.7345    0.0000 C   0  0  0  0  0  0  0  0  0  0  0  0
    3.6708    2.0917    0.0000 N   0  0  0  0  0  0  0  0  0  0  0  0
    2.9839   -0.2530    0.0000 N   0  0  0  0  0  0  0  0  0  0  0  0
    3.6714   -1.3854    0.0000 C   0  0  0  0  0  0  0  0  0  0  0  0
    4.9795   -1.2070    0.0000 N   0  0  0  0  0  0  0  0  0  0  0  0
    6.6330    1.4307    0.8905 H   0  0  0  0  0  0  0  0  0  0  0  0
    7.3458    0.0756    0.0000 H   0  0  0  0  0  0  0  0  0  0  0  0
    6.6330    1.4307   -0.8905 H   0  0  0  0  0  0  0  0  0  0  0  0
    2.7256    2.4561    0.0000 H   0  0  0  0  0  0  0  0  0  0  0  0
    4.4298    2.7672   -0.0000 H   0  0  0  0  0  0  0  0  0  0  0  0
    3.2211   -2.3708   -0.0000 H   0  0  0  0  0  0  0  0  0  0  0  0
    5.9577   -2.2913   -0.0000 C   0  0  0  0  0  0  0  0  0  0  0  0
    6.5733   -2.1980   -0.9004 H   0  0  0  0  0  0  0  0  0  0  0  0
    6.5733   -2.1980    0.9004 H   0  0  0  0  0  0  0  0  0  0  0  0
    5.4399   -3.2562    0.0000 H   0  0  0  0  0  0  0  0  0  0  0  0
    0.0641    1.2691   -0.0000 C   0  0  1  0  0  0  0  0  0  0  0  0
    0.3736    2.3212   -0.0000 H   0  0  0  0  0  0  0  0  0  0  0  0
    0.7897    0.4563    1.0931 C   0  0  0  0  0  0  0  0  0  0  0  0
    0.1277   -0.1513    1.7178 H   0  0  0  0  0  0  0  0  0  0  0  0
    1.4548    1.0649    1.7137 H   0  0  0  0  0  0  0  0  0  0  0  0
    1.5125   -0.3578    0.0000 C   0  0  1  0  0  0  0  0  0  0  0  0
    1.2035   -1.4099    0.0000 H   0  0  0  0  0  0  0  0  0  0  0  0
    0.7897    0.4563   -1.0931 C   0  0  0  0  0  0  0  0  0  0  0  0
    0.1277   -0.1513   -1.7178 H   0  0  0  0  0  0  0  0  0  0  0  0
    1.4548    1.0649   -1.7137 H   0  0  0  0  0  0  0  0  0  0  0  0
  1  2  1  0  0  0  0
  1 12  1  0  0  0  0
  2  3  1  0  0  0  0
  3  4  1  0  0  0  0
  4 14  1  0  0  0  0
  5  3  2  0  0  0  0
  5 16  1  0  0  0  0
  6  5  1  0  0  0  0
  7  6  1  0  0  0  0
  8  7  1  0  0  0  0
  9 40  1  0  0  0  0
  9 10  1  0  0  0  0
  9  8  1  0  0  0  0
 10  6  2  0  0  0  0
 11 10  1  0  0  0  0
 11  2  2  0  0  0  0
 13  1  1  0  0  0  0
 15  4  1  0  0  0  0
 17  8  1  0  0  0  0
 18 11  1  0  0  0  0
 19  7  1  0  0  0  0
 19 22  1  0  0  0  0
 20 19  1  0  0  0  0
 21 19  1  0  0  0  0
 23 30  1  0  0  0  0
 24 23  1  0  0  0  0
 24 25  2  0  0  0  0
 25 27  1  0  0  0  0
 26 25  1  0  0  0  0
 26 33  1  0  0  0  0
 28 27  1  0  0  0  0
 29 28  1  0  0  0  0
 29 24  1  0  0  0  0
 31 23  1  0  0  0  0
 32 23  1  0  0  0  0
 34 26  1  0  0  0  0
 35 28  1  0  0  0  0
 36 29  1  0  0  0  0
 36 39  1  0  0  0  0
 36 38  1  0  0  0  0
 37 36  1  0  0  0  0
 40 41  1  6  0  0  0
 40 42  1  0  0  0  0
 42 44  1  0  0  0  0
 42 43  1  0  0  0  0
 45 27  1  0  0  0  0
 45 46  1  1  0  0  0
 45 42  1  0  0  0  0
 47 40  1  0  0  0  0
 47 45  1  0  0  0  0
 48 47  1  0  0  0  0
 49 47  1  0  0  0  0
M  END
>  <energy_and_gap>
-15.073 52.125

$$$$
BEA_40/Syn051363/Syn051363.car
 OpenBabel12061810373D

 53 55  0  0  1  0  0  0  0  0999 V2000
   -1.3280    1.3247   -2.6610 N   0  0  0  0  0  0  0  0  0  0  0  0
   -2.0033    0.6105   -1.6892 C   0  0  1  0  0  0  0  0  0  0  0  0
   -1.4537   -0.3362   -0.9415 N   0  0  0  0  0  0  0  0  0  0  0  0
   -2.4114   -0.7827   -0.0843 C   0  0  0  0  0  0  0  0  0  0  0  0
   -2.3750   -1.7501    0.9155 C   0  0  0  0  0  0  0  0  0  0  0  0
   -3.6093   -1.9062    1.5845 C   0  0  0  0  0  0  0  0  0  0  0  0
   -4.7597   -1.2080    1.3230 N   0  0  0  0  0  0  0  0  0  0  0  0
   -4.7684   -0.2596    0.3344 C   0  0  0  0  0  0  0  0  0  0  0  0
   -3.5870   -0.0460   -0.3718 C   0  0  0  0  0  0  0  0  0  0  0  0
   -3.2761    0.8064   -1.3810 N   0  0  0  0  0  0  0  0  0  0  0  0
   -1.8036    2.0158   -3.2320 H   0  0  0  0  0  0  0  0  0  0  0  0
   -0.3328    1.1995   -2.8122 H   0  0  0  0  0  0  0  0  0  0  0  0
   -1.4939   -2.3307    1.1670 H   0  0  0  0  0  0  0  0  0  0  0  0
   -3.6730   -2.6412    2.3819 H   0  0  0  0  0  0  0  0  0  0  0  0
   -5.6880    0.2848    0.1431 H   0  0  0  0  0  0  0  0  0  0  0  0
   -5.9547   -1.4977    2.1160 C   0  0  0  0  0  0  0  0  0  0  0  0
   -5.7322   -1.2876    3.1675 H   0  0  0  0  0  0  0  0  0  0  0  0
   -6.7858   -0.8681    1.7821 H   0  0  0  0  0  0  0  0  0  0  0  0
   -6.2143   -2.5529    1.9797 H   0  0  0  0  0  0  0  0  0  0  0  0
   -4.1785    1.7754   -2.0095 C   0  0  0  0  0  0  0  0  0  0  0  0
   -5.1750    1.7095   -1.5651 H   0  0  0  0  0  0  0  0  0  0  0  0
   -4.2398    1.5474   -3.0787 H   0  0  0  0  0  0  0  0  0  0  0  0
   -3.7715    2.7793   -1.8505 H   0  0  0  0  0  0  0  0  0  0  0  0
    5.1732   -0.6600    0.0676 N   0  0  0  0  0  0  0  0  0  0  0  0
    4.9193   -1.6572   -0.8046 C   0  0  0  0  0  0  0  0  0  0  0  0
    3.5655   -1.9982   -0.6226 C   0  0  0  0  0  0  0  0  0  0  0  0
    3.0557   -1.1952    0.3393 N   0  0  0  0  0  0  0  0  0  0  0  0
    4.0542   -0.4193    0.7235 C   0  0  0  0  0  0  0  0  0  0  0  0
    2.8893   -2.9845   -1.3065 N   0  0  0  0  0  0  0  0  0  0  0  0
    5.7376   -1.9884   -1.4303 H   0  0  0  0  0  0  0  0  0  0  0  0
    3.9710    0.3365    1.4943 H   0  0  0  0  0  0  0  0  0  0  0  0
    3.3476   -3.5320   -2.0298 H   0  0  0  0  0  0  0  0  0  0  0  0
    1.9223   -3.2016   -1.0910 H   0  0  0  0  0  0  0  0  0  0  0  0
    6.4269    0.0517    0.2887 C   0  0  0  0  0  0  0  0  0  0  0  0
    6.7529   -0.1353    1.3170 H   0  0  0  0  0  0  0  0  0  0  0  0
    6.2519    1.1203    0.1260 H   0  0  0  0  0  0  0  0  0  0  0  0
    7.1784   -0.3166   -0.4170 H   0  0  0  0  0  0  0  0  0  0  0  0
    0.6690    3.7514    0.1048 N   0  0  0  0  0  0  0  0  0  0  0  0
    0.1199    3.3357   -0.6415 H   0  0  0  0  0  0  0  0  0  0  0  0
    0.6502    4.7676    0.1271 H   0  0  0  0  0  0  0  0  0  0  0  0
    1.3912    2.9933    1.0208 C   0  0  0  0  0  0  0  0  0  0  0  0
    2.0890    3.7113    1.9708 N   0  0  0  0  0  0  0  0  0  0  0  0
    2.0860    4.7270    2.0141 H   0  0  0  0  0  0  0  0  0  0  0  0
    2.6467    3.2500    2.6842 H   0  0  0  0  0  0  0  0  0  0  0  0
    1.4590    1.6099    1.0435 N   0  0  0  0  0  0  0  0  0  0  0  0
    0.7820    1.0626    0.1615 N   0  0  0  0  0  0  0  0  0  0  0  0
    0.7928   -0.2302    0.0940 C   0  0  0  0  0  0  0  0  0  0  0  0
    1.7125   -1.1078    0.9215 C   0  0  0  0  0  0  0  0  0  0  0  0
    1.3221   -2.1284    0.9900 H   0  0  0  0  0  0  0  0  0  0  0  0
    1.8067   -0.7508    1.9538 H   0  0  0  0  0  0  0  0  0  0  0  0
   -0.0781   -0.8615   -0.9585 C   0  0  0  0  0  0  0  0  0  0  0  0
    0.3465   -0.7042   -1.9550 H   0  0  0  0  0  0  0  0  0  0  0  0
   -0.1457   -1.9458   -0.8230 H   0  0  0  0  0  0  0  0  0  0  0  0
  2  1  1  1  0  0  0
  2 10  1  0  0  0  0
  2  3  1  0  0  0  0
  3  4  1  0  0  0  0
  4  5  2  0  0  0  0
  5 13  1  0  0  0  0
  5  6  1  0  0  0  0
  6 14  1  0  0  0  0
  7  6  1  0  0  0  0
  7 16  1  0  0  0  0
  8  7  1  0  0  0  0
  9  4  1  0  0  0  0
  9  8  2  0  0  0  0
 10  9  1  0  0  0  0
 11  1  1  0  0  0  0
 12  1  1  0  0  0  0
 15  8  1  0  0  0  0
 16 17  1  0  0  0  0
 18 16  1  0  0  0  0
 19 16  1  0  0  0  0
 20 23  1  0  0  0  0
 20 21  1  0  0  0  0
 20 10  1  0  0  0  0
 22 20  1  0  0  0  0
 24 34  1  0  0  0  0
 24 28  1  0  0  0  0
 25 26  2  0  0  0  0
 25 24  1  0  0  0  0
 26 27  1  0  0  0  0
 27 28  1  0  0  0  0
 27 48  1  0  0  0  0
 28 31  1  0  0  0  0
 29 33  1  0  0  0  0
 29 26  1  0  0  0  0
 30 25  1  0  0  0  0
 32 29  1  0  0  0  0
 34 35  1  0  0  0  0
 36 34  1  0  0  0  0
 37 34  1  0  0  0  0
 38 40  1  0  0  0  0
 38 41  2  0  0  0  0
 39 38  1  0  0  0  0
 41 45  1  0  0  0  0
 41 42  1  0  0  0  0
 42 43  1  0  0  0  0
 42 44  1  0  0  0  0
 46 45  1  0  0  0  0
 47 46  2  0  0  0  0
 47 48  1  0  0  0  0
 48 49  1  0  0  0  0
 48 50  1  0  0  0  0
 51  3  1  0  0  0  0
 51 53  1  0  0  0  0
 51 47  1  0  0  0  0
 52 51  1  0  0  0  0
M  RAD  1  45   2
M  END
>  <energy_and_gap>
-15.574 51.202

$$$$
BEA_40/Syn046336/Syn046336.car
 OpenBabel12061810373D

 50 52  0  0  1  0  0  0  0  0999 V2000
   -2.0511    3.2486    0.1618 N   0  0  0  0  0  0  0  0  0  0  0  0
   -2.5641    1.9649    0.1686 C   0  0  2  0  0  0  0  0  0  0  0  0
   -1.9087    0.9007    0.6129 N   0  0  0  0  0  0  0  0  0  0  0  0
   -2.7205   -0.1774    0.4351 C   0  0  0  0  0  0  0  0  0  0  0  0
   -2.5355   -1.5281    0.7142 C   0  0  0  0  0  0  0  0  0  0  0  0
   -3.6481   -2.3270    0.3690 C   0  0  0  0  0  0  0  0  0  0  0  0
   -4.8180   -1.8789   -0.1871 N   0  0  0  0  0  0  0  0  0  0  0  0
   -4.9750   -0.5445   -0.4540 C   0  0  0  0  0  0  0  0  0  0  0  0
   -3.9199    0.3096   -0.1415 C   0  0  0  0  0  0  0  0  0  0  0  0
   -3.7679    1.6504   -0.2846 N   0  0  0  0  0  0  0  0  0  0  0  0
   -2.6007    4.0322   -0.1754 H   0  0  0  0  0  0  0  0  0  0  0  0
   -1.1080    3.4445    0.4798 H   0  0  0  0  0  0  0  0  0  0  0  0
   -1.6334   -1.9400    1.1523 H   0  0  0  0  0  0  0  0  0  0  0  0
   -3.5908   -3.3961    0.5531 H   0  0  0  0  0  0  0  0  0  0  0  0
   -5.9078   -0.2083   -0.8959 H   0  0  0  0  0  0  0  0  0  0  0  0
   -5.8735   -2.8480   -0.4828 C   0  0  0  0  0  0  0  0  0  0  0  0
   -6.7394   -2.3363   -0.9154 H   0  0  0  0  0  0  0  0  0  0  0  0
   -6.1651   -3.3395    0.4515 H   0  0  0  0  0  0  0  0  0  0  0  0
   -5.4824   -3.5794   -1.1979 H   0  0  0  0  0  0  0  0  0  0  0  0
   -4.7518    2.5815   -0.8445 C   0  0  0  0  0  0  0  0  0  0  0  0
   -4.9864    3.3343   -0.0849 H   0  0  0  0  0  0  0  0  0  0  0  0
   -5.6644    2.0477   -1.1224 H   0  0  0  0  0  0  0  0  0  0  0  0
   -4.3164    3.0506   -1.7328 H   0  0  0  0  0  0  0  0  0  0  0  0
    3.6998   -0.3134   -0.6736 N   0  0  0  0  0  0  0  0  0  0  0  0
    4.2191    0.8801   -0.3084 C   0  0  0  0  0  0  0  0  0  0  0  0
    5.5756    0.6423   -0.0184 C   0  0  0  0  0  0  0  0  0  0  0  0
    5.8220   -0.6692   -0.2221 N   0  0  0  0  0  0  0  0  0  0  0  0
    4.6786   -1.1983   -0.6129 C   0  0  0  0  0  0  0  0  0  0  0  0
    6.4904    1.5836    0.3982 N   0  0  0  0  0  0  0  0  0  0  0  0
    3.5508    1.7311   -0.3047 H   0  0  0  0  0  0  0  0  0  0  0  0
    4.5520   -2.2455   -0.8567 H   0  0  0  0  0  0  0  0  0  0  0  0
    7.4538    1.3233    0.5847 H   0  0  0  0  0  0  0  0  0  0  0  0
    6.2262    2.5562    0.5281 H   0  0  0  0  0  0  0  0  0  0  0  0
    7.0711   -1.4080   -0.0614 C   0  0  0  0  0  0  0  0  0  0  0  0
    7.8162   -0.9711   -0.7339 H   0  0  0  0  0  0  0  0  0  0  0  0
    7.3914   -1.3162    0.9813 H   0  0  0  0  0  0  0  0  0  0  0  0
    6.9104   -2.4615   -0.3130 H   0  0  0  0  0  0  0  0  0  0  0  0
    1.4668   -1.5865    1.0999 C   0  0  0  0  0  0  0  0  0  0  0  0
    2.4550   -1.5865    1.5681 H   0  0  0  0  0  0  0  0  0  0  0  0
    1.3155   -2.5570    0.6182 H   0  0  0  0  0  0  0  0  0  0  0  0
    0.7336   -1.5075    1.9034 H   0  0  0  0  0  0  0  0  0  0  0  0
    1.3618   -0.4807    0.0867 C   0  0  0  0  0  0  0  0  0  0  0  0
    2.3164   -0.5695   -1.0756 C   0  0  0  0  0  0  0  0  0  0  0  0
    2.2693   -1.5616   -1.5389 H   0  0  0  0  0  0  0  0  0  0  0  0
    2.0776    0.1589   -1.8592 H   0  0  0  0  0  0  0  0  0  0  0  0
    0.4723    0.5512    0.1442 C   0  0  0  0  0  0  0  0  0  0  0  0
    0.5048    1.2897   -0.6505 H   0  0  0  0  0  0  0  0  0  0  0  0
   -0.5621    0.8181    1.1983 C   0  0  0  0  0  0  0  0  0  0  0  0
   -0.3476    1.7690    1.6946 H   0  0  0  0  0  0  0  0  0  0  0  0
   -0.5871    0.0649    1.9889 H   0  0  0  0  0  0  0  0  0  0  0  0
  1 12  1  0  0  0  0
  2  1  1  6  0  0  0
  2  3  1  0  0  0  0
  3 48  1  0  0  0  0
  4  3  1  0  0  0  0
  4  5  2  0  0  0  0
  5 13  1  0  0  0  0
  6 14  1  0  0  0  0
  6  5  1  0  0  0  0
  7  6  1  0  0  0  0
  8  7  1  0  0  0  0
  8  9  2  0  0  0  0
  9  4  1  0  0  0  0
 10  9  1  0  0  0  0
 10  2  1  0  0  0  0
 11  1  1  0  0  0  0
 15  8  1  0  0  0  0
 16  7  1  0  0  0  0
 16 18  1  0  0  0  0
 17 16  1  0  0  0  0
 19 16  1  0  0  0  0
 20 10  1  0  0  0  0
 20 21  1  0  0  0  0
 22 20  1  0  0  0  0
 23 20  1  0  0  0  0
 24 28  1  0  0  0  0
 24 25  1  0  0  0  0
 25 30  1  0  0  0  0
 25 26  2  0  0  0  0
 26 29  1  0  0  0  0
 27 34  1  0  0  0  0
 27 26  1  0  0  0  0
 28 27  1  0  0  0  0
 29 33  1  0  0  0  0
 29 32  1  0  0  0  0
 31 28  1  0  0  0  0
 34 36  1  0  0  0  0
 35 34  1  0  0  0  0
 37 34  1  0  0  0  0
 38 39  1  0  0  0  0
 38 41  1  0  0  0  0
 40 38  1  0  0  0  0
 42 46  2  0  0  0  0
 42 38  1  0  0  0  0
 43 24  1  0  0  0  0
 43 42  1  0  0  0  0
 44 43  1  0  0  0  0
 45 43  1  0  0  0  0
 46 48  1  0  0  0  0
 47 46  1  0  0  0  0
 48 49  1  0  0  0  0
 48 50  1  0  0  0  0
M  END
>  <energy_and_gap>
-15.164 50.769

$$$$
BEA_40/Syn043546/Syn043546.car
 OpenBabel12061810373D

 55 57  0  0  1  0  0  0  0  0999 V2000
   -5.5589   -1.3905    0.9936 N   0  0  0  0  0  0  0  0  0  0  0  0
   -4.5478   -0.6352    0.3537 C   0  0  0  0  0  0  0  0  0  0  0  0
   -4.7784    0.6683   -0.0950 N   0  0  0  0  0  0  0  0  0  0  0  0
   -3.7713    1.3376   -0.7929 C   0  0  2  0  0  0  0  0  0  0  0  0
   -4.0115    2.6227   -1.3387 N   0  0  0  0  0  0  0  0  0  0  0  0
   -2.4739    0.8181   -1.0351 C   0  0  0  0  0  0  0  0  0  0  0  0
   -2.2690   -0.4587   -0.5417 C   0  0  0  0  0  0  0  0  0  0  0  0
   -3.2783   -1.1892    0.1342 C   0  0  0  0  0  0  0  0  0  0  0  0
   -2.7236   -2.3981    0.4373 N   0  0  0  0  0  0  0  0  0  0  0  0
   -1.4828   -2.3820   -0.0016 C   0  0  0  0  0  0  0  0  0  0  0  0
   -1.1693   -1.2495   -0.5873 N   0  0  0  0  0  0  0  0  0  0  0  0
   -6.5385   -1.1591    0.8675 H   0  0  0  0  0  0  0  0  0  0  0  0
   -5.3366   -2.1960    1.5675 H   0  0  0  0  0  0  0  0  0  0  0  0
   -4.9508    2.9972   -1.4179 H   0  0  0  0  0  0  0  0  0  0  0  0
   -3.2527    3.1712   -1.7355 H   0  0  0  0  0  0  0  0  0  0  0  0
   -1.7054    1.3637   -1.5747 H   0  0  0  0  0  0  0  0  0  0  0  0
   -0.7865   -3.2056    0.1020 H   0  0  0  0  0  0  0  0  0  0  0  0
   -6.0617    1.3357    0.1984 C   0  0  0  0  0  0  0  0  0  0  0  0
   -6.7335    1.1798   -0.6519 H   0  0  0  0  0  0  0  0  0  0  0  0
   -6.5021    0.9394    1.1167 H   0  0  0  0  0  0  0  0  0  0  0  0
   -5.8977    2.4021    0.3764 H   0  0  0  0  0  0  0  0  0  0  0  0
   -3.2165   -3.6041    1.1036 C   0  0  0  0  0  0  0  0  0  0  0  0
   -4.1261   -3.9317    0.5908 H   0  0  0  0  0  0  0  0  0  0  0  0
   -3.4242   -3.3556    2.1491 H   0  0  0  0  0  0  0  0  0  0  0  0
   -2.4683   -4.4030    1.0571 H   0  0  0  0  0  0  0  0  0  0  0  0
    3.3346   -0.9482    0.3397 N   0  0  0  0  0  0  0  0  0  0  0  0
    3.9112   -1.5859   -0.7030 C   0  0  0  0  0  0  0  0  0  0  0  0
    5.2651   -1.2012   -0.6950 C   0  0  0  0  0  0  0  0  0  0  0  0
    5.4533   -0.3588    0.3426 N   0  0  0  0  0  0  0  0  0  0  0  0
    4.2790   -0.2381    0.9307 C   0  0  0  0  0  0  0  0  0  0  0  0
    6.2281   -1.6139   -1.5887 N   0  0  0  0  0  0  0  0  0  0  0  0
    3.2784   -2.2229   -1.3063 H   0  0  0  0  0  0  0  0  0  0  0  0
    4.1046    0.3787    1.8033 H   0  0  0  0  0  0  0  0  0  0  0  0
    7.1853   -1.2852   -1.5078 H   0  0  0  0  0  0  0  0  0  0  0  0
    6.0067   -2.2532   -2.3469 H   0  0  0  0  0  0  0  0  0  0  0  0
    6.6752    0.3127    0.7755 C   0  0  0  0  0  0  0  0  0  0  0  0
    6.4646    0.9278    1.6566 H   0  0  0  0  0  0  0  0  0  0  0  0
    7.0287    0.9436   -0.0462 H   0  0  0  0  0  0  0  0  0  0  0  0
    7.4180   -0.4529    1.0214 H   0  0  0  0  0  0  0  0  0  0  0  0
    2.1032    3.8593    1.4754 N   0  0  0  0  0  0  0  0  0  0  0  0
    2.0457    4.8743    1.4641 H   0  0  0  0  0  0  0  0  0  0  0  0
    2.6805    3.4674    2.2142 H   0  0  0  0  0  0  0  0  0  0  0  0
    1.4509    3.0553    0.5626 C   0  0  0  0  0  0  0  0  0  0  0  0
    0.6953    3.7237   -0.3953 N   0  0  0  0  0  0  0  0  0  0  0  0
    0.6222    4.7371   -0.4275 H   0  0  0  0  0  0  0  0  0  0  0  0
    0.1759    3.2395   -1.1212 H   0  0  0  0  0  0  0  0  0  0  0  0
    1.5927    1.6808    0.6591 N   0  0  0  0  0  0  0  0  0  0  0  0
    0.9425    1.0503   -0.1874 N   0  0  0  0  0  0  0  0  0  0  0  0
    1.0279   -0.2405   -0.1836 C   0  0  0  0  0  0  0  0  0  0  0  0
    1.9309   -1.0237    0.7485 C   0  0  0  0  0  0  0  0  0  0  0  0
    1.8518   -0.6687    1.7828 H   0  0  0  0  0  0  0  0  0  0  0  0
    1.6610   -2.0853    0.7605 H   0  0  0  0  0  0  0  0  0  0  0  0
    0.1527   -0.9753   -1.1586 C   0  0  0  0  0  0  0  0  0  0  0  0
    0.0022   -0.3990   -2.0789 H   0  0  0  0  0  0  0  0  0  0  0  0
    0.6040   -1.9290   -1.4552 H   0  0  0  0  0  0  0  0  0  0  0  0
  1 13  1  0  0  0  0
  2  1  1  0  0  0  0
  3 18  1  0  0  0  0
  3  2  1  0  0  0  0
  4  5  1  6  0  0  0
  4  3  1  0  0  0  0
  6  4  1  0  0  0  0
  6  7  2  0  0  0  0
  7  8  1  0  0  0  0
  8  2  2  0  0  0  0
  8  9  1  0  0  0  0
  9 22  1  0  0  0  0
 10 17  1  0  0  0  0
 10  9  1  0  0  0  0
 11  7  1  0  0  0  0
 11 10  1  0  0  0  0
 12  1  1  0  0  0  0
 14  5  1  0  0  0  0
 15  5  1  0  0  0  0
 16  6  1  0  0  0  0
 18 21  1  0  0  0  0
 18 20  1  0  0  0  0
 19 18  1  0  0  0  0
 22 24  1  0  0  0  0
 23 22  1  0  0  0  0
 25 22  1  0  0  0  0
 26 50  1  0  0  0  0
 26 30  1  0  0  0  0
 27 28  2  0  0  0  0
 27 26  1  0  0  0  0
 28 29  1  0  0  0  0
 29 36  1  0  0  0  0
 29 30  1  0  0  0  0
 30 33  1  0  0  0  0
 31 34  1  0  0  0  0
 31 28  1  0  0  0  0
 32 27  1  0  0  0  0
 35 31  1  0  0  0  0
 36 39  1  0  0  0  0
 36 37  1  0  0  0  0
 38 36  1  0  0  0  0
 40 42  1  0  0  0  0
 41 40  1  0  0  0  0
 43 47  1  0  0  0  0
 43 40  1  0  0  0  0
 44 43  2  0  0  0  0
 45 44  1  0  0  0  0
 46 44  1  0  0  0  0
 48 49  2  0  0  0  0
 48 47  1  0  0  0  0
 49 50  1  0  0  0  0
 50 52  1  0  0  0  0
 50 51  1  0  0  0  0
 53 11  1  0  0  0  0
 53 49  1  0  0  0  0
 54 53  1  0  0  0  0
 55 53  1  0  0  0  0
M  RAD  1  47   2
M  END
>  <energy_and_gap>
-15.045 50.319

$$$$
BEA_40/Syn082688/Syn082688.car
 OpenBabel12061810373D

 54 56  0  0  0  0  0  0  0  0999 V2000
   -5.1347    0.5395   -1.7053 N   0  0  0  0  0  0  0  0  0  0  0  0
   -5.0972   -0.3174   -0.5761 C   0  0  0  0  0  0  0  0  0  0  0  0
   -6.2155   -1.0739   -0.3019 N   0  0  0  0  0  0  0  0  0  0  0  0
   -6.1504   -1.9135    0.7720 C   0  0  0  0  0  0  0  0  0  0  0  0
   -5.0293   -2.0524    1.6002 C   0  0  0  0  0  0  0  0  0  0  0  0
   -3.8961   -1.2777    1.3190 C   0  0  0  0  0  0  0  0  0  0  0  0
   -3.9042   -0.3804    0.2263 C   0  0  0  0  0  0  0  0  0  0  0  0
   -2.7038    0.4131   -0.0259 C   0  0  0  0  0  0  0  0  0  0  0  0
   -1.4006    0.0632   -0.4476 C   0  0  0  0  0  0  0  0  0  0  0  0
   -0.6758    1.1995   -0.5057 N   0  0  0  0  0  0  0  0  0  0  0  0
   -1.4728    2.1796   -0.1395 C   0  0  0  0  0  0  0  0  0  0  0  0
   -2.6857    1.7601    0.1654 N   0  0  0  0  0  0  0  0  0  0  0  0
   -5.9731    0.6068   -2.2716 H   0  0  0  0  0  0  0  0  0  0  0  0
   -4.3351    1.0989   -1.9854 H   0  0  0  0  0  0  0  0  0  0  0  0
   -7.0291   -2.5128    0.9914 H   0  0  0  0  0  0  0  0  0  0  0  0
   -5.0392   -2.7407    2.4388 H   0  0  0  0  0  0  0  0  0  0  0  0
   -3.0230   -1.3735    1.9577 H   0  0  0  0  0  0  0  0  0  0  0  0
   -0.8920   -0.8527   -0.7180 H   0  0  0  0  0  0  0  0  0  0  0  0
   -1.1566    3.2145   -0.0900 H   0  0  0  0  0  0  0  0  0  0  0  0
   -7.4784   -1.0757   -1.0527 C   0  0  0  0  0  0  0  0  0  0  0  0
   -8.2054   -1.7608   -0.6045 H   0  0  0  0  0  0  0  0  0  0  0  0
   -7.2672   -1.3943   -2.0786 H   0  0  0  0  0  0  0  0  0  0  0  0
   -7.8871   -0.0602   -1.0395 H   0  0  0  0  0  0  0  0  0  0  0  0
   -3.6966    2.7153    0.6200 C   0  0  0  0  0  0  0  0  0  0  0  0
   -4.4313    2.1918    1.2389 H   0  0  0  0  0  0  0  0  0  0  0  0
   -4.1796    3.1484   -0.2618 H   0  0  0  0  0  0  0  0  0  0  0  0
   -3.2156    3.4978    1.2169 H   0  0  0  0  0  0  0  0  0  0  0  0
    4.7259   -0.8477    0.3466 N   0  0  0  0  0  0  0  0  0  0  0  0
    5.4508   -1.6245   -0.4882 C   0  0  0  0  0  0  0  0  0  0  0  0
    6.7125   -1.0096   -0.5947 C   0  0  0  0  0  0  0  0  0  0  0  0
    6.7011    0.1017    0.1717 N   0  0  0  0  0  0  0  0  0  0  0  0
    5.4995    0.1583    0.7131 C   0  0  0  0  0  0  0  0  0  0  0  0
    7.7717   -1.4625   -1.3492 N   0  0  0  0  0  0  0  0  0  0  0  0
    4.9674   -2.5049   -0.8907 H   0  0  0  0  0  0  0  0  0  0  0  0
    5.1778    0.9442    1.3847 H   0  0  0  0  0  0  0  0  0  0  0  0
    8.6500   -0.9537   -1.3680 H   0  0  0  0  0  0  0  0  0  0  0  0
    7.7017   -2.3123   -1.9020 H   0  0  0  0  0  0  0  0  0  0  0  0
    7.7632    1.0782    0.3956 C   0  0  0  0  0  0  0  0  0  0  0  0
    7.4087    1.8573    1.0785 H   0  0  0  0  0  0  0  0  0  0  0  0
    8.0319    1.5192   -0.5696 H   0  0  0  0  0  0  0  0  0  0  0  0
    8.6204    0.5571    0.8338 H   0  0  0  0  0  0  0  0  0  0  0  0
    1.7468    1.5480    1.4178 C   0  0  0  0  0  0  0  0  0  0  0  0
    2.5564    1.2150    2.0695 H   0  0  0  0  0  0  0  0  0  0  0  0
    0.8130    1.4664    1.9813 H   0  0  0  0  0  0  0  0  0  0  0  0
    1.9285    2.6056    1.2050 H   0  0  0  0  0  0  0  0  0  0  0  0
    1.6612    0.7655    0.1371 C   0  0  0  0  0  0  0  0  0  0  0  0
    0.7261    1.3165   -0.9073 C   0  0  0  0  0  0  0  0  0  0  0  0
    0.8240    0.7907   -1.8640 H   0  0  0  0  0  0  0  0  0  0  0  0
    0.9427    2.3734   -1.1010 H   0  0  0  0  0  0  0  0  0  0  0  0
    2.3843   -0.3577   -0.1334 C   0  0  0  0  0  0  0  0  0  0  0  0
    2.2515   -0.8308   -1.1011 H   0  0  0  0  0  0  0  0  0  0  0  0
    3.3454   -1.0612    0.7761 C   0  0  0  0  0  0  0  0  0  0  0  0
    3.2654   -0.7448    1.8201 H   0  0  0  0  0  0  0  0  0  0  0  0
    3.1523   -2.1391    0.7577 H   0  0  0  0  0  0  0  0  0  0  0  0
  1  2  1  0  0  0  0
  2  3  1  0  0  0  0
  2  7  2  0  0  0  0
  3  4  1  0  0  0  0
  4 15  1  0  0  0  0
  4  5  2  0  0  0  0
  5 16  1  0  0  0  0
  6  5  1  0  0  0  0
  6 17  1  0  0  0  0
  7  6  1  0  0  0  0
  8 12  1  0  0  0  0
  8  7  1  0  0  0  0
  9  8  2  0  0  0  0
 10  9  1  0  0  0  0
 10 11  1  0  0  0  0
 11 19  1  0  0  0  0
 11 12  1  0  0  0  0
 12 24  1  0  0  0  0
 13  1  1  0  0  0  0
 14  1  1  0  0  0  0
 18  9  1  0  0  0  0
 20 23  1  0  0  0  0
 20 21  1  0  0  0  0
 20  3  1  0  0  0  0
 22 20  1  0  0  0  0
 24 27  1  0  0  0  0
 24 25  1  0  0  0  0
 26 24  1  0  0  0  0
 28 32  1  0  0  0  0
 28 52  1  0  0  0  0
 29 28  1  0  0  0  0
 30 29  2  0  0  0  0
 30 31  1  0  0  0  0
 31 38  1  0  0  0  0
 31 32  1  0  0  0  0
 32 35  1  0  0  0  0
 33 30  1  0  0  0  0
 34 29  1  0  0  0  0
 36 33  1  0  0  0  0
 37 33  1  0  0  0  0
 38 41  1  0  0  0  0
 38 39  1  0  0  0  0
 40 38  1  0  0  0  0
 42 44  1  0  0  0  0
 42 43  1  0  0  0  0
 45 42  1  0  0  0  0
 46 42  1  0  0  0  0
 47 10  1  0  0  0  0
 47 46  1  0  0  0  0
 48 47  1  0  0  0  0
 49 47  1  0  0  0  0
 50 46  2  0  0  0  0
 50 52  1  0  0  0  0
 51 50  1  0  0  0  0
 52 53  1  0  0  0  0
 54 52  1  0  0  0  0
M  END
>  <energy_and_gap>
-15.032 47.081

$$$$
BEA_40/Syn039979/Syn039979.car
 OpenBabel12061810373D

 49 52  0  0  1  0  0  0  0  0999 V2000
   -2.4667    3.6554   -0.2460 N   0  0  0  0  0  0  0  0  0  0  0  0
   -2.8201    2.2928   -0.1544 C   0  0  0  0  0  0  0  0  0  0  0  0
   -4.1850    1.9262   -0.1049 C   0  0  0  0  0  0  0  0  0  0  0  0
   -4.5710    0.5654   -0.0125 C   0  0  0  0  0  0  0  0  0  0  0  0
   -5.9421    0.2369    0.0348 N   0  0  0  0  0  0  0  0  0  0  0  0
   -3.5400   -0.3910    0.0270 C   0  0  0  0  0  0  0  0  0  0  0  0
   -3.5769   -1.6916    0.1089 N   0  0  0  0  0  0  0  0  0  0  0  0
   -2.3324   -2.1017    0.1101 C   0  0  0  0  0  0  0  0  0  0  0  0
   -1.4858   -1.1039    0.0313 N   0  0  0  0  0  0  0  0  0  0  0  0
   -2.2092   -0.0220   -0.0220 C   0  0  0  0  0  0  0  0  0  0  0  0
   -1.8027    1.3115   -0.1132 C   0  0  0  0  0  0  0  0  0  0  0  0
   -1.4910    3.9387   -0.2812 H   0  0  0  0  0  0  0  0  0  0  0  0
   -3.1832    4.3761   -0.2772 H   0  0  0  0  0  0  0  0  0  0  0  0
   -4.9488    2.6988   -0.1381 H   0  0  0  0  0  0  0  0  0  0  0  0
   -6.6467    0.9687    0.0029 H   0  0  0  0  0  0  0  0  0  0  0  0
   -6.2567   -0.7234    0.1009 H   0  0  0  0  0  0  0  0  0  0  0  0
   -2.0402   -3.1441    0.1694 H   0  0  0  0  0  0  0  0  0  0  0  0
   -4.6354   -2.7009    0.1925 C   0  0  0  0  0  0  0  0  0  0  0  0
   -5.2579   -2.6197   -0.7042 H   0  0  0  0  0  0  0  0  0  0  0  0
   -4.2088   -3.7086    0.2471 H   0  0  0  0  0  0  0  0  0  0  0  0
   -5.2227   -2.5074    1.0958 H   0  0  0  0  0  0  0  0  0  0  0  0
   -0.7557    1.5907   -0.1509 H   0  0  0  0  0  0  0  0  0  0  0  0
    5.2837   -0.3499   -0.1282 N   0  0  0  0  0  0  0  0  0  0  0  0
    4.1458    0.3321   -0.1639 C   0  0  1  0  0  0  0  0  0  0  0  0
    3.0923   -0.4815   -0.1047 N   0  0  0  0  0  0  0  0  0  0  0  0
    4.9747   -1.6593   -0.0500 C   0  0  0  0  0  0  0  0  0  0  0  0
    3.5774   -1.7461   -0.0335 C   0  0  0  0  0  0  0  0  0  0  0  0
    3.8213    2.4298    1.0505 N   0  0  0  0  0  0  0  0  0  0  0  0
    4.0784    1.8202   -0.2507 C   0  0  0  0  0  0  0  0  0  0  0  0
    5.7906   -2.3685   -0.0139 H   0  0  0  0  0  0  0  0  0  0  0  0
    2.8654   -2.5579    0.0223 H   0  0  0  0  0  0  0  0  0  0  0  0
    3.7372    3.4407    0.9444 H   0  0  0  0  0  0  0  0  0  0  0  0
    4.6156    2.2824    1.6742 H   0  0  0  0  0  0  0  0  0  0  0  0
    5.0096    2.2205   -0.6636 H   0  0  0  0  0  0  0  0  0  0  0  0
    3.2914    2.1076   -0.9540 H   0  0  0  0  0  0  0  0  0  0  0  0
    6.6610    0.1415   -0.1633 C   0  0  0  0  0  0  0  0  0  0  0  0
    7.3563   -0.6861    0.0115 H   0  0  0  0  0  0  0  0  0  0  0  0
    6.8426    0.5803   -1.1496 H   0  0  0  0  0  0  0  0  0  0  0  0
    6.7808    0.8939    0.6228 H   0  0  0  0  0  0  0  0  0  0  0  0
    1.6631   -0.1072   -0.1032 C   0  0  1  0  0  0  0  0  0  0  0  0
    1.5559    0.9788   -0.1736 H   0  0  0  0  0  0  0  0  0  0  0  0
    0.7762   -0.8431   -1.1312 C   0  0  0  0  0  0  0  0  0  0  0  0
    0.2132   -0.1640   -1.7788 H   0  0  0  0  0  0  0  0  0  0  0  0
    1.3009   -1.5965   -1.7271 H   0  0  0  0  0  0  0  0  0  0  0  0
   -0.0491   -1.4481    0.0242 C   0  0  1  0  0  0  0  0  0  0  0  0
    0.0900   -2.5341    0.0951 H   0  0  0  0  0  0  0  0  0  0  0  0
    0.8228   -0.6955    1.0513 C   0  0  0  0  0  0  0  0  0  0  0  0
    1.3746   -1.3636    1.7200 H   0  0  0  0  0  0  0  0  0  0  0  0
    0.2865    0.0661    1.6258 H   0  0  0  0  0  0  0  0  0  0  0  0
  1  2  1  0  0  0  0
  2 11  2  0  0  0  0
  2  3  1  0  0  0  0
  3  4  2  0  0  0  0
  4  6  1  0  0  0  0
  4  5  1  0  0  0  0
  5 16  1  0  0  0  0
  6  7  1  0  0  0  0
  7  8  1  0  0  0  0
  7 18  1  0  0  0  0
  8 17  1  0  0  0  0
  9  8  1  0  0  0  0
 10  6  2  0  0  0  0
 10  9  1  0  0  0  0
 11 10  1  0  0  0  0
 12  1  1  0  0  0  0
 13  1  1  0  0  0  0
 14  3  1  0  0  0  0
 15  5  1  0  0  0  0
 18 20  1  0  0  0  0
 18 21  1  0  0  0  0
 19 18  1  0  0  0  0
 22 11  1  0  0  0  0
 23 26  1  0  0  0  0
 24 29  1  1  0  0  0
 24 23  1  0  0  0  0
 24 25  1  0  0  0  0
 25 40  1  0  0  0  0
 25 27  1  0  0  0  0
 26 27  2  0  0  0  0
 26 30  1  0  0  0  0
 27 31  1  0  0  0  0
 28 33  1  0  0  0  0
 29 28  1  0  0  0  0
 32 28  1  0  0  0  0
 34 29  1  0  0  0  0
 35 29  1  0  0  0  0
 36 23  1  0  0  0  0
 36 37  1  0  0  0  0
 36 39  1  0  0  0  0
 38 36  1  0  0  0  0
 40 41  1  6  0  0  0
 40 47  1  0  0  0  0
 42 40  1  0  0  0  0
 42 45  1  0  0  0  0
 43 42  1  0  0  0  0
 44 42  1  0  0  0  0
 45  9  1  0  0  0  0
 45 46  1  1  0  0  0
 45 47  1  0  0  0  0
 47 49  1  0  0  0  0
 47 48  1  0  0  0  0
M  END
>  <energy_and_gap>
-15.778 46.311

$$$$
BEA_40/Syn047516/Syn047516.car
 OpenBabel12061810373D

 50 54  0  0  1  0  0  0  0  0999 V2000
   -0.2259    2.8837   -0.0568 N   0  0  0  0  0  0  0  0  0  0  0  0
   -0.9978    1.7350   -0.0140 C   0  0  2  0  0  0  0  0  0  0  0  0
   -0.4988    0.5043   -0.0031 N   0  0  0  0  0  0  0  0  0  0  0  0
   -1.5666   -0.3528    0.0319 C   0  0  0  0  0  0  0  0  0  0  0  0
   -1.6058   -1.7473    0.0785 C   0  0  0  0  0  0  0  0  0  0  0  0
   -2.8785   -2.3433    0.0891 C   0  0  0  0  0  0  0  0  0  0  0  0
   -4.0701   -1.5786    0.0391 C   0  0  0  0  0  0  0  0  0  0  0  0
   -5.3174   -2.2512    0.0350 C   0  0  0  0  0  0  0  0  0  0  0  0
   -6.5194   -1.5273   -0.0303 C   0  0  0  0  0  0  0  0  0  0  0  0
   -6.4950   -0.1257   -0.0978 C   0  0  0  0  0  0  0  0  0  0  0  0
   -5.2712    0.5672   -0.0926 C   0  0  0  0  0  0  0  0  0  0  0  0
   -4.0407   -0.1415   -0.0132 C   0  0  0  0  0  0  0  0  0  0  0  0
   -2.7550    0.4447    0.0057 C   0  0  0  0  0  0  0  0  0  0  0  0
   -2.3240    1.7441    0.0155 N   0  0  0  0  0  0  0  0  0  0  0  0
    0.7688    2.8670    0.1232 H   0  0  0  0  0  0  0  0  0  0  0  0
   -0.6231    3.7865   -0.2905 H   0  0  0  0  0  0  0  0  0  0  0  0
   -0.7211   -2.3721    0.1108 H   0  0  0  0  0  0  0  0  0  0  0  0
   -2.9301   -3.4277    0.1282 H   0  0  0  0  0  0  0  0  0  0  0  0
   -7.4684   -2.0528   -0.0348 H   0  0  0  0  0  0  0  0  0  0  0  0
   -7.4271    0.4262   -0.1573 H   0  0  0  0  0  0  0  0  0  0  0  0
   -5.3176    1.6447   -0.1625 H   0  0  0  0  0  0  0  0  0  0  0  0
   -3.1686    2.9442    0.0846 C   0  0  0  0  0  0  0  0  0  0  0  0
   -3.8786    2.8226    0.9078 H   0  0  0  0  0  0  0  0  0  0  0  0
   -3.6785    3.0636   -0.8766 H   0  0  0  0  0  0  0  0  0  0  0  0
   -2.5765    3.8359    0.2980 H   0  0  0  0  0  0  0  0  0  0  0  0
   -5.3655   -3.3354    0.0782 H   0  0  0  0  0  0  0  0  0  0  0  0
    4.6904   -0.8200   -0.0291 C   0  0  1  0  0  0  0  0  0  0  0  0
    6.0135   -0.7893   -0.0170 N   0  0  0  0  0  0  0  0  0  0  0  0
    6.3817    0.5057    0.0453 C   0  0  0  0  0  0  0  0  0  0  0  0
    5.2025    1.2650    0.0705 C   0  0  0  0  0  0  0  0  0  0  0  0
    4.1577    0.3976    0.0225 N   0  0  0  0  0  0  0  0  0  0  0  0
    3.9697   -1.9947   -0.0892 N   0  0  0  0  0  0  0  0  0  0  0  0
    7.4402    0.7270    0.0639 H   0  0  0  0  0  0  0  0  0  0  0  0
    4.9960    2.3258    0.1172 H   0  0  0  0  0  0  0  0  0  0  0  0
    4.4415   -2.8924   -0.1262 H   0  0  0  0  0  0  0  0  0  0  0  0
    2.9577   -1.9996   -0.0986 H   0  0  0  0  0  0  0  0  0  0  0  0
    6.9727   -1.8932   -0.0599 C   0  0  0  0  0  0  0  0  0  0  0  0
    7.9944   -1.5008   -0.0334 H   0  0  0  0  0  0  0  0  0  0  0  0
    6.8128   -2.4510   -0.9882 H   0  0  0  0  0  0  0  0  0  0  0  0
    6.7979   -2.5337    0.8105 H   0  0  0  0  0  0  0  0  0  0  0  0
    0.8892   -0.0291   -0.0309 C   0  0  2  0  0  0  0  0  0  0  0  0
    0.8786   -1.1182   -0.0975 H   0  0  0  0  0  0  0  0  0  0  0  0
    1.8323    0.4390    1.0973 C   0  0  0  0  0  0  0  0  0  0  0  0
    1.4062    1.2104    1.7461 H   0  0  0  0  0  0  0  0  0  0  0  0
    2.2371   -0.3847    1.6935 H   0  0  0  0  0  0  0  0  0  0  0  0
    2.8073    1.0005    0.0391 C   0  0  2  0  0  0  0  0  0  0  0  0
    2.8788    2.0927    0.0946 H   0  0  0  0  0  0  0  0  0  0  0  0
    1.8547    0.5476   -1.0891 C   0  0  0  0  0  0  0  0  0  0  0  0
    1.4460    1.3767   -1.6737 H   0  0  0  0  0  0  0  0  0  0  0  0
    2.2748   -0.2156   -1.7516 H   0  0  0  0  0  0  0  0  0  0  0  0
  1 15  1  0  0  0  0
  2  1  1  6  0  0  0
  2  3  1  0  0  0  0
  2 14  1  0  0  0  0
  3  4  1  0  0  0  0
  4  5  2  0  0  0  0
  5  6  1  0  0  0  0
  5 17  1  0  0  0  0
  6 18  1  0  0  0  0
  7  6  1  0  0  0  0
  8  7  2  0  0  0  0
  8 26  1  0  0  0  0
  9  8  1  0  0  0  0
 10 11  1  0  0  0  0
 10  9  2  0  0  0  0
 11 12  1  0  0  0  0
 12 13  2  0  0  0  0
 12  7  1  0  0  0  0
 13 14  1  0  0  0  0
 13  4  1  0  0  0  0
 14 22  1  0  0  0  0
 16  1  1  0  0  0  0
 19  9  1  0  0  0  0
 20 10  1  0  0  0  0
 21 11  1  0  0  0  0
 22 25  1  0  0  0  0
 22 23  1  0  0  0  0
 24 22  1  0  0  0  0
 27 32  1  6  0  0  0
 27 28  1  0  0  0  0
 27 31  1  0  0  0  0
 28 29  1  0  0  0  0
 29 33  1  0  0  0  0
 29 30  2  0  0  0  0
 30 34  1  0  0  0  0
 31 46  1  0  0  0  0
 31 30  1  0  0  0  0
 35 32  1  0  0  0  0
 36 32  1  0  0  0  0
 37 38  1  0  0  0  0
 37 28  1  0  0  0  0
 37 40  1  0  0  0  0
 39 37  1  0  0  0  0
 41 42  1  6  0  0  0
 41  3  1  0  0  0  0
 41 43  1  0  0  0  0
 43 45  1  0  0  0  0
 43 44  1  0  0  0  0
 46 47  1  1  0  0  0
 46 43  1  0  0  0  0
 48 41  1  0  0  0  0
 48 46  1  0  0  0  0
 49 48  1  0  0  0  0
 50 48  1  0  0  0  0
M  END
>  <energy_and_gap>
-15.207 44.222

$$$$
BEA_40/Syn030827/Syn030827.car
 OpenBabel12061810373D

 47 50  0  0  1  0  0  0  0  0999 V2000
   -2.5540   -0.0805    0.0715 C   0  0  0  0  0  0  0  0  0  0  0  0
   -2.8618   -1.4491   -0.0391 C   0  0  0  0  0  0  0  0  0  0  0  0
   -2.9710    2.1128    0.1001 N   0  0  0  0  0  0  0  0  0  0  0  0
   -1.3793    0.6086    0.2522 N   0  0  0  0  0  0  0  0  0  0  0  0
   -1.6872    1.8917    0.2337 C   0  0  0  0  0  0  0  0  0  0  0  0
   -3.5796    0.9116    0.0118 C   0  0  0  0  0  0  0  0  0  0  0  0
   -4.2581   -1.7789   -0.1581 C   0  0  0  0  0  0  0  0  0  0  0  0
   -4.9291    0.6167   -0.1194 C   0  0  0  0  0  0  0  0  0  0  0  0
   -5.2452   -0.7533   -0.1912 C   0  0  0  0  0  0  0  0  0  0  0  0
   -1.8731   -2.4591   -0.0696 N   0  0  0  0  0  0  0  0  0  0  0  0
   -4.7195   -3.2087   -0.2696 C   0  0  0  0  0  0  0  0  0  0  0  0
   -0.9757    2.7020    0.3183 H   0  0  0  0  0  0  0  0  0  0  0  0
   -5.6977    1.3816   -0.1588 H   0  0  0  0  0  0  0  0  0  0  0  0
   -6.2925   -1.0227   -0.2874 H   0  0  0  0  0  0  0  0  0  0  0  0
   -2.1128   -3.4327    0.0921 H   0  0  0  0  0  0  0  0  0  0  0  0
   -0.9219   -2.2547   -0.3523 H   0  0  0  0  0  0  0  0  0  0  0  0
   -4.4438   -3.7692    0.6290 H   0  0  0  0  0  0  0  0  0  0  0  0
   -4.2737   -3.6869   -1.1473 H   0  0  0  0  0  0  0  0  0  0  0  0
   -5.8066   -3.2758   -0.3773 H   0  0  0  0  0  0  0  0  0  0  0  0
   -3.5869    3.4375    0.0652 C   0  0  0  0  0  0  0  0  0  0  0  0
   -4.2771    3.5177    0.9112 H   0  0  0  0  0  0  0  0  0  0  0  0
   -2.8117    4.2072    0.1412 H   0  0  0  0  0  0  0  0  0  0  0  0
   -4.1243    3.5422   -0.8828 H   0  0  0  0  0  0  0  0  0  0  0  0
    3.2171    0.3219   -0.1012 N   0  0  0  0  0  0  0  0  0  0  0  0
    3.6107   -0.8574    0.4369 C   0  0  0  0  0  0  0  0  0  0  0  0
    5.0078   -0.9148    0.2818 C   0  0  0  0  0  0  0  0  0  0  0  0
    5.4045    0.2166   -0.3364 N   0  0  0  0  0  0  0  0  0  0  0  0
    4.3090    0.9213   -0.5448 C   0  0  0  0  0  0  0  0  0  0  0  0
    5.8251   -1.9453    0.6898 N   0  0  0  0  0  0  0  0  0  0  0  0
    2.8422   -1.4930    0.8562 H   0  0  0  0  0  0  0  0  0  0  0  0
    4.3102    1.8898   -1.0295 H   0  0  0  0  0  0  0  0  0  0  0  0
    6.8279   -1.9035    0.5369 H   0  0  0  0  0  0  0  0  0  0  0  0
    5.4476   -2.7682    1.1514 H   0  0  0  0  0  0  0  0  0  0  0  0
    6.7505    0.6315   -0.7211 C   0  0  0  0  0  0  0  0  0  0  0  0
    7.3637    0.6869    0.1840 H   0  0  0  0  0  0  0  0  0  0  0  0
    7.1532   -0.1131   -1.4151 H   0  0  0  0  0  0  0  0  0  0  0  0
    6.7086    1.6123   -1.2062 H   0  0  0  0  0  0  0  0  0  0  0  0
   -0.0082    0.0934    0.4466 C   0  0  2  0  0  0  0  0  0  0  0  0
   -0.0555   -0.8519    0.9946 H   0  0  0  0  0  0  0  0  0  0  0  0
    1.0738    1.0076    1.0753 C   0  0  0  0  0  0  0  0  0  0  0  0
    1.5733    0.5436    1.9319 H   0  0  0  0  0  0  0  0  0  0  0  0
    0.7591    2.0220    1.3311 H   0  0  0  0  0  0  0  0  0  0  0  0
    1.8870    0.9343   -0.2329 C   0  0  2  0  0  0  0  0  0  0  0  0
    1.9628    1.9040   -0.7394 H   0  0  0  0  0  0  0  0  0  0  0  0
    0.8123    0.0217   -0.8583 C   0  0  0  0  0  0  0  0  0  0  0  0
    0.3152    0.4797   -1.7199 H   0  0  0  0  0  0  0  0  0  0  0  0
    1.1567   -0.9893   -1.0984 H   0  0  0  0  0  0  0  0  0  0  0  0
  1  4  1  0  0  0  0
  2  1  2  0  0  0  0
  3  5  1  0  0  0  0
  4 38  1  0  0  0  0
  5  4  1  0  0  0  0
  5 12  1  0  0  0  0
  6  1  1  0  0  0  0
  6  3  1  0  0  0  0
  7  2  1  0  0  0  0
  8  6  2  0  0  0  0
  9  7  2  0  0  0  0
  9  8  1  0  0  0  0
 10  2  1  0  0  0  0
 10 15  1  0  0  0  0
 11  7  1  0  0  0  0
 11 17  1  0  0  0  0
 13  8  1  0  0  0  0
 14  9  1  0  0  0  0
 16 10  1  0  0  0  0
 18 11  1  0  0  0  0
 19 11  1  0  0  0  0
 20  3  1  0  0  0  0
 20 22  1  0  0  0  0
 20 21  1  0  0  0  0
 23 20  1  0  0  0  0
 24 25  1  0  0  0  0
 25 30  1  0  0  0  0
 26 25  2  0  0  0  0
 26 29  1  0  0  0  0
 27 26  1  0  0  0  0
 28 27  1  0  0  0  0
 28 24  1  0  0  0  0
 29 33  1  0  0  0  0
 31 28  1  0  0  0  0
 32 29  1  0  0  0  0
 34 27  1  0  0  0  0
 34 35  1  0  0  0  0
 36 34  1  0  0  0  0
 37 34  1  0  0  0  0
 38 39  1  1  0  0  0
 38 40  1  0  0  0  0
 40 42  1  0  0  0  0
 40 41  1  0  0  0  0
 43 44  1  6  0  0  0
 43 24  1  0  0  0  0
 43 40  1  0  0  0  0
 45 43  1  0  0  0  0
 45 38  1  0  0  0  0
 46 45  1  0  0  0  0
 47 45  1  0  0  0  0
M  END
>  <energy_and_gap>
-15.248 43.228

$$$$
BEA_40/Syn052016/Syn052016.car
 OpenBabel12061810373D

 51 53  0  0  0  0  0  0  0  0999 V2000
    3.1759    2.2824   -0.6628 N   0  0  0  0  0  0  0  0  0  0  0  0
    4.2045    1.5175   -0.0620 C   0  0  0  0  0  0  0  0  0  0  0  0
    4.0231    0.1440    0.3115 C   0  0  0  0  0  0  0  0  0  0  0  0
    5.1181   -0.5505    0.8887 C   0  0  0  0  0  0  0  0  0  0  0  0
    6.3548    0.0871    1.0906 C   0  0  0  0  0  0  0  0  0  0  0  0
    6.5229    1.4321    0.7253 C   0  0  0  0  0  0  0  0  0  0  0  0
    5.4562    2.1456    0.1533 C   0  0  0  0  0  0  0  0  0  0  0  0
    1.3725   -2.0387   -0.5890 C   0  0  0  0  0  0  0  0  0  0  0  0
    2.6251   -1.6352   -0.6677 N   0  0  0  0  0  0  0  0  0  0  0  0
    2.7512   -0.5572    0.1536 C   0  0  0  0  0  0  0  0  0  0  0  0
    1.4717   -0.3488    0.7185 C   0  0  0  0  0  0  0  0  0  0  0  0
    0.6505   -1.2957    0.2219 N   0  0  0  0  0  0  0  0  0  0  0  0
    3.3225    3.2682   -0.8642 H   0  0  0  0  0  0  0  0  0  0  0  0
    2.2944    1.8692   -0.9499 H   0  0  0  0  0  0  0  0  0  0  0  0
    5.0155   -1.5882    1.1917 H   0  0  0  0  0  0  0  0  0  0  0  0
    7.1803   -0.4600    1.5334 H   0  0  0  0  0  0  0  0  0  0  0  0
    7.4781    1.9210    0.8841 H   0  0  0  0  0  0  0  0  0  0  0  0
    5.6128    3.1835   -0.1246 H   0  0  0  0  0  0  0  0  0  0  0  0
    0.9703   -2.8850   -1.1325 H   0  0  0  0  0  0  0  0  0  0  0  0
    1.0385    0.3578    1.4137 H   0  0  0  0  0  0  0  0  0  0  0  0
    3.5829   -2.3223   -1.5342 C   0  0  0  0  0  0  0  0  0  0  0  0
    3.0479   -2.8642   -2.3215 H   0  0  0  0  0  0  0  0  0  0  0  0
    4.1605   -3.0191   -0.9186 H   0  0  0  0  0  0  0  0  0  0  0  0
    4.2409   -1.5769   -1.9916 H   0  0  0  0  0  0  0  0  0  0  0  0
   -5.6395   -0.0891    1.0441 N   0  0  0  0  0  0  0  0  0  0  0  0
   -6.0663    0.5987   -0.0355 C   0  0  0  0  0  0  0  0  0  0  0  0
   -4.9257    1.2243   -0.5735 C   0  0  0  0  0  0  0  0  0  0  0  0
   -3.8636    0.8909    0.1938 N   0  0  0  0  0  0  0  0  0  0  0  0
   -4.3390    0.1091    1.1463 C   0  0  0  0  0  0  0  0  0  0  0  0
   -4.9006    2.0313   -1.6894 N   0  0  0  0  0  0  0  0  0  0  0  0
   -7.1212    0.5476   -0.2708 H   0  0  0  0  0  0  0  0  0  0  0  0
   -3.7297   -0.3277    1.9276 H   0  0  0  0  0  0  0  0  0  0  0  0
   -5.7475    2.2318   -2.2143 H   0  0  0  0  0  0  0  0  0  0  0  0
   -4.0327    2.4465   -2.0126 H   0  0  0  0  0  0  0  0  0  0  0  0
   -6.4212   -0.9130    1.9592 C   0  0  0  0  0  0  0  0  0  0  0  0
   -6.3271   -0.4952    2.9668 H   0  0  0  0  0  0  0  0  0  0  0  0
   -6.0289   -1.9347    1.9251 H   0  0  0  0  0  0  0  0  0  0  0  0
   -7.4698   -0.9029    1.6451 H   0  0  0  0  0  0  0  0  0  0  0  0
   -2.4496    1.2622    0.0815 C   0  0  0  0  0  0  0  0  0  0  0  0
   -2.4176    2.3231   -0.1871 H   0  0  0  0  0  0  0  0  0  0  0  0
   -1.9905    1.1676    1.0717 H   0  0  0  0  0  0  0  0  0  0  0  0
   -1.7013    0.4260   -0.9696 C   0  0  0  0  0  0  0  0  0  0  0  0
   -0.6854    0.8139   -1.0867 H   0  0  0  0  0  0  0  0  0  0  0  0
   -2.1837    0.5590   -1.9435 H   0  0  0  0  0  0  0  0  0  0  0  0
   -1.6484   -1.0405   -0.6231 C   0  0  0  0  0  0  0  0  0  0  0  0
   -2.3714   -1.9422   -1.3262 C   0  0  0  0  0  0  0  0  0  0  0  0
   -2.3412   -3.0001   -1.0905 H   0  0  0  0  0  0  0  0  0  0  0  0
   -3.0062   -1.6386   -2.1511 H   0  0  0  0  0  0  0  0  0  0  0  0
   -0.7694   -1.4875    0.5162 C   0  0  0  0  0  0  0  0  0  0  0  0
   -1.0050   -0.9402    1.4348 H   0  0  0  0  0  0  0  0  0  0  0  0
   -0.9059   -2.5524    0.7382 H   0  0  0  0  0  0  0  0  0  0  0  0
  1  2  1  0  0  0  0
  2  7  2  0  0  0  0
  2  3  1  0  0  0  0
  3  4  2  0  0  0  0
  4  5  1  0  0  0  0
  4 15  1  0  0  0  0
  5 16  1  0  0  0  0
  6 17  1  0  0  0  0
  6  5  2  0  0  0  0
  7  6  1  0  0  0  0
  8 12  1  0  0  0  0
  9  8  1  0  0  0  0
  9 10  1  0  0  0  0
 10  3  1  0  0  0  0
 10 11  2  0  0  0  0
 11 20  1  0  0  0  0
 12 49  1  0  0  0  0
 12 11  1  0  0  0  0
 13  1  1  0  0  0  0
 14  1  1  0  0  0  0
 18  7  1  0  0  0  0
 19  8  1  0  0  0  0
 21 23  1  0  0  0  0
 21  9  1  0  0  0  0
 22 21  1  0  0  0  0
 24 21  1  0  0  0  0
 25 29  1  0  0  0  0
 25 35  1  0  0  0  0
 26 25  1  0  0  0  0
 27 26  2  0  0  0  0
 27 28  1  0  0  0  0
 28 29  1  0  0  0  0
 29 32  1  0  0  0  0
 30 27  1  0  0  0  0
 31 26  1  0  0  0  0
 33 30  1  0  0  0  0
 34 30  1  0  0  0  0
 35 36  1  0  0  0  0
 37 35  1  0  0  0  0
 38 35  1  0  0  0  0
 39 28  1  0  0  0  0
 39 41  1  0  0  0  0
 40 39  1  0  0  0  0
 42 45  1  0  0  0  0
 42 39  1  0  0  0  0
 43 42  1  0  0  0  0
 44 42  1  0  0  0  0
 45 49  1  0  0  0  0
 46 47  1  0  0  0  0
 46 45  2  0  0  0  0
 48 46  1  0  0  0  0
 49 51  1  0  0  0  0
 49 50  1  0  0  0  0
M  END
>  <energy_and_gap>
-15.468 42.528

$$$$
BEA_40/Syn012031/Syn012031.car
 OpenBabel12061810373D

 50 52  0  0  1  0  0  0  0  0999 V2000
   -2.4213    2.2609    0.0456 N   0  0  0  0  0  0  0  0  0  0  0  0
   -3.6432    1.5477    0.0966 C   0  0  0  0  0  0  0  0  0  0  0  0
   -3.6958    0.1141    0.1270 C   0  0  0  0  0  0  0  0  0  0  0  0
   -4.9671   -0.5160    0.1558 C   0  0  0  0  0  0  0  0  0  0  0  0
   -6.1512    0.2421    0.1532 C   0  0  0  0  0  0  0  0  0  0  0  0
   -6.0909    1.6443    0.1266 C   0  0  0  0  0  0  0  0  0  0  0  0
   -4.8463    2.2959    0.0993 C   0  0  0  0  0  0  0  0  0  0  0  0
   -1.0680   -2.1825   -0.5206 C   0  0  0  0  0  0  0  0  0  0  0  0
   -2.1940   -1.5802   -0.8481 N   0  0  0  0  0  0  0  0  0  0  0  0
   -2.4974   -0.7205    0.1623 C   0  0  0  0  0  0  0  0  0  0  0  0
   -1.4575   -0.8554    1.1108 C   0  0  0  0  0  0  0  0  0  0  0  0
   -0.5909   -1.7731    0.6349 N   0  0  0  0  0  0  0  0  0  0  0  0
   -1.5286    1.7921   -0.0686 H   0  0  0  0  0  0  0  0  0  0  0  0
   -2.4203    3.2771    0.0790 H   0  0  0  0  0  0  0  0  0  0  0  0
   -5.0458   -1.5986    0.1877 H   0  0  0  0  0  0  0  0  0  0  0  0
   -7.1140   -0.2573    0.1758 H   0  0  0  0  0  0  0  0  0  0  0  0
   -7.0067    2.2258    0.1262 H   0  0  0  0  0  0  0  0  0  0  0  0
   -4.8265    3.3813    0.0747 H   0  0  0  0  0  0  0  0  0  0  0  0
   -0.5785   -2.9294   -1.1335 H   0  0  0  0  0  0  0  0  0  0  0  0
   -1.2221   -0.4123    2.0693 H   0  0  0  0  0  0  0  0  0  0  0  0
   -2.8710   -1.8837   -2.1091 C   0  0  0  0  0  0  0  0  0  0  0  0
   -2.1546   -2.3058   -2.8220 H   0  0  0  0  0  0  0  0  0  0  0  0
   -3.2845   -0.9565   -2.5181 H   0  0  0  0  0  0  0  0  0  0  0  0
   -3.6699   -2.6029   -1.9025 H   0  0  0  0  0  0  0  0  0  0  0  0
    5.2626   -1.5821   -0.1383 C   0  0  0  0  0  0  0  0  0  0  0  0
    4.6792   -0.1957   -0.1571 C   0  0  2  0  0  0  0  0  0  0  0  0
    3.3747    0.0691   -0.1619 N   0  0  0  0  0  0  0  0  0  0  0  0
    3.2596    1.4193   -0.1739 C   0  0  0  0  0  0  0  0  0  0  0  0
    2.0883    2.1475   -0.1708 N   0  0  0  0  0  0  0  0  0  0  0  0
    4.5512    1.9658   -0.1833 C   0  0  0  0  0  0  0  0  0  0  0  0
    5.4032    0.9184   -0.1752 N   0  0  0  0  0  0  0  0  0  0  0  0
    5.1456   -2.0470   -1.1213 H   0  0  0  0  0  0  0  0  0  0  0  0
    4.7554   -2.2005    0.6075 H   0  0  0  0  0  0  0  0  0  0  0  0
    6.3267   -1.5679    0.1117 H   0  0  0  0  0  0  0  0  0  0  0  0
    1.1843    1.6883   -0.1448 H   0  0  0  0  0  0  0  0  0  0  0  0
    2.1013    3.1636   -0.1877 H   0  0  0  0  0  0  0  0  0  0  0  0
    4.9769    2.9607   -0.1934 H   0  0  0  0  0  0  0  0  0  0  0  0
    6.8579    1.0661   -0.1838 C   0  0  0  0  0  0  0  0  0  0  0  0
    7.2462    0.6867    0.7668 H   0  0  0  0  0  0  0  0  0  0  0  0
    7.2590    0.4894   -1.0235 H   0  0  0  0  0  0  0  0  0  0  0  0
    7.1235    2.1217   -0.3013 H   0  0  0  0  0  0  0  0  0  0  0  0
    0.6370   -2.2371    1.2841 C   0  0  0  0  0  0  0  0  0  0  0  0
    0.9525   -3.1652    0.7940 H   0  0  0  0  0  0  0  0  0  0  0  0
    0.3727   -2.4847    2.3179 H   0  0  0  0  0  0  0  0  0  0  0  0
    1.7660   -1.1938    1.2624 C   0  0  0  0  0  0  0  0  0  0  0  0
    2.5968   -1.5604    1.8730 H   0  0  0  0  0  0  0  0  0  0  0  0
    1.4266   -0.2646    1.7310 H   0  0  0  0  0  0  0  0  0  0  0  0
    2.2713   -0.9011   -0.1610 C   0  0  0  0  0  0  0  0  0  0  0  0
    2.6236   -1.8173   -0.6463 H   0  0  0  0  0  0  0  0  0  0  0  0
    1.4763   -0.4955   -0.7947 H   0  0  0  0  0  0  0  0  0  0  0  0
  1 14  1  0  0  0  0
  1  2  1  0  0  0  0
  2  7  2  0  0  0  0
  2  3  1  0  0  0  0
  3  4  2  0  0  0  0
  3 10  1  0  0  0  0
  4 15  1  0  0  0  0
  5  4  1  0  0  0  0
  5 16  1  0  0  0  0
  6  5  2  0  0  0  0
  7  6  1  0  0  0  0
  8 12  1  0  0  0  0
  9  8  1  0  0  0  0
  9 10  1  0  0  0  0
 10 11  2  0  0  0  0
 11 20  1  0  0  0  0
 12 11  1  0  0  0  0
 12 42  1  0  0  0  0
 13  1  1  0  0  0  0
 17  6  1  0  0  0  0
 18  7  1  0  0  0  0
 19  8  1  0  0  0  0
 21 24  1  0  0  0  0
 21  9  1  0  0  0  0
 22 21  1  0  0  0  0
 23 21  1  0  0  0  0
 25 34  1  0  0  0  0
 25 33  1  0  0  0  0
 26 25  1  6  0  0  0
 27 48  1  0  0  0  0
 27 26  1  0  0  0  0
 28 29  1  0  0  0  0
 28 27  1  0  0  0  0
 29 35  1  0  0  0  0
 30 31  1  0  0  0  0
 30 28  2  0  0  0  0
 31 26  1  0  0  0  0
 32 25  1  0  0  0  0
 36 29  1  0  0  0  0
 37 30  1  0  0  0  0
 38 31  1  0  0  0  0
 38 39  1  0  0  0  0
 40 38  1  0  0  0  0
 41 38  1  0  0  0  0
 42 44  1  0  0  0  0
 43 42  1  0  0  0  0
 45 42  1  0  0  0  0
 45 47  1  0  0  0  0
 45 46  1  0  0  0  0
 48 45  1  0  0  0  0
 49 48  1  0  0  0  0
 50 48  1  0  0  0  0
M  END
>  <energy_and_gap>
-15.256 42.225

$$$$
BEA_40/Syn029849/Syn029849.car
 OpenBabel12061810373D

 47 49  0  0  1  0  0  0  0  0999 V2000
    2.6611    1.4009    0.1537 N   0  0  0  0  0  0  0  0  0  0  0  0
    1.3568    1.6374    0.0536 C   0  0  2  0  0  0  0  0  0  0  0  0
    0.6789    0.5543   -0.2868 N   0  0  0  0  0  0  0  0  0  0  0  0
    2.8573    0.0883   -0.1738 C   0  0  0  0  0  0  0  0  0  0  0  0
    1.5766   -0.4437   -0.4279 C   0  0  0  0  0  0  0  0  0  0  0  0
    4.1768   -0.5351   -0.2030 C   0  0  0  0  0  0  0  0  0  0  0  0
    0.7603    2.8657    0.2709 N   0  0  0  0  0  0  0  0  0  0  0  0
    4.4207   -1.7139    0.5459 C   0  0  0  0  0  0  0  0  0  0  0  0
    5.2210   -0.0074   -1.0066 C   0  0  0  0  0  0  0  0  0  0  0  0
    6.4817   -0.6334   -1.0405 C   0  0  0  0  0  0  0  0  0  0  0  0
    5.6837   -2.3353    0.5080 C   0  0  0  0  0  0  0  0  0  0  0  0
    6.7138   -1.7950   -0.2825 C   0  0  0  0  0  0  0  0  0  0  0  0
    1.1946   -1.4176   -0.7043 H   0  0  0  0  0  0  0  0  0  0  0  0
    1.3096    3.6930    0.4783 H   0  0  0  0  0  0  0  0  0  0  0  0
   -0.2461    2.9770    0.2127 H   0  0  0  0  0  0  0  0  0  0  0  0
    3.6421   -2.1510    1.1639 H   0  0  0  0  0  0  0  0  0  0  0  0
    5.0627    0.8821   -1.6088 H   0  0  0  0  0  0  0  0  0  0  0  0
    7.2749   -0.2209   -1.6548 H   0  0  0  0  0  0  0  0  0  0  0  0
    5.8630   -3.2336    1.0892 H   0  0  0  0  0  0  0  0  0  0  0  0
    7.6858   -2.2760   -0.3104 H   0  0  0  0  0  0  0  0  0  0  0  0
    3.6539    2.4009    0.5683 C   0  0  0  0  0  0  0  0  0  0  0  0
    3.2460    2.9962    1.3912 H   0  0  0  0  0  0  0  0  0  0  0  0
    3.8825    3.0351   -0.2941 H   0  0  0  0  0  0  0  0  0  0  0  0
    4.5582    1.9024    0.9273 H   0  0  0  0  0  0  0  0  0  0  0  0
   -3.9248    0.3631    0.4215 N   0  0  0  0  0  0  0  0  0  0  0  0
   -4.4437    0.6451   -0.7940 C   0  0  0  0  0  0  0  0  0  0  0  0
   -5.5484   -0.2123   -0.9546 C   0  0  0  0  0  0  0  0  0  0  0  0
   -5.6543   -0.9690    0.1583 N   0  0  0  0  0  0  0  0  0  0  0  0
   -4.6688   -0.5922    0.9499 C   0  0  0  0  0  0  0  0  0  0  0  0
   -6.3751   -0.2685   -2.0544 N   0  0  0  0  0  0  0  0  0  0  0  0
   -3.9546    1.4151   -1.3759 H   0  0  0  0  0  0  0  0  0  0  0  0
   -4.4856   -1.0193    1.9279 H   0  0  0  0  0  0  0  0  0  0  0  0
   -6.2297    0.3382   -2.8567 H   0  0  0  0  0  0  0  0  0  0  0  0
   -7.1526   -0.9206   -2.0859 H   0  0  0  0  0  0  0  0  0  0  0  0
   -6.6322   -2.0046    0.4789 C   0  0  0  0  0  0  0  0  0  0  0  0
   -6.5567   -2.7927   -0.2771 H   0  0  0  0  0  0  0  0  0  0  0  0
   -6.4207   -2.4156    1.4715 H   0  0  0  0  0  0  0  0  0  0  0  0
   -7.6284   -1.5510    0.4653 H   0  0  0  0  0  0  0  0  0  0  0  0
   -0.7586    0.3378   -0.4980 C   0  0  0  0  0  0  0  0  0  0  0  0
   -0.8938   -0.5548   -1.1198 H   0  0  0  0  0  0  0  0  0  0  0  0
   -1.1267    1.1894   -1.0801 H   0  0  0  0  0  0  0  0  0  0  0  0
   -1.5070    0.1970    0.7974 C   0  0  2  0  0  0  0  0  0  0  0  0
   -1.1134   -0.6963    1.6309 N   0  0  0  0  0  0  0  0  0  0  0  0
   -1.7034   -0.7331    2.4711 H   0  0  0  0  0  0  0  0  0  0  0  0
   -2.7626    0.9886    1.0517 C   0  0  0  0  0  0  0  0  0  0  0  0
   -2.6699    2.0042    0.6514 H   0  0  0  0  0  0  0  0  0  0  0  0
   -2.9784    1.0874    2.1222 H   0  0  0  0  0  0  0  0  0  0  0  0
  1 21  1  0  0  0  0
  2  1  1  0  0  0  0
  2  7  1  6  0  0  0
  3  2  1  0  0  0  0
  4  1  1  0  0  0  0
  5  3  1  0  0  0  0
  5  4  2  0  0  0  0
  6  4  1  0  0  0  0
  6  8  2  0  0  0  0
  7 14  1  0  0  0  0
  8 16  1  0  0  0  0
  9  6  1  0  0  0  0
 10  9  2  0  0  0  0
 10 12  1  0  0  0  0
 11  8  1  0  0  0  0
 11 19  1  0  0  0  0
 12 11  2  0  0  0  0
 13  5  1  0  0  0  0
 15  7  1  0  0  0  0
 17  9  1  0  0  0  0
 18 10  1  0  0  0  0
 20 12  1  0  0  0  0
 21 24  1  0  0  0  0
 21 22  1  0  0  0  0
 23 21  1  0  0  0  0
 25 29  1  0  0  0  0
 25 45  1  0  0  0  0
 26 25  1  0  0  0  0
 27 26  2  0  0  0  0
 27 28  1  0  0  0  0
 28 35  1  0  0  0  0
 28 29  1  0  0  0  0
 29 32  1  0  0  0  0
 30 27  1  0  0  0  0
 31 26  1  0  0  0  0
 33 30  1  0  0  0  0
 34 30  1  0  0  0  0
 35 37  1  0  0  0  0
 36 35  1  0  0  0  0
 38 35  1  0  0  0  0
 39  3  1  0  0  0  0
 40 39  1  0  0  0  0
 41 39  1  0  0  0  0
 42 39  1  6  0  0  0
 42 45  1  0  0  0  0
 42 43  1  0  0  0  0
 43 44  1  0  0  0  0
 45 47  1  0  0  0  0
 46 45  1  0  0  0  0
M  RAD  2  42   2  43   2
M  END
>  <energy_and_gap>
-15.154 41.988

$$$$
BEA_40/Syn093816/Syn093816.car
 OpenBabel12061810373D

 51 53  0  0  1  0  0  0  0  0999 V2000
   -1.0012    2.1597   -1.1975 N   0  0  0  0  0  0  0  0  0  0  0  0
    0.2488    2.0211   -0.6232 C   0  0  1  0  0  0  0  0  0  0  0  0
    1.0059    0.9273   -0.6936 N   0  0  0  0  0  0  0  0  0  0  0  0
    2.1554    1.1966   -0.0003 C   0  0  0  0  0  0  0  0  0  0  0  0
    2.0305    2.5208    0.4677 C   0  0  0  0  0  0  0  0  0  0  0  0
    0.8317    2.9861    0.0654 N   0  0  0  0  0  0  0  0  0  0  0  0
    3.2408    0.2325    0.1356 C   0  0  1  0  0  0  0  0  0  0  0  0
    4.5049    0.4923   -0.4466 C   0  0  0  0  0  0  0  0  0  0  0  0
    5.5294   -0.4585   -0.2807 C   0  0  0  0  0  0  0  0  0  0  0  0
    5.3824   -1.6173    0.4156 N   0  0  0  0  0  0  0  0  0  0  0  0
    4.1670   -1.8466    0.9793 C   0  0  0  0  0  0  0  0  0  0  0  0
    3.0752   -0.9646    0.8750 C   0  0  0  0  0  0  0  0  0  0  0  0
   -1.5247    3.0237   -1.1014 H   0  0  0  0  0  0  0  0  0  0  0  0
   -1.4262    1.4131   -1.7359 H   0  0  0  0  0  0  0  0  0  0  0  0
    2.6526    3.1916    1.0453 H   0  0  0  0  0  0  0  0  0  0  0  0
    4.6945    1.3968   -1.0168 H   0  0  0  0  0  0  0  0  0  0  0  0
    6.5040   -0.2783   -0.7251 H   0  0  0  0  0  0  0  0  0  0  0  0
    4.0570   -2.7699    1.5400 H   0  0  0  0  0  0  0  0  0  0  0  0
    2.1362   -1.2085    1.3612 H   0  0  0  0  0  0  0  0  0  0  0  0
    0.3488    4.3319    0.3758 C   0  0  0  0  0  0  0  0  0  0  0  0
    1.0917    4.8654    0.9775 H   0  0  0  0  0  0  0  0  0  0  0  0
    0.1832    4.8631   -0.5671 H   0  0  0  0  0  0  0  0  0  0  0  0
   -0.5867    4.2402    0.9369 H   0  0  0  0  0  0  0  0  0  0  0  0
    6.5089   -2.5421    0.5318 C   0  0  0  0  0  0  0  0  0  0  0  0
    6.8224   -2.8358   -0.4755 H   0  0  0  0  0  0  0  0  0  0  0  0
    7.3231   -2.0312    1.0564 H   0  0  0  0  0  0  0  0  0  0  0  0
    6.2028   -3.4288    1.0963 H   0  0  0  0  0  0  0  0  0  0  0  0
   -4.0715   -0.6637    0.7168 C   0  0  1  0  0  0  0  0  0  0  0  0
   -5.3170   -0.2413    0.5717 N   0  0  0  0  0  0  0  0  0  0  0  0
   -5.8490   -0.9217   -0.4668 C   0  0  0  0  0  0  0  0  0  0  0  0
   -4.8497   -1.7841   -0.9467 C   0  0  0  0  0  0  0  0  0  0  0  0
   -3.7543   -1.5899   -0.1765 N   0  0  0  0  0  0  0  0  0  0  0  0
   -3.2054   -0.1864    1.6797 N   0  0  0  0  0  0  0  0  0  0  0  0
   -6.8741   -0.7053   -0.7354 H   0  0  0  0  0  0  0  0  0  0  0  0
   -4.7804   -2.5126   -1.7432 H   0  0  0  0  0  0  0  0  0  0  0  0
   -2.2577   -0.5399    1.7542 H   0  0  0  0  0  0  0  0  0  0  0  0
   -3.5004    0.5257    2.3399 H   0  0  0  0  0  0  0  0  0  0  0  0
   -6.0491    0.7637    1.3417 C   0  0  0  0  0  0  0  0  0  0  0  0
   -7.0673    0.8615    0.9514 H   0  0  0  0  0  0  0  0  0  0  0  0
   -5.5215    1.7184    1.2490 H   0  0  0  0  0  0  0  0  0  0  0  0
   -6.0808    0.4396    2.3868 H   0  0  0  0  0  0  0  0  0  0  0  0
   -2.5072   -2.3306   -0.3937 C   0  0  0  0  0  0  0  0  0  0  0  0
   -2.1240   -2.6248    0.5896 H   0  0  0  0  0  0  0  0  0  0  0  0
   -2.7373   -3.2506   -0.9418 H   0  0  0  0  0  0  0  0  0  0  0  0
   -1.5200   -1.5098   -1.1603 C   0  0  0  0  0  0  0  0  0  0  0  0
   -1.7977   -1.2065   -2.1643 H   0  0  0  0  0  0  0  0  0  0  0  0
   -0.3208   -1.1423   -0.6598 C   0  0  0  0  0  0  0  0  0  0  0  0
   -0.0429   -1.4597    0.3390 H   0  0  0  0  0  0  0  0  0  0  0  0
    0.6583   -0.3053   -1.4225 C   0  0  0  0  0  0  0  0  0  0  0  0
    0.2714   -0.0122   -2.4048 H   0  0  0  0  0  0  0  0  0  0  0  0
    1.5715   -0.8769   -1.6089 H   0  0  0  0  0  0  0  0  0  0  0  0
  1 13  1  0  0  0  0
  2  1  1  6  0  0  0
  2  6  1  0  0  0  0
  3  2  1  0  0  0  0
  3  4  1  0  0  0  0
  4  5  2  0  0  0  0
  5 15  1  0  0  0  0
  6 20  1  0  0  0  0
  6  5  1  0  0  0  0
  7  4  1  1  0  0  0
  7 12  1  0  0  0  0
  8  9  2  0  0  0  0
  8  7  1  0  0  0  0
  9 10  1  0  0  0  0
 10 24  1  0  0  0  0
 10 11  1  0  0  0  0
 11 18  1  0  0  0  0
 12 11  2  0  0  0  0
 12 19  1  0  0  0  0
 14  1  1  0  0  0  0
 16  8  1  0  0  0  0
 17  9  1  0  0  0  0
 20 23  1  0  0  0  0
 20 21  1  0  0  0  0
 22 20  1  0  0  0  0
 24 26  1  0  0  0  0
 24 27  1  0  0  0  0
 25 24  1  0  0  0  0
 28 33  1  6  0  0  0
 29 28  1  0  0  0  0
 29 38  1  0  0  0  0
 30 29  1  0  0  0  0
 31 30  2  0  0  0  0
 31 32  1  0  0  0  0
 32 28  1  0  0  0  0
 33 36  1  0  0  0  0
 33 37  1  0  0  0  0
 34 30  1  0  0  0  0
 35 31  1  0  0  0  0
 38 41  1  0  0  0  0
 39 38  1  0  0  0  0
 40 38  1  0  0  0  0
 42 32  1  0  0  0  0
 42 43  1  0  0  0  0
 44 42  1  0  0  0  0
 45 47  2  0  0  0  0
 45 42  1  0  0  0  0
 46 45  1  0  0  0  0
 47 48  1  0  0  0  0
 49  3  1  0  0  0  0
 49 47  1  0  0  0  0
 50 49  1  0  0  0  0
 51 49  1  0  0  0  0
M  END
>  <energy_and_gap>
-15.424 41.364

$$$$
BEA_40/Syn036285/Syn036285.car
 OpenBabel12061810373D

 47 50  0  0  1  0  0  0  0  0999 V2000
   -5.0858    2.8020   -0.0600 N   0  0  0  0  0  0  0  0  0  0  0  0
   -4.0499    1.8396   -0.0054 C   0  0  0  0  0  0  0  0  0  0  0  0
   -2.7202    2.3234   -0.0043 C   0  0  0  0  0  0  0  0  0  0  0  0
   -1.6224    1.4496    0.0163 C   0  0  0  0  0  0  0  0  0  0  0  0
   -1.8985    0.0844    0.0134 C   0  0  0  0  0  0  0  0  0  0  0  0
   -3.1891   -0.4106    0.0149 C   0  0  0  0  0  0  0  0  0  0  0  0
   -3.0936   -1.7123   -0.0126 N   0  0  0  0  0  0  0  0  0  0  0  0
   -1.8161   -2.0003   -0.0107 C   0  0  0  0  0  0  0  0  0  0  0  0
   -1.0715   -0.9227    0.0048 N   0  0  0  0  0  0  0  0  0  0  0  0
   -4.3270    0.4277    0.0415 C   0  0  0  0  0  0  0  0  0  0  0  0
   -5.7297   -0.1278    0.0695 C   0  0  0  0  0  0  0  0  0  0  0  0
   -6.0581    2.5409   -0.1876 H   0  0  0  0  0  0  0  0  0  0  0  0
   -4.8695    3.7945   -0.0182 H   0  0  0  0  0  0  0  0  0  0  0  0
   -2.5243    3.3914   -0.0263 H   0  0  0  0  0  0  0  0  0  0  0  0
   -0.6133    1.8428    0.0146 H   0  0  0  0  0  0  0  0  0  0  0  0
   -1.4253   -3.0117   -0.0231 H   0  0  0  0  0  0  0  0  0  0  0  0
   -6.4525    0.5919    0.4593 H   0  0  0  0  0  0  0  0  0  0  0  0
   -6.0405   -0.4244   -0.9367 H   0  0  0  0  0  0  0  0  0  0  0  0
   -5.7959   -0.9883    0.7387 H   0  0  0  0  0  0  0  0  0  0  0  0
   -4.0477   -2.8241   -0.0500 C   0  0  0  0  0  0  0  0  0  0  0  0
   -3.5373   -3.7630   -0.2919 H   0  0  0  0  0  0  0  0  0  0  0  0
   -4.7925   -2.6167   -0.8242 H   0  0  0  0  0  0  0  0  0  0  0  0
   -4.5199   -2.9030    0.9343 H   0  0  0  0  0  0  0  0  0  0  0  0
    5.4737    0.9630   -0.0002 N   0  0  0  0  0  0  0  0  0  0  0  0
    5.5842   -0.3799   -0.0030 C   0  0  0  0  0  0  0  0  0  0  0  0
    4.2682   -0.8794   -0.0021 C   0  0  0  0  0  0  0  0  0  0  0  0
    3.4130    0.1751    0.0011 N   0  0  0  0  0  0  0  0  0  0  0  0
    4.1867    1.2496    0.0022 C   0  0  0  0  0  0  0  0  0  0  0  0
    3.9331   -2.2155   -0.0043 N   0  0  0  0  0  0  0  0  0  0  0  0
    6.5839   -0.7946   -0.0052 H   0  0  0  0  0  0  0  0  0  0  0  0
    3.8212    2.2694    0.0047 H   0  0  0  0  0  0  0  0  0  0  0  0
    4.6497   -2.9363   -0.0067 H   0  0  0  0  0  0  0  0  0  0  0  0
    2.9660   -2.5174   -0.0035 H   0  0  0  0  0  0  0  0  0  0  0  0
    6.5894    1.9027    0.0001 C   0  0  0  0  0  0  0  0  0  0  0  0
    7.1857    1.7293   -0.9015 H   0  0  0  0  0  0  0  0  0  0  0  0
    6.2008    2.9264    0.0027 H   0  0  0  0  0  0  0  0  0  0  0  0
    7.1882    1.7258    0.8994 H   0  0  0  0  0  0  0  0  0  0  0  0
    0.3919   -1.1290    0.0030 C   0  0  2  0  0  0  0  0  0  0  0  0
    0.6290   -2.1998    0.0014 H   0  0  0  0  0  0  0  0  0  0  0  0
    1.1749   -0.3717    1.0965 C   0  0  0  0  0  0  0  0  0  0  0  0
    0.5588    0.2812    1.7224 H   0  0  0  0  0  0  0  0  0  0  0  0
    1.7946   -1.0274    1.7160 H   0  0  0  0  0  0  0  0  0  0  0  0
    1.9539    0.3892    0.0036 C   0  0  2  0  0  0  0  0  0  0  0  0
    1.7247    1.4616    0.0059 H   0  0  0  0  0  0  0  0  0  0  0  0
    1.1718   -0.3677   -1.0898 C   0  0  0  0  0  0  0  0  0  0  0  0
    0.5536    0.2876   -1.7112 H   0  0  0  0  0  0  0  0  0  0  0  0
    1.7896   -1.0211   -1.7137 H   0  0  0  0  0  0  0  0  0  0  0  0
  1 13  1  0  0  0  0
  1  2  1  0  0  0  0
  2  3  1  0  0  0  0
  2 10  2  0  0  0  0
  3  4  2  0  0  0  0
  5  6  2  0  0  0  0
  5  4  1  0  0  0  0
  6 10  1  0  0  0  0
  7  8  1  0  0  0  0
  7  6  1  0  0  0  0
  8  9  1  0  0  0  0
  9  5  1  0  0  0  0
 10 11  1  0  0  0  0
 11 17  1  0  0  0  0
 11 19  1  0  0  0  0
 12  1  1  0  0  0  0
 14  3  1  0  0  0  0
 15  4  1  0  0  0  0
 16  8  1  0  0  0  0
 18 11  1  0  0  0  0
 20  7  1  0  0  0  0
 20 23  1  0  0  0  0
 21 20  1  0  0  0  0
 22 20  1  0  0  0  0
 24 34  1  0  0  0  0
 24 28  1  0  0  0  0
 25 26  2  0  0  0  0
 25 24  1  0  0  0  0
 26 27  1  0  0  0  0
 27 28  1  0  0  0  0
 27 43  1  0  0  0  0
 28 31  1  0  0  0  0
 29 33  1  0  0  0  0
 29 26  1  0  0  0  0
 30 25  1  0  0  0  0
 32 29  1  0  0  0  0
 34 36  1  0  0  0  0
 34 37  1  0  0  0  0
 35 34  1  0  0  0  0
 38 39  1  6  0  0  0
 38  9  1  0  0  0  0
 38 40  1  0  0  0  0
 40 42  1  0  0  0  0
 40 41  1  0  0  0  0
 43 44  1  1  0  0  0
 43 40  1  0  0  0  0
 45 38  1  0  0  0  0
 45 43  1  0  0  0  0
 46 45  1  0  0  0  0
 47 45  1  0  0  0  0
M  END
>  <energy_and_gap>
-15.138 40.305

$$$$
BEA_40/Syn045681/Syn045681.car
 OpenBabel12061810373D

 47 49  0  0  1  0  0  0  0  0999 V2000
    2.5137    1.4088    0.1116 N   0  0  0  0  0  0  0  0  0  0  0  0
    1.2015    1.6108    0.0447 C   0  0  2  0  0  0  0  0  0  0  0  0
    0.5392    0.4973   -0.2200 N   0  0  0  0  0  0  0  0  0  0  0  0
    2.7304    0.0865   -0.1586 C   0  0  0  0  0  0  0  0  0  0  0  0
    1.4552   -0.4861   -0.3433 C   0  0  0  0  0  0  0  0  0  0  0  0
    4.0629   -0.5079   -0.2025 C   0  0  0  0  0  0  0  0  0  0  0  0
    0.5826    2.8345    0.2227 N   0  0  0  0  0  0  0  0  0  0  0  0
    4.3596   -1.6427    0.5939 C   0  0  0  0  0  0  0  0  0  0  0  0
    5.0671    0.0030   -1.0657 C   0  0  0  0  0  0  0  0  0  0  0  0
    6.3407   -0.5954   -1.1121 C   0  0  0  0  0  0  0  0  0  0  0  0
    5.6353   -2.2366    0.5432 C   0  0  0  0  0  0  0  0  0  0  0  0
    6.6255   -1.7128   -0.3071 C   0  0  0  0  0  0  0  0  0  0  0  0
    1.0875   -1.4804   -0.5595 H   0  0  0  0  0  0  0  0  0  0  0  0
   -0.4279    2.9187    0.1976 H   0  0  0  0  0  0  0  0  0  0  0  0
    1.1181    3.6836    0.3691 H   0  0  0  0  0  0  0  0  0  0  0  0
    3.6124   -2.0661    1.2584 H   0  0  0  0  0  0  0  0  0  0  0  0
    4.8677    0.8581   -1.7044 H   0  0  0  0  0  0  0  0  0  0  0  0
    7.1032   -0.1959   -1.7722 H   0  0  0  0  0  0  0  0  0  0  0  0
    5.8552   -3.1010    1.1607 H   0  0  0  0  0  0  0  0  0  0  0  0
    7.6074   -2.1726   -0.3447 H   0  0  0  0  0  0  0  0  0  0  0  0
    3.4950    2.4500    0.4436 C   0  0  0  0  0  0  0  0  0  0  0  0
    3.6803    3.0458   -0.4559 H   0  0  0  0  0  0  0  0  0  0  0  0
    3.0999    3.0760    1.2497 H   0  0  0  0  0  0  0  0  0  0  0  0
    4.4222    1.9902    0.7958 H   0  0  0  0  0  0  0  0  0  0  0  0
   -4.6678    0.0427   -0.5617 C   0  0  1  0  0  0  0  0  0  0  0  0
   -5.6214   -0.8733   -0.6163 N   0  0  0  0  0  0  0  0  0  0  0  0
   -5.6359   -1.5044    0.5773 C   0  0  0  0  0  0  0  0  0  0  0  0
   -4.6317   -0.9165    1.3629 C   0  0  0  0  0  0  0  0  0  0  0  0
   -4.0484    0.0457    0.6098 N   0  0  0  0  0  0  0  0  0  0  0  0
   -4.3610    0.8904   -1.6066 N   0  0  0  0  0  0  0  0  0  0  0  0
   -6.3611   -2.2942    0.7184 H   0  0  0  0  0  0  0  0  0  0  0  0
   -4.2577   -1.0647    2.3668 H   0  0  0  0  0  0  0  0  0  0  0  0
   -4.8635    0.8350   -2.4867 H   0  0  0  0  0  0  0  0  0  0  0  0
   -3.6383    1.5963   -1.5201 H   0  0  0  0  0  0  0  0  0  0  0  0
   -6.5288   -1.2026   -1.7151 C   0  0  0  0  0  0  0  0  0  0  0  0
   -7.1959   -2.0172   -1.4150 H   0  0  0  0  0  0  0  0  0  0  0  0
   -5.9274   -1.5122   -2.5759 H   0  0  0  0  0  0  0  0  0  0  0  0
   -7.1157   -0.3102   -1.9549 H   0  0  0  0  0  0  0  0  0  0  0  0
   -0.8998    0.2432   -0.3719 C   0  0  0  0  0  0  0  0  0  0  0  0
   -1.2954    1.0488   -0.9990 H   0  0  0  0  0  0  0  0  0  0  0  0
   -1.0375   -0.6917   -0.9272 H   0  0  0  0  0  0  0  0  0  0  0  0
   -1.6137    0.1804    0.9495 C   0  0  2  0  0  0  0  0  0  0  0  0
   -1.1141   -0.5557    1.8752 N   0  0  0  0  0  0  0  0  0  0  0  0
   -1.6850   -0.5507    2.7292 H   0  0  0  0  0  0  0  0  0  0  0  0
   -2.9464    0.8583    1.1396 C   0  0  0  0  0  0  0  0  0  0  0  0
   -3.1564    1.0622    2.1964 H   0  0  0  0  0  0  0  0  0  0  0  0
   -2.9641    1.8279    0.6321 H   0  0  0  0  0  0  0  0  0  0  0  0
  1 21  1  0  0  0  0
  2  1  1  0  0  0  0
  2  7  1  6  0  0  0
  3  2  1  0  0  0  0
  4  1  1  0  0  0  0
  5  3  1  0  0  0  0
  5  4  2  0  0  0  0
  6  4  1  0  0  0  0
  6  8  2  0  0  0  0
  7 15  1  0  0  0  0
  8 16  1  0  0  0  0
  9  6  1  0  0  0  0
 10  9  2  0  0  0  0
 10 12  1  0  0  0  0
 11  8  1  0  0  0  0
 11 19  1  0  0  0  0
 12 11  2  0  0  0  0
 13  5  1  0  0  0  0
 14  7  1  0  0  0  0
 17  9  1  0  0  0  0
 18 10  1  0  0  0  0
 20 12  1  0  0  0  0
 21 24  1  0  0  0  0
 21 23  1  0  0  0  0
 22 21  1  0  0  0  0
 25 30  1  6  0  0  0
 25 29  1  0  0  0  0
 26 25  1  0  0  0  0
 26 27  1  0  0  0  0
 27 31  1  0  0  0  0
 27 28  2  0  0  0  0
 28 32  1  0  0  0  0
 29 45  1  0  0  0  0
 29 28  1  0  0  0  0
 30 34  1  0  0  0  0
 33 30  1  0  0  0  0
 35 36  1  0  0  0  0
 35 26  1  0  0  0  0
 37 35  1  0  0  0  0
 38 35  1  0  0  0  0
 39  3  1  0  0  0  0
 40 39  1  0  0  0  0
 41 39  1  0  0  0  0
 42 39  1  6  0  0  0
 42 45  1  0  0  0  0
 42 43  1  0  0  0  0
 43 44  1  0  0  0  0
 45 46  1  0  0  0  0
 47 45  1  0  0  0  0
M  RAD  2  42   2  43   2
M  END
>  <energy_and_gap>
-15.676 40.229

$$$$
BEA_40/Syn022674/Syn022674.car
 OpenBabel12061810373D

 46 49  0  0  1  0  0  0  0  0999 V2000
   -3.0147   -3.3497    0.0000 N   0  0  0  0  0  0  0  0  0  0  0  0
   -3.1717   -1.9436    0.0000 C   0  0  0  0  0  0  0  0  0  0  0  0
   -4.4629   -1.3169    0.0000 C   0  0  0  0  0  0  0  0  0  0  0  0
   -5.6654   -2.0624    0.0000 N   0  0  0  0  0  0  0  0  0  0  0  0
   -4.5695    0.0990   -0.0000 C   0  0  0  0  0  0  0  0  0  0  0  0
   -3.3813    0.8301   -0.0000 C   0  0  0  0  0  0  0  0  0  0  0  0
   -3.2007    2.1143   -0.0000 N   0  0  0  0  0  0  0  0  0  0  0  0
   -1.9079    2.3117   -0.0000 C   0  0  0  0  0  0  0  0  0  0  0  0
   -1.2430    1.1782   -0.0000 N   0  0  0  0  0  0  0  0  0  0  0  0
   -2.1430    0.2336   -0.0000 C   0  0  0  0  0  0  0  0  0  0  0  0
   -1.9918   -1.1535    0.0000 C   0  0  0  0  0  0  0  0  0  0  0  0
   -2.0864   -3.7635    0.0000 H   0  0  0  0  0  0  0  0  0  0  0  0
   -3.8075   -3.9826    0.0000 H   0  0  0  0  0  0  0  0  0  0  0  0
   -6.5635   -1.5863    0.0000 H   0  0  0  0  0  0  0  0  0  0  0  0
   -5.6744   -3.0766   -0.0000 H   0  0  0  0  0  0  0  0  0  0  0  0
   -5.5366    0.5939   -0.0000 H   0  0  0  0  0  0  0  0  0  0  0  0
   -1.4527    3.2953   -0.0000 H   0  0  0  0  0  0  0  0  0  0  0  0
   -1.0110   -1.6162    0.0000 H   0  0  0  0  0  0  0  0  0  0  0  0
   -4.1919    3.1898   -0.0000 C   0  0  0  0  0  0  0  0  0  0  0  0
   -3.6853    4.1608   -0.0000 H   0  0  0  0  0  0  0  0  0  0  0  0
   -4.8075    3.0913    0.9001 H   0  0  0  0  0  0  0  0  0  0  0  0
   -4.8075    3.0913   -0.9001 H   0  0  0  0  0  0  0  0  0  0  0  0
    3.1481   -0.1952    0.0000 N   0  0  0  0  0  0  0  0  0  0  0  0
    3.9300    0.9113    0.0000 C   0  0  0  0  0  0  0  0  0  0  0  0
    5.2606    0.4542    0.0000 C   0  0  0  0  0  0  0  0  0  0  0  0
    5.2371   -0.8944   -0.0000 N   0  0  0  0  0  0  0  0  0  0  0  0
    3.9632   -1.2367   -0.0000 C   0  0  0  0  0  0  0  0  0  0  0  0
    6.3875    1.2457    0.0000 N   0  0  0  0  0  0  0  0  0  0  0  0
    3.4320    1.8716    0.0000 H   0  0  0  0  0  0  0  0  0  0  0  0
    3.6263   -2.2661   -0.0000 H   0  0  0  0  0  0  0  0  0  0  0  0
    7.3135    0.8294    0.0000 H   0  0  0  0  0  0  0  0  0  0  0  0
    6.3214    2.2597    0.0000 H   0  0  0  0  0  0  0  0  0  0  0  0
    6.3546   -1.8342   -0.0000 C   0  0  0  0  0  0  0  0  0  0  0  0
    5.9724   -2.8603   -0.0000 H   0  0  0  0  0  0  0  0  0  0  0  0
    6.9516   -1.6565   -0.9002 H   0  0  0  0  0  0  0  0  0  0  0  0
    6.9516   -1.6565    0.9002 H   0  0  0  0  0  0  0  0  0  0  0  0
    1.6864   -0.3561    0.0000 C   0  0  1  0  0  0  0  0  0  0  0  0
    1.4236   -1.4206    0.0000 H   0  0  0  0  0  0  0  0  0  0  0  0
    0.9471    0.4444    1.0932 C   0  0  0  0  0  0  0  0  0  0  0  0
    1.5997    1.0512    1.7290 H   0  0  0  0  0  0  0  0  0  0  0  0
    0.2793   -0.1727    1.7021 H   0  0  0  0  0  0  0  0  0  0  0  0
    0.2312    1.2646   -0.0000 C   0  0  1  0  0  0  0  0  0  0  0  0
    0.5577    2.3121   -0.0000 H   0  0  0  0  0  0  0  0  0  0  0  0
    0.9471    0.4444   -1.0932 C   0  0  0  0  0  0  0  0  0  0  0  0
    0.2793   -0.1727   -1.7021 H   0  0  0  0  0  0  0  0  0  0  0  0
    1.5997    1.0512   -1.7290 H   0  0  0  0  0  0  0  0  0  0  0  0
  1 13  1  0  0  0  0
  1 12  1  0  0  0  0
  2  1  1  0  0  0  0
  3  2  1  0  0  0  0
  4  3  1  0  0  0  0
  4 14  1  0  0  0  0
  5  3  2  0  0  0  0
  6  5  1  0  0  0  0
  6 10  2  0  0  0  0
  7  6  1  0  0  0  0
  8  7  1  0  0  0  0
  8  9  1  0  0  0  0
  9 42  1  0  0  0  0
  9 10  1  0  0  0  0
 10 11  1  0  0  0  0
 11  2  2  0  0  0  0
 11 18  1  0  0  0  0
 15  4  1  0  0  0  0
 16  5  1  0  0  0  0
 17  8  1  0  0  0  0
 19 20  1  0  0  0  0
 19  7  1  0  0  0  0
 19 21  1  0  0  0  0
 22 19  1  0  0  0  0
 23 37  1  0  0  0  0
 23 24  1  0  0  0  0
 24 29  1  0  0  0  0
 25 28  1  0  0  0  0
 25 24  2  0  0  0  0
 26 25  1  0  0  0  0
 27 26  1  0  0  0  0
 27 23  1  0  0  0  0
 28 31  1  0  0  0  0
 30 27  1  0  0  0  0
 32 28  1  0  0  0  0
 33 26  1  0  0  0  0
 33 36  1  0  0  0  0
 34 33  1  0  0  0  0
 35 33  1  0  0  0  0
 37 38  1  1  0  0  0
 37 39  1  0  0  0  0
 39 41  1  0  0  0  0
 39 40  1  0  0  0  0
 42 43  1  6  0  0  0
 42 39  1  0  0  0  0
 44 42  1  0  0  0  0
 44 37  1  0  0  0  0
 45 44  1  0  0  0  0
 46 44  1  0  0  0  0
M  END
>  <energy_and_gap>
-15.119 39.567

$$$$
BEA_40/Syn035176/Syn035176.car
 OpenBabel12061810373D

 48 50  0  0  0  0  0  0  0  0999 V2000
   -1.4114   -1.8949   -0.9466 N   0  0  0  0  0  0  0  0  0  0  0  0
   -2.6665   -1.8117   -0.2968 C   0  0  0  0  0  0  0  0  0  0  0  0
   -3.1678   -0.5848    0.2535 C   0  0  0  0  0  0  0  0  0  0  0  0
   -4.4471   -0.5917    0.8679 C   0  0  0  0  0  0  0  0  0  0  0  0
   -5.2110   -1.7701    0.9369 C   0  0  0  0  0  0  0  0  0  0  0  0
   -4.7119   -2.9667    0.3990 C   0  0  0  0  0  0  0  0  0  0  0  0
   -3.4478   -2.9908   -0.2138 C   0  0  0  0  0  0  0  0  0  0  0  0
   -1.9353    2.7061   -0.2551 C   0  0  0  0  0  0  0  0  0  0  0  0
   -2.8382    1.7615   -0.4318 N   0  0  0  0  0  0  0  0  0  0  0  0
   -2.4022    0.6595    0.2380 C   0  0  0  0  0  0  0  0  0  0  0  0
   -1.1662    1.0237    0.8195 C   0  0  0  0  0  0  0  0  0  0  0  0
   -0.9212    2.3056    0.4801 N   0  0  0  0  0  0  0  0  0  0  0  0
   -0.8530   -1.0710   -1.1452 H   0  0  0  0  0  0  0  0  0  0  0  0
   -1.0653   -2.7916   -1.2778 H   0  0  0  0  0  0  0  0  0  0  0  0
   -4.8552    0.3156    1.3031 H   0  0  0  0  0  0  0  0  0  0  0  0
   -6.1868   -1.7559    1.4107 H   0  0  0  0  0  0  0  0  0  0  0  0
   -5.3037   -3.8742    0.4555 H   0  0  0  0  0  0  0  0  0  0  0  0
   -3.0862   -3.9280   -0.6263 H   0  0  0  0  0  0  0  0  0  0  0  0
   -2.0081    3.7033   -0.6713 H   0  0  0  0  0  0  0  0  0  0  0  0
   -0.4238    0.5308    1.4330 H   0  0  0  0  0  0  0  0  0  0  0  0
   -4.0340    2.0058   -1.2386 C   0  0  0  0  0  0  0  0  0  0  0  0
   -4.8593    2.2459   -0.5608 H   0  0  0  0  0  0  0  0  0  0  0  0
   -4.2598    1.1032   -1.8149 H   0  0  0  0  0  0  0  0  0  0  0  0
   -3.8530    2.8386   -1.9268 H   0  0  0  0  0  0  0  0  0  0  0  0
    4.8676   -1.6286    0.4072 N   0  0  0  0  0  0  0  0  0  0  0  0
    3.8922   -1.9591   -0.4655 C   0  0  0  0  0  0  0  0  0  0  0  0
    3.2980   -0.7459   -0.8621 C   0  0  0  0  0  0  0  0  0  0  0  0
    3.9319    0.2608   -0.2181 N   0  0  0  0  0  0  0  0  0  0  0  0
    4.8596   -0.3145    0.5256 C   0  0  0  0  0  0  0  0  0  0  0  0
    2.2510   -0.6142   -1.7480 N   0  0  0  0  0  0  0  0  0  0  0  0
    3.7566   -3.0106   -0.6823 H   0  0  0  0  0  0  0  0  0  0  0  0
    5.5418    0.2301    1.1663 H   0  0  0  0  0  0  0  0  0  0  0  0
    1.8321   -1.4259   -2.1935 H   0  0  0  0  0  0  0  0  0  0  0  0
    1.8841    0.3016   -1.9862 H   0  0  0  0  0  0  0  0  0  0  0  0
    5.7540   -2.5698    1.0822 C   0  0  0  0  0  0  0  0  0  0  0  0
    5.1409   -3.2508    1.6813 H   0  0  0  0  0  0  0  0  0  0  0  0
    6.4439   -2.0176    1.7287 H   0  0  0  0  0  0  0  0  0  0  0  0
    6.3135   -3.1224    0.3204 H   0  0  0  0  0  0  0  0  0  0  0  0
    0.2554    3.0854    0.8581 C   0  0  0  0  0  0  0  0  0  0  0  0
    0.0269    4.1464    0.7101 H   0  0  0  0  0  0  0  0  0  0  0  0
    0.4242    2.9250    1.9291 H   0  0  0  0  0  0  0  0  0  0  0  0
    1.4406    2.6925    0.0367 C   0  0  0  0  0  0  0  0  0  0  0  0
    1.3967    2.8941   -1.0285 H   0  0  0  0  0  0  0  0  0  0  0  0
    2.5404    2.1097    0.5605 C   0  0  0  0  0  0  0  0  0  0  0  0
    2.5891    1.9187    1.6274 H   0  0  0  0  0  0  0  0  0  0  0  0
    3.7204    1.7088   -0.2658 C   0  0  0  0  0  0  0  0  0  0  0  0
    4.6245    2.2055    0.1030 H   0  0  0  0  0  0  0  0  0  0  0  0
    3.5984    1.9848   -1.3190 H   0  0  0  0  0  0  0  0  0  0  0  0
  1  2  1  0  0  0  0
  2  7  2  0  0  0  0
  2  3  1  0  0  0  0
  3  4  2  0  0  0  0
  4  5  1  0  0  0  0
  4 15  1  0  0  0  0
  5 16  1  0  0  0  0
  6 17  1  0  0  0  0
  6  5  2  0  0  0  0
  7  6  1  0  0  0  0
  8 12  1  0  0  0  0
  9  8  1  0  0  0  0
  9 10  1  0  0  0  0
 10  3  1  0  0  0  0
 10 11  2  0  0  0  0
 11 20  1  0  0  0  0
 12 11  1  0  0  0  0
 12 39  1  0  0  0  0
 13  1  1  0  0  0  0
 14  1  1  0  0  0  0
 18  7  1  0  0  0  0
 19  8  1  0  0  0  0
 21 22  1  0  0  0  0
 21  9  1  0  0  0  0
 23 21  1  0  0  0  0
 24 21  1  0  0  0  0
 25 29  1  0  0  0  0
 25 35  1  0  0  0  0
 26 25  1  0  0  0  0
 27 26  2  0  0  0  0
 27 28  1  0  0  0  0
 28 29  1  0  0  0  0
 29 32  1  0  0  0  0
 30 27  1  0  0  0  0
 31 26  1  0  0  0  0
 33 30  1  0  0  0  0
 34 30  1  0  0  0  0
 35 36  1  0  0  0  0
 35 37  1  0  0  0  0
 38 35  1  0  0  0  0
 39 41  1  0  0  0  0
 40 39  1  0  0  0  0
 42 44  2  0  0  0  0
 42 39  1  0  0  0  0
 43 42  1  0  0  0  0
 44 45  1  0  0  0  0
 46 28  1  0  0  0  0
 46 47  1  0  0  0  0
 46 44  1  0  0  0  0
 48 46  1  0  0  0  0
M  END
>  <energy_and_gap>
-15.193 39.009

$$$$
BEA_40/Syn052319/Syn052319.car
 OpenBabel12061810373D

 48 50  0  0  1  0  0  0  0  0999 V2000
    1.8441   -1.2993   -0.3439 N   0  0  0  0  0  0  0  0  0  0  0  0
    0.5889   -1.1531   -0.7571 C   0  0  1  0  0  0  0  0  0  0  0  0
    0.2798    0.1149   -0.9765 N   0  0  0  0  0  0  0  0  0  0  0  0
    2.4122   -0.0568   -0.3359 C   0  0  0  0  0  0  0  0  0  0  0  0
    1.3949    0.8368   -0.7266 C   0  0  0  0  0  0  0  0  0  0  0  0
    3.8044    0.1795    0.0335 C   0  0  0  0  0  0  0  0  0  0  0  0
   -0.2956   -2.1974   -0.9532 N   0  0  0  0  0  0  0  0  0  0  0  0
    4.8654   -0.4818   -0.6386 C   0  0  0  0  0  0  0  0  0  0  0  0
    4.1187    1.1162    1.0503 C   0  0  0  0  0  0  0  0  0  0  0  0
    5.4594    1.3675    1.3998 C   0  0  0  0  0  0  0  0  0  0  0  0
    6.2039   -0.2261   -0.2846 C   0  0  0  0  0  0  0  0  0  0  0  0
    6.5010    0.6959    0.7349 C   0  0  0  0  0  0  0  0  0  0  0  0
    1.3359    1.9078   -0.8690 H   0  0  0  0  0  0  0  0  0  0  0  0
   -1.2439   -2.0335   -1.2713 H   0  0  0  0  0  0  0  0  0  0  0  0
   -0.0141   -3.1624   -0.8160 H   0  0  0  0  0  0  0  0  0  0  0  0
    4.6617   -1.1897   -1.4362 H   0  0  0  0  0  0  0  0  0  0  0  0
    3.3330    1.6481    1.5784 H   0  0  0  0  0  0  0  0  0  0  0  0
    5.6902    2.0815    2.1832 H   0  0  0  0  0  0  0  0  0  0  0  0
    7.0082   -0.7389   -0.8013 H   0  0  0  0  0  0  0  0  0  0  0  0
    7.5331    0.8918    1.0057 H   0  0  0  0  0  0  0  0  0  0  0  0
    2.4470   -2.5831    0.0383 C   0  0  0  0  0  0  0  0  0  0  0  0
    2.7355   -3.1122   -0.8755 H   0  0  0  0  0  0  0  0  0  0  0  0
    1.7208   -3.1669    0.6126 H   0  0  0  0  0  0  0  0  0  0  0  0
    3.3202   -2.4112    0.6732 H   0  0  0  0  0  0  0  0  0  0  0  0
   -5.3996    0.0717    0.0718 N   0  0  0  0  0  0  0  0  0  0  0  0
   -4.9574   -1.1200    0.5231 C   0  0  0  0  0  0  0  0  0  0  0  0
   -3.6184   -0.9181    0.9091 C   0  0  0  0  0  0  0  0  0  0  0  0
   -3.3016    0.3749    0.6662 N   0  0  0  0  0  0  0  0  0  0  0  0
   -4.3998    0.9258    0.1772 C   0  0  0  0  0  0  0  0  0  0  0  0
   -2.7899   -1.8773    1.4493 N   0  0  0  0  0  0  0  0  0  0  0  0
   -5.6583   -1.9442    0.5137 H   0  0  0  0  0  0  0  0  0  0  0  0
   -4.4769    1.9675   -0.1088 H   0  0  0  0  0  0  0  0  0  0  0  0
   -3.1109   -2.8317    1.5876 H   0  0  0  0  0  0  0  0  0  0  0  0
   -1.8440   -1.6520    1.7381 H   0  0  0  0  0  0  0  0  0  0  0  0
   -6.7226    0.4101   -0.4407 C   0  0  0  0  0  0  0  0  0  0  0  0
   -6.6100    0.8078   -1.4546 H   0  0  0  0  0  0  0  0  0  0  0  0
   -7.1679    1.1592    0.2220 H   0  0  0  0  0  0  0  0  0  0  0  0
   -7.3425   -0.4920   -0.4588 H   0  0  0  0  0  0  0  0  0  0  0  0
   -2.0729    1.1463    0.8819 C   0  0  0  0  0  0  0  0  0  0  0  0
   -2.3211    1.9312    1.6059 H   0  0  0  0  0  0  0  0  0  0  0  0
   -1.3346    0.4982    1.3626 H   0  0  0  0  0  0  0  0  0  0  0  0
   -1.5146    1.7254   -0.3933 C   0  0  0  0  0  0  0  0  0  0  0  0
   -1.5244    3.0616   -0.6029 C   0  0  0  0  0  0  0  0  0  0  0  0
   -1.1274    3.4945   -1.5143 H   0  0  0  0  0  0  0  0  0  0  0  0
   -1.9289    3.7475    0.1331 H   0  0  0  0  0  0  0  0  0  0  0  0
   -0.9443    0.7905   -1.4303 C   0  0  0  0  0  0  0  0  0  0  0  0
   -1.6837    0.0343   -1.7069 H   0  0  0  0  0  0  0  0  0  0  0  0
   -0.6851    1.3226   -2.3532 H   0  0  0  0  0  0  0  0  0  0  0  0
  1  4  1  0  0  0  0
  1 21  1  0  0  0  0
  2  7  1  6  0  0  0
  2  1  1  0  0  0  0
  3  2  1  0  0  0  0
  3  5  1  0  0  0  0
  4  6  1  0  0  0  0
  5  4  2  0  0  0  0
  6  9  2  0  0  0  0
  7 15  1  0  0  0  0
  8 11  2  0  0  0  0
  8  6  1  0  0  0  0
  9 10  1  0  0  0  0
  9 17  1  0  0  0  0
 10 18  1  0  0  0  0
 11 12  1  0  0  0  0
 12 20  1  0  0  0  0
 12 10  2  0  0  0  0
 13  5  1  0  0  0  0
 14  7  1  0  0  0  0
 16  8  1  0  0  0  0
 19 11  1  0  0  0  0
 21 23  1  0  0  0  0
 21 24  1  0  0  0  0
 22 21  1  0  0  0  0
 25 29  1  0  0  0  0
 25 26  1  0  0  0  0
 26 27  2  0  0  0  0
 27 30  1  0  0  0  0
 28 39  1  0  0  0  0
 28 27  1  0  0  0  0
 29 28  1  0  0  0  0
 30 33  1  0  0  0  0
 30 34  1  0  0  0  0
 31 26  1  0  0  0  0
 32 29  1  0  0  0  0
 35 25  1  0  0  0  0
 35 37  1  0  0  0  0
 36 35  1  0  0  0  0
 38 35  1  0  0  0  0
 39 41  1  0  0  0  0
 39 40  1  0  0  0  0
 42 39  1  0  0  0  0
 43 42  2  0  0  0  0
 43 45  1  0  0  0  0
 44 43  1  0  0  0  0
 46  3  1  0  0  0  0
 46 42  1  0  0  0  0
 47 46  1  0  0  0  0
 48 46  1  0  0  0  0
M  END
>  <energy_and_gap>
-15.362 38.357

$$$$
BEA_40/Syn027189/Syn027189.car
 OpenBabel12061810373D

 50 52  0  0  1  0  0  0  0  0999 V2000
   -7.2183   -2.0075    0.4648 N   0  0  0  0  0  0  0  0  0  0  0  0
   -5.9672   -1.3746    0.2959 C   0  0  0  0  0  0  0  0  0  0  0  0
   -4.8557   -1.9429    0.9609 C   0  0  0  0  0  0  0  0  0  0  0  0
   -3.5949   -1.3396    0.8170 C   0  0  0  0  0  0  0  0  0  0  0  0
   -3.4548   -0.1779    0.0250 C   0  0  0  0  0  0  0  0  0  0  0  0
   -4.6256    0.3047   -0.6106 C   0  0  0  0  0  0  0  0  0  0  0  0
   -5.8669   -0.2557   -0.4925 N   0  0  0  0  0  0  0  0  0  0  0  0
   -2.1465    0.4532   -0.1448 C   0  0  0  0  0  0  0  0  0  0  0  0
   -0.8583   -0.0910   -0.3676 C   0  0  0  0  0  0  0  0  0  0  0  0
    0.0111    0.9355   -0.4452 N   0  0  0  0  0  0  0  0  0  0  0  0
   -0.6835    2.0369   -0.2656 C   0  0  0  0  0  0  0  0  0  0  0  0
   -1.9679    1.8034   -0.0720 N   0  0  0  0  0  0  0  0  0  0  0  0
   -8.0490   -1.6443    0.0102 H   0  0  0  0  0  0  0  0  0  0  0  0
   -7.3092   -2.8373    1.0451 H   0  0  0  0  0  0  0  0  0  0  0  0
   -4.9561   -2.8313    1.5774 H   0  0  0  0  0  0  0  0  0  0  0  0
   -2.7425   -1.7752    1.3294 H   0  0  0  0  0  0  0  0  0  0  0  0
   -4.5580    1.1783   -1.2525 H   0  0  0  0  0  0  0  0  0  0  0  0
   -0.4467   -1.0844   -0.4873 H   0  0  0  0  0  0  0  0  0  0  0  0
   -0.2349    3.0232   -0.2685 H   0  0  0  0  0  0  0  0  0  0  0  0
   -6.9709    0.3848   -1.2178 C   0  0  0  0  0  0  0  0  0  0  0  0
   -7.7281    0.6922   -0.4893 H   0  0  0  0  0  0  0  0  0  0  0  0
   -6.6213    1.2645   -1.7678 H   0  0  0  0  0  0  0  0  0  0  0  0
   -7.3860   -0.3421   -1.9235 H   0  0  0  0  0  0  0  0  0  0  0  0
   -2.8594    2.9362    0.1837 C   0  0  0  0  0  0  0  0  0  0  0  0
   -2.2941    3.7624    0.6288 H   0  0  0  0  0  0  0  0  0  0  0  0
   -3.2993    3.2474   -0.7692 H   0  0  0  0  0  0  0  0  0  0  0  0
   -3.6383    2.6206    0.8842 H   0  0  0  0  0  0  0  0  0  0  0  0
    4.2638   -0.6521    0.3777 N   0  0  0  0  0  0  0  0  0  0  0  0
    4.6641   -1.1084   -0.8299 C   0  0  0  0  0  0  0  0  0  0  0  0
    6.0561   -0.9057   -0.8815 C   0  0  0  0  0  0  0  0  0  0  0  0
    6.4391   -0.3433    0.2842 N   0  0  0  0  0  0  0  0  0  0  0  0
    5.3410   -0.2115    1.0030 C   0  0  0  0  0  0  0  0  0  0  0  0
    6.8810   -1.2256   -1.9367 N   0  0  0  0  0  0  0  0  0  0  0  0
    3.9037   -1.5127   -1.4847 H   0  0  0  0  0  0  0  0  0  0  0  0
    5.3215    0.2132    1.9988 H   0  0  0  0  0  0  0  0  0  0  0  0
    7.8787   -1.0438   -1.8884 H   0  0  0  0  0  0  0  0  0  0  0  0
    6.5149   -1.6498   -2.7845 H   0  0  0  0  0  0  0  0  0  0  0  0
    7.7738    0.0588    0.7187 C   0  0  0  0  0  0  0  0  0  0  0  0
    8.1514    0.8083    0.0159 H   0  0  0  0  0  0  0  0  0  0  0  0
    8.4155   -0.8280    0.7188 H   0  0  0  0  0  0  0  0  0  0  0  0
    7.7202    0.4832    1.7267 H   0  0  0  0  0  0  0  0  0  0  0  0
    1.4544    0.8590   -0.6723 C   0  0  0  0  0  0  0  0  0  0  0  0
    1.6319    0.0355   -1.3728 H   0  0  0  0  0  0  0  0  0  0  0  0
    1.7686    1.7830   -1.1722 H   0  0  0  0  0  0  0  0  0  0  0  0
    2.2040    0.6578    0.6122 C   0  0  2  0  0  0  0  0  0  0  0  0
    2.2670    1.6431    1.4317 N   0  0  0  0  0  0  0  0  0  0  0  0
    2.8010    1.4122    2.2784 H   0  0  0  0  0  0  0  0  0  0  0  0
    2.9012   -0.6432    0.9099 C   0  0  0  0  0  0  0  0  0  0  0  0
    2.9628   -0.8380    1.9872 H   0  0  0  0  0  0  0  0  0  0  0  0
    2.3619   -1.4864    0.4641 H   0  0  0  0  0  0  0  0  0  0  0  0
  1 14  1  0  0  0  0
  2  1  1  0  0  0  0
  2  3  2  0  0  0  0
  3 15  1  0  0  0  0
  4  3  1  0  0  0  0
  4 16  1  0  0  0  0
  5  4  1  0  0  0  0
  6  7  1  0  0  0  0
  6  5  2  0  0  0  0
  7  2  1  0  0  0  0
  8 12  1  0  0  0  0
  8  5  1  0  0  0  0
  9  8  2  0  0  0  0
 10  9  1  0  0  0  0
 10 11  1  0  0  0  0
 11 12  1  0  0  0  0
 12 24  1  0  0  0  0
 13  1  1  0  0  0  0
 17  6  1  0  0  0  0
 18  9  1  0  0  0  0
 19 11  1  0  0  0  0
 20  7  1  0  0  0  0
 20 21  1  0  0  0  0
 22 20  1  0  0  0  0
 23 20  1  0  0  0  0
 24 25  1  0  0  0  0
 24 27  1  0  0  0  0
 26 24  1  0  0  0  0
 28 48  1  0  0  0  0
 28 32  1  0  0  0  0
 29 28  1  0  0  0  0
 30 29  2  0  0  0  0
 30 31  1  0  0  0  0
 31 38  1  0  0  0  0
 31 32  1  0  0  0  0
 32 35  1  0  0  0  0
 33 36  1  0  0  0  0
 33 30  1  0  0  0  0
 34 29  1  0  0  0  0
 37 33  1  0  0  0  0
 38 40  1  0  0  0  0
 38 41  1  0  0  0  0
 39 38  1  0  0  0  0
 42 10  1  0  0  0  0
 43 42  1  0  0  0  0
 44 42  1  0  0  0  0
 45 42  1  6  0  0  0
 45 48  1  0  0  0  0
 45 46  1  0  0  0  0
 46 47  1  0  0  0  0
 48 49  1  0  0  0  0
 50 48  1  0  0  0  0
M  RAD  2  45   2  46   2
M  END
>  <energy_and_gap>
-15.120 26.302

$$$$
BEA_40/Syn045021/Syn045021.car
 OpenBabel12061810373D

 56 59  0  0  1  0  0  0  0  0999 V2000
   -0.6251    1.5692    2.6434 N   0  0  0  0  0  0  0  0  0  0  0  0
   -1.3635    0.8047    1.7551 C   0  0  2  0  0  0  0  0  0  0  0  0
   -0.8488   -0.2018    1.0704 N   0  0  0  0  0  0  0  0  0  0  0  0
   -1.8358   -0.7150    0.2911 C   0  0  0  0  0  0  0  0  0  0  0  0
   -1.7882   -1.7681   -0.6174 C   0  0  0  0  0  0  0  0  0  0  0  0
   -2.9933   -2.0707   -1.2760 C   0  0  0  0  0  0  0  0  0  0  0  0
   -4.1919   -1.3523   -1.0260 C   0  0  0  0  0  0  0  0  0  0  0  0
   -5.3705   -1.7203   -1.7212 C   0  0  0  0  0  0  0  0  0  0  0  0
   -6.5773   -1.0376   -1.4942 C   0  0  0  0  0  0  0  0  0  0  0  0
   -6.6281    0.0183   -0.5708 C   0  0  0  0  0  0  0  0  0  0  0  0
   -5.4740    0.4067    0.1329 C   0  0  0  0  0  0  0  0  0  0  0  0
   -4.2396   -0.2638   -0.0840 C   0  0  0  0  0  0  0  0  0  0  0  0
   -3.0194    0.0386    0.5589 C   0  0  0  0  0  0  0  0  0  0  0  0
   -2.6482    0.9902    1.4768 N   0  0  0  0  0  0  0  0  0  0  0  0
    0.3838    1.4817    2.6960 H   0  0  0  0  0  0  0  0  0  0  0  0
   -1.0570    2.2392    3.2693 H   0  0  0  0  0  0  0  0  0  0  0  0
   -0.8851   -2.3327   -0.8217 H   0  0  0  0  0  0  0  0  0  0  0  0
   -2.9884   -2.8868   -1.9927 H   0  0  0  0  0  0  0  0  0  0  0  0
   -7.4732   -1.3293   -2.0319 H   0  0  0  0  0  0  0  0  0  0  0  0
   -7.5651    0.5371   -0.3981 H   0  0  0  0  0  0  0  0  0  0  0  0
   -5.5767    1.2209    0.8363 H   0  0  0  0  0  0  0  0  0  0  0  0
   -3.5046    2.0434    2.0357 C   0  0  0  0  0  0  0  0  0  0  0  0
   -2.9328    2.7353    2.6560 H   0  0  0  0  0  0  0  0  0  0  0  0
   -3.9365    2.6131    1.2075 H   0  0  0  0  0  0  0  0  0  0  0  0
   -4.2786    1.5695    2.6475 H   0  0  0  0  0  0  0  0  0  0  0  0
   -5.3617   -2.5359   -2.4385 H   0  0  0  0  0  0  0  0  0  0  0  0
    5.7256   -0.7773   -0.1857 N   0  0  0  0  0  0  0  0  0  0  0  0
    5.4818   -1.7247    0.7429 C   0  0  0  0  0  0  0  0  0  0  0  0
    4.1106   -2.0269    0.6401 C   0  0  0  0  0  0  0  0  0  0  0  0
    3.5815   -1.2508   -0.3333 N   0  0  0  0  0  0  0  0  0  0  0  0
    4.5847   -0.5280   -0.7994 C   0  0  0  0  0  0  0  0  0  0  0  0
    3.4370   -2.9581    1.3996 N   0  0  0  0  0  0  0  0  0  0  0  0
    6.3181   -2.0554    1.3446 H   0  0  0  0  0  0  0  0  0  0  0  0
    4.4890    0.1946   -1.6001 H   0  0  0  0  0  0  0  0  0  0  0  0
    2.4544   -3.1518    1.2392 H   0  0  0  0  0  0  0  0  0  0  0  0
    3.9115   -3.4875    2.1260 H   0  0  0  0  0  0  0  0  0  0  0  0
    6.9896   -0.1199   -0.4979 C   0  0  0  0  0  0  0  0  0  0  0  0
    7.2598   -0.3647   -1.5303 H   0  0  0  0  0  0  0  0  0  0  0  0
    7.7617   -0.4813    0.1888 H   0  0  0  0  0  0  0  0  0  0  0  0
    6.8571    0.9604   -0.3779 H   0  0  0  0  0  0  0  0  0  0  0  0
    2.7013    3.5995   -2.1800 N   0  0  0  0  0  0  0  0  0  0  0  0
    3.2294    3.0829   -2.8779 H   0  0  0  0  0  0  0  0  0  0  0  0
    2.7186    4.6105   -2.2853 H   0  0  0  0  0  0  0  0  0  0  0  0
    2.0141    2.9566   -1.1703 C   0  0  0  0  0  0  0  0  0  0  0  0
    1.3325    3.7853   -0.2848 N   0  0  0  0  0  0  0  0  0  0  0  0
    1.3345    4.7984   -0.3687 H   0  0  0  0  0  0  0  0  0  0  0  0
    0.7936    3.4279    0.4983 H   0  0  0  0  0  0  0  0  0  0  0  0
    2.0511    1.5733   -1.1104 N   0  0  0  0  0  0  0  0  0  0  0  0
    1.3924    1.0966   -0.1751 N   0  0  0  0  0  0  0  0  0  0  0  0
    1.3690   -0.1900   -0.0338 C   0  0  0  0  0  0  0  0  0  0  0  0
    2.2158   -1.1424   -0.8563 C   0  0  0  0  0  0  0  0  0  0  0  0
    2.2725   -0.8421   -1.9092 H   0  0  0  0  0  0  0  0  0  0  0  0
    1.7868   -2.1497   -0.8530 H   0  0  0  0  0  0  0  0  0  0  0  0
    0.5266   -0.7327    1.0891 C   0  0  0  0  0  0  0  0  0  0  0  0
    0.4535   -1.8240    1.0436 H   0  0  0  0  0  0  0  0  0  0  0  0
    0.9818   -0.5040    2.0577 H   0  0  0  0  0  0  0  0  0  0  0  0
  1 15  1  0  0  0  0
  1 16  1  0  0  0  0
  2  1  1  6  0  0  0
  3 54  1  0  0  0  0
  3  2  1  0  0  0  0
  4 13  1  0  0  0  0
  4  3  1  0  0  0  0
  5  4  2  0  0  0  0
  6  7  1  0  0  0  0
  6  5  1  0  0  0  0
  7 12  1  0  0  0  0
  8  9  1  0  0  0  0
  8  7  2  0  0  0  0
  9 10  2  0  0  0  0
 10 20  1  0  0  0  0
 10 11  1  0  0  0  0
 11 21  1  0  0  0  0
 12 11  1  0  0  0  0
 12 13  2  0  0  0  0
 13 14  1  0  0  0  0
 14  2  1  0  0  0  0
 14 22  1  0  0  0  0
 17  5  1  0  0  0  0
 18  6  1  0  0  0  0
 19  9  1  0  0  0  0
 22 25  1  0  0  0  0
 22 23  1  0  0  0  0
 24 22  1  0  0  0  0
 26  8  1  0  0  0  0
 27 28  1  0  0  0  0
 28 33  1  0  0  0  0
 29 28  2  0  0  0  0
 29 32  1  0  0  0  0
 30 29  1  0  0  0  0
 31 30  1  0  0  0  0
 31 27  1  0  0  0  0
 32 36  1  0  0  0  0
 34 31  1  0  0  0  0
 35 32  1  0  0  0  0
 37 40  1  0  0  0  0
 37 27  1  0  0  0  0
 37 39  1  0  0  0  0
 38 37  1  0  0  0  0
 41 44  2  0  0  0  0
 42 41  1  0  0  0  0
 43 41  1  0  0  0  0
 44 48  1  0  0  0  0
 44 45  1  0  0  0  0
 45 47  1  0  0  0  0
 46 45  1  0  0  0  0
 48 49  1  0  0  0  0
 49 50  2  0  0  0  0
 50 54  1  0  0  0  0
 51 53  1  0  0  0  0
 51 30  1  0  0  0  0
 51 50  1  0  0  0  0
 52 51  1  0  0  0  0
 54 56  1  0  0  0  0
 55 54  1  0  0  0  0
M  RAD  1  48   2
M  END
>  <energy_and_gap>
-15.533  9.868

$$$$
BEA_40/Syn024140/Syn024140.car
 OpenBabel12061810373D

 48 51  0  0  1  0  0  0  0  0999 V2000
   -0.7767   -2.9849    0.0000 N   0  0  0  0  0  0  0  0  0  0  0  0
   -1.5826   -1.8590    0.0000 C   0  0  2  0  0  0  0  0  0  0  0  0
   -2.8949   -1.9325   -0.0000 N   0  0  0  0  0  0  0  0  0  0  0  0
   -3.3226   -0.7029   -0.0000 C   0  0  0  0  0  0  0  0  0  0  0  0
   -4.6337   -0.2162   -0.0000 C   0  0  0  0  0  0  0  0  0  0  0  0
   -4.8214    1.1886    0.0000 C   0  0  0  0  0  0  0  0  0  0  0  0
   -6.1513    1.6723    0.0000 N   0  0  0  0  0  0  0  0  0  0  0  0
   -3.6886    2.0623   -0.0000 C   0  0  0  0  0  0  0  0  0  0  0  0
   -3.8209    3.4712   -0.0000 N   0  0  0  0  0  0  0  0  0  0  0  0
   -2.3752    1.5269   -0.0000 C   0  0  0  0  0  0  0  0  0  0  0  0
   -2.2246    0.1330   -0.0000 C   0  0  0  0  0  0  0  0  0  0  0  0
   -1.1405   -0.6102    0.0000 N   0  0  0  0  0  0  0  0  0  0  0  0
   -1.1770   -3.9169    0.0000 H   0  0  0  0  0  0  0  0  0  0  0  0
    0.2329   -2.9249   -0.0000 H   0  0  0  0  0  0  0  0  0  0  0  0
   -5.4886   -0.8851    0.0000 H   0  0  0  0  0  0  0  0  0  0  0  0
   -6.9332    1.0228    0.0000 H   0  0  0  0  0  0  0  0  0  0  0  0
   -6.3678    2.6632    0.0000 H   0  0  0  0  0  0  0  0  0  0  0  0
   -2.9963    4.0656   -0.0000 H   0  0  0  0  0  0  0  0  0  0  0  0
   -4.7256    3.9300   -0.0000 H   0  0  0  0  0  0  0  0  0  0  0  0
   -1.5219    2.1961   -0.0000 H   0  0  0  0  0  0  0  0  0  0  0  0
   -3.6983   -3.1627   -0.0000 C   0  0  0  0  0  0  0  0  0  0  0  0
   -4.7656   -2.9290   -0.0000 H   0  0  0  0  0  0  0  0  0  0  0  0
   -3.4534   -3.7354   -0.9006 H   0  0  0  0  0  0  0  0  0  0  0  0
   -3.4534   -3.7354    0.9006 H   0  0  0  0  0  0  0  0  0  0  0  0
    3.4683   -0.2044    0.0000 N   0  0  0  0  0  0  0  0  0  0  0  0
    3.7349    1.1240    0.0000 C   0  0  0  0  0  0  0  0  0  0  0  0
    5.1366    1.2453    0.0000 C   0  0  0  0  0  0  0  0  0  0  0  0
    5.6615    0.0028   -0.0000 N   0  0  0  0  0  0  0  0  0  0  0  0
    4.6356   -0.8263   -0.0000 C   0  0  0  0  0  0  0  0  0  0  0  0
    5.8461    2.4255    0.0000 N   0  0  0  0  0  0  0  0  0  0  0  0
    2.8907    1.8002    0.0000 H   0  0  0  0  0  0  0  0  0  0  0  0
    4.7448   -1.9039   -0.0000 H   0  0  0  0  0  0  0  0  0  0  0  0
    6.8613    2.4202    0.0000 H   0  0  0  0  0  0  0  0  0  0  0  0
    5.3747    3.3257    0.0000 H   0  0  0  0  0  0  0  0  0  0  0  0
    7.0640   -0.4035   -0.0000 C   0  0  0  0  0  0  0  0  0  0  0  0
    7.5377    0.0008    0.9002 H   0  0  0  0  0  0  0  0  0  0  0  0
    7.5377    0.0008   -0.9002 H   0  0  0  0  0  0  0  0  0  0  0  0
    7.1304   -1.4965   -0.0000 H   0  0  0  0  0  0  0  0  0  0  0  0
    2.1978   -0.9452    0.0000 C   0  0  2  0  0  0  0  0  0  0  0  0
    2.3920   -2.0242   -0.0000 H   0  0  0  0  0  0  0  0  0  0  0  0
    1.1973   -0.5110   -1.0944 C   0  0  0  0  0  0  0  0  0  0  0  0
    1.5555    0.2940   -1.7441 H   0  0  0  0  0  0  0  0  0  0  0  0
    0.8187   -1.3460   -1.6912 H   0  0  0  0  0  0  0  0  0  0  0  0
    0.2257   -0.0225    0.0000 C   0  0  2  0  0  0  0  0  0  0  0  0
    0.1804    1.0691    0.0000 H   0  0  0  0  0  0  0  0  0  0  0  0
    1.1973   -0.5110    1.0944 C   0  0  0  0  0  0  0  0  0  0  0  0
    1.5555    0.2940    1.7441 H   0  0  0  0  0  0  0  0  0  0  0  0
    0.8187   -1.3460    1.6912 H   0  0  0  0  0  0  0  0  0  0  0  0
  1 13  1  0  0  0  0
  2  1  1  6  0  0  0
  3 21  1  0  0  0  0
  3  2  1  0  0  0  0
  4  3  1  0  0  0  0
  4  5  1  0  0  0  0
  5  6  2  0  0  0  0
  5 15  1  0  0  0  0
  6  7  1  0  0  0  0
  7 17  1  0  0  0  0
  7 16  1  0  0  0  0
  8  6  1  0  0  0  0
  9 19  1  0  0  0  0
  9  8  1  0  0  0  0
 10  8  2  0  0  0  0
 10 11  1  0  0  0  0
 11  4  2  0  0  0  0
 11 12  1  0  0  0  0
 12  2  1  0  0  0  0
 12 44  1  0  0  0  0
 14  1  1  0  0  0  0
 18  9  1  0  0  0  0
 20 10  1  0  0  0  0
 21 24  1  0  0  0  0
 22 21  1  0  0  0  0
 23 21  1  0  0  0  0
 25 26  1  0  0  0  0
 26 31  1  0  0  0  0
 27 30  1  0  0  0  0
 27 26  2  0  0  0  0
 28 27  1  0  0  0  0
 29 28  1  0  0  0  0
 29 25  1  0  0  0  0
 30 34  1  0  0  0  0
 32 29  1  0  0  0  0
 33 30  1  0  0  0  0
 35 28  1  0  0  0  0
 35 36  1  0  0  0  0
 37 35  1  0  0  0  0
 38 35  1  0  0  0  0
 39 40  1  6  0  0  0
 39 25  1  0  0  0  0
 39 46  1  0  0  0  0
 41 39  1  0  0  0  0
 41 44  1  0  0  0  0
 42 41  1  0  0  0  0
 43 41  1  0  0  0  0
 44 45  1  1  0  0  0
 44 46  1  0  0  0  0
 46 48  1  0  0  0  0
 46 47  1  0  0  0  0
M  END
>  <energy_and_gap>
-15.452  9.825

$$$$
BEA_40/Syn017526/Syn017526.car
 OpenBabel12061810373D

 45 47  0  0  1  0  0  0  0  0999 V2000
   -0.9941   -2.1543    0.3848 N   0  0  0  0  0  0  0  0  0  0  0  0
   -2.0357   -1.2198    0.1810 C   0  0  0  0  0  0  0  0  0  0  0  0
   -3.3555   -1.6309   -0.0251 N   0  0  0  0  0  0  0  0  0  0  0  0
   -4.3596   -0.6685   -0.1500 C   0  0  1  0  0  0  0  0  0  0  0  0
   -5.7159   -1.0602   -0.2691 N   0  0  0  0  0  0  0  0  0  0  0  0
   -4.1390    0.7325   -0.1503 C   0  0  0  0  0  0  0  0  0  0  0  0
   -2.8163    1.0998    0.0239 C   0  0  0  0  0  0  0  0  0  0  0  0
   -1.7708    0.1577    0.1971 C   0  0  0  0  0  0  0  0  0  0  0  0
   -0.6305    0.8922    0.3720 N   0  0  0  0  0  0  0  0  0  0  0  0
   -0.9715    2.1634    0.2886 C   0  0  0  0  0  0  0  0  0  0  0  0
   -2.2555    2.3288    0.0814 N   0  0  0  0  0  0  0  0  0  0  0  0
   -0.0289   -1.9233    0.1822 H   0  0  0  0  0  0  0  0  0  0  0  0
   -1.1938   -3.0797    0.7498 H   0  0  0  0  0  0  0  0  0  0  0  0
   -6.4392   -0.3776   -0.4821 H   0  0  0  0  0  0  0  0  0  0  0  0
   -6.0126   -2.0103   -0.0738 H   0  0  0  0  0  0  0  0  0  0  0  0
   -4.9356    1.4632   -0.2588 H   0  0  0  0  0  0  0  0  0  0  0  0
   -0.2793    2.9920    0.3821 H   0  0  0  0  0  0  0  0  0  0  0  0
   -3.6785   -3.0662   -0.1452 C   0  0  0  0  0  0  0  0  0  0  0  0
   -4.0013   -3.4300    0.8356 H   0  0  0  0  0  0  0  0  0  0  0  0
   -4.4628   -3.2105   -0.8937 H   0  0  0  0  0  0  0  0  0  0  0  0
   -2.8126   -3.6311   -0.4992 H   0  0  0  0  0  0  0  0  0  0  0  0
   -2.9179    3.6246   -0.0462 C   0  0  0  0  0  0  0  0  0  0  0  0
   -3.4217    3.6597   -1.0175 H   0  0  0  0  0  0  0  0  0  0  0  0
   -3.6428    3.7216    0.7684 H   0  0  0  0  0  0  0  0  0  0  0  0
   -2.1746    4.4263    0.0171 H   0  0  0  0  0  0  0  0  0  0  0  0
    2.9832    0.0673   -0.4079 N   0  0  0  0  0  0  0  0  0  0  0  0
    3.5106   -1.1599   -0.1994 C   0  0  0  0  0  0  0  0  0  0  0  0
    4.8897   -0.9627    0.0032 C   0  0  0  0  0  0  0  0  0  0  0  0
    5.1398    0.3605   -0.0916 N   0  0  0  0  0  0  0  0  0  0  0  0
    3.9779    0.9344   -0.3379 C   0  0  0  0  0  0  0  0  0  0  0  0
    5.8191   -1.9473    0.2540 N   0  0  0  0  0  0  0  0  0  0  0  0
    2.8323   -2.0024   -0.2234 H   0  0  0  0  0  0  0  0  0  0  0  0
    3.8503    2.0016   -0.4684 H   0  0  0  0  0  0  0  0  0  0  0  0
    5.5509   -2.9260    0.3096 H   0  0  0  0  0  0  0  0  0  0  0  0
    6.7981   -1.7143    0.3880 H   0  0  0  0  0  0  0  0  0  0  0  0
    6.4092    1.0697    0.0406 C   0  0  0  0  0  0  0  0  0  0  0  0
    7.0929    0.6941   -0.7274 H   0  0  0  0  0  0  0  0  0  0  0  0
    6.2463    2.1440   -0.0952 H   0  0  0  0  0  0  0  0  0  0  0  0
    6.8080    0.8744    1.0411 H   0  0  0  0  0  0  0  0  0  0  0  0
    1.1587   -0.4343   -1.2626 H   0  0  0  0  0  0  0  0  0  0  0  0
    1.5796    0.3856   -0.6708 C   0  0  0  0  0  0  0  0  0  0  0  0
    1.5527    1.2819   -1.3009 H   0  0  0  0  0  0  0  0  0  0  0  0
    0.7865    0.6029    0.6288 C   0  0  0  0  0  0  0  0  0  0  0  0
    0.8346   -0.2734    1.2815 H   0  0  0  0  0  0  0  0  0  0  0  0
    1.2161    1.4288    1.2087 H   0  0  0  0  0  0  0  0  0  0  0  0
  1 13  1  0  0  0  0
  2  8  2  0  0  0  0
  2  1  1  0  0  0  0
  3  2  1  0  0  0  0
  4  5  1  1  0  0  0
  4  3  1  0  0  0  0
  5 15  1  0  0  0  0
  6  4  1  0  0  0  0
  6  7  2  0  0  0  0
  7 11  1  0  0  0  0
  7  8  1  0  0  0  0
  8  9  1  0  0  0  0
  9 43  1  0  0  0  0
 10  9  1  0  0  0  0
 10 17  1  0  0  0  0
 11 10  1  0  0  0  0
 12  1  1  0  0  0  0
 14  5  1  0  0  0  0
 16  6  1  0  0  0  0
 18  3  1  0  0  0  0
 18 19  1  0  0  0  0
 20 18  1  0  0  0  0
 21 18  1  0  0  0  0
 22 25  1  0  0  0  0
 22 11  1  0  0  0  0
 22 24  1  0  0  0  0
 23 22  1  0  0  0  0
 26 30  1  0  0  0  0
 26 27  1  0  0  0  0
 27 28  2  0  0  0  0
 28 31  1  0  0  0  0
 29 28  1  0  0  0  0
 29 36  1  0  0  0  0
 30 29  1  0  0  0  0
 31 34  1  0  0  0  0
 31 35  1  0  0  0  0
 32 27  1  0  0  0  0
 33 30  1  0  0  0  0
 36 39  1  0  0  0  0
 37 36  1  0  0  0  0
 38 36  1  0  0  0  0
 40 41  1  0  0  0  0
 41 26  1  0  0  0  0
 41 43  1  0  0  0  0
 42 41  1  0  0  0  0
 43 45  1  0  0  0  0
 43 44  1  0  0  0  0
M  END
>  <energy_and_gap>
-15.028  9.211

$$$$
BEA_40/Syn045034/Syn045034.car
 OpenBabel12061810373D

 50 52  0  0  1  0  0  0  0  0999 V2000
   -0.8982    1.4028   -0.1310 N   0  0  0  0  0  0  0  0  0  0  0  0
   -0.9967    2.6969   -0.3225 C   0  0  2  0  0  0  0  0  0  0  0  0
   -0.4028    1.2973    1.1698 N   0  0  0  0  0  0  0  0  0  0  0  0
   -0.6297    3.4745    0.7202 C   0  0  0  0  0  0  0  0  0  0  0  0
   -0.2789    2.5240    1.6119 C   0  0  0  0  0  0  0  0  0  0  0  0
   -1.1912    0.2225   -0.9625 C   0  0  0  0  0  0  0  0  0  0  0  0
   -5.0247   -1.6925   -0.1630 N   0  0  0  0  0  0  0  0  0  0  0  0
   -1.4506    3.2456   -1.5057 N   0  0  0  0  0  0  0  0  0  0  0  0
   -2.5227   -0.4244   -0.6622 C   0  0  2  0  0  0  0  0  0  0  0  0
   -3.8783   -2.4089   -0.2965 C   0  0  0  0  0  0  0  0  0  0  0  0
   -4.9240   -0.3430   -0.2902 C   0  0  0  0  0  0  0  0  0  0  0  0
   -2.6195   -1.8326   -0.5477 C   0  0  0  0  0  0  0  0  0  0  0  0
   -3.7156    0.3328   -0.5409 C   0  0  0  0  0  0  0  0  0  0  0  0
   -0.6187    4.5506    0.8260 H   0  0  0  0  0  0  0  0  0  0  0  0
    0.0829    2.6919    2.6174 H   0  0  0  0  0  0  0  0  0  0  0  0
   -1.1666    0.5327   -2.0116 H   0  0  0  0  0  0  0  0  0  0  0  0
   -0.3649   -0.4811   -0.8344 H   0  0  0  0  0  0  0  0  0  0  0  0
   -1.7391    2.6592   -2.2815 H   0  0  0  0  0  0  0  0  0  0  0  0
   -1.5139    4.2521   -1.6366 H   0  0  0  0  0  0  0  0  0  0  0  0
   -3.9642   -3.4873   -0.2029 H   0  0  0  0  0  0  0  0  0  0  0  0
   -5.8447    0.2250   -0.1920 H   0  0  0  0  0  0  0  0  0  0  0  0
   -1.7453   -2.4673   -0.6512 H   0  0  0  0  0  0  0  0  0  0  0  0
   -3.7170    1.4126   -0.6421 H   0  0  0  0  0  0  0  0  0  0  0  0
   -6.3280   -2.3028    0.0955 C   0  0  0  0  0  0  0  0  0  0  0  0
   -6.7374   -1.8718    1.0152 H   0  0  0  0  0  0  0  0  0  0  0  0
   -6.9834   -2.0911   -0.7558 H   0  0  0  0  0  0  0  0  0  0  0  0
   -6.2123   -3.3849    0.2151 H   0  0  0  0  0  0  0  0  0  0  0  0
    5.1027   -1.2096   -0.5237 N   0  0  0  0  0  0  0  0  0  0  0  0
    4.5212   -0.4254   -1.4558 C   0  0  0  0  0  0  0  0  0  0  0  0
    3.4289    0.1920   -0.8172 C   0  0  0  0  0  0  0  0  0  0  0  0
    3.3936   -0.2399    0.4633 N   0  0  0  0  0  0  0  0  0  0  0  0
    4.4105   -1.0735    0.5912 C   0  0  0  0  0  0  0  0  0  0  0  0
    2.5488    1.0777   -1.3992 N   0  0  0  0  0  0  0  0  0  0  0  0
    4.9649   -0.4164   -2.4428 H   0  0  0  0  0  0  0  0  0  0  0  0
    4.6515   -1.5936    1.5098 H   0  0  0  0  0  0  0  0  0  0  0  0
    1.7905    1.4835   -0.8624 H   0  0  0  0  0  0  0  0  0  0  0  0
    2.6440    1.3516   -2.3734 H   0  0  0  0  0  0  0  0  0  0  0  0
    6.2784   -2.0465   -0.7351 C   0  0  0  0  0  0  0  0  0  0  0  0
    6.0438   -2.7784   -1.5148 H   0  0  0  0  0  0  0  0  0  0  0  0
    7.1077   -1.4030   -1.0460 H   0  0  0  0  0  0  0  0  0  0  0  0
    6.5304   -2.5596    0.1988 H   0  0  0  0  0  0  0  0  0  0  0  0
    2.4680    0.0821    1.5544 C   0  0  0  0  0  0  0  0  0  0  0  0
    2.3478    1.1697    1.5471 H   0  0  0  0  0  0  0  0  0  0  0  0
    2.9456   -0.1830    2.5048 H   0  0  0  0  0  0  0  0  0  0  0  0
    1.1451   -0.6232    1.4190 C   0  0  1  0  0  0  0  0  0  0  0  0
    1.1624   -1.8725    1.1206 N   0  0  0  0  0  0  0  0  0  0  0  0
    0.2280   -2.2973    1.1527 H   0  0  0  0  0  0  0  0  0  0  0  0
   -0.1372    0.0346    1.8681 C   0  0  0  0  0  0  0  0  0  0  0  0
   -1.0167   -0.6016    1.7353 H   0  0  0  0  0  0  0  0  0  0  0  0
   -0.0749    0.2613    2.9381 H   0  0  0  0  0  0  0  0  0  0  0  0
  1  3  1  0  0  0  0
  2  8  1  1  0  0  0
  2  1  1  0  0  0  0
  2  4  1  0  0  0  0
  3  5  1  0  0  0  0
  3 48  1  0  0  0  0
  4 14  1  0  0  0  0
  4  5  2  0  0  0  0
  5 15  1  0  0  0  0
  6 17  1  0  0  0  0
  6  1  1  0  0  0  0
  7 24  1  0  0  0  0
  9  6  1  6  0  0  0
  9 12  1  0  0  0  0
  9 13  1  0  0  0  0
 10 20  1  0  0  0  0
 10  7  1  0  0  0  0
 11 21  1  0  0  0  0
 11  7  1  0  0  0  0
 12 10  2  0  0  0  0
 13 11  2  0  0  0  0
 16  6  1  0  0  0  0
 18  8  1  0  0  0  0
 19  8  1  0  0  0  0
 22 12  1  0  0  0  0
 23 13  1  0  0  0  0
 24 27  1  0  0  0  0
 24 25  1  0  0  0  0
 26 24  1  0  0  0  0
 28 32  1  0  0  0  0
 29 30  2  0  0  0  0
 29 28  1  0  0  0  0
 30 31  1  0  0  0  0
 31 32  1  0  0  0  0
 31 42  1  0  0  0  0
 32 35  1  0  0  0  0
 33 36  1  0  0  0  0
 33 30  1  0  0  0  0
 34 29  1  0  0  0  0
 37 33  1  0  0  0  0
 38 28  1  0  0  0  0
 38 41  1  0  0  0  0
 39 38  1  0  0  0  0
 40 38  1  0  0  0  0
 42 44  1  0  0  0  0
 43 42  1  0  0  0  0
 45 46  1  1  0  0  0
 45 42  1  0  0  0  0
 45 48  1  0  0  0  0
 46 47  1  0  0  0  0
 48 50  1  0  0  0  0
 49 48  1  0  0  0  0
M  RAD  2  45   2  46   2
M  END
>  <energy_and_gap>
-15.153  9.167

$$$$
BEA_40/Syn031540/Syn031540.car
 OpenBabel12061810373D

 49 52  0  0  1  0  0  0  0  0999 V2000
   -1.9022   -1.6290   -0.1095 C   0  0  1  0  0  0  0  0  0  0  0  0
   -1.5691   -0.3478   -0.0526 N   0  0  0  0  0  0  0  0  0  0  0  0
   -2.7123    0.2972    0.0098 C   0  0  0  0  0  0  0  0  0  0  0  0
   -3.7352   -0.6327   -0.0118 C   0  0  0  0  0  0  0  0  0  0  0  0
   -3.2029   -1.8176   -0.0861 N   0  0  0  0  0  0  0  0  0  0  0  0
   -2.9818    1.6728    0.0873 C   0  0  0  0  0  0  0  0  0  0  0  0
   -4.3401    2.0694    0.1424 C   0  0  0  0  0  0  0  0  0  0  0  0
   -5.3767    1.1102    0.1196 C   0  0  0  0  0  0  0  0  0  0  0  0
   -5.0840   -0.2640    0.0416 C   0  0  0  0  0  0  0  0  0  0  0  0
   -4.6627    3.4400    0.2210 N   0  0  0  0  0  0  0  0  0  0  0  0
   -1.0030   -2.6789   -0.1861 N   0  0  0  0  0  0  0  0  0  0  0  0
   -2.1964    2.4203    0.1058 H   0  0  0  0  0  0  0  0  0  0  0  0
   -6.4166    1.4203    0.1620 H   0  0  0  0  0  0  0  0  0  0  0  0
   -5.8914   -0.9878    0.0250 H   0  0  0  0  0  0  0  0  0  0  0  0
   -3.9320    4.1465    0.2387 H   0  0  0  0  0  0  0  0  0  0  0  0
   -5.6324    3.7430    0.2613 H   0  0  0  0  0  0  0  0  0  0  0  0
   -1.3217   -3.6408   -0.2297 H   0  0  0  0  0  0  0  0  0  0  0  0
   -0.0025   -2.5313   -0.1989 H   0  0  0  0  0  0  0  0  0  0  0  0
   -3.8991   -3.1104   -0.1344 C   0  0  0  0  0  0  0  0  0  0  0  0
   -3.5826   -3.7059    0.7283 H   0  0  0  0  0  0  0  0  0  0  0  0
   -4.9821   -2.9691   -0.0979 H   0  0  0  0  0  0  0  0  0  0  0  0
   -3.6308   -3.6126   -1.0697 H   0  0  0  0  0  0  0  0  0  0  0  0
    5.1299    1.0098   -0.1156 N   0  0  0  0  0  0  0  0  0  0  0  0
    4.2744   -0.0039   -0.1576 C   0  0  2  0  0  0  0  0  0  0  0  0
    3.0134    0.4256   -0.1259 N   0  0  0  0  0  0  0  0  0  0  0  0
    4.4128    2.1495   -0.0612 C   0  0  0  0  0  0  0  0  0  0  0  0
    3.0624    1.7798   -0.0662 C   0  0  0  0  0  0  0  0  0  0  0  0
    4.6296   -2.0796    1.0854 N   0  0  0  0  0  0  0  0  0  0  0  0
    4.6941   -1.4344   -0.2225 C   0  0  0  0  0  0  0  0  0  0  0  0
    4.9548    3.0848   -0.0238 H   0  0  0  0  0  0  0  0  0  0  0  0
    2.1257    2.3185   -0.0326 H   0  0  0  0  0  0  0  0  0  0  0  0
    4.8772   -3.0648    0.9937 H   0  0  0  0  0  0  0  0  0  0  0  0
    5.3253   -1.6768    1.7142 H   0  0  0  0  0  0  0  0  0  0  0  0
    4.0531   -1.9695   -0.9291 H   0  0  0  0  0  0  0  0  0  0  0  0
    5.7106   -1.5158   -0.6198 H   0  0  0  0  0  0  0  0  0  0  0  0
    6.5925    0.9903   -0.1234 C   0  0  0  0  0  0  0  0  0  0  0  0
    6.9794    2.0000    0.0487 H   0  0  0  0  0  0  0  0  0  0  0  0
    6.9346    0.3248    0.6755 H   0  0  0  0  0  0  0  0  0  0  0  0
    6.9244    0.6243   -1.1003 H   0  0  0  0  0  0  0  0  0  0  0  0
   -0.2603    0.3583   -0.0506 C   0  0  2  0  0  0  0  0  0  0  0  0
   -0.4017    1.4401    0.0074 H   0  0  0  0  0  0  0  0  0  0  0  0
    0.7223    0.0136   -1.1897 C   0  0  0  0  0  0  0  0  0  0  0  0
    0.9945    0.8787   -1.8026 H   0  0  0  0  0  0  0  0  0  0  0  0
    0.4015   -0.8182   -1.8239 H   0  0  0  0  0  0  0  0  0  0  0  0
    1.7824   -0.3916   -0.1400 C   0  0  2  0  0  0  0  0  0  0  0  0
    2.0356   -1.4538   -0.1990 H   0  0  0  0  0  0  0  0  0  0  0  0
    0.7774   -0.0966    0.9970 C   0  0  0  0  0  0  0  0  0  0  0  0
    0.4870   -0.9886    1.5601 H   0  0  0  0  0  0  0  0  0  0  0  0
    1.0823    0.7035    1.6789 H   0  0  0  0  0  0  0  0  0  0  0  0
  1 11  1  6  0  0  0
  1  5  1  0  0  0  0
  1  2  1  0  0  0  0
  2 40  1  0  0  0  0
  2  3  1  0  0  0  0
  3  6  1  0  0  0  0
  4  3  2  0  0  0  0
  4  9  1  0  0  0  0
  5  4  1  0  0  0  0
  6 12  1  0  0  0  0
  6  7  2  0  0  0  0
  7 10  1  0  0  0  0
  8  7  1  0  0  0  0
  8 13  1  0  0  0  0
  9  8  2  0  0  0  0
 10 15  1  0  0  0  0
 10 16  1  0  0  0  0
 14  9  1  0  0  0  0
 17 11  1  0  0  0  0
 18 11  1  0  0  0  0
 19 21  1  0  0  0  0
 19  5  1  0  0  0  0
 19 20  1  0  0  0  0
 22 19  1  0  0  0  0
 23 26  1  0  0  0  0
 24 29  1  1  0  0  0
 24 25  1  0  0  0  0
 24 23  1  0  0  0  0
 25 27  1  0  0  0  0
 26 30  1  0  0  0  0
 27 26  2  0  0  0  0
 27 31  1  0  0  0  0
 28 33  1  0  0  0  0
 29 28  1  0  0  0  0
 32 28  1  0  0  0  0
 34 29  1  0  0  0  0
 35 29  1  0  0  0  0
 36 23  1  0  0  0  0
 36 37  1  0  0  0  0
 36 38  1  0  0  0  0
 39 36  1  0  0  0  0
 40 41  1  1  0  0  0
 40 47  1  0  0  0  0
 42 45  1  0  0  0  0
 42 40  1  0  0  0  0
 43 42  1  0  0  0  0
 44 42  1  0  0  0  0
 45 46  1  6  0  0  0
 45 25  1  0  0  0  0
 45 47  1  0  0  0  0
 47 48  1  0  0  0  0
 47 49  1  0  0  0  0
M  END
>  <energy_and_gap>
-15.179  6.150

$$$$
BEA_40/Syn023629/Syn023629.car
 OpenBabel12061810373D

 50 54  0  0  1  0  0  0  0  0999 V2000
   -0.3187    2.8392    0.0488 N   0  0  0  0  0  0  0  0  0  0  0  0
   -1.1075    1.7014    0.0057 C   0  0  1  0  0  0  0  0  0  0  0  0
   -0.6258    0.4636   -0.0033 N   0  0  0  0  0  0  0  0  0  0  0  0
   -1.7043   -0.3791   -0.0315 C   0  0  0  0  0  0  0  0  0  0  0  0
   -1.7609   -1.7731   -0.0692 C   0  0  0  0  0  0  0  0  0  0  0  0
   -3.0411   -2.3527   -0.0760 C   0  0  0  0  0  0  0  0  0  0  0  0
   -4.2229   -1.5724   -0.0310 C   0  0  0  0  0  0  0  0  0  0  0  0
   -5.4787   -2.2290   -0.0234 C   0  0  0  0  0  0  0  0  0  0  0  0
   -6.6713   -1.4895    0.0371 C   0  0  0  0  0  0  0  0  0  0  0  0
   -6.6291   -0.0880    0.0961 C   0  0  0  0  0  0  0  0  0  0  0  0
   -5.3966    0.5893    0.0872 C   0  0  0  0  0  0  0  0  0  0  0  0
   -4.1751   -0.1354    0.0128 C   0  0  0  0  0  0  0  0  0  0  0  0
   -2.8819    0.4342   -0.0089 C   0  0  0  0  0  0  0  0  0  0  0  0
   -2.4337    1.7280   -0.0234 N   0  0  0  0  0  0  0  0  0  0  0  0
   -0.7068    3.7524    0.2553 H   0  0  0  0  0  0  0  0  0  0  0  0
    0.6817    2.8037   -0.0961 H   0  0  0  0  0  0  0  0  0  0  0  0
   -0.8839   -2.4089   -0.0966 H   0  0  0  0  0  0  0  0  0  0  0  0
   -3.1067   -3.4366   -0.1082 H   0  0  0  0  0  0  0  0  0  0  0  0
   -7.6270   -2.0029    0.0444 H   0  0  0  0  0  0  0  0  0  0  0  0
   -7.5542    0.4761    0.1517 H   0  0  0  0  0  0  0  0  0  0  0  0
   -5.4296    1.6677    0.1502 H   0  0  0  0  0  0  0  0  0  0  0  0
   -3.2636    2.9381   -0.0940 C   0  0  0  0  0  0  0  0  0  0  0  0
   -2.6608    3.8229   -0.3060 H   0  0  0  0  0  0  0  0  0  0  0  0
   -3.9733    2.8249   -0.9186 H   0  0  0  0  0  0  0  0  0  0  0  0
   -3.7739    3.0635    0.8662 H   0  0  0  0  0  0  0  0  0  0  0  0
   -5.5405   -3.3128   -0.0600 H   0  0  0  0  0  0  0  0  0  0  0  0
    3.9910    0.1773   -0.0044 N   0  0  0  0  0  0  0  0  0  0  0  0
    4.2863   -1.1443    0.0346 C   0  0  0  0  0  0  0  0  0  0  0  0
    5.6902   -1.2350    0.0329 C   0  0  0  0  0  0  0  0  0  0  0  0
    6.1880    0.0180   -0.0065 N   0  0  0  0  0  0  0  0  0  0  0  0
    5.1441    0.8242   -0.0276 C   0  0  0  0  0  0  0  0  0  0  0  0
    6.4254   -2.3990    0.0658 N   0  0  0  0  0  0  0  0  0  0  0  0
    3.4567   -1.8381    0.0583 H   0  0  0  0  0  0  0  0  0  0  0  0
    5.2294    1.9034   -0.0604 H   0  0  0  0  0  0  0  0  0  0  0  0
    5.9737   -3.3089    0.0947 H   0  0  0  0  0  0  0  0  0  0  0  0
    7.4403   -2.3716    0.0617 H   0  0  0  0  0  0  0  0  0  0  0  0
    7.5812    0.4546   -0.0241 C   0  0  0  0  0  0  0  0  0  0  0  0
    8.0665    0.0881    0.8861 H   0  0  0  0  0  0  0  0  0  0  0  0
    7.6236    1.5482   -0.0573 H   0  0  0  0  0  0  0  0  0  0  0  0
    8.0608    0.0336   -0.9135 H   0  0  0  0  0  0  0  0  0  0  0  0
    0.7565   -0.0832    0.0191 C   0  0  2  0  0  0  0  0  0  0  0  0
    0.7428   -1.1744    0.0632 H   0  0  0  0  0  0  0  0  0  0  0  0
    1.7197    0.4663    1.0920 C   0  0  0  0  0  0  0  0  0  0  0  0
    2.1018   -0.3078    1.7654 H   0  0  0  0  0  0  0  0  0  0  0  0
    1.3247    1.3099    1.6652 H   0  0  0  0  0  0  0  0  0  0  0  0
    2.7040    0.8885   -0.0217 C   0  0  2  0  0  0  0  0  0  0  0  0
    2.8728    1.9710   -0.0582 H   0  0  0  0  0  0  0  0  0  0  0  0
    1.7090    0.3945   -1.0958 C   0  0  0  0  0  0  0  0  0  0  0  0
    1.3045    1.2013   -1.7144 H   0  0  0  0  0  0  0  0  0  0  0  0
    2.0831   -0.4207   -1.7234 H   0  0  0  0  0  0  0  0  0  0  0  0
  1 15  1  0  0  0  0
  2  1  1  1  0  0  0
  3  2  1  0  0  0  0
  3 41  1  0  0  0  0
  4 13  1  0  0  0  0
  4  3  1  0  0  0  0
  5  4  2  0  0  0  0
  6  5  1  0  0  0  0
  6  7  1  0  0  0  0
  7  8  2  0  0  0  0
  7 12  1  0  0  0  0
  8  9  1  0  0  0  0
  9 19  1  0  0  0  0
  9 10  2  0  0  0  0
 10 20  1  0  0  0  0
 11 10  1  0  0  0  0
 11 21  1  0  0  0  0
 12 11  1  0  0  0  0
 13 12  2  0  0  0  0
 14 13  1  0  0  0  0
 14  2  1  0  0  0  0
 16  1  1  0  0  0  0
 17  5  1  0  0  0  0
 18  6  1  0  0  0  0
 22 14  1  0  0  0  0
 22 25  1  0  0  0  0
 23 22  1  0  0  0  0
 24 22  1  0  0  0  0
 26  8  1  0  0  0  0
 27 28  1  0  0  0  0
 28 33  1  0  0  0  0
 29 28  2  0  0  0  0
 29 32  1  0  0  0  0
 30 29  1  0  0  0  0
 31 30  1  0  0  0  0
 31 27  1  0  0  0  0
 32 35  1  0  0  0  0
 34 31  1  0  0  0  0
 36 32  1  0  0  0  0
 37 30  1  0  0  0  0
 37 38  1  0  0  0  0
 39 37  1  0  0  0  0
 40 37  1  0  0  0  0
 41 42  1  1  0  0  0
 41 43  1  0  0  0  0
 43 45  1  0  0  0  0
 43 44  1  0  0  0  0
 46 47  1  6  0  0  0
 46 27  1  0  0  0  0
 46 43  1  0  0  0  0
 48 46  1  0  0  0  0
 48 41  1  0  0  0  0
 49 48  1  0  0  0  0
 50 48  1  0  0  0  0
M  END
>  <energy_and_gap>
-15.067  6.128

$$$$
BEA_40/Syn028766/Syn028766.car
 OpenBabel12061810373D

 50 53  0  0  1  0  0  0  0  0999 V2000
   -2.6773   -1.2242    0.1689 C   0  0  1  0  0  0  0  0  0  0  0  0
   -1.6473   -1.0213    0.9646 N   0  0  0  0  0  0  0  0  0  0  0  0
   -1.4874    0.2751    1.0095 C   0  0  0  0  0  0  0  0  0  0  0  0
   -2.4434    0.8522    0.1975 C   0  0  0  0  0  0  0  0  0  0  0  0
   -3.1717   -0.1034   -0.3086 N   0  0  0  0  0  0  0  0  0  0  0  0
   -0.5449    1.0408    1.7059 C   0  0  0  0  0  0  0  0  0  0  0  0
   -0.5980    2.4438    1.5244 C   0  0  0  0  0  0  0  0  0  0  0  0
   -1.5759    3.0312    0.6881 C   0  0  0  0  0  0  0  0  0  0  0  0
   -2.5226    2.2360    0.0120 C   0  0  0  0  0  0  0  0  0  0  0  0
    0.3387    3.2651    2.1847 N   0  0  0  0  0  0  0  0  0  0  0  0
   -3.1687   -2.4770   -0.1558 N   0  0  0  0  0  0  0  0  0  0  0  0
    0.2035    0.5899    2.3494 H   0  0  0  0  0  0  0  0  0  0  0  0
   -1.6117    4.1084    0.5553 H   0  0  0  0  0  0  0  0  0  0  0  0
   -3.2664    2.7007   -0.6260 H   0  0  0  0  0  0  0  0  0  0  0  0
    0.3158    4.2749    2.0676 H   0  0  0  0  0  0  0  0  0  0  0  0
    1.0497    2.8623    2.7894 H   0  0  0  0  0  0  0  0  0  0  0  0
   -2.7588   -3.3250    0.2203 H   0  0  0  0  0  0  0  0  0  0  0  0
   -3.9599   -2.5847   -0.7820 H   0  0  0  0  0  0  0  0  0  0  0  0
   -4.3101    0.0225   -1.2268 C   0  0  0  0  0  0  0  0  0  0  0  0
   -5.1798   -0.4606   -0.7695 H   0  0  0  0  0  0  0  0  0  0  0  0
   -4.0471   -0.4679   -2.1698 H   0  0  0  0  0  0  0  0  0  0  0  0
   -4.5394    1.0748   -1.4129 H   0  0  0  0  0  0  0  0  0  0  0  0
    0.9435    1.0114   -3.6993 N   0  0  0  0  0  0  0  0  0  0  0  0
    1.5194    0.5944   -2.4761 C   0  0  0  0  0  0  0  0  0  0  0  0
    2.6903    1.2603   -2.0410 C   0  0  0  0  0  0  0  0  0  0  0  0
    3.3464    0.8897   -0.8550 C   0  0  0  0  0  0  0  0  0  0  0  0
    2.7776   -0.1452   -0.1152 C   0  0  0  0  0  0  0  0  0  0  0  0
    3.1720   -0.6485    1.0118 N   0  0  0  0  0  0  0  0  0  0  0  0
    2.3067   -1.5684    1.3353 C   0  0  0  0  0  0  0  0  0  0  0  0
    1.3489   -1.6716    0.4405 N   0  0  0  0  0  0  0  0  0  0  0  0
    1.6282   -0.8061   -0.5034 C   0  0  0  0  0  0  0  0  0  0  0  0
    0.9641   -0.4807   -1.7054 C   0  0  0  0  0  0  0  0  0  0  0  0
   -0.1857   -1.1753   -2.1423 N   0  0  0  0  0  0  0  0  0  0  0  0
    1.3307    1.8032   -4.2059 H   0  0  0  0  0  0  0  0  0  0  0  0
    0.1622    0.5206   -4.1219 H   0  0  0  0  0  0  0  0  0  0  0  0
    3.1127    2.0694   -2.6294 H   0  0  0  0  0  0  0  0  0  0  0  0
    4.2469    1.4050   -0.5367 H   0  0  0  0  0  0  0  0  0  0  0  0
    2.3720   -2.1577    2.2431 H   0  0  0  0  0  0  0  0  0  0  0  0
   -0.2730   -2.1746   -1.9980 H   0  0  0  0  0  0  0  0  0  0  0  0
   -0.8926   -0.7143   -2.7077 H   0  0  0  0  0  0  0  0  0  0  0  0
    4.3328   -0.3000    1.8311 C   0  0  0  0  0  0  0  0  0  0  0  0
    4.2228    0.7390    2.1590 H   0  0  0  0  0  0  0  0  0  0  0  0
    5.2343   -0.4177    1.2208 H   0  0  0  0  0  0  0  0  0  0  0  0
    4.3855   -0.9625    2.7016 H   0  0  0  0  0  0  0  0  0  0  0  0
   -0.1231   -3.0292   -0.1571 H   0  0  0  0  0  0  0  0  0  0  0  0
    0.2839   -2.6334    0.7736 C   0  0  0  0  0  0  0  0  0  0  0  0
    0.7445   -3.4856    1.2872 H   0  0  0  0  0  0  0  0  0  0  0  0
   -0.8262   -2.0289    1.6606 C   0  0  0  0  0  0  0  0  0  0  0  0
   -1.5021   -2.8178    2.0052 H   0  0  0  0  0  0  0  0  0  0  0  0
   -0.4075   -1.5717    2.5625 H   0  0  0  0  0  0  0  0  0  0  0  0
  1 11  1  6  0  0  0
  1  2  1  0  0  0  0
  2  3  1  0  0  0  0
  2 48  1  0  0  0  0
  3  6  1  0  0  0  0
  4  3  2  0  0  0  0
  5  1  1  0  0  0  0
  5  4  1  0  0  0  0
  6 12  1  0  0  0  0
  7  6  2  0  0  0  0
  7 10  1  0  0  0  0
  8  7  1  0  0  0  0
  9  4  1  0  0  0  0
  9  8  2  0  0  0  0
 10 16  1  0  0  0  0
 11 17  1  0  0  0  0
 13  8  1  0  0  0  0
 14  9  1  0  0  0  0
 15 10  1  0  0  0  0
 18 11  1  0  0  0  0
 19 20  1  0  0  0  0
 19  5  1  0  0  0  0
 21 19  1  0  0  0  0
 22 19  1  0  0  0  0
 23 24  1  0  0  0  0
 24 25  1  0  0  0  0
 24 32  2  0  0  0  0
 25 26  2  0  0  0  0
 26 37  1  0  0  0  0
 26 27  1  0  0  0  0
 27 28  1  0  0  0  0
 28 29  1  0  0  0  0
 28 41  1  0  0  0  0
 29 38  1  0  0  0  0
 30 46  1  0  0  0  0
 30 29  1  0  0  0  0
 31 27  2  0  0  0  0
 31 30  1  0  0  0  0
 32 31  1  0  0  0  0
 33 39  1  0  0  0  0
 33 32  1  0  0  0  0
 34 23  1  0  0  0  0
 35 23  1  0  0  0  0
 36 25  1  0  0  0  0
 40 33  1  0  0  0  0
 41 42  1  0  0  0  0
 41 44  1  0  0  0  0
 43 41  1  0  0  0  0
 45 46  1  0  0  0  0
 46 47  1  0  0  0  0
 46 48  1  0  0  0  0
 48 49  1  0  0  0  0
 48 50  1  0  0  0  0
M  END
>  <energy_and_gap>
-15.042  5.957

$$$$
BEA_40/Syn066404/Syn066404.car
 OpenBabel12061810373D

 55 57  0  0  1  0  0  0  0  0999 V2000
   -1.5765    2.2005   -2.0736 N   0  0  0  0  0  0  0  0  0  0  0  0
   -2.1492    1.1757   -1.3397 C   0  0  1  0  0  0  0  0  0  0  0  0
   -1.5241    0.0406   -1.0685 N   0  0  0  0  0  0  0  0  0  0  0  0
   -2.3730   -0.7280   -0.3391 C   0  0  0  0  0  0  0  0  0  0  0  0
   -2.2080   -1.9964    0.2073 C   0  0  0  0  0  0  0  0  0  0  0  0
   -3.3418   -2.4664    0.9061 C   0  0  0  0  0  0  0  0  0  0  0  0
   -3.3137   -3.7362    1.5180 N   0  0  0  0  0  0  0  0  0  0  0  0
   -4.5075   -1.6589    0.9863 C   0  0  0  0  0  0  0  0  0  0  0  0
   -4.6841   -0.4063    0.4417 N   0  0  0  0  0  0  0  0  0  0  0  0
   -3.5858    0.0105   -0.1920 C   0  0  0  0  0  0  0  0  0  0  0  0
   -3.3732    1.2071   -0.8243 N   0  0  0  0  0  0  0  0  0  0  0  0
   -0.5921    2.1844   -2.3177 H   0  0  0  0  0  0  0  0  0  0  0  0
   -2.1142    2.9968   -2.3976 H   0  0  0  0  0  0  0  0  0  0  0  0
   -1.2931   -2.5724    0.1105 H   0  0  0  0  0  0  0  0  0  0  0  0
   -4.1227   -4.0885    2.0234 H   0  0  0  0  0  0  0  0  0  0  0  0
   -2.4834   -4.3207    1.4640 H   0  0  0  0  0  0  0  0  0  0  0  0
   -5.3614   -2.0552    1.5303 H   0  0  0  0  0  0  0  0  0  0  0  0
   -5.9936    0.2213    0.6444 C   0  0  0  0  0  0  0  0  0  0  0  0
   -5.8758    1.0333    1.3685 H   0  0  0  0  0  0  0  0  0  0  0  0
   -6.3523    0.5991   -0.3170 H   0  0  0  0  0  0  0  0  0  0  0  0
   -6.7198   -0.5051    1.0234 H   0  0  0  0  0  0  0  0  0  0  0  0
   -4.3160    2.3293   -0.9061 C   0  0  0  0  0  0  0  0  0  0  0  0
   -3.8092    3.2418   -1.2270 H   0  0  0  0  0  0  0  0  0  0  0  0
   -5.0998    2.0686   -1.6239 H   0  0  0  0  0  0  0  0  0  0  0  0
   -4.7314    2.5155    0.0873 H   0  0  0  0  0  0  0  0  0  0  0  0
    4.2137   -0.9489    0.3041 C   0  0  1  0  0  0  0  0  0  0  0  0
    5.2408   -1.0296   -0.5266 N   0  0  0  0  0  0  0  0  0  0  0  0
    4.7498   -1.3776   -1.7349 C   0  0  0  0  0  0  0  0  0  0  0  0
    3.3595   -1.5067   -1.5897 C   0  0  0  0  0  0  0  0  0  0  0  0
    3.0648   -1.2240   -0.2985 N   0  0  0  0  0  0  0  0  0  0  0  0
    4.3380   -0.6239    1.6396 N   0  0  0  0  0  0  0  0  0  0  0  0
    5.4535   -1.4929   -2.5480 H   0  0  0  0  0  0  0  0  0  0  0  0
    2.5409   -1.7656   -2.2473 H   0  0  0  0  0  0  0  0  0  0  0  0
    5.2485   -0.4481    2.0516 H   0  0  0  0  0  0  0  0  0  0  0  0
    3.5230   -0.5288    2.2357 H   0  0  0  0  0  0  0  0  0  0  0  0
    6.6626   -0.8034   -0.2682 C   0  0  0  0  0  0  0  0  0  0  0  0
    6.9935   -1.5253    0.4852 H   0  0  0  0  0  0  0  0  0  0  0  0
    6.7864    0.2209    0.0976 H   0  0  0  0  0  0  0  0  0  0  0  0
    7.2347   -0.9399   -1.1916 H   0  0  0  0  0  0  0  0  0  0  0  0
    1.1023    3.6984    0.7201 N   0  0  0  0  0  0  0  0  0  0  0  0
    0.4609    3.5443   -0.0520 H   0  0  0  0  0  0  0  0  0  0  0  0
    1.1900    4.6690    1.0091 H   0  0  0  0  0  0  0  0  0  0  0  0
    1.8064    2.6662    1.3315 C   0  0  0  0  0  0  0  0  0  0  0  0
    2.6405    3.0429    2.3647 N   0  0  0  0  0  0  0  0  0  0  0  0
    3.1978    2.3626    2.8741 H   0  0  0  0  0  0  0  0  0  0  0  0
    2.7457    4.0060    2.6726 H   0  0  0  0  0  0  0  0  0  0  0  0
    1.7327    1.3273    0.9853 N   0  0  0  0  0  0  0  0  0  0  0  0
    0.9534    1.0930    0.0511 N   0  0  0  0  0  0  0  0  0  0  0  0
    0.8327   -0.1321   -0.3477 C   0  0  0  0  0  0  0  0  0  0  0  0
    1.6765   -1.2776    0.1813 C   0  0  0  0  0  0  0  0  0  0  0  0
    1.2686   -2.2461   -0.1286 H   0  0  0  0  0  0  0  0  0  0  0  0
    1.6845   -1.2919    1.2757 H   0  0  0  0  0  0  0  0  0  0  0  0
   -0.1655   -0.3898   -1.4434 C   0  0  0  0  0  0  0  0  0  0  0  0
    0.1267    0.1284   -2.3622 H   0  0  0  0  0  0  0  0  0  0  0  0
   -0.2143   -1.4525   -1.7031 H   0  0  0  0  0  0  0  0  0  0  0  0
  2  1  1  1  0  0  0
  2  3  1  0  0  0  0
  2 11  1  0  0  0  0
  3  4  1  0  0  0  0
  4 10  2  0  0  0  0
  4  5  1  0  0  0  0
  5  6  1  0  0  0  0
  6  8  2  0  0  0  0
  6  7  1  0  0  0  0
  7 15  1  0  0  0  0
  8 17  1  0  0  0  0
  9 18  1  0  0  0  0
  9  8  1  0  0  0  0
 10  9  1  0  0  0  0
 11 10  1  0  0  0  0
 12  1  1  0  0  0  0
 13  1  1  0  0  0  0
 14  5  1  0  0  0  0
 16  7  1  0  0  0  0
 18 21  1  0  0  0  0
 18 19  1  0  0  0  0
 20 18  1  0  0  0  0
 22 11  1  0  0  0  0
 22 25  1  0  0  0  0
 23 22  1  0  0  0  0
 24 22  1  0  0  0  0
 26 31  1  1  0  0  0
 27 36  1  0  0  0  0
 27 26  1  0  0  0  0
 28 29  2  0  0  0  0
 28 27  1  0  0  0  0
 29 30  1  0  0  0  0
 30 50  1  0  0  0  0
 30 26  1  0  0  0  0
 31 34  1  0  0  0  0
 31 35  1  0  0  0  0
 32 28  1  0  0  0  0
 33 29  1  0  0  0  0
 36 38  1  0  0  0  0
 36 37  1  0  0  0  0
 39 36  1  0  0  0  0
 40 42  1  0  0  0  0
 40 43  2  0  0  0  0
 41 40  1  0  0  0  0
 43 44  1  0  0  0  0
 44 46  1  0  0  0  0
 44 45  1  0  0  0  0
 47 43  1  0  0  0  0
 48 47  1  0  0  0  0
 49 48  2  0  0  0  0
 49 50  1  0  0  0  0
 50 52  1  0  0  0  0
 51 50  1  0  0  0  0
 53  3  1  0  0  0  0
 53 49  1  0  0  0  0
 54 53  1  0  0  0  0
 55 53  1  0  0  0  0
M  RAD  1  47   2
M  END
>  <energy_and_gap>
-15.685  5.200

$$$$
BEA_40/Syn049496/Syn049496.car
 OpenBabel12061810373D

 54 56  0  0  1  0  0  0  0  0999 V2000
    3.7394    1.9495   -0.1416 N   0  0  0  0  0  0  0  0  0  0  0  0
    4.6468    0.8955    0.1253 C   0  0  0  0  0  0  0  0  0  0  0  0
    4.2263   -0.4722    0.2378 C   0  0  0  0  0  0  0  0  0  0  0  0
    5.2099   -1.4646    0.4867 C   0  0  0  0  0  0  0  0  0  0  0  0
    6.5671   -1.1217    0.6182 C   0  0  0  0  0  0  0  0  0  0  0  0
    6.9698    0.2187    0.5094 C   0  0  0  0  0  0  0  0  0  0  0  0
    6.0181    1.2231    0.2655 C   0  0  0  0  0  0  0  0  0  0  0  0
    1.0875   -1.8655   -0.6627 C   0  0  0  0  0  0  0  0  0  0  0  0
    2.3851   -1.7120   -0.8391 N   0  0  0  0  0  0  0  0  0  0  0  0
    2.8259   -0.8764    0.1408 C   0  0  0  0  0  0  0  0  0  0  0  0
    1.6876   -0.5493    0.9116 C   0  0  0  0  0  0  0  0  0  0  0  0
    0.6306   -1.1818    0.3635 N   0  0  0  0  0  0  0  0  0  0  0  0
    2.7629    1.7788   -0.3612 H   0  0  0  0  0  0  0  0  0  0  0  0
    4.0655    2.9122   -0.1631 H   0  0  0  0  0  0  0  0  0  0  0  0
    4.9279   -2.5083    0.5875 H   0  0  0  0  0  0  0  0  0  0  0  0
    7.3048   -1.8941    0.8085 H   0  0  0  0  0  0  0  0  0  0  0  0
    8.0177    0.4793    0.6130 H   0  0  0  0  0  0  0  0  0  0  0  0
    6.3555    2.2518    0.1815 H   0  0  0  0  0  0  0  0  0  0  0  0
    0.4559   -2.4769   -1.2953 H   0  0  0  0  0  0  0  0  0  0  0  0
    1.4935    0.0680    1.7785 H   0  0  0  0  0  0  0  0  0  0  0  0
    3.0755   -2.3733   -1.9466 C   0  0  0  0  0  0  0  0  0  0  0  0
    3.8292   -1.6894   -2.3493 H   0  0  0  0  0  0  0  0  0  0  0  0
    3.5478   -3.2818   -1.5599 H   0  0  0  0  0  0  0  0  0  0  0  0
    2.3572   -2.6243   -2.7345 H   0  0  0  0  0  0  0  0  0  0  0  0
   -4.9730   -0.1705   -0.2773 C   0  0  2  0  0  0  0  0  0  0  0  0
   -5.9797   -0.5157    0.5092 N   0  0  0  0  0  0  0  0  0  0  0  0
   -5.6457   -1.6874    1.0916 C   0  0  0  0  0  0  0  0  0  0  0  0
   -4.3731   -2.0357    0.6108 C   0  0  0  0  0  0  0  0  0  0  0  0
   -3.9896   -1.0586   -0.2431 N   0  0  0  0  0  0  0  0  0  0  0  0
   -4.9550    0.9801   -1.0388 N   0  0  0  0  0  0  0  0  0  0  0  0
   -6.3574   -2.1273    1.7770 H   0  0  0  0  0  0  0  0  0  0  0  0
   -3.6900   -2.8587    0.7708 H   0  0  0  0  0  0  0  0  0  0  0  0
   -4.1494    1.2196   -1.6067 H   0  0  0  0  0  0  0  0  0  0  0  0
   -5.7417    1.6212   -1.0361 H   0  0  0  0  0  0  0  0  0  0  0  0
   -7.2419    0.1802    0.7571 C   0  0  0  0  0  0  0  0  0  0  0  0
   -7.7760    0.2718   -0.1941 H   0  0  0  0  0  0  0  0  0  0  0  0
   -7.0139    1.1685    1.1689 H   0  0  0  0  0  0  0  0  0  0  0  0
   -7.8466   -0.3896    1.4702 H   0  0  0  0  0  0  0  0  0  0  0  0
    0.1939    3.7348    0.6148 N   0  0  0  0  0  0  0  0  0  0  0  0
    0.8199    3.3739    1.3293 H   0  0  0  0  0  0  0  0  0  0  0  0
    0.2712    4.7325    0.4355 H   0  0  0  0  0  0  0  0  0  0  0  0
   -0.6928    2.9138   -0.0524 C   0  0  0  0  0  0  0  0  0  0  0  0
   -1.4908    3.5385   -1.0050 N   0  0  0  0  0  0  0  0  0  0  0  0
   -1.4330    4.5339   -1.2030 H   0  0  0  0  0  0  0  0  0  0  0  0
   -2.1782    3.0370   -1.5595 H   0  0  0  0  0  0  0  0  0  0  0  0
   -0.7230    1.5656    0.2623 N   0  0  0  0  0  0  0  0  0  0  0  0
   -1.5527    0.9161   -0.3914 N   0  0  0  0  0  0  0  0  0  0  0  0
   -1.6378   -0.3569   -0.1744 C   0  0  0  0  0  0  0  0  0  0  0  0
   -0.7618   -1.1078    0.8099 C   0  0  0  0  0  0  0  0  0  0  0  0
   -1.1052   -2.1397    0.9417 H   0  0  0  0  0  0  0  0  0  0  0  0
   -0.7843   -0.6370    1.7995 H   0  0  0  0  0  0  0  0  0  0  0  0
   -2.6971   -1.0993   -0.9378 C   0  0  0  0  0  0  0  0  0  0  0  0
   -2.4174   -2.1487   -1.0847 H   0  0  0  0  0  0  0  0  0  0  0  0
   -2.8437   -0.6757   -1.9378 H   0  0  0  0  0  0  0  0  0  0  0  0
  1  2  1  0  0  0  0
  2  3  2  0  0  0  0
  2  7  1  0  0  0  0
  3  4  1  0  0  0  0
  4 15  1  0  0  0  0
  4  5  2  0  0  0  0
  5 16  1  0  0  0  0
  6 17  1  0  0  0  0
  6  5  1  0  0  0  0
  7  6  2  0  0  0  0
  8 12  1  0  0  0  0
  9  8  1  0  0  0  0
  9 10  1  0  0  0  0
 10  3  1  0  0  0  0
 10 11  2  0  0  0  0
 11 20  1  0  0  0  0
 12 49  1  0  0  0  0
 12 11  1  0  0  0  0
 13  1  1  0  0  0  0
 14  1  1  0  0  0  0
 18  7  1  0  0  0  0
 19  8  1  0  0  0  0
 21 23  1  0  0  0  0
 21  9  1  0  0  0  0
 22 21  1  0  0  0  0
 24 21  1  0  0  0  0
 25 30  1  1  0  0  0
 25 29  1  0  0  0  0
 25 26  1  0  0  0  0
 26 35  1  0  0  0  0
 26 27  1  0  0  0  0
 27 31  1  0  0  0  0
 28 32  1  0  0  0  0
 28 27  2  0  0  0  0
 29 28  1  0  0  0  0
 30 34  1  0  0  0  0
 33 30  1  0  0  0  0
 35 37  1  0  0  0  0
 35 38  1  0  0  0  0
 36 35  1  0  0  0  0
 39 40  1  0  0  0  0
 41 39  1  0  0  0  0
 42 46  1  0  0  0  0
 42 39  1  0  0  0  0
 43 42  2  0  0  0  0
 44 43  1  0  0  0  0
 45 43  1  0  0  0  0
 47 48  2  0  0  0  0
 47 46  1  0  0  0  0
 48 49  1  0  0  0  0
 49 50  1  0  0  0  0
 49 51  1  0  0  0  0
 52 29  1  0  0  0  0
 52 48  1  0  0  0  0
 53 52  1  0  0  0  0
 54 52  1  0  0  0  0
M  RAD  1  46   2
M  END
>  <energy_and_gap>
-15.579  5.088

$$$$
BEA_40/Syn036824/Syn036824.car
 OpenBabel12061810373D

 50 52  0  0  1  0  0  0  0  0999 V2000
   -3.6435   -0.3379   -0.1352 C   0  0  0  0  0  0  0  0  0  0  0  0
   -2.3905    0.1151   -0.4755 C   0  0  0  0  0  0  0  0  0  0  0  0
   -2.0908    1.4707   -0.4971 C   0  0  0  0  0  0  0  0  0  0  0  0
   -3.1655    2.3147   -0.1794 C   0  0  0  0  0  0  0  0  0  0  0  0
   -4.4309    1.7635    0.1612 C   0  0  2  0  0  0  0  0  0  0  0  0
   -4.7093    0.3992    0.2366 N   0  0  0  0  0  0  0  0  0  0  0  0
   -2.4135   -1.9680   -0.6014 C   0  0  0  0  0  0  0  0  0  0  0  0
   -3.6372   -1.6440   -0.2399 N   0  0  0  0  0  0  0  0  0  0  0  0
   -1.6485   -0.9140   -0.7448 N   0  0  0  0  0  0  0  0  0  0  0  0
   -5.4521    2.7097    0.4171 N   0  0  0  0  0  0  0  0  0  0  0  0
   -1.1149    1.8611   -0.7646 H   0  0  0  0  0  0  0  0  0  0  0  0
   -3.0097    3.3894   -0.2081 H   0  0  0  0  0  0  0  0  0  0  0  0
   -2.0651   -2.9812   -0.7670 H   0  0  0  0  0  0  0  0  0  0  0  0
   -6.4287    2.4382    0.4434 H   0  0  0  0  0  0  0  0  0  0  0  0
   -5.2368    3.7001    0.4990 H   0  0  0  0  0  0  0  0  0  0  0  0
   -5.9966   -0.1490    0.6897 C   0  0  0  0  0  0  0  0  0  0  0  0
   -6.5943   -0.4019   -0.1915 H   0  0  0  0  0  0  0  0  0  0  0  0
   -5.8172   -1.0250    1.3164 H   0  0  0  0  0  0  0  0  0  0  0  0
   -6.5248    0.5736    1.3152 H   0  0  0  0  0  0  0  0  0  0  0  0
   -4.5622   -2.7745   -0.0951 C   0  0  0  0  0  0  0  0  0  0  0  0
   -4.1678   -3.6708   -0.5872 H   0  0  0  0  0  0  0  0  0  0  0  0
   -4.7006   -2.9698    0.9731 H   0  0  0  0  0  0  0  0  0  0  0  0
   -5.5114   -2.5103   -0.5697 H   0  0  0  0  0  0  0  0  0  0  0  0
    3.8806    0.5888    0.5372 N   0  0  0  0  0  0  0  0  0  0  0  0
    4.6732    1.4380   -0.1534 C   0  0  0  0  0  0  0  0  0  0  0  0
    5.8977    0.7675   -0.3344 C   0  0  0  0  0  0  0  0  0  0  0  0
    5.7988   -0.4462    0.2485 N   0  0  0  0  0  0  0  0  0  0  0  0
    4.5824   -0.5089    0.7549 C   0  0  0  0  0  0  0  0  0  0  0  0
    7.0017    1.2633   -0.9913 N   0  0  0  0  0  0  0  0  0  0  0  0
    4.2554    2.3996   -0.4205 H   0  0  0  0  0  0  0  0  0  0  0  0
    4.1970   -1.3670    1.2910 H   0  0  0  0  0  0  0  0  0  0  0  0
    7.8478    0.7085   -1.0750 H   0  0  0  0  0  0  0  0  0  0  0  0
    6.9981    2.1915   -1.4050 H   0  0  0  0  0  0  0  0  0  0  0  0
    6.7937   -1.5113    0.3344 C   0  0  0  0  0  0  0  0  0  0  0  0
    7.6689   -1.1204    0.8631 H   0  0  0  0  0  0  0  0  0  0  0  0
    7.0608   -1.8132   -0.6833 H   0  0  0  0  0  0  0  0  0  0  0  0
    6.3749   -2.3628    0.8806 H   0  0  0  0  0  0  0  0  0  0  0  0
    0.6983   -1.7199    1.1062 C   0  0  0  0  0  0  0  0  0  0  0  0
    0.7816   -2.7353    0.7075 H   0  0  0  0  0  0  0  0  0  0  0  0
    1.5278   -1.5885    1.8033 H   0  0  0  0  0  0  0  0  0  0  0  0
   -0.2307   -1.6504    1.6791 H   0  0  0  0  0  0  0  0  0  0  0  0
    0.7062   -0.7169   -0.0138 C   0  0  0  0  0  0  0  0  0  0  0  0
   -0.2409   -0.9950   -1.1543 C   0  0  0  0  0  0  0  0  0  0  0  0
   -0.1104   -0.2827   -1.9771 H   0  0  0  0  0  0  0  0  0  0  0  0
   -0.0539   -1.9918   -1.5704 H   0  0  0  0  0  0  0  0  0  0  0  0
    1.5237    0.3733   -0.0656 C   0  0  0  0  0  0  0  0  0  0  0  0
    1.4592    1.0207   -0.9342 H   0  0  0  0  0  0  0  0  0  0  0  0
    2.5056    0.8244    0.9734 C   0  0  0  0  0  0  0  0  0  0  0  0
    2.3913    1.8994    1.1492 H   0  0  0  0  0  0  0  0  0  0  0  0
    2.3701    0.3317    1.9405 H   0  0  0  0  0  0  0  0  0  0  0  0
  1  6  1  0  0  0  0
  2  1  2  0  0  0  0
  3  2  1  0  0  0  0
  3  4  2  0  0  0  0
  4  5  1  0  0  0  0
  5  6  1  0  0  0  0
  5 10  1  6  0  0  0
  6 16  1  0  0  0  0
  7  8  1  0  0  0  0
  8  1  1  0  0  0  0
  8 20  1  0  0  0  0
  9  7  1  0  0  0  0
  9  2  1  0  0  0  0
 10 14  1  0  0  0  0
 10 15  1  0  0  0  0
 11  3  1  0  0  0  0
 12  4  1  0  0  0  0
 13  7  1  0  0  0  0
 16 19  1  0  0  0  0
 16 18  1  0  0  0  0
 17 16  1  0  0  0  0
 20 22  1  0  0  0  0
 21 20  1  0  0  0  0
 23 20  1  0  0  0  0
 24 28  1  0  0  0  0
 24 48  1  0  0  0  0
 25 24  1  0  0  0  0
 26 25  2  0  0  0  0
 26 27  1  0  0  0  0
 27 34  1  0  0  0  0
 27 28  1  0  0  0  0
 28 31  1  0  0  0  0
 29 26  1  0  0  0  0
 30 25  1  0  0  0  0
 32 29  1  0  0  0  0
 33 29  1  0  0  0  0
 34 35  1  0  0  0  0
 34 37  1  0  0  0  0
 36 34  1  0  0  0  0
 38 41  1  0  0  0  0
 38 40  1  0  0  0  0
 39 38  1  0  0  0  0
 42 38  1  0  0  0  0
 43  9  1  0  0  0  0
 43 42  1  0  0  0  0
 44 43  1  0  0  0  0
 45 43  1  0  0  0  0
 46 42  2  0  0  0  0
 46 48  1  0  0  0  0
 47 46  1  0  0  0  0
 48 49  1  0  0  0  0
 48 50  1  0  0  0  0
M  END
>  <energy_and_gap>
-15.460  4.883

$$$$
BEA_40/Syn063836/Syn063836.car
 OpenBabel12061810373D

 47 50  0  0  1  0  0  0  0  0999 V2000
   -2.3972   -0.2019    0.1319 C   0  0  2  0  0  0  0  0  0  0  0  0
   -1.2705    0.5515    0.3492 N   0  0  1  0  0  0  0  0  0  0  0  0
   -1.6556    1.8146    0.3470 C   0  0  0  0  0  0  0  0  0  0  0  0
   -3.4751    0.7270    0.0357 C   0  0  0  0  0  0  0  0  0  0  0  0
   -2.9463    1.9606    0.1690 N   0  0  0  0  0  0  0  0  0  0  0  0
   -2.6410   -1.5784    0.0047 C   0  0  0  0  0  0  0  0  0  0  0  0
   -5.0451   -1.0103   -0.2710 N   0  0  0  0  0  0  0  0  0  0  0  0
   -1.6669   -2.5977    0.0385 N   0  0  0  0  0  0  0  0  0  0  0  0
   -4.7927    0.3285   -0.1642 C   0  0  0  0  0  0  0  0  0  0  0  0
   -4.0101   -1.9027   -0.1910 C   0  0  0  0  0  0  0  0  0  0  0  0
   -1.0007    2.6657    0.4738 H   0  0  0  0  0  0  0  0  0  0  0  0
   -1.9490   -3.5739    0.0055 H   0  0  0  0  0  0  0  0  0  0  0  0
   -0.6750   -2.3950    0.0446 H   0  0  0  0  0  0  0  0  0  0  0  0
   -5.6210    1.0271   -0.2375 H   0  0  0  0  0  0  0  0  0  0  0  0
   -4.2949   -2.9468   -0.2966 H   0  0  0  0  0  0  0  0  0  0  0  0
   -3.6464    3.2423    0.1300 C   0  0  0  0  0  0  0  0  0  0  0  0
   -4.3833    3.2570    0.9395 H   0  0  0  0  0  0  0  0  0  0  0  0
   -2.9285    4.0583    0.2642 H   0  0  0  0  0  0  0  0  0  0  0  0
   -4.1394    3.3361   -0.8431 H   0  0  0  0  0  0  0  0  0  0  0  0
   -6.4020   -1.5164   -0.4797 C   0  0  0  0  0  0  0  0  0  0  0  0
   -6.4344   -2.0313   -1.4457 H   0  0  0  0  0  0  0  0  0  0  0  0
   -7.1148   -0.6852   -0.4799 H   0  0  0  0  0  0  0  0  0  0  0  0
   -6.6445   -2.2077    0.3344 H   0  0  0  0  0  0  0  0  0  0  0  0
    3.3161    0.3041   -0.1376 N   0  0  0  0  0  0  0  0  0  0  0  0
    3.7554   -0.8016    0.5101 C   0  0  0  0  0  0  0  0  0  0  0  0
    5.1470   -0.8502    0.3085 C   0  0  0  0  0  0  0  0  0  0  0  0
    5.4956    0.2137   -0.4439 N   0  0  0  0  0  0  0  0  0  0  0  0
    4.3779    0.8713   -0.6853 C   0  0  0  0  0  0  0  0  0  0  0  0
    6.0013   -1.8148    0.7944 N   0  0  0  0  0  0  0  0  0  0  0  0
    3.0172   -1.4014    1.0254 H   0  0  0  0  0  0  0  0  0  0  0  0
    4.3402    1.7808   -1.2721 H   0  0  0  0  0  0  0  0  0  0  0  0
    6.9967   -1.7717    0.5994 H   0  0  0  0  0  0  0  0  0  0  0  0
    5.6595   -2.5889    1.3571 H   0  0  0  0  0  0  0  0  0  0  0  0
    6.8172    0.6085   -0.9229 C   0  0  0  0  0  0  0  0  0  0  0  0
    7.2111   -0.2002   -1.5467 H   0  0  0  0  0  0  0  0  0  0  0  0
    7.4613    0.7739   -0.0534 H   0  0  0  0  0  0  0  0  0  0  0  0
    6.7359    1.5292   -1.5100 H   0  0  0  0  0  0  0  0  0  0  0  0
    1.9691    0.8752   -0.2841 C   0  0  1  0  0  0  0  0  0  0  0  0
    2.0060    1.7847   -0.8958 H   0  0  0  0  0  0  0  0  0  0  0  0
    0.8913   -0.1168   -0.7646 C   0  0  0  0  0  0  0  0  0  0  0  0
    1.2487   -1.1417   -0.9066 H   0  0  0  0  0  0  0  0  0  0  0  0
    0.3555    0.2366   -1.6519 H   0  0  0  0  0  0  0  0  0  0  0  0
    0.1149    0.0840    0.5547 C   0  0  1  0  0  0  0  0  0  0  0  0
    0.0977   -0.7983    1.2017 H   0  0  0  0  0  0  0  0  0  0  0  0
    1.2023    1.0781    1.0375 C   0  0  0  0  0  0  0  0  0  0  0  0
    1.7413    0.7186    1.9200 H   0  0  0  0  0  0  0  0  0  0  0  0
    0.8830    2.1112    1.1901 H   0  0  0  0  0  0  0  0  0  0  0  0
  1  6  1  1  0  0  0
  1  2  1  0  0  0  0
  2  3  1  1  0  0  0
  2 43  1  0  0  0  0
  3 11  1  0  0  0  0
  4  1  1  0  0  0  0
  4  5  1  0  0  0  0
  5  3  1  0  0  0  0
  6  8  1  0  0  0  0
  7 10  1  0  0  0  0
  7  9  1  0  0  0  0
  8 13  1  0  0  0  0
  9  4  2  0  0  0  0
 10  6  2  0  0  0  0
 12  8  1  0  0  0  0
 14  9  1  0  0  0  0
 15 10  1  0  0  0  0
 16  5  1  0  0  0  0
 16 18  1  0  0  0  0
 16 17  1  0  0  0  0
 19 16  1  0  0  0  0
 20  7  1  0  0  0  0
 20 23  1  0  0  0  0
 21 20  1  0  0  0  0
 22 20  1  0  0  0  0
 24 25  1  0  0  0  0
 25 30  1  0  0  0  0
 26 25  2  0  0  0  0
 26 29  1  0  0  0  0
 27 26  1  0  0  0  0
 28 27  1  0  0  0  0
 28 24  1  0  0  0  0
 29 33  1  0  0  0  0
 31 28  1  0  0  0  0
 32 29  1  0  0  0  0
 34 27  1  0  0  0  0
 34 36  1  0  0  0  0
 35 34  1  0  0  0  0
 37 34  1  0  0  0  0
 38 39  1  6  0  0  0
 38 24  1  0  0  0  0
 38 45  1  0  0  0  0
 40 38  1  0  0  0  0
 40 43  1  0  0  0  0
 41 40  1  0  0  0  0
 42 40  1  0  0  0  0
 43 45  1  0  0  0  0
 43 44  1  1  0  0  0
 45 47  1  0  0  0  0
 45 46  1  0  0  0  0
M  END
>  <energy_and_gap>
-15.368  4.440

$$$$
BEA_40/Syn024507/Syn024507.car
 OpenBabel12061810373D

 52 54  0  0  0  0  0  0  0  0999 V2000
   -0.5785    3.5132    1.0687 N   0  0  0  0  0  0  0  0  0  0  0  0
   -1.1912    2.4755    0.3280 C   0  0  0  0  0  0  0  0  0  0  0  0
   -2.5947    2.1878    0.4267 C   0  0  0  0  0  0  0  0  0  0  0  0
   -3.4589    2.9243    1.2705 N   0  0  0  0  0  0  0  0  0  0  0  0
   -3.1652    1.1332   -0.3351 C   0  0  0  0  0  0  0  0  0  0  0  0
   -2.3060    0.3998   -1.1530 C   0  0  0  0  0  0  0  0  0  0  0  0
   -2.5570   -0.6117   -1.9273 N   0  0  0  0  0  0  0  0  0  0  0  0
   -1.4193   -0.9605   -2.4717 C   0  0  0  0  0  0  0  0  0  0  0  0
   -0.4360   -0.2020   -2.0519 N   0  0  0  0  0  0  0  0  0  0  0  0
   -0.9623    0.6698   -1.2420 C   0  0  0  0  0  0  0  0  0  0  0  0
   -0.3608    1.7075   -0.5301 C   0  0  0  0  0  0  0  0  0  0  0  0
    0.4169    3.6950    0.9727 H   0  0  0  0  0  0  0  0  0  0  0  0
   -1.1017    4.1065    1.7039 H   0  0  0  0  0  0  0  0  0  0  0  0
   -4.4481    2.6949    1.3172 H   0  0  0  0  0  0  0  0  0  0  0  0
   -3.1311    3.6954    1.8422 H   0  0  0  0  0  0  0  0  0  0  0  0
   -4.2245    0.9001   -0.2761 H   0  0  0  0  0  0  0  0  0  0  0  0
   -1.3045   -1.7809   -3.1700 H   0  0  0  0  0  0  0  0  0  0  0  0
    0.7016    1.9129   -0.6180 H   0  0  0  0  0  0  0  0  0  0  0  0
   -3.8285   -1.2856   -2.1869 C   0  0  0  0  0  0  0  0  0  0  0  0
   -3.6792   -2.0904   -2.9146 H   0  0  0  0  0  0  0  0  0  0  0  0
   -4.1973   -1.7000   -1.2428 H   0  0  0  0  0  0  0  0  0  0  0  0
   -4.5340   -0.5495   -2.5862 H   0  0  0  0  0  0  0  0  0  0  0  0
    0.6068   -1.9198    0.5357 N   0  0  0  0  0  0  0  0  0  0  0  0
   -0.5810   -2.5571    0.6507 C   0  0  0  0  0  0  0  0  0  0  0  0
   -1.1864   -2.0511    1.8157 C   0  0  0  0  0  0  0  0  0  0  0  0
   -0.3427   -1.1552    2.3681 N   0  0  0  0  0  0  0  0  0  0  0  0
    0.7156   -1.1186    1.5823 C   0  0  0  0  0  0  0  0  0  0  0  0
   -2.4273   -2.4008    2.2985 N   0  0  0  0  0  0  0  0  0  0  0  0
   -0.8406   -3.2728   -0.1180 H   0  0  0  0  0  0  0  0  0  0  0  0
    1.5737   -0.4867    1.7706 H   0  0  0  0  0  0  0  0  0  0  0  0
   -2.7901   -1.9806    3.1486 H   0  0  0  0  0  0  0  0  0  0  0  0
   -3.0072   -3.0850    1.8206 H   0  0  0  0  0  0  0  0  0  0  0  0
   -0.5125   -0.3501    3.5740 C   0  0  0  0  0  0  0  0  0  0  0  0
   -1.3877    0.2927    3.4349 H   0  0  0  0  0  0  0  0  0  0  0  0
   -0.6613   -1.0277    4.4206 H   0  0  0  0  0  0  0  0  0  0  0  0
    0.3805    0.2626    3.7361 H   0  0  0  0  0  0  0  0  0  0  0  0
    4.8064    1.7794   -0.6909 N   0  0  0  0  0  0  0  0  0  0  0  0
    4.2029    2.0383   -1.4659 H   0  0  0  0  0  0  0  0  0  0  0  0
    5.5693    2.4279   -0.5149 H   0  0  0  0  0  0  0  0  0  0  0  0
    4.6074    0.6297    0.0666 C   0  0  0  0  0  0  0  0  0  0  0  0
    5.5165    0.4206    1.0838 N   0  0  0  0  0  0  0  0  0  0  0  0
    6.2875    1.0535    1.2803 H   0  0  0  0  0  0  0  0  0  0  0  0
    5.4572   -0.3910    1.6926 H   0  0  0  0  0  0  0  0  0  0  0  0
    3.5899   -0.2911   -0.1225 N   0  0  0  0  0  0  0  0  0  0  0  0
    2.8312   -0.0109   -1.0619 N   0  0  0  0  0  0  0  0  0  0  0  0
    1.8428   -0.8074   -1.3115 C   0  0  0  0  0  0  0  0  0  0  0  0
    1.5822   -2.0957   -0.5447 C   0  0  0  0  0  0  0  0  0  0  0  0
    1.1960   -2.8615   -1.2264 H   0  0  0  0  0  0  0  0  0  0  0  0
    2.4871   -2.5154   -0.0914 H   0  0  0  0  0  0  0  0  0  0  0  0
    0.9551   -0.4180   -2.4659 C   0  0  0  0  0  0  0  0  0  0  0  0
    0.9771   -1.2001   -3.2334 H   0  0  0  0  0  0  0  0  0  0  0  0
    1.2858    0.5122   -2.9436 H   0  0  0  0  0  0  0  0  0  0  0  0
  1 13  1  0  0  0  0
  2  3  1  0  0  0  0
  2  1  1  0  0  0  0
  3  4  1  0  0  0  0
  4 14  1  0  0  0  0
  4 15  1  0  0  0  0
  5 16  1  0  0  0  0
  5  3  2  0  0  0  0
  6  5  1  0  0  0  0
  7  6  1  0  0  0  0
  8  9  1  0  0  0  0
  8  7  1  0  0  0  0
  9 10  1  0  0  0  0
 10  6  2  0  0  0  0
 10 11  1  0  0  0  0
 11  2  2  0  0  0  0
 12  1  1  0  0  0  0
 17  8  1  0  0  0  0
 18 11  1  0  0  0  0
 19  7  1  0  0  0  0
 19 21  1  0  0  0  0
 20 19  1  0  0  0  0
 22 19  1  0  0  0  0
 23 24  1  0  0  0  0
 23 27  1  0  0  0  0
 24 25  2  0  0  0  0
 25 28  1  0  0  0  0
 25 26  1  0  0  0  0
 26 33  1  0  0  0  0
 27 30  1  0  0  0  0
 27 26  1  0  0  0  0
 28 31  1  0  0  0  0
 29 24  1  0  0  0  0
 32 28  1  0  0  0  0
 33 36  1  0  0  0  0
 33 35  1  0  0  0  0
 34 33  1  0  0  0  0
 37 39  1  0  0  0  0
 37 40  2  0  0  0  0
 38 37  1  0  0  0  0
 40 41  1  0  0  0  0
 41 42  1  0  0  0  0
 41 43  1  0  0  0  0
 44 40  1  0  0  0  0
 45 44  1  0  0  0  0
 46 45  2  0  0  0  0
 46 47  1  0  0  0  0
 47 49  1  0  0  0  0
 47 23  1  0  0  0  0
 48 47  1  0  0  0  0
 50  9  1  0  0  0  0
 50 46  1  0  0  0  0
 51 50  1  0  0  0  0
 52 50  1  0  0  0  0
M  RAD  1  44   2
M  END
>  <energy_and_gap>
-15.009  4.316

$$$$
BEA_40/Syn091634/Syn091634.car
 OpenBabel12061810373D

 53 54  0  0  1  0  0  0  0  0999 V2000
    2.3442    1.0640    0.6319 C   0  0  0  0  0  0  0  0  0  0  0  0
    3.5743    0.8799    0.1920 N   0  0  0  0  0  0  0  0  0  0  0  0
    3.7278   -0.4503   -0.0254 C   0  0  0  0  0  0  0  0  0  0  0  0
    2.4816   -1.0449    0.3266 C   0  0  0  0  0  0  0  0  0  0  0  0
    1.6493   -0.0548    0.7233 N   0  0  0  0  0  0  0  0  0  0  0  0
    2.1488   -2.3842    0.2879 N   0  0  0  0  0  0  0  0  0  0  0  0
    4.9983   -1.0736   -0.5312 C   0  0  0  0  0  0  0  0  0  0  0  0
    4.7986   -1.7525   -1.8966 C   0  0  0  0  0  0  0  0  0  0  0  0
    5.6105   -2.0414    0.4953 C   0  0  0  0  0  0  0  0  0  0  0  0
    1.9479    2.0373    0.8924 H   0  0  0  0  0  0  0  0  0  0  0  0
    1.2366   -2.7028    0.5953 H   0  0  0  0  0  0  0  0  0  0  0  0
    2.8012   -3.0922   -0.0330 H   0  0  0  0  0  0  0  0  0  0  0  0
    5.7313   -0.2767   -0.6839 H   0  0  0  0  0  0  0  0  0  0  0  0
    4.1193   -2.6075   -1.8396 H   0  0  0  0  0  0  0  0  0  0  0  0
    4.3849   -1.0500   -2.6271 H   0  0  0  0  0  0  0  0  0  0  0  0
    5.7531   -2.1169   -2.2885 H   0  0  0  0  0  0  0  0  0  0  0  0
    5.7704   -1.5434    1.4569 H   0  0  0  0  0  0  0  0  0  0  0  0
    4.9739   -2.9119    0.6761 H   0  0  0  0  0  0  0  0  0  0  0  0
    6.5797   -2.4102    0.1460 H   0  0  0  0  0  0  0  0  0  0  0  0
    4.5211    1.9778    0.0084 C   0  0  0  0  0  0  0  0  0  0  0  0
    5.3884    1.7929    0.6502 H   0  0  0  0  0  0  0  0  0  0  0  0
    4.8178    2.0014   -1.0450 H   0  0  0  0  0  0  0  0  0  0  0  0
    4.0498    2.9273    0.2836 H   0  0  0  0  0  0  0  0  0  0  0  0
   -3.7653   -1.0337   -0.4938 C   0  0  2  0  0  0  0  0  0  0  0  0
   -4.6410   -1.7660    0.1756 N   0  0  0  0  0  0  0  0  0  0  0  0
   -3.9393   -2.6786    0.8815 C   0  0  0  0  0  0  0  0  0  0  0  0
   -2.5814   -2.4579    0.6002 C   0  0  0  0  0  0  0  0  0  0  0  0
   -2.5179   -1.4186   -0.2639 N   0  0  0  0  0  0  0  0  0  0  0  0
   -4.1163    0.0060   -1.3303 N   0  0  0  0  0  0  0  0  0  0  0  0
   -4.4959   -3.3726    1.4966 H   0  0  0  0  0  0  0  0  0  0  0  0
   -1.6493   -2.9114    0.9087 H   0  0  0  0  0  0  0  0  0  0  0  0
   -3.4097    0.5566   -1.8060 H   0  0  0  0  0  0  0  0  0  0  0  0
   -5.0896    0.2526   -1.4779 H   0  0  0  0  0  0  0  0  0  0  0  0
   -6.1002   -1.6706    0.2019 C   0  0  0  0  0  0  0  0  0  0  0  0
   -6.4728   -1.8261   -0.8156 H   0  0  0  0  0  0  0  0  0  0  0  0
   -6.5106   -2.4351    0.8696 H   0  0  0  0  0  0  0  0  0  0  0  0
   -6.3726   -0.6744    0.5650 H   0  0  0  0  0  0  0  0  0  0  0  0
   -0.9542    4.7165    0.7433 N   0  0  0  0  0  0  0  0  0  0  0  0
   -1.2928    5.6434    0.4990 H   0  0  0  0  0  0  0  0  0  0  0  0
   -0.3445    4.6787    1.5554 H   0  0  0  0  0  0  0  0  0  0  0  0
   -1.2890    3.5791    0.0366 C   0  0  0  0  0  0  0  0  0  0  0  0
   -2.1322    3.7744   -1.0524 N   0  0  0  0  0  0  0  0  0  0  0  0
   -2.4843    4.6905   -1.3172 H   0  0  0  0  0  0  0  0  0  0  0  0
   -2.4454    3.0136   -1.6478 H   0  0  0  0  0  0  0  0  0  0  0  0
   -0.7761    2.3599    0.4478 N   0  0  0  0  0  0  0  0  0  0  0  0
   -1.1477    1.4017   -0.2451 N   0  0  0  0  0  0  0  0  0  0  0  0
   -0.7165    0.2207    0.0599 C   0  0  0  0  0  0  0  0  0  0  0  0
    0.2581   -0.0611    1.1891 C   0  0  0  0  0  0  0  0  0  0  0  0
    0.0618   -1.0425    1.6310 H   0  0  0  0  0  0  0  0  0  0  0  0
    0.1748    0.6577    2.0124 H   0  0  0  0  0  0  0  0  0  0  0  0
   -1.2381   -0.9140   -0.7762 C   0  0  0  0  0  0  0  0  0  0  0  0
   -0.5289   -1.7473   -0.8067 H   0  0  0  0  0  0  0  0  0  0  0  0
   -1.3953   -0.6068   -1.8164 H   0  0  0  0  0  0  0  0  0  0  0  0
  1  5  1  0  0  0  0
  1 10  1  0  0  0  0
  2  1  1  0  0  0  0
  3  2  1  0  0  0  0
  3  4  2  0  0  0  0
  4  5  1  0  0  0  0
  5 48  1  0  0  0  0
  6  4  1  0  0  0  0
  6 11  1  0  0  0  0
  7  3  1  0  0  0  0
  7  9  1  0  0  0  0
  8 14  1  0  0  0  0
  8  7  1  0  0  0  0
  9 18  1  0  0  0  0
  9 17  1  0  0  0  0
 12  6  1  0  0  0  0
 13  7  1  0  0  0  0
 15  8  1  0  0  0  0
 16  8  1  0  0  0  0
 19  9  1  0  0  0  0
 20  2  1  0  0  0  0
 20 23  1  0  0  0  0
 20 21  1  0  0  0  0
 22 20  1  0  0  0  0
 24 29  1  1  0  0  0
 24 28  1  0  0  0  0
 24 25  1  0  0  0  0
 25 34  1  0  0  0  0
 25 26  1  0  0  0  0
 26 30  1  0  0  0  0
 27 26  2  0  0  0  0
 27 31  1  0  0  0  0
 28 27  1  0  0  0  0
 32 29  1  0  0  0  0
 33 29  1  0  0  0  0
 34 37  1  0  0  0  0
 34 36  1  0  0  0  0
 35 34  1  0  0  0  0
 38 40  1  0  0  0  0
 39 38  1  0  0  0  0
 41 45  1  0  0  0  0
 41 38  1  0  0  0  0
 42 41  2  0  0  0  0
 43 42  1  0  0  0  0
 44 42  1  0  0  0  0
 46 47  2  0  0  0  0
 46 45  1  0  0  0  0
 47 48  1  0  0  0  0
 48 49  1  0  0  0  0
 48 50  1  0  0  0  0
 51 28  1  0  0  0  0
 51 47  1  0  0  0  0
 52 51  1  0  0  0  0
 53 51  1  0  0  0  0
M  RAD  1  45   2
M  END
>  <energy_and_gap>
-15.291  4.143

$$$$
BEA_40/Syn025567/Syn025567.car
 OpenBabel12061810373D

 50 54  0  0  1  0  0  0  0  0999 V2000
   -0.0862    2.7677    0.0550 N   0  0  0  0  0  0  0  0  0  0  0  0
   -0.9277    1.6689    0.0120 C   0  0  1  0  0  0  0  0  0  0  0  0
   -0.5057    0.4097    0.0045 N   0  0  0  0  0  0  0  0  0  0  0  0
   -1.6241   -0.3800   -0.0300 C   0  0  0  0  0  0  0  0  0  0  0  0
   -1.7489   -1.7696   -0.0724 C   0  0  0  0  0  0  0  0  0  0  0  0
   -3.0558   -2.2862   -0.0841 C   0  0  0  0  0  0  0  0  0  0  0  0
   -4.1982   -1.4494   -0.0391 C   0  0  0  0  0  0  0  0  0  0  0  0
   -5.4846   -2.0439   -0.0360 C   0  0  0  0  0  0  0  0  0  0  0  0
   -6.6399   -1.2473    0.0244 C   0  0  0  0  0  0  0  0  0  0  0  0
   -6.5294    0.1503    0.0878 C   0  0  0  0  0  0  0  0  0  0  0  0
   -5.2653    0.7666    0.0834 C   0  0  0  0  0  0  0  0  0  0  0  0
   -4.0806   -0.0167    0.0091 C   0  0  0  0  0  0  0  0  0  0  0  0
   -2.7611    0.4893   -0.0085 C   0  0  0  0  0  0  0  0  0  0  0  0
   -2.2509    1.7597   -0.0204 N   0  0  0  0  0  0  0  0  0  0  0  0
    0.9074    2.6879   -0.1144 H   0  0  0  0  0  0  0  0  0  0  0  0
   -0.4281    3.6950    0.2801 H   0  0  0  0  0  0  0  0  0  0  0  0
   -0.9042   -2.4477   -0.1007 H   0  0  0  0  0  0  0  0  0  0  0  0
   -3.1740   -3.3654   -0.1201 H   0  0  0  0  0  0  0  0  0  0  0  0
   -7.6194   -1.7134    0.0282 H   0  0  0  0  0  0  0  0  0  0  0  0
   -7.4259    0.7587    0.1435 H   0  0  0  0  0  0  0  0  0  0  0  0
   -5.2455    1.8452    0.1501 H   0  0  0  0  0  0  0  0  0  0  0  0
   -3.0200    3.0092   -0.0936 C   0  0  0  0  0  0  0  0  0  0  0  0
   -3.7340    2.9299   -0.9185 H   0  0  0  0  0  0  0  0  0  0  0  0
   -3.5241    3.1613    0.8661 H   0  0  0  0  0  0  0  0  0  0  0  0
   -2.3738    3.8626   -0.3068 H   0  0  0  0  0  0  0  0  0  0  0  0
   -5.5991   -3.1233   -0.0762 H   0  0  0  0  0  0  0  0  0  0  0  0
    6.3274    0.0221   -0.0195 N   0  0  0  0  0  0  0  0  0  0  0  0
    5.9704   -1.2758    0.0382 C   0  0  0  0  0  0  0  0  0  0  0  0
    4.5629   -1.2931    0.0485 C   0  0  0  0  0  0  0  0  0  0  0  0
    4.1213   -0.0103   -0.0033 N   0  0  0  0  0  0  0  0  0  0  0  0
    5.2168    0.7324   -0.0423 C   0  0  0  0  0  0  0  0  0  0  0  0
    3.7914   -2.4328    0.1026 N   0  0  0  0  0  0  0  0  0  0  0  0
    6.7671   -2.0078    0.0640 H   0  0  0  0  0  0  0  0  0  0  0  0
    5.2242    1.8147   -0.0883 H   0  0  0  0  0  0  0  0  0  0  0  0
    4.2180   -3.3546    0.1388 H   0  0  0  0  0  0  0  0  0  0  0  0
    2.7795   -2.3853    0.1081 H   0  0  0  0  0  0  0  0  0  0  0  0
    7.6978    0.5210   -0.0500 C   0  0  0  0  0  0  0  0  0  0  0  0
    8.1931    0.1128   -0.9369 H   0  0  0  0  0  0  0  0  0  0  0  0
    8.2048    0.1904    0.8623 H   0  0  0  0  0  0  0  0  0  0  0  0
    7.6840    1.6149   -0.0971 H   0  0  0  0  0  0  0  0  0  0  0  0
    0.8470   -0.2072    0.0350 C   0  0  1  0  0  0  0  0  0  0  0  0
    0.7711   -1.2941    0.0974 H   0  0  0  0  0  0  0  0  0  0  0  0
    1.8208    0.2056   -1.0881 C   0  0  0  0  0  0  0  0  0  0  0  0
    2.1731   -0.6394   -1.6879 H   0  0  0  0  0  0  0  0  0  0  0  0
    1.4468    1.0065   -1.7333 H   0  0  0  0  0  0  0  0  0  0  0  0
    2.8271    0.6970   -0.0246 C   0  0  1  0  0  0  0  0  0  0  0  0
    2.9870    1.7805   -0.0767 H   0  0  0  0  0  0  0  0  0  0  0  0
    1.8411    0.3070    1.0981 C   0  0  0  0  0  0  0  0  0  0  0  0
    1.4827    1.1612    1.6797 H   0  0  0  0  0  0  0  0  0  0  0  0
    2.2072   -0.4815    1.7633 H   0  0  0  0  0  0  0  0  0  0  0  0
  1 16  1  0  0  0  0
  2  1  1  1  0  0  0
  3  2  1  0  0  0  0
  3 41  1  0  0  0  0
  4 13  1  0  0  0  0
  4  3  1  0  0  0  0
  5  4  2  0  0  0  0
  6  5  1  0  0  0  0
  6  7  1  0  0  0  0
  7  8  2  0  0  0  0
  7 12  1  0  0  0  0
  8  9  1  0  0  0  0
  9 19  1  0  0  0  0
  9 10  2  0  0  0  0
 10 20  1  0  0  0  0
 11 10  1  0  0  0  0
 11 21  1  0  0  0  0
 12 11  1  0  0  0  0
 13 12  2  0  0  0  0
 14 13  1  0  0  0  0
 14  2  1  0  0  0  0
 15  1  1  0  0  0  0
 17  5  1  0  0  0  0
 18  6  1  0  0  0  0
 22 14  1  0  0  0  0
 22 24  1  0  0  0  0
 23 22  1  0  0  0  0
 25 22  1  0  0  0  0
 26  8  1  0  0  0  0
 27 28  1  0  0  0  0
 28 29  2  0  0  0  0
 28 33  1  0  0  0  0
 29 32  1  0  0  0  0
 30 29  1  0  0  0  0
 31 27  1  0  0  0  0
 31 30  1  0  0  0  0
 32 36  1  0  0  0  0
 32 35  1  0  0  0  0
 34 31  1  0  0  0  0
 37 27  1  0  0  0  0
 37 39  1  0  0  0  0
 38 37  1  0  0  0  0
 40 37  1  0  0  0  0
 41 42  1  1  0  0  0
 41 48  1  0  0  0  0
 43 46  1  0  0  0  0
 43 41  1  0  0  0  0
 44 43  1  0  0  0  0
 45 43  1  0  0  0  0
 46 47  1  6  0  0  0
 46 30  1  0  0  0  0
 46 48  1  0  0  0  0
 48 49  1  0  0  0  0
 48 50  1  0  0  0  0
M  END
>  <energy_and_gap>
-15.014  4.087

$$$$
BEA_40/Syn051513/Syn051513.car
 OpenBabel12061810373D

 53 55  0  0  1  0  0  0  0  0999 V2000
   -1.6816    2.1155    2.1440 N   0  0  0  0  0  0  0  0  0  0  0  0
   -2.2622    1.1058    1.3995 C   0  0  2  0  0  0  0  0  0  0  0  0
   -1.6552   -0.0281    1.0764 N   0  0  0  0  0  0  0  0  0  0  0  0
   -2.5262   -0.7533    0.3234 C   0  0  0  0  0  0  0  0  0  0  0  0
   -2.4054   -2.0009   -0.2814 C   0  0  0  0  0  0  0  0  0  0  0  0
   -3.5651   -2.3934   -0.9859 C   0  0  0  0  0  0  0  0  0  0  0  0
   -4.7217   -1.6663   -1.0996 N   0  0  0  0  0  0  0  0  0  0  0  0
   -4.8147   -0.4403   -0.4956 C   0  0  0  0  0  0  0  0  0  0  0  0
   -3.7102    0.0180    0.2188 C   0  0  0  0  0  0  0  0  0  0  0  0
   -3.4908    1.1652    0.9094 N   0  0  0  0  0  0  0  0  0  0  0  0
   -2.2019    2.9499    2.3948 H   0  0  0  0  0  0  0  0  0  0  0  0
   -0.7117    2.0650    2.4367 H   0  0  0  0  0  0  0  0  0  0  0  0
   -1.5160   -2.6192   -0.2263 H   0  0  0  0  0  0  0  0  0  0  0  0
   -3.5599   -3.3555   -1.4903 H   0  0  0  0  0  0  0  0  0  0  0  0
   -5.7378    0.1219   -0.5979 H   0  0  0  0  0  0  0  0  0  0  0  0
   -5.8321   -2.2256   -1.8709 C   0  0  0  0  0  0  0  0  0  0  0  0
   -6.6793   -1.5322   -1.8619 H   0  0  0  0  0  0  0  0  0  0  0  0
   -5.4947   -2.3821   -2.9009 H   0  0  0  0  0  0  0  0  0  0  0  0
   -6.1287   -3.1754   -1.4134 H   0  0  0  0  0  0  0  0  0  0  0  0
   -4.4353    2.2736    1.0759 C   0  0  0  0  0  0  0  0  0  0  0  0
   -5.3784    2.0476    0.5715 H   0  0  0  0  0  0  0  0  0  0  0  0
   -3.9918    3.1737    0.6378 H   0  0  0  0  0  0  0  0  0  0  0  0
   -4.6181    2.4139    2.1463 H   0  0  0  0  0  0  0  0  0  0  0  0
    4.0618   -1.0213   -0.3704 C   0  0  2  0  0  0  0  0  0  0  0  0
    5.0915   -1.1330    0.4536 N   0  0  0  0  0  0  0  0  0  0  0  0
    4.6028   -1.5157    1.6524 C   0  0  0  0  0  0  0  0  0  0  0  0
    3.2114   -1.6331    1.5084 C   0  0  0  0  0  0  0  0  0  0  0  0
    2.9136   -1.3090    0.2277 N   0  0  0  0  0  0  0  0  0  0  0  0
    4.1832   -0.6558   -1.6956 N   0  0  0  0  0  0  0  0  0  0  0  0
    5.3088   -1.6597    2.4591 H   0  0  0  0  0  0  0  0  0  0  0  0
    2.3938   -1.9079    2.1608 H   0  0  0  0  0  0  0  0  0  0  0  0
    5.0932   -0.4719   -2.1053 H   0  0  0  0  0  0  0  0  0  0  0  0
    3.3666   -0.5378   -2.2854 H   0  0  0  0  0  0  0  0  0  0  0  0
    6.5135   -0.9063    0.1972 C   0  0  0  0  0  0  0  0  0  0  0  0
    6.6415    0.1282   -0.1372 H   0  0  0  0  0  0  0  0  0  0  0  0
    6.8378   -1.6062   -0.5795 H   0  0  0  0  0  0  0  0  0  0  0  0
    7.0881   -1.0743    1.1138 H   0  0  0  0  0  0  0  0  0  0  0  0
    0.9670    3.6511   -0.6448 N   0  0  0  0  0  0  0  0  0  0  0  0
    0.3290    3.4775    0.1259 H   0  0  0  0  0  0  0  0  0  0  0  0
    1.0566    4.6292   -0.9069 H   0  0  0  0  0  0  0  0  0  0  0  0
    1.6642    2.6341   -1.2887 C   0  0  0  0  0  0  0  0  0  0  0  0
    2.4942    3.0367   -2.3153 N   0  0  0  0  0  0  0  0  0  0  0  0
    2.6012    4.0078   -2.5966 H   0  0  0  0  0  0  0  0  0  0  0  0
    3.0464    2.3691   -2.8465 H   0  0  0  0  0  0  0  0  0  0  0  0
    1.5874    1.2863   -0.9797 N   0  0  0  0  0  0  0  0  0  0  0  0
    0.8134    1.0294   -0.0471 N   0  0  0  0  0  0  0  0  0  0  0  0
    0.6888   -0.2058    0.3179 C   0  0  0  0  0  0  0  0  0  0  0  0
    1.5233   -1.3401   -0.2485 C   0  0  0  0  0  0  0  0  0  0  0  0
    1.5275   -1.3216   -1.3428 H   0  0  0  0  0  0  0  0  0  0  0  0
    1.1101   -2.3148    0.0337 H   0  0  0  0  0  0  0  0  0  0  0  0
   -0.2987   -0.4888    1.4168 C   0  0  0  0  0  0  0  0  0  0  0  0
    0.0115   -0.0060    2.3490 H   0  0  0  0  0  0  0  0  0  0  0  0
   -0.3604   -1.5596    1.6378 H   0  0  0  0  0  0  0  0  0  0  0  0
  1 11  1  0  0  0  0
  1 12  1  0  0  0  0
  2  1  1  6  0  0  0
  3  2  1  0  0  0  0
  3 51  1  0  0  0  0
  4  3  1  0  0  0  0
  5 13  1  0  0  0  0
  5  4  2  0  0  0  0
  6  5  1  0  0  0  0
  7  6  1  0  0  0  0
  7  8  1  0  0  0  0
  8  9  2  0  0  0  0
  9  4  1  0  0  0  0
  9 10  1  0  0  0  0
 10 20  1  0  0  0  0
 10  2  1  0  0  0  0
 14  6  1  0  0  0  0
 15  8  1  0  0  0  0
 16 17  1  0  0  0  0
 16 19  1  0  0  0  0
 16  7  1  0  0  0  0
 18 16  1  0  0  0  0
 20 23  1  0  0  0  0
 21 20  1  0  0  0  0
 22 20  1  0  0  0  0
 24 29  1  6  0  0  0
 24 28  1  0  0  0  0
 24 25  1  0  0  0  0
 25 26  1  0  0  0  0
 26 30  1  0  0  0  0
 27 26  2  0  0  0  0
 27 31  1  0  0  0  0
 28 27  1  0  0  0  0
 32 29  1  0  0  0  0
 33 29  1  0  0  0  0
 34 25  1  0  0  0  0
 34 37  1  0  0  0  0
 35 34  1  0  0  0  0
 36 34  1  0  0  0  0
 38 39  1  0  0  0  0
 40 38  1  0  0  0  0
 41 45  1  0  0  0  0
 41 38  1  0  0  0  0
 42 41  2  0  0  0  0
 43 42  1  0  0  0  0
 44 42  1  0  0  0  0
 45 46  1  0  0  0  0
 46 47  2  0  0  0  0
 47 51  1  0  0  0  0
 48 50  1  0  0  0  0
 48 28  1  0  0  0  0
 48 47  1  0  0  0  0
 49 48  1  0  0  0  0
 51 53  1  0  0  0  0
 51 52  1  0  0  0  0
M  RAD  1  45   2
M  END
>  <energy_and_gap>
-15.103  4.044

$$$$
BEA_40/Syn021302/Syn021302.car
 OpenBabel12061810373D

 49 52  0  0  1  0  0  0  0  0999 V2000
   -1.6410   -2.3345   -0.0312 N   0  0  0  0  0  0  0  0  0  0  0  0
   -2.6134   -1.3102   -0.0015 C   0  0  0  0  0  0  0  0  0  0  0  0
   -3.9717   -1.6106    0.1292 N   0  0  0  0  0  0  0  0  0  0  0  0
   -4.9047   -0.5729    0.1323 C   0  0  2  0  0  0  0  0  0  0  0  0
   -6.2924   -0.8558    0.1826 N   0  0  0  0  0  0  0  0  0  0  0  0
   -4.5762    0.8045    0.0764 C   0  0  0  0  0  0  0  0  0  0  0  0
   -3.2212    1.0631   -0.0325 C   0  0  0  0  0  0  0  0  0  0  0  0
   -2.2384    0.0412   -0.0954 C   0  0  0  0  0  0  0  0  0  0  0  0
   -1.0358    0.6847   -0.2627 N   0  0  0  0  0  0  0  0  0  0  0  0
   -1.2940    1.9789   -0.2318 C   0  0  0  0  0  0  0  0  0  0  0  0
   -2.5705    2.2438   -0.1035 N   0  0  0  0  0  0  0  0  0  0  0  0
   -0.7315   -2.2048    0.3989 H   0  0  0  0  0  0  0  0  0  0  0  0
   -1.8551   -3.2363   -0.4446 H   0  0  0  0  0  0  0  0  0  0  0  0
   -6.9731   -0.1089    0.2975 H   0  0  0  0  0  0  0  0  0  0  0  0
   -6.6487   -1.7946    0.0393 H   0  0  0  0  0  0  0  0  0  0  0  0
   -5.3189    1.5970    0.0982 H   0  0  0  0  0  0  0  0  0  0  0  0
   -0.5518    2.7630   -0.3029 H   0  0  0  0  0  0  0  0  0  0  0  0
   -4.4234   -3.0052    0.3050 C   0  0  0  0  0  0  0  0  0  0  0  0
   -3.6166   -3.6367    0.6835 H   0  0  0  0  0  0  0  0  0  0  0  0
   -5.2205   -3.0423    1.0536 H   0  0  0  0  0  0  0  0  0  0  0  0
   -4.7758   -3.3774   -0.6625 H   0  0  0  0  0  0  0  0  0  0  0  0
   -3.1417    3.5878   -0.0597 C   0  0  0  0  0  0  0  0  0  0  0  0
   -3.6933    3.6974    0.8796 H   0  0  0  0  0  0  0  0  0  0  0  0
   -2.3393    4.3314   -0.1091 H   0  0  0  0  0  0  0  0  0  0  0  0
   -3.8124    3.7043   -0.9171 H   0  0  0  0  0  0  0  0  0  0  0  0
    3.5521    0.2808    0.1018 N   0  0  0  0  0  0  0  0  0  0  0  0
    3.9259   -0.9123   -0.4197 C   0  0  0  0  0  0  0  0  0  0  0  0
    5.3211   -0.9939   -0.2580 C   0  0  0  0  0  0  0  0  0  0  0  0
    5.7365    0.1377    0.3473 N   0  0  0  0  0  0  0  0  0  0  0  0
    4.6537    0.8654    0.5421 C   0  0  0  0  0  0  0  0  0  0  0  0
    6.1204   -2.0447   -0.6494 N   0  0  0  0  0  0  0  0  0  0  0  0
    3.1475   -1.5388   -0.8341 H   0  0  0  0  0  0  0  0  0  0  0  0
    4.6717    1.8400    1.0142 H   0  0  0  0  0  0  0  0  0  0  0  0
    7.1232   -2.0197   -0.4929 H   0  0  0  0  0  0  0  0  0  0  0  0
    5.7297   -2.8662   -1.1023 H   0  0  0  0  0  0  0  0  0  0  0  0
    7.0886    0.5322    0.7322 C   0  0  0  0  0  0  0  0  0  0  0  0
    7.0633    1.5197    1.2047 H   0  0  0  0  0  0  0  0  0  0  0  0
    7.7062    0.5646   -0.1710 H   0  0  0  0  0  0  0  0  0  0  0  0
    7.4747   -0.2109    1.4372 H   0  0  0  0  0  0  0  0  0  0  0  0
    0.3177    0.1210   -0.4499 C   0  0  1  0  0  0  0  0  0  0  0  0
    0.2411   -0.8305   -0.9835 H   0  0  0  0  0  0  0  0  0  0  0  0
    1.4256    0.9940   -1.0914 C   0  0  0  0  0  0  0  0  0  0  0  0
    1.9141    0.5011   -1.9381 H   0  0  0  0  0  0  0  0  0  0  0  0
    1.1382    2.0116   -1.3665 H   0  0  0  0  0  0  0  0  0  0  0  0
    2.2337    0.9210    0.2201 C   0  0  1  0  0  0  0  0  0  0  0  0
    2.3275    1.8961    0.7131 H   0  0  0  0  0  0  0  0  0  0  0  0
    1.1372    0.0410    0.8551 C   0  0  0  0  0  0  0  0  0  0  0  0
    1.4568   -0.9762    1.1027 H   0  0  0  0  0  0  0  0  0  0  0  0
    0.6528    0.5181    1.7135 H   0  0  0  0  0  0  0  0  0  0  0  0
  1  2  1  0  0  0  0
  1 12  1  0  0  0  0
  2  3  1  0  0  0  0
  3  4  1  0  0  0  0
  3 18  1  0  0  0  0
  4  5  1  6  0  0  0
  5 14  1  0  0  0  0
  6 16  1  0  0  0  0
  6  4  1  0  0  0  0
  7  6  2  0  0  0  0
  8  7  1  0  0  0  0
  8  2  2  0  0  0  0
  9 10  1  0  0  0  0
  9  8  1  0  0  0  0
 10 11  1  0  0  0  0
 11 22  1  0  0  0  0
 11  7  1  0  0  0  0
 13  1  1  0  0  0  0
 15  5  1  0  0  0  0
 17 10  1  0  0  0  0
 18 19  1  0  0  0  0
 18 20  1  0  0  0  0
 21 18  1  0  0  0  0
 22 23  1  0  0  0  0
 24 22  1  0  0  0  0
 25 22  1  0  0  0  0
 26 45  1  0  0  0  0
 26 30  1  0  0  0  0
 27 28  2  0  0  0  0
 27 26  1  0  0  0  0
 28 29  1  0  0  0  0
 29 30  1  0  0  0  0
 29 36  1  0  0  0  0
 30 33  1  0  0  0  0
 31 34  1  0  0  0  0
 31 28  1  0  0  0  0
 32 27  1  0  0  0  0
 35 31  1  0  0  0  0
 36 37  1  0  0  0  0
 36 39  1  0  0  0  0
 38 36  1  0  0  0  0
 40 41  1  6  0  0  0
 40  9  1  0  0  0  0
 40 47  1  0  0  0  0
 42 40  1  0  0  0  0
 42 45  1  0  0  0  0
 43 42  1  0  0  0  0
 44 42  1  0  0  0  0
 45 46  1  1  0  0  0
 45 47  1  0  0  0  0
 47 48  1  0  0  0  0
 47 49  1  0  0  0  0
M  END
>  <energy_and_gap>
-15.070  4.035

$$$$
BEA_40/Syn024459/Syn024459.car
 OpenBabel12061810373D

 49 51  0  0  0  0  0  0  0  0999 V2000
   -2.8064    3.6118   -0.9471 N   0  0  0  0  0  0  0  0  0  0  0  0
   -2.5668    2.2272   -0.7795 C   0  0  0  0  0  0  0  0  0  0  0  0
   -1.4310    1.6790   -1.4238 C   0  0  0  0  0  0  0  0  0  0  0  0
   -1.1007    0.3188   -1.2976 C   0  0  0  0  0  0  0  0  0  0  0  0
   -1.9429   -0.4676   -0.5132 C   0  0  0  0  0  0  0  0  0  0  0  0
   -1.8560   -1.7335   -0.2380 N   0  0  0  0  0  0  0  0  0  0  0  0
   -2.8779   -2.0191    0.5246 C   0  0  0  0  0  0  0  0  0  0  0  0
   -3.6236   -0.9641    0.7514 N   0  0  0  0  0  0  0  0  0  0  0  0
   -3.0617    0.0345    0.1211 C   0  0  0  0  0  0  0  0  0  0  0  0
   -3.4218    1.3944    0.0213 C   0  0  0  0  0  0  0  0  0  0  0  0
   -4.5631    1.9088    0.6788 N   0  0  0  0  0  0  0  0  0  0  0  0
   -2.2089    4.1671   -1.5535 H   0  0  0  0  0  0  0  0  0  0  0  0
   -3.5537    4.0936   -0.4586 H   0  0  0  0  0  0  0  0  0  0  0  0
   -0.7863    2.3093   -2.0290 H   0  0  0  0  0  0  0  0  0  0  0  0
   -0.2267   -0.0848   -1.7968 H   0  0  0  0  0  0  0  0  0  0  0  0
   -3.0750   -3.0101    0.9168 H   0  0  0  0  0  0  0  0  0  0  0  0
   -4.9404    2.8234    0.4557 H   0  0  0  0  0  0  0  0  0  0  0  0
   -5.0374    1.3752    1.3965 H   0  0  0  0  0  0  0  0  0  0  0  0
   -4.8157   -1.1486    1.5835 C   0  0  0  0  0  0  0  0  0  0  0  0
   -4.9641   -2.2073    1.8236 H   0  0  0  0  0  0  0  0  0  0  0  0
   -5.6838   -0.7839    1.0255 H   0  0  0  0  0  0  0  0  0  0  0  0
   -4.6778   -0.5804    2.5089 H   0  0  0  0  0  0  0  0  0  0  0  0
    3.3177   -0.7364    0.5383 N   0  0  0  0  0  0  0  0  0  0  0  0
    2.6843    0.3404    1.0549 C   0  0  0  0  0  0  0  0  0  0  0  0
    3.5270    1.4410    0.8128 C   0  0  0  0  0  0  0  0  0  0  0  0
    4.6274    0.9911    0.1730 N   0  0  0  0  0  0  0  0  0  0  0  0
    4.4610   -0.3100    0.0326 C   0  0  0  0  0  0  0  0  0  0  0  0
    3.2717    2.7472    1.1662 N   0  0  0  0  0  0  0  0  0  0  0  0
    1.7217    0.1736    1.5199 H   0  0  0  0  0  0  0  0  0  0  0  0
    5.1805   -0.9610   -0.4479 H   0  0  0  0  0  0  0  0  0  0  0  0
    2.4163    3.0067    1.6494 H   0  0  0  0  0  0  0  0  0  0  0  0
    3.9387    3.4820    0.9518 H   0  0  0  0  0  0  0  0  0  0  0  0
    5.7918    1.7382   -0.2934 C   0  0  0  0  0  0  0  0  0  0  0  0
    5.4511    2.4884   -1.0140 H   0  0  0  0  0  0  0  0  0  0  0  0
    6.2595    2.2185    0.5719 H   0  0  0  0  0  0  0  0  0  0  0  0
    6.5007    1.0539   -0.7711 H   0  0  0  0  0  0  0  0  0  0  0  0
    1.9982   -2.2343   -1.8573 C   0  0  0  0  0  0  0  0  0  0  0  0
    2.2960   -1.2197   -2.1366 H   0  0  0  0  0  0  0  0  0  0  0  0
    2.8254   -2.9111   -2.0913 H   0  0  0  0  0  0  0  0  0  0  0  0
    1.1652   -2.5214   -2.5007 H   0  0  0  0  0  0  0  0  0  0  0  0
    1.6671   -2.3038   -0.3925 C   0  0  0  0  0  0  0  0  0  0  0  0
    2.8278   -2.1150    0.5484 C   0  0  0  0  0  0  0  0  0  0  0  0
    3.6571   -2.7794    0.2798 H   0  0  0  0  0  0  0  0  0  0  0  0
    2.5579   -2.3451    1.5856 H   0  0  0  0  0  0  0  0  0  0  0  0
    0.4240   -2.5402    0.1157 C   0  0  0  0  0  0  0  0  0  0  0  0
    0.3187   -2.5923    1.1947 H   0  0  0  0  0  0  0  0  0  0  0  0
   -0.8578   -2.7294   -0.6422 C   0  0  0  0  0  0  0  0  0  0  0  0
   -1.2614   -3.7274   -0.4392 H   0  0  0  0  0  0  0  0  0  0  0  0
   -0.7437   -2.6412   -1.7255 H   0  0  0  0  0  0  0  0  0  0  0  0
  1  2  1  0  0  0  0
  1 13  1  0  0  0  0
  2 10  2  0  0  0  0
  3  4  2  0  0  0  0
  3  2  1  0  0  0  0
  4  5  1  0  0  0  0
  5  6  1  0  0  0  0
  5  9  2  0  0  0  0
  6  7  1  0  0  0  0
  7  8  1  0  0  0  0
  7 16  1  0  0  0  0
  8 19  1  0  0  0  0
  9  8  1  0  0  0  0
 10  9  1  0  0  0  0
 10 11  1  0  0  0  0
 11 18  1  0  0  0  0
 12  1  1  0  0  0  0
 14  3  1  0  0  0  0
 15  4  1  0  0  0  0
 17 11  1  0  0  0  0
 19 20  1  0  0  0  0
 19 22  1  0  0  0  0
 21 19  1  0  0  0  0
 23 42  1  0  0  0  0
 23 24  1  0  0  0  0
 24 29  1  0  0  0  0
 25 24  2  0  0  0  0
 25 28  1  0  0  0  0
 26 25  1  0  0  0  0
 27 26  1  0  0  0  0
 27 23  1  0  0  0  0
 28 31  1  0  0  0  0
 30 27  1  0  0  0  0
 32 28  1  0  0  0  0
 33 26  1  0  0  0  0
 33 35  1  0  0  0  0
 34 33  1  0  0  0  0
 36 33  1  0  0  0  0
 37 41  1  0  0  0  0
 38 37  1  0  0  0  0
 39 37  1  0  0  0  0
 40 37  1  0  0  0  0
 41 45  2  0  0  0  0
 41 42  1  0  0  0  0
 42 44  1  0  0  0  0
 43 42  1  0  0  0  0
 45 46  1  0  0  0  0
 47 48  1  0  0  0  0
 47  6  1  0  0  0  0
 47 45  1  0  0  0  0
 49 47  1  0  0  0  0
M  END
>  <energy_and_gap>
-15.185  4.015

$$$$
BEA_40/Syn073385/Syn073385.car
 OpenBabel12061810373D

 47 49  0  0  1  0  0  0  0  0999 V2000
    0.4703    0.6249    0.0476 N   0  0  0  0  0  0  0  0  0  0  0  0
    0.4141    1.8434    0.5283 C   0  0  1  0  0  0  0  0  0  0  0  0
   -0.4717   -0.0753    0.8030 N   0  0  0  0  0  0  0  0  0  0  0  0
   -0.4531    2.0324    1.5475 C   0  0  0  0  0  0  0  0  0  0  0  0
   -0.9594    0.7860    1.6612 C   0  0  0  0  0  0  0  0  0  0  0  0
    1.2754   -0.0018   -1.0152 C   0  0  0  0  0  0  0  0  0  0  0  0
    5.4651   -0.5531    0.0472 N   0  0  0  0  0  0  0  0  0  0  0  0
    1.1866    2.8757    0.0343 N   0  0  0  0  0  0  0  0  0  0  0  0
    2.7237   -0.1862   -0.6304 C   0  0  2  0  0  0  0  0  0  0  0  0
    5.0934    0.0532   -1.1111 C   0  0  0  0  0  0  0  0  0  0  0  0
    4.4674   -0.9827    0.8635 C   0  0  0  0  0  0  0  0  0  0  0  0
    3.7548    0.2559   -1.4942 C   0  0  0  0  0  0  0  0  0  0  0  0
    3.0985   -0.8300    0.5756 C   0  0  0  0  0  0  0  0  0  0  0  0
   -0.6856    2.9214    2.1176 H   0  0  0  0  0  0  0  0  0  0  0  0
   -1.7082    0.4622    2.3714 H   0  0  0  0  0  0  0  0  0  0  0  0
    1.1828    0.6508   -1.8904 H   0  0  0  0  0  0  0  0  0  0  0  0
    0.8434   -0.9639   -1.2965 H   0  0  0  0  0  0  0  0  0  0  0  0
    1.1413    3.8120    0.4285 H   0  0  0  0  0  0  0  0  0  0  0  0
    1.8165    2.7308   -0.7475 H   0  0  0  0  0  0  0  0  0  0  0  0
    5.8941    0.3910   -1.7628 H   0  0  0  0  0  0  0  0  0  0  0  0
    4.7691   -1.4707    1.7853 H   0  0  0  0  0  0  0  0  0  0  0  0
    3.5296    0.7452   -2.4365 H   0  0  0  0  0  0  0  0  0  0  0  0
    2.3566   -1.2024    1.2738 H   0  0  0  0  0  0  0  0  0  0  0  0
    6.8844   -0.7181    0.3570 C   0  0  0  0  0  0  0  0  0  0  0  0
    7.3522    0.2718    0.3791 H   0  0  0  0  0  0  0  0  0  0  0  0
    7.3377   -1.3426   -0.4200 H   0  0  0  0  0  0  0  0  0  0  0  0
    6.9961   -1.2013    1.3330 H   0  0  0  0  0  0  0  0  0  0  0  0
   -3.6721   -0.0761   -0.6350 C   0  0  2  0  0  0  0  0  0  0  0  0
   -4.9246    0.0160   -0.2194 N   0  0  0  0  0  0  0  0  0  0  0  0
   -5.2103   -1.1277    0.4396 C   0  0  0  0  0  0  0  0  0  0  0  0
   -4.0523   -1.9217    0.4020 C   0  0  0  0  0  0  0  0  0  0  0  0
   -3.1129   -1.2231   -0.2778 N   0  0  0  0  0  0  0  0  0  0  0  0
   -3.0225    0.9143   -1.3433 N   0  0  0  0  0  0  0  0  0  0  0  0
   -6.2041   -1.2333    0.8531 H   0  0  0  0  0  0  0  0  0  0  0  0
   -3.7789   -2.8996    0.7751 H   0  0  0  0  0  0  0  0  0  0  0  0
   -3.5014    1.7724   -1.5974 H   0  0  0  0  0  0  0  0  0  0  0  0
   -2.0571    0.8075   -1.6350 H   0  0  0  0  0  0  0  0  0  0  0  0
   -5.8801    1.1089   -0.3966 C   0  0  0  0  0  0  0  0  0  0  0  0
   -6.8324    0.8502    0.0776 H   0  0  0  0  0  0  0  0  0  0  0  0
   -5.4642    2.0077    0.0697 H   0  0  0  0  0  0  0  0  0  0  0  0
   -6.0291    1.2641   -1.4700 H   0  0  0  0  0  0  0  0  0  0  0  0
   -1.2096   -1.8453    1.5891 H   0  0  0  0  0  0  0  0  0  0  0  0
   -0.7903   -1.4981    0.6385 C   0  0  0  0  0  0  0  0  0  0  0  0
    0.1497   -2.0359    0.4889 H   0  0  0  0  0  0  0  0  0  0  0  0
   -1.7708   -1.7700   -0.5169 C   0  0  0  0  0  0  0  0  0  0  0  0
   -1.4078   -1.3517   -1.4602 H   0  0  0  0  0  0  0  0  0  0  0  0
   -1.8792   -2.8496   -0.6677 H   0  0  0  0  0  0  0  0  0  0  0  0
  1  2  1  0  0  0  0
  1  3  1  0  0  0  0
  2  8  1  1  0  0  0
  2  4  1  0  0  0  0
  3  5  1  0  0  0  0
  4  5  2  0  0  0  0
  4 14  1  0  0  0  0
  5 15  1  0  0  0  0
  6  1  1  0  0  0  0
  7 24  1  0  0  0  0
  7 11  1  0  0  0  0
  8 18  1  0  0  0  0
  9  6  1  6  0  0  0
  9 13  1  0  0  0  0
 10  7  1  0  0  0  0
 11 21  1  0  0  0  0
 12 10  2  0  0  0  0
 12  9  1  0  0  0  0
 13 11  2  0  0  0  0
 13 23  1  0  0  0  0
 16  6  1  0  0  0  0
 17  6  1  0  0  0  0
 19  8  1  0  0  0  0
 20 10  1  0  0  0  0
 22 12  1  0  0  0  0
 24 25  1  0  0  0  0
 24 27  1  0  0  0  0
 26 24  1  0  0  0  0
 28 33  1  1  0  0  0
 28 32  1  0  0  0  0
 28 29  1  0  0  0  0
 29 30  1  0  0  0  0
 30 34  1  0  0  0  0
 31 30  2  0  0  0  0
 31 35  1  0  0  0  0
 32 31  1  0  0  0  0
 36 33  1  0  0  0  0
 37 33  1  0  0  0  0
 38 29  1  0  0  0  0
 38 40  1  0  0  0  0
 38 39  1  0  0  0  0
 41 38  1  0  0  0  0
 43  3  1  0  0  0  0
 43 42  1  0  0  0  0
 44 43  1  0  0  0  0
 45 32  1  0  0  0  0
 45 43  1  0  0  0  0
 46 45  1  0  0  0  0
 47 45  1  0  0  0  0
M  END
>  <energy_and_gap>
-15.289  4.005

$$$$
BEA_40/Syn050377/Syn050377.car
 OpenBabel12061810373D

 50 52  0  0  1  0  0  0  0  0999 V2000
    2.3263    0.3027    0.3489 N   0  0  0  0  0  0  0  0  0  0  0  0
    2.0131   -0.9915    0.0476 C   0  0  0  0  0  0  0  0  0  0  0  0
    3.6387    0.4436    0.1786 C   0  0  1  0  0  0  0  0  0  0  0  0
    4.1995   -0.6901   -0.2113 N   0  0  0  0  0  0  0  0  0  0  0  0
    3.2227   -1.6121   -0.3157 C   0  0  0  0  0  0  0  0  0  0  0  0
    0.6487   -1.4967    0.1002 C   0  0  0  0  0  0  0  0  0  0  0  0
   -0.0543   -1.7636   -1.0995 C   0  0  0  0  0  0  0  0  0  0  0  0
    0.0216   -1.7593    1.3430 C   0  0  0  0  0  0  0  0  0  0  0  0
   -1.9834   -2.5327    0.1843 C   0  0  0  0  0  0  0  0  0  0  0  0
   -3.2966   -3.0424    0.2258 N   0  0  0  0  0  0  0  0  0  0  0  0
   -1.3644   -2.2767   -1.0600 C   0  0  0  0  0  0  0  0  0  0  0  0
   -1.2882   -2.2728    1.3870 C   0  0  0  0  0  0  0  0  0  0  0  0
    4.3960    1.7269    0.3894 C   0  0  0  0  0  0  0  0  0  0  0  0
    3.5089   -2.6044   -0.6385 H   0  0  0  0  0  0  0  0  0  0  0  0
    0.4070   -1.5759   -2.0645 H   0  0  0  0  0  0  0  0  0  0  0  0
    0.5442   -1.5723    2.2763 H   0  0  0  0  0  0  0  0  0  0  0  0
   -3.8045   -3.2367   -0.6331 H   0  0  0  0  0  0  0  0  0  0  0  0
   -3.7468   -3.2438    1.1148 H   0  0  0  0  0  0  0  0  0  0  0  0
   -1.8853   -2.4724   -1.9924 H   0  0  0  0  0  0  0  0  0  0  0  0
   -1.7493   -2.4664    2.3508 H   0  0  0  0  0  0  0  0  0  0  0  0
    3.9146    2.5447   -0.1546 H   0  0  0  0  0  0  0  0  0  0  0  0
    4.4203    1.9746    1.4544 H   0  0  0  0  0  0  0  0  0  0  0  0
    5.4264    1.6528    0.0324 H   0  0  0  0  0  0  0  0  0  0  0  0
    5.6037   -0.9720   -0.5059 C   0  0  0  0  0  0  0  0  0  0  0  0
    6.2016   -0.6994    0.3697 H   0  0  0  0  0  0  0  0  0  0  0  0
    5.7320   -2.0376   -0.7226 H   0  0  0  0  0  0  0  0  0  0  0  0
    5.8976   -0.3762   -1.3760 H   0  0  0  0  0  0  0  0  0  0  0  0
   -3.5018    0.7761   -0.7830 N   0  0  0  0  0  0  0  0  0  0  0  0
   -3.5566    0.6907    0.5622 C   0  0  0  0  0  0  0  0  0  0  0  0
   -2.4592    1.4288    1.0442 C   0  0  0  0  0  0  0  0  0  0  0  0
   -1.7957    1.9361   -0.0194 N   0  0  0  0  0  0  0  0  0  0  0  0
   -2.4550    1.5196   -1.0859 C   0  0  0  0  0  0  0  0  0  0  0  0
   -2.1272    1.5980    2.3703 N   0  0  0  0  0  0  0  0  0  0  0  0
   -4.3651    0.1122    0.9894 H   0  0  0  0  0  0  0  0  0  0  0  0
   -2.1708    1.7605   -2.1027 H   0  0  0  0  0  0  0  0  0  0  0  0
   -2.6831    1.1772    3.1098 H   0  0  0  0  0  0  0  0  0  0  0  0
   -1.3195    2.1493    2.6412 H   0  0  0  0  0  0  0  0  0  0  0  0
   -4.4089    0.1817   -1.7582 C   0  0  0  0  0  0  0  0  0  0  0  0
   -5.0130    0.9827   -2.1963 H   0  0  0  0  0  0  0  0  0  0  0  0
   -3.8144   -0.3204   -2.5285 H   0  0  0  0  0  0  0  0  0  0  0  0
   -5.0526   -0.5451   -1.2524 H   0  0  0  0  0  0  0  0  0  0  0  0
   -0.6086    2.7889   -0.1167 C   0  0  0  0  0  0  0  0  0  0  0  0
   -0.5125    3.3412    0.8236 H   0  0  0  0  0  0  0  0  0  0  0  0
   -0.7990    3.5354   -0.8972 H   0  0  0  0  0  0  0  0  0  0  0  0
    0.6353    1.9842   -0.3882 C   0  0  1  0  0  0  0  0  0  0  0  0
    1.1089    1.8956   -1.5791 N   0  0  0  0  0  0  0  0  0  0  0  0
    0.5297    2.3891   -2.2692 H   0  0  0  0  0  0  0  0  0  0  0  0
    1.4010    1.3760    0.7571 C   0  0  0  0  0  0  0  0  0  0  0  0
    1.9695    2.1517    1.2794 H   0  0  0  0  0  0  0  0  0  0  0  0
    0.7178    0.9510    1.4974 H   0  0  0  0  0  0  0  0  0  0  0  0
  1 48  1  0  0  0  0
  2  6  1  0  0  0  0
  2  1  1  0  0  0  0
  3  1  1  0  0  0  0
  3 13  1  6  0  0  0
  4  3  1  0  0  0  0
  5  4  1  0  0  0  0
  5  2  2  0  0  0  0
  6  8  2  0  0  0  0
  7 11  2  0  0  0  0
  7  6  1  0  0  0  0
  8 12  1  0  0  0  0
  8 16  1  0  0  0  0
  9 10  1  0  0  0  0
  9 12  2  0  0  0  0
 10 18  1  0  0  0  0
 11  9  1  0  0  0  0
 12 20  1  0  0  0  0
 13 22  1  0  0  0  0
 14  5  1  0  0  0  0
 15  7  1  0  0  0  0
 17 10  1  0  0  0  0
 19 11  1  0  0  0  0
 21 13  1  0  0  0  0
 23 13  1  0  0  0  0
 24  4  1  0  0  0  0
 24 25  1  0  0  0  0
 26 24  1  0  0  0  0
 27 24  1  0  0  0  0
 28 29  1  0  0  0  0
 29 34  1  0  0  0  0
 29 30  2  0  0  0  0
 30 33  1  0  0  0  0
 31 30  1  0  0  0  0
 32 28  1  0  0  0  0
 32 31  1  0  0  0  0
 33 37  1  0  0  0  0
 33 36  1  0  0  0  0
 35 32  1  0  0  0  0
 38 41  1  0  0  0  0
 38 28  1  0  0  0  0
 39 38  1  0  0  0  0
 40 38  1  0  0  0  0
 42 31  1  0  0  0  0
 42 43  1  0  0  0  0
 44 42  1  0  0  0  0
 45 46  1  1  0  0  0
 45 42  1  0  0  0  0
 45 48  1  0  0  0  0
 47 46  1  0  0  0  0
 48 49  1  0  0  0  0
 48 50  1  0  0  0  0
M  RAD  2  45   2  46   2
M  END
>  <energy_and_gap>
-15.669  3.962

$$$$
BEA_40/Syn070892/Syn070892.car
 OpenBabel12061810373D

 47 50  0  0  1  0  0  0  0  0999 V2000
   -2.5988   -0.0612    0.0117 C   0  0  0  0  0  0  0  0  0  0  0  0
   -3.5146    0.9666    0.0108 C   0  0  0  0  0  0  0  0  0  0  0  0
   -4.8817    0.7332   -0.0436 C   0  0  0  0  0  0  0  0  0  0  0  0
   -5.2427   -0.6198   -0.0595 C   0  0  0  0  0  0  0  0  0  0  0  0
   -4.2394   -1.6243   -0.0748 C   0  0  1  0  0  0  0  0  0  0  0  0
   -2.8650   -1.3799   -0.0985 N   0  0  0  0  0  0  0  0  0  0  0  0
   -1.5997    1.7747    0.1339 C   0  0  0  0  0  0  0  0  0  0  0  0
   -1.3986    0.4689    0.1364 N   0  0  0  0  0  0  0  0  0  0  0  0
   -2.8671    2.0823    0.0698 N   0  0  0  0  0  0  0  0  0  0  0  0
   -4.7242   -2.9548   -0.0499 N   0  0  0  0  0  0  0  0  0  0  0  0
   -5.6228    1.5261   -0.0384 H   0  0  0  0  0  0  0  0  0  0  0  0
   -6.2981   -0.8768   -0.0596 H   0  0  0  0  0  0  0  0  0  0  0  0
   -0.8201    2.5248    0.1789 H   0  0  0  0  0  0  0  0  0  0  0  0
   -5.7128   -3.1521   -0.1844 H   0  0  0  0  0  0  0  0  0  0  0  0
   -4.1197   -3.7328    0.1913 H   0  0  0  0  0  0  0  0  0  0  0  0
   -1.8974   -2.4707   -0.2928 C   0  0  0  0  0  0  0  0  0  0  0  0
   -1.0711   -2.1158   -0.9121 H   0  0  0  0  0  0  0  0  0  0  0  0
   -2.3540   -3.2950   -0.8464 H   0  0  0  0  0  0  0  0  0  0  0  0
   -1.5535   -2.8110    0.6890 H   0  0  0  0  0  0  0  0  0  0  0  0
   -3.3803    3.4523    0.0741 C   0  0  0  0  0  0  0  0  0  0  0  0
   -2.5458    4.1609    0.1065 H   0  0  0  0  0  0  0  0  0  0  0  0
   -3.9625    3.6062   -0.8404 H   0  0  0  0  0  0  0  0  0  0  0  0
   -4.0124    3.5809    0.9589 H   0  0  0  0  0  0  0  0  0  0  0  0
    3.2296    0.3005   -0.0594 N   0  0  0  0  0  0  0  0  0  0  0  0
    3.6372   -0.9394    0.3040 C   0  0  0  0  0  0  0  0  0  0  0  0
    5.0407   -0.9388    0.2046 C   0  0  0  0  0  0  0  0  0  0  0  0
    5.4276    0.2851   -0.2097 N   0  0  0  0  0  0  0  0  0  0  0  0
    4.3207    0.9880   -0.3537 C   0  0  0  0  0  0  0  0  0  0  0  0
    5.8714   -2.0014    0.4820 N   0  0  0  0  0  0  0  0  0  0  0  0
    2.8726   -1.6517    0.5837 H   0  0  0  0  0  0  0  0  0  0  0  0
    4.3133    2.0209   -0.6795 H   0  0  0  0  0  0  0  0  0  0  0  0
    6.8778   -1.9124    0.3827 H   0  0  0  0  0  0  0  0  0  0  0  0
    5.5010   -2.8957    0.7914 H   0  0  0  0  0  0  0  0  0  0  0  0
    6.7750    0.7872   -0.4636 C   0  0  0  0  0  0  0  0  0  0  0  0
    7.3488    0.7131    0.4657 H   0  0  0  0  0  0  0  0  0  0  0  0
    6.7233    1.8310   -0.7902 H   0  0  0  0  0  0  0  0  0  0  0  0
    7.2280    0.1713   -1.2470 H   0  0  0  0  0  0  0  0  0  0  0  0
    1.8891    0.8977   -0.1531 C   0  0  1  0  0  0  0  0  0  0  0  0
    1.9598    1.9364   -0.4979 H   0  0  0  0  0  0  0  0  0  0  0  0
    0.8628    0.0763   -0.9622 C   0  0  0  0  0  0  0  0  0  0  0  0
    0.4002    0.6500   -1.7720 H   0  0  0  0  0  0  0  0  0  0  0  0
    1.2371   -0.8844   -1.3301 H   0  0  0  0  0  0  0  0  0  0  0  0
   -0.0206   -0.0581    0.2968 C   0  0  1  0  0  0  0  0  0  0  0  0
   -0.0645   -1.0749    0.6918 H   0  0  0  0  0  0  0  0  0  0  0  0
    1.0195    0.7519    1.1133 C   0  0  0  0  0  0  0  0  0  0  0  0
    0.6738    1.7066    1.5183 H   0  0  0  0  0  0  0  0  0  0  0  0
    1.4898    0.1588    1.9044 H   0  0  0  0  0  0  0  0  0  0  0  0
  1  8  1  0  0  0  0
  2  1  2  0  0  0  0
  2  9  1  0  0  0  0
  3 11  1  0  0  0  0
  3  2  1  0  0  0  0
  4  3  2  0  0  0  0
  5  4  1  0  0  0  0
  5 10  1  1  0  0  0
  6  5  1  0  0  0  0
  6  1  1  0  0  0  0
  7  8  1  0  0  0  0
  7 13  1  0  0  0  0
  8 43  1  0  0  0  0
  9 20  1  0  0  0  0
  9  7  1  0  0  0  0
 10 15  1  0  0  0  0
 12  4  1  0  0  0  0
 14 10  1  0  0  0  0
 16  6  1  0  0  0  0
 16 19  1  0  0  0  0
 17 16  1  0  0  0  0
 18 16  1  0  0  0  0
 20 21  1  0  0  0  0
 20 23  1  0  0  0  0
 22 20  1  0  0  0  0
 24 25  1  0  0  0  0
 25 30  1  0  0  0  0
 26 25  2  0  0  0  0
 26 29  1  0  0  0  0
 27 26  1  0  0  0  0
 28 27  1  0  0  0  0
 28 24  1  0  0  0  0
 29 33  1  0  0  0  0
 31 28  1  0  0  0  0
 32 29  1  0  0  0  0
 34 27  1  0  0  0  0
 34 35  1  0  0  0  0
 36 34  1  0  0  0  0
 37 34  1  0  0  0  0
 38 39  1  6  0  0  0
 38 24  1  0  0  0  0
 38 45  1  0  0  0  0
 40 38  1  0  0  0  0
 40 43  1  0  0  0  0
 41 40  1  0  0  0  0
 42 40  1  0  0  0  0
 43 44  1  1  0  0  0
 43 45  1  0  0  0  0
 45 46  1  0  0  0  0
 45 47  1  0  0  0  0
M  END
>  <energy_and_gap>
-15.276  3.901

$$$$
BEA_40/Syn051425/Syn051425.car
 OpenBabel12061810373D

 52 54  0  0  1  0  0  0  0  0999 V2000
   -5.7045    0.6320    0.9436 N   0  0  0  0  0  0  0  0  0  0  0  0
   -4.5405    0.0408    0.3979 C   0  0  0  0  0  0  0  0  0  0  0  0
   -4.4322   -1.3417    0.2235 N   0  0  0  0  0  0  0  0  0  0  0  0
   -3.2307   -1.8783   -0.2433 C   0  0  2  0  0  0  0  0  0  0  0  0
   -3.0633   -3.2818   -0.3391 N   0  0  0  0  0  0  0  0  0  0  0  0
   -2.1005   -1.1135   -0.6307 C   0  0  0  0  0  0  0  0  0  0  0  0
   -2.2571    0.2529   -0.4779 C   0  0  0  0  0  0  0  0  0  0  0  0
   -3.4444    0.8355    0.0322 C   0  0  0  0  0  0  0  0  0  0  0  0
   -3.2160    2.1802    0.0639 N   0  0  0  0  0  0  0  0  0  0  0  0
   -2.0022    2.3835   -0.4032 C   0  0  0  0  0  0  0  0  0  0  0  0
   -1.3962    1.2670   -0.7359 N   0  0  0  0  0  0  0  0  0  0  0  0
   -6.3474    0.0879    1.5090 H   0  0  0  0  0  0  0  0  0  0  0  0
   -5.9124    1.6152    0.8107 H   0  0  0  0  0  0  0  0  0  0  0  0
   -3.7100   -3.9238    0.1064 H   0  0  0  0  0  0  0  0  0  0  0  0
   -2.2456   -3.6800   -0.7942 H   0  0  0  0  0  0  0  0  0  0  0  0
   -1.1806   -1.5560   -1.0002 H   0  0  0  0  0  0  0  0  0  0  0  0
   -1.5402    3.3586   -0.5025 H   0  0  0  0  0  0  0  0  0  0  0  0
   -5.5896   -2.2149    0.4993 C   0  0  0  0  0  0  0  0  0  0  0  0
   -6.5267   -1.6720    0.3525 H   0  0  0  0  0  0  0  0  0  0  0  0
   -5.5097   -2.5782    1.5289 H   0  0  0  0  0  0  0  0  0  0  0  0
   -5.6080   -3.0482   -0.2086 H   0  0  0  0  0  0  0  0  0  0  0  0
   -4.0069    3.3354    0.4897 C   0  0  0  0  0  0  0  0  0  0  0  0
   -3.4084    4.2516    0.4396 H   0  0  0  0  0  0  0  0  0  0  0  0
   -4.3272    3.1698    1.5230 H   0  0  0  0  0  0  0  0  0  0  0  0
   -4.8695    3.4232   -0.1783 H   0  0  0  0  0  0  0  0  0  0  0  0
    5.9440    0.8531    0.1541 N   0  0  0  0  0  0  0  0  0  0  0  0
    6.2826   -0.4505    0.0724 C   0  0  0  0  0  0  0  0  0  0  0  0
    5.1118   -1.1759    0.3647 C   0  0  0  0  0  0  0  0  0  0  0  0
    4.1192   -0.2894    0.6074 N   0  0  0  0  0  0  0  0  0  0  0  0
    4.6645    0.9065    0.4718 C   0  0  0  0  0  0  0  0  0  0  0  0
    5.0030   -2.5489    0.3897 N   0  0  0  0  0  0  0  0  0  0  0  0
    7.3086   -0.6811   -0.1825 H   0  0  0  0  0  0  0  0  0  0  0  0
    4.1222    1.8343    0.6056 H   0  0  0  0  0  0  0  0  0  0  0  0
    4.1174   -2.9991    0.5967 H   0  0  0  0  0  0  0  0  0  0  0  0
    5.8040   -3.1444    0.1979 H   0  0  0  0  0  0  0  0  0  0  0  0
    6.7899    2.0221   -0.0582 C   0  0  0  0  0  0  0  0  0  0  0  0
    6.3684    2.6091   -0.8808 H   0  0  0  0  0  0  0  0  0  0  0  0
    7.8020    1.6918   -0.3130 H   0  0  0  0  0  0  0  0  0  0  0  0
    6.8079    2.6082    0.8665 H   0  0  0  0  0  0  0  0  0  0  0  0
    1.8576   -1.2949   -1.2866 C   0  0  0  0  0  0  0  0  0  0  0  0
    2.8366   -1.2803   -1.7733 H   0  0  0  0  0  0  0  0  0  0  0  0
    1.1076   -1.1602   -2.0670 H   0  0  0  0  0  0  0  0  0  0  0  0
    1.7006   -2.2904   -0.8610 H   0  0  0  0  0  0  0  0  0  0  0  0
    1.7879   -0.2504   -0.2072 C   0  0  0  0  0  0  0  0  0  0  0  0
    2.7087   -0.4625    0.9673 C   0  0  0  0  0  0  0  0  0  0  0  0
    2.5820   -1.4687    1.3797 H   0  0  0  0  0  0  0  0  0  0  0  0
    2.4970    0.2361    1.7853 H   0  0  0  0  0  0  0  0  0  0  0  0
    0.9527    0.8275   -0.2166 C   0  0  0  0  0  0  0  0  0  0  0  0
    0.9990    1.5109    0.6253 H   0  0  0  0  0  0  0  0  0  0  0  0
   -0.0356    1.2153   -1.2766 C   0  0  0  0  0  0  0  0  0  0  0  0
   -0.0550    0.5340   -2.1306 H   0  0  0  0  0  0  0  0  0  0  0  0
    0.2158    2.2077   -1.6666 H   0  0  0  0  0  0  0  0  0  0  0  0
  1 12  1  0  0  0  0
  2  1  1  0  0  0  0
  3  2  1  0  0  0  0
  3 18  1  0  0  0  0
  4  5  1  1  0  0  0
  4  3  1  0  0  0  0
  5 14  1  0  0  0  0
  6  7  2  0  0  0  0
  6  4  1  0  0  0  0
  7  8  1  0  0  0  0
  8  9  1  0  0  0  0
  8  2  2  0  0  0  0
  9 22  1  0  0  0  0
 10  9  1  0  0  0  0
 11  7  1  0  0  0  0
 11 10  1  0  0  0  0
 13  1  1  0  0  0  0
 15  5  1  0  0  0  0
 16  6  1  0  0  0  0
 17 10  1  0  0  0  0
 18 20  1  0  0  0  0
 19 18  1  0  0  0  0
 21 18  1  0  0  0  0
 22 24  1  0  0  0  0
 23 22  1  0  0  0  0
 25 22  1  0  0  0  0
 26 30  1  0  0  0  0
 27 26  1  0  0  0  0
 27 28  2  0  0  0  0
 28 31  1  0  0  0  0
 28 29  1  0  0  0  0
 29 45  1  0  0  0  0
 30 33  1  0  0  0  0
 30 29  1  0  0  0  0
 31 34  1  0  0  0  0
 32 27  1  0  0  0  0
 35 31  1  0  0  0  0
 36 26  1  0  0  0  0
 36 39  1  0  0  0  0
 37 36  1  0  0  0  0
 38 36  1  0  0  0  0
 40 43  1  0  0  0  0
 40 44  1  0  0  0  0
 41 40  1  0  0  0  0
 42 40  1  0  0  0  0
 44 45  1  0  0  0  0
 45 46  1  0  0  0  0
 45 47  1  0  0  0  0
 48 44  2  0  0  0  0
 48 49  1  0  0  0  0
 50 11  1  0  0  0  0
 50 48  1  0  0  0  0
 51 50  1  0  0  0  0
 52 50  1  0  0  0  0
M  END
>  <energy_and_gap>
-15.115  3.899

$$$$
BEA_40/Syn095751/Syn095751.car
 OpenBabel12061810373D

 51 54  0  0  1  0  0  0  0  0999 V2000
   -3.7919   -1.0777   -0.3434 N   0  0  0  0  0  0  0  0  0  0  0  0
   -3.1790   -2.2366   -0.3768 C   0  0  2  0  0  0  0  0  0  0  0  0
   -4.6034   -1.1660    0.7859 N   0  0  0  0  0  0  0  0  0  0  0  0
   -3.4894   -3.0935    0.6216 C   0  0  0  0  0  0  0  0  0  0  0  0
   -3.7769    0.1209   -1.1988 C   0  0  0  0  0  0  0  0  0  0  0  0
   -4.3848   -2.3476    1.3029 C   0  0  0  0  0  0  0  0  0  0  0  0
   -0.6150    1.9663   -0.0464 N   0  0  0  0  0  0  0  0  0  0  0  0
   -2.8757    1.2132   -0.6777 C   0  0  0  0  0  0  0  0  0  0  0  0
   -2.2690   -2.5724   -1.3601 N   0  0  0  0  0  0  0  0  0  0  0  0
   -1.4845    1.0169   -0.5025 C   0  0  0  0  0  0  0  0  0  0  0  0
   -1.1541    3.1837    0.2466 C   0  0  0  0  0  0  0  0  0  0  0  0
   -3.3841    2.4959   -0.3691 C   0  0  0  0  0  0  0  0  0  0  0  0
   -2.5166    3.4957    0.1030 C   0  0  0  0  0  0  0  0  0  0  0  0
   -3.1335   -4.0937    0.8272 H   0  0  0  0  0  0  0  0  0  0  0  0
   -4.8094    0.4667   -1.3075 H   0  0  0  0  0  0  0  0  0  0  0  0
   -3.4505   -0.1796   -2.1993 H   0  0  0  0  0  0  0  0  0  0  0  0
   -4.9129   -2.6405    2.2004 H   0  0  0  0  0  0  0  0  0  0  0  0
   -2.0586   -1.9367   -2.1219 H   0  0  0  0  0  0  0  0  0  0  0  0
   -1.8002   -3.4749   -1.3655 H   0  0  0  0  0  0  0  0  0  0  0  0
   -1.0467    0.0535   -0.7424 H   0  0  0  0  0  0  0  0  0  0  0  0
   -0.4779    3.9519    0.6100 H   0  0  0  0  0  0  0  0  0  0  0  0
   -4.4395    2.7188   -0.4908 H   0  0  0  0  0  0  0  0  0  0  0  0
   -2.8889    4.4847    0.3483 H   0  0  0  0  0  0  0  0  0  0  0  0
   -5.4980   -0.1006    1.2332 C   0  0  0  0  0  0  0  0  0  0  0  0
   -6.0603   -0.4551    2.1028 H   0  0  0  0  0  0  0  0  0  0  0  0
   -4.8934    0.7654    1.5148 H   0  0  0  0  0  0  0  0  0  0  0  0
   -6.1914    0.1403    0.4224 H   0  0  0  0  0  0  0  0  0  0  0  0
    3.4706   -0.1518   -0.0472 N   0  0  0  0  0  0  0  0  0  0  0  0
    4.4053    0.7131    0.4154 C   0  0  0  0  0  0  0  0  0  0  0  0
    5.6306    0.0222    0.3877 C   0  0  0  0  0  0  0  0  0  0  0  0
    5.3972   -1.2195   -0.0846 N   0  0  0  0  0  0  0  0  0  0  0  0
    4.1025   -1.2788   -0.3298 C   0  0  0  0  0  0  0  0  0  0  0  0
    6.8522    0.5264    0.7748 N   0  0  0  0  0  0  0  0  0  0  0  0
    4.0700    1.7013    0.7005 H   0  0  0  0  0  0  0  0  0  0  0  0
    3.6137   -2.1620   -0.7222 H   0  0  0  0  0  0  0  0  0  0  0  0
    7.6896   -0.0451    0.7212 H   0  0  0  0  0  0  0  0  0  0  0  0
    6.9460    1.4770    1.1215 H   0  0  0  0  0  0  0  0  0  0  0  0
    6.3396   -2.3135   -0.3018 C   0  0  0  0  0  0  0  0  0  0  0  0
    7.0943   -1.9779   -1.0202 H   0  0  0  0  0  0  0  0  0  0  0  0
    6.8037   -2.5614    0.6581 H   0  0  0  0  0  0  0  0  0  0  0  0
    5.8071   -3.1848   -0.6969 H   0  0  0  0  0  0  0  0  0  0  0  0
    2.0214   -0.0033   -0.2477 C   0  0  2  0  0  0  0  0  0  0  0  0
    1.5939   -0.9355   -0.6362 H   0  0  0  0  0  0  0  0  0  0  0  0
    1.6052    1.2326   -1.0731 C   0  0  0  0  0  0  0  0  0  0  0  0
    2.4392    1.8719   -1.3802 H   0  0  0  0  0  0  0  0  0  0  0  0
    0.9721    0.9838   -1.9307 H   0  0  0  0  0  0  0  0  0  0  0  0
    0.8374    1.7828    0.1481 C   0  0  2  0  0  0  0  0  0  0  0  0
    1.2927    2.7009    0.5379 H   0  0  0  0  0  0  0  0  0  0  0  0
    1.2487    0.5430    0.9717 C   0  0  0  0  0  0  0  0  0  0  0  0
    1.8790    0.7886    1.8323 H   0  0  0  0  0  0  0  0  0  0  0  0
    0.4138   -0.0970    1.2742 H   0  0  0  0  0  0  0  0  0  0  0  0
  1  3  1  0  0  0  0
  2  9  1  1  0  0  0
  2  1  1  0  0  0  0
  2  4  1  0  0  0  0
  3 24  1  0  0  0  0
  3  6  1  0  0  0  0
  4 14  1  0  0  0  0
  4  6  2  0  0  0  0
  5  8  1  0  0  0  0
  5  1  1  0  0  0  0
  6 17  1  0  0  0  0
  7 47  1  0  0  0  0
  7 11  1  0  0  0  0
  8 10  2  0  0  0  0
  8 12  1  0  0  0  0
 10  7  1  0  0  0  0
 11 21  1  0  0  0  0
 12 13  1  0  0  0  0
 13 11  2  0  0  0  0
 13 23  1  0  0  0  0
 15  5  1  0  0  0  0
 16  5  1  0  0  0  0
 18  9  1  0  0  0  0
 19  9  1  0  0  0  0
 20 10  1  0  0  0  0
 22 12  1  0  0  0  0
 24 26  1  0  0  0  0
 24 25  1  0  0  0  0
 27 24  1  0  0  0  0
 28 29  1  0  0  0  0
 29 34  1  0  0  0  0
 30 29  2  0  0  0  0
 30 33  1  0  0  0  0
 31 30  1  0  0  0  0
 32 31  1  0  0  0  0
 32 28  1  0  0  0  0
 33 37  1  0  0  0  0
 35 32  1  0  0  0  0
 36 33  1  0  0  0  0
 38 31  1  0  0  0  0
 38 40  1  0  0  0  0
 39 38  1  0  0  0  0
 41 38  1  0  0  0  0
 42 43  1  6  0  0  0
 42 28  1  0  0  0  0
 42 49  1  0  0  0  0
 44 42  1  0  0  0  0
 44 47  1  0  0  0  0
 45 44  1  0  0  0  0
 46 44  1  0  0  0  0
 47 48  1  1  0  0  0
 47 49  1  0  0  0  0
 49 51  1  0  0  0  0
 49 50  1  0  0  0  0
M  END
>  <energy_and_gap>
-15.685  3.829

$$$$
BEA_40/Syn054257/Syn054257.car
 OpenBabel12061810373D

 55 57  0  0  1  0  0  0  0  0999 V2000
   -1.8972    1.2243   -1.9691 N   0  0  0  0  0  0  0  0  0  0  0  0
   -2.8130    0.5943   -1.0962 C   0  0  0  0  0  0  0  0  0  0  0  0
   -4.1061    1.0916   -0.9151 N   0  0  0  0  0  0  0  0  0  0  0  0
   -4.9969    0.3968   -0.0946 C   0  0  1  0  0  0  0  0  0  0  0  0
   -6.3385    0.8331    0.0362 N   0  0  0  0  0  0  0  0  0  0  0  0
   -4.6724   -0.7712    0.6417 C   0  0  0  0  0  0  0  0  0  0  0  0
   -3.3746   -1.2155    0.4599 C   0  0  0  0  0  0  0  0  0  0  0  0
   -2.4496   -0.5650   -0.3956 C   0  0  0  0  0  0  0  0  0  0  0  0
   -1.3036   -1.3081   -0.3406 N   0  0  0  0  0  0  0  0  0  0  0  0
   -1.5257   -2.3033    0.4955 C   0  0  0  0  0  0  0  0  0  0  0  0
   -2.7390   -2.2840    0.9916 N   0  0  0  0  0  0  0  0  0  0  0  0
   -0.8973    1.1665   -1.8134 H   0  0  0  0  0  0  0  0  0  0  0  0
   -2.2266    1.7614   -2.7645 H   0  0  0  0  0  0  0  0  0  0  0  0
   -6.9613    0.4071    0.7182 H   0  0  0  0  0  0  0  0  0  0  0  0
   -6.7340    1.5268   -0.5891 H   0  0  0  0  0  0  0  0  0  0  0  0
   -5.3799   -1.2901    1.2823 H   0  0  0  0  0  0  0  0  0  0  0  0
   -0.7964   -3.0627    0.7523 H   0  0  0  0  0  0  0  0  0  0  0  0
   -4.5147    2.3576   -1.5546 C   0  0  0  0  0  0  0  0  0  0  0  0
   -3.6467    2.9883   -1.7612 H   0  0  0  0  0  0  0  0  0  0  0  0
   -5.1522    2.9285   -0.8734 H   0  0  0  0  0  0  0  0  0  0  0  0
   -5.0459    2.1194   -2.4817 H   0  0  0  0  0  0  0  0  0  0  0  0
   -3.2674   -3.2648    1.9364 C   0  0  0  0  0  0  0  0  0  0  0  0
   -2.4864   -3.9890    2.1911 H   0  0  0  0  0  0  0  0  0  0  0  0
   -3.5921   -2.7347    2.8376 H   0  0  0  0  0  0  0  0  0  0  0  0
   -4.1122   -3.7765    1.4640 H   0  0  0  0  0  0  0  0  0  0  0  0
    4.5700   -0.4216    0.2041 C   0  0  1  0  0  0  0  0  0  0  0  0
    5.4882   -0.3422   -0.7458 N   0  0  0  0  0  0  0  0  0  0  0  0
    4.9871   -0.9590   -1.8370 C   0  0  0  0  0  0  0  0  0  0  0  0
    3.7070   -1.4218   -1.4936 C   0  0  0  0  0  0  0  0  0  0  0  0
    3.4826   -1.0592   -0.2084 N   0  0  0  0  0  0  0  0  0  0  0  0
    4.7398    0.0951    1.4724 N   0  0  0  0  0  0  0  0  0  0  0  0
    5.6072   -0.9940   -2.7225 H   0  0  0  0  0  0  0  0  0  0  0  0
    2.9259   -1.9662   -2.0064 H   0  0  0  0  0  0  0  0  0  0  0  0
    5.6062    0.5515    1.7386 H   0  0  0  0  0  0  0  0  0  0  0  0
    3.9970    0.0522    2.1616 H   0  0  0  0  0  0  0  0  0  0  0  0
    6.8139    0.2742   -0.7051 C   0  0  0  0  0  0  0  0  0  0  0  0
    7.3021    0.1712   -1.6796 H   0  0  0  0  0  0  0  0  0  0  0  0
    7.4051   -0.2341    0.0634 H   0  0  0  0  0  0  0  0  0  0  0  0
    6.6924    1.3344   -0.4606 H   0  0  0  0  0  0  0  0  0  0  0  0
    0.3049    3.2514    0.7045 N   0  0  0  0  0  0  0  0  0  0  0  0
    0.1442    4.2325    0.9171 H   0  0  0  0  0  0  0  0  0  0  0  0
   -0.3712    2.8410    0.0690 H   0  0  0  0  0  0  0  0  0  0  0  0
    1.3674    2.5321    1.2406 C   0  0  0  0  0  0  0  0  0  0  0  0
    2.1979    3.2377    2.0875 N   0  0  0  0  0  0  0  0  0  0  0  0
    3.0022    2.8015    2.5300 H   0  0  0  0  0  0  0  0  0  0  0  0
    2.0579    4.2184    2.3159 H   0  0  0  0  0  0  0  0  0  0  0  0
    1.6435    1.1980    0.9926 N   0  0  0  0  0  0  0  0  0  0  0  0
    0.8473    0.6491    0.2173 N   0  0  0  0  0  0  0  0  0  0  0  0
    1.0438   -0.5991   -0.0643 C   0  0  0  0  0  0  0  0  0  0  0  0
    2.2193   -1.4064    0.4580 C   0  0  0  0  0  0  0  0  0  0  0  0
    2.0614   -2.4798    0.3048 H   0  0  0  0  0  0  0  0  0  0  0  0
    2.3445   -1.2737    1.5371 H   0  0  0  0  0  0  0  0  0  0  0  0
    0.0305   -1.2653   -0.9560 C   0  0  0  0  0  0  0  0  0  0  0  0
    0.3252   -2.2941   -1.1955 H   0  0  0  0  0  0  0  0  0  0  0  0
   -0.0495   -0.7541   -1.9184 H   0  0  0  0  0  0  0  0  0  0  0  0
  1 12  1  0  0  0  0
  1  2  1  0  0  0  0
  2  3  1  0  0  0  0
  2  8  2  0  0  0  0
  3  4  1  0  0  0  0
  4  5  1  6  0  0  0
  4  6  1  0  0  0  0
  5 14  1  0  0  0  0
  6 16  1  0  0  0  0
  7  6  2  0  0  0  0
  7 11  1  0  0  0  0
  8  9  1  0  0  0  0
  8  7  1  0  0  0  0
  9 10  1  0  0  0  0
 10 17  1  0  0  0  0
 10 11  1  0  0  0  0
 11 22  1  0  0  0  0
 13  1  1  0  0  0  0
 15  5  1  0  0  0  0
 18  3  1  0  0  0  0
 18 20  1  0  0  0  0
 19 18  1  0  0  0  0
 21 18  1  0  0  0  0
 22 23  1  0  0  0  0
 22 24  1  0  0  0  0
 25 22  1  0  0  0  0
 26 31  1  1  0  0  0
 27 36  1  0  0  0  0
 27 26  1  0  0  0  0
 28 29  2  0  0  0  0
 28 27  1  0  0  0  0
 29 30  1  0  0  0  0
 30 26  1  0  0  0  0
 30 50  1  0  0  0  0
 31 34  1  0  0  0  0
 31 35  1  0  0  0  0
 32 28  1  0  0  0  0
 33 29  1  0  0  0  0
 36 39  1  0  0  0  0
 36 38  1  0  0  0  0
 37 36  1  0  0  0  0
 40 41  1  0  0  0  0
 40 43  2  0  0  0  0
 42 40  1  0  0  0  0
 43 44  1  0  0  0  0
 44 46  1  0  0  0  0
 44 45  1  0  0  0  0
 47 43  1  0  0  0  0
 48 47  1  0  0  0  0
 49 48  2  0  0  0  0
 49 50  1  0  0  0  0
 50 52  1  0  0  0  0
 51 50  1  0  0  0  0
 53  9  1  0  0  0  0
 53 49  1  0  0  0  0
 54 53  1  0  0  0  0
 55 53  1  0  0  0  0
M  RAD  1  47   2
M  END
>  <energy_and_gap>
-15.204  3.795

$$$$
BEA_40/Syn094983/Syn094983.car
 OpenBabel12061810373D

 53 56  0  0  1  0  0  0  0  0999 V2000
   -2.7967   -2.8902    0.5569 N   0  0  0  0  0  0  0  0  0  0  0  0
   -2.4789   -1.6420    0.0491 C   0  0  2  0  0  0  0  0  0  0  0  0
   -1.5133   -1.4455   -0.8360 N   0  0  0  0  0  0  0  0  0  0  0  0
   -1.4516   -0.1095   -1.0788 C   0  0  0  0  0  0  0  0  0  0  0  0
   -0.6217    0.6242   -1.9202 C   0  0  0  0  0  0  0  0  0  0  0  0
   -0.8412    2.0177   -1.8634 C   0  0  0  0  0  0  0  0  0  0  0  0
   -0.0636    2.8837   -2.6586 N   0  0  0  0  0  0  0  0  0  0  0  0
   -1.8402    2.5414   -1.0006 C   0  0  0  0  0  0  0  0  0  0  0  0
   -2.6674    1.8255   -0.1642 N   0  0  0  0  0  0  0  0  0  0  0  0
   -2.4366    0.5138   -0.2537 C   0  0  0  0  0  0  0  0  0  0  0  0
   -3.0668   -0.5063    0.4088 N   0  0  0  0  0  0  0  0  0  0  0  0
   -2.3487   -3.7322    0.2117 H   0  0  0  0  0  0  0  0  0  0  0  0
   -3.4724   -3.0116    1.3032 H   0  0  0  0  0  0  0  0  0  0  0  0
    0.1318    0.1735   -2.5583 H   0  0  0  0  0  0  0  0  0  0  0  0
    0.6553    2.5167   -3.2772 H   0  0  0  0  0  0  0  0  0  0  0  0
   -0.2093    3.8897   -2.6283 H   0  0  0  0  0  0  0  0  0  0  0  0
   -1.9800    3.6196   -0.9837 H   0  0  0  0  0  0  0  0  0  0  0  0
   -3.6093    2.5992    0.6507 C   0  0  0  0  0  0  0  0  0  0  0  0
   -4.6166    2.4394    0.2543 H   0  0  0  0  0  0  0  0  0  0  0  0
   -3.5347    2.2594    1.6874 H   0  0  0  0  0  0  0  0  0  0  0  0
   -3.3683    3.6667    0.6181 H   0  0  0  0  0  0  0  0  0  0  0  0
   -4.1871   -0.3753    1.3481 C   0  0  0  0  0  0  0  0  0  0  0  0
   -4.9321    0.2992    0.9192 H   0  0  0  0  0  0  0  0  0  0  0  0
   -4.6736   -1.3394    1.5104 H   0  0  0  0  0  0  0  0  0  0  0  0
   -3.7984    0.0102    2.2957 H   0  0  0  0  0  0  0  0  0  0  0  0
    0.4925    0.5806    3.7309 N   0  0  0  0  0  0  0  0  0  0  0  0
    1.2390    0.3419    2.5583 C   0  0  0  0  0  0  0  0  0  0  0  0
    2.3221    1.1923    2.2319 C   0  0  0  0  0  0  0  0  0  0  0  0
    3.0904    0.9792    1.0588 C   0  0  0  0  0  0  0  0  0  0  0  0
    4.1637    1.8459    0.7655 N   0  0  0  0  0  0  0  0  0  0  0  0
    2.7189   -0.1021    0.2398 C   0  0  0  0  0  0  0  0  0  0  0  0
    3.2094   -0.5412   -0.8871 N   0  0  0  0  0  0  0  0  0  0  0  0
    2.4812   -1.5735   -1.2368 C   0  0  0  0  0  0  0  0  0  0  0  0
    1.5277   -1.8068   -0.3722 N   0  0  0  0  0  0  0  0  0  0  0  0
    1.6564   -0.9204    0.5679 C   0  0  0  0  0  0  0  0  0  0  0  0
    0.8920   -0.7453    1.7235 C   0  0  0  0  0  0  0  0  0  0  0  0
   -0.2746   -0.0321    3.9951 H   0  0  0  0  0  0  0  0  0  0  0  0
    0.7269    1.3562    4.3454 H   0  0  0  0  0  0  0  0  0  0  0  0
    2.5711    2.0196    2.8915 H   0  0  0  0  0  0  0  0  0  0  0  0
    4.7377    1.7202   -0.0594 H   0  0  0  0  0  0  0  0  0  0  0  0
    4.3889    2.6148    1.3909 H   0  0  0  0  0  0  0  0  0  0  0  0
    2.6350   -2.1603   -2.1352 H   0  0  0  0  0  0  0  0  0  0  0  0
    4.3126   -0.1462   -1.7662 C   0  0  0  0  0  0  0  0  0  0  0  0
    4.1280    0.8769   -2.1088 H   0  0  0  0  0  0  0  0  0  0  0  0
    5.2442   -0.2057   -1.1945 H   0  0  0  0  0  0  0  0  0  0  0  0
    4.3763   -0.8132   -2.6330 H   0  0  0  0  0  0  0  0  0  0  0  0
    0.0674   -1.4064    1.9706 H   0  0  0  0  0  0  0  0  0  0  0  0
    1.0743   -3.7263   -1.0281 H   0  0  0  0  0  0  0  0  0  0  0  0
    0.5467   -2.8815   -0.5713 C   0  0  0  0  0  0  0  0  0  0  0  0
    0.2072   -3.2102    0.4162 H   0  0  0  0  0  0  0  0  0  0  0  0
   -0.6395   -2.4555   -1.4623 C   0  0  0  0  0  0  0  0  0  0  0  0
   -0.2871   -2.0614   -2.4205 H   0  0  0  0  0  0  0  0  0  0  0  0
   -1.2630   -3.3232   -1.6997 H   0  0  0  0  0  0  0  0  0  0  0  0
  1 13  1  0  0  0  0
  2 11  1  0  0  0  0
  2  1  1  1  0  0  0
  3  2  1  0  0  0  0
  4  3  1  0  0  0  0
  4 10  2  0  0  0  0
  5  6  1  0  0  0  0
  5  4  1  0  0  0  0
  6  8  2  0  0  0  0
  7 16  1  0  0  0  0
  7  6  1  0  0  0  0
  8 17  1  0  0  0  0
  8  9  1  0  0  0  0
  9 18  1  0  0  0  0
 10  9  1  0  0  0  0
 10 11  1  0  0  0  0
 11 22  1  0  0  0  0
 12  1  1  0  0  0  0
 14  5  1  0  0  0  0
 15  7  1  0  0  0  0
 18 20  1  0  0  0  0
 19 18  1  0  0  0  0
 21 18  1  0  0  0  0
 22 24  1  0  0  0  0
 22 25  1  0  0  0  0
 23 22  1  0  0  0  0
 26 37  1  0  0  0  0
 26 38  1  0  0  0  0
 27 26  1  0  0  0  0
 28 27  1  0  0  0  0
 28 39  1  0  0  0  0
 29 28  2  0  0  0  0
 30 29  1  0  0  0  0
 30 41  1  0  0  0  0
 31 35  2  0  0  0  0
 31 29  1  0  0  0  0
 32 31  1  0  0  0  0
 33 32  1  0  0  0  0
 33 34  1  0  0  0  0
 34 35  1  0  0  0  0
 35 36  1  0  0  0  0
 36 47  1  0  0  0  0
 36 27  2  0  0  0  0
 40 30  1  0  0  0  0
 42 33  1  0  0  0  0
 43 45  1  0  0  0  0
 43 32  1  0  0  0  0
 44 43  1  0  0  0  0
 46 43  1  0  0  0  0
 48 49  1  0  0  0  0
 49 34  1  0  0  0  0
 49 50  1  0  0  0  0
 51  3  1  0  0  0  0
 51 49  1  0  0  0  0
 52 51  1  0  0  0  0
 53 51  1  0  0  0  0
M  END
>  <energy_and_gap>
-15.082  3.792

$$$$
BEA_40/Syn027732/Syn027732.car
 OpenBabel12061810373D

 48 52  0  0  1  0  0  0  0  0999 V2000
    0.1780    1.5910    0.0609 N   0  0  0  0  0  0  0  0  0  0  0  0
    1.3635    0.8784    0.0401 C   0  0  1  0  0  0  0  0  0  0  0  0
    1.4368   -0.4360   -0.1355 N   0  0  0  0  0  0  0  0  0  0  0  0
    2.7654   -0.7644   -0.0947 C   0  0  0  0  0  0  0  0  0  0  0  0
    3.4074   -1.9956   -0.2538 C   0  0  0  0  0  0  0  0  0  0  0  0
    4.8108   -1.9903   -0.1356 C   0  0  0  0  0  0  0  0  0  0  0  0
    5.5321   -0.8124    0.1454 C   0  0  0  0  0  0  0  0  0  0  0  0
    4.8886    0.4400    0.3168 C   0  0  0  0  0  0  0  0  0  0  0  0
    5.6666    1.5696    0.6493 N   0  0  0  0  0  0  0  0  0  0  0  0
    3.4892    0.4416    0.1641 C   0  0  0  0  0  0  0  0  0  0  0  0
    2.5558    1.4376    0.1936 N   0  0  0  0  0  0  0  0  0  0  0  0
   -0.7007    1.1597   -0.1905 H   0  0  0  0  0  0  0  0  0  0  0  0
    0.1402    2.5600    0.3564 H   0  0  0  0  0  0  0  0  0  0  0  0
    2.8856   -2.9220   -0.4639 H   0  0  0  0  0  0  0  0  0  0  0  0
    5.3522   -2.9230   -0.2544 H   0  0  0  0  0  0  0  0  0  0  0  0
    6.6114   -0.8853    0.2421 H   0  0  0  0  0  0  0  0  0  0  0  0
    5.2501    2.4197    1.0107 H   0  0  0  0  0  0  0  0  0  0  0  0
    6.6813    1.5176    0.6176 H   0  0  0  0  0  0  0  0  0  0  0  0
    2.8240    2.8751    0.3319 C   0  0  0  0  0  0  0  0  0  0  0  0
    3.6636    3.1407   -0.3168 H   0  0  0  0  0  0  0  0  0  0  0  0
    1.9648    3.4657    0.0071 H   0  0  0  0  0  0  0  0  0  0  0  0
    3.0472    3.0843    1.3828 H   0  0  0  0  0  0  0  0  0  0  0  0
   -2.7035   -0.3346   -0.8106 N   0  0  0  0  0  0  0  0  0  0  0  0
   -2.8810    0.5408   -1.7709 C   0  0  0  0  0  0  0  0  0  0  0  0
   -3.9292    1.4318   -1.5726 C   0  0  0  0  0  0  0  0  0  0  0  0
   -4.3681    0.9512   -0.4031 N   0  0  0  0  0  0  0  0  0  0  0  0
   -5.3692    1.2504    0.4300 C   0  0  0  0  0  0  0  0  0  0  0  0
   -5.2505    0.2839    1.4553 C   0  0  0  0  0  0  0  0  0  0  0  0
   -4.1872   -0.5206    1.1434 N   0  0  0  0  0  0  0  0  0  0  0  0
   -3.6757   -0.0599    0.0076 C   0  0  1  0  0  0  0  0  0  0  0  0
   -2.2394    0.5257   -2.6408 H   0  0  0  0  0  0  0  0  0  0  0  0
   -4.4201    2.2679   -2.0522 H   0  0  0  0  0  0  0  0  0  0  0  0
   -6.0155    2.0826    0.1854 H   0  0  0  0  0  0  0  0  0  0  0  0
   -5.7930    0.0613    2.3642 H   0  0  0  0  0  0  0  0  0  0  0  0
   -3.8036   -1.6517    1.9828 C   0  0  0  0  0  0  0  0  0  0  0  0
   -4.6460   -1.9389    2.6204 H   0  0  0  0  0  0  0  0  0  0  0  0
   -3.5387   -2.4930    1.3358 H   0  0  0  0  0  0  0  0  0  0  0  0
   -2.9521   -1.3463    2.5982 H   0  0  0  0  0  0  0  0  0  0  0  0
   -1.7355   -1.4429   -0.7305 C   0  0  2  0  0  0  0  0  0  0  0  0
   -2.2808   -2.3805   -0.8895 H   0  0  0  0  0  0  0  0  0  0  0  0
   -0.8450   -1.4801    0.5357 C   0  0  0  0  0  0  0  0  0  0  0  0
   -0.9386   -0.6156    1.1990 H   0  0  0  0  0  0  0  0  0  0  0  0
   -0.9604   -2.4104    1.1008 H   0  0  0  0  0  0  0  0  0  0  0  0
    0.4150   -1.4932   -0.3494 C   0  0  1  0  0  0  0  0  0  0  0  0
    0.8733   -2.4841   -0.3047 H   0  0  0  0  0  0  0  0  0  0  0  0
   -0.4592   -1.3556   -1.6081 C   0  0  0  0  0  0  0  0  0  0  0  0
   -0.3540   -2.2087   -2.2857 H   0  0  0  0  0  0  0  0  0  0  0  0
   -0.3090   -0.4145   -2.1447 H   0  0  0  0  0  0  0  0  0  0  0  0
  1 13  1  0  0  0  0
  2  1  1  6  0  0  0
  2 11  1  0  0  0  0
  3  4  1  0  0  0  0
  3  2  1  0  0  0  0
  4 10  1  0  0  0  0
  5  6  1  0  0  0  0
  5  4  2  0  0  0  0
  6  7  2  0  0  0  0
  7 16  1  0  0  0  0
  7  8  1  0  0  0  0
  8  9  1  0  0  0  0
  9 17  1  0  0  0  0
 10 11  1  0  0  0  0
 10  8  2  0  0  0  0
 11 19  1  0  0  0  0
 12  1  1  0  0  0  0
 14  5  1  0  0  0  0
 15  6  1  0  0  0  0
 18  9  1  0  0  0  0
 19 22  1  0  0  0  0
 20 19  1  0  0  0  0
 21 19  1  0  0  0  0
 23 39  1  0  0  0  0
 24 25  2  0  0  0  0
 24 23  1  0  0  0  0
 25 26  1  0  0  0  0
 26 30  1  0  0  0  0
 26 27  1  0  0  0  0
 27 28  2  0  0  0  0
 28 34  1  0  0  0  0
 29 28  1  0  0  0  0
 29 35  1  0  0  0  0
 30 23  1  6  0  0  0
 30 29  1  0  0  0  0
 31 24  1  0  0  0  0
 32 25  1  0  0  0  0
 33 27  1  0  0  0  0
 35 38  1  0  0  0  0
 35 36  1  0  0  0  0
 37 35  1  0  0  0  0
 39 40  1  6  0  0  0
 39 41  1  0  0  0  0
 41 43  1  0  0  0  0
 41 42  1  0  0  0  0
 44 45  1  1  0  0  0
 44  3  1  0  0  0  0
 44 41  1  0  0  0  0
 46 39  1  0  0  0  0
 46 44  1  0  0  0  0
 47 46  1  0  0  0  0
 48 46  1  0  0  0  0
M  END
>  <energy_and_gap>
-15.098  3.666

$$$$
BEA_40/Syn020147/Syn020147.car
 OpenBabel12061810373D

 52 55  0  0  1  0  0  0  0  0999 V2000
   -1.5939   -2.6485   -0.2046 N   0  0  0  0  0  0  0  0  0  0  0  0
   -2.3783   -1.5089   -0.1773 C   0  0  1  0  0  0  0  0  0  0  0  0
   -3.6978   -1.5626   -0.1975 N   0  0  0  0  0  0  0  0  0  0  0  0
   -4.1643   -0.2972   -0.0863 C   0  0  0  0  0  0  0  0  0  0  0  0
   -5.4770    0.1700   -0.0806 C   0  0  0  0  0  0  0  0  0  0  0  0
   -5.6345    1.5585    0.0909 C   0  0  0  0  0  0  0  0  0  0  0  0
   -4.5310    2.4147    0.2851 C   0  0  0  0  0  0  0  0  0  0  0  0
   -3.1950    1.9334    0.3024 C   0  0  0  0  0  0  0  0  0  0  0  0
   -2.1585    2.8333    0.6275 N   0  0  0  0  0  0  0  0  0  0  0  0
   -3.0253    0.5543    0.0594 C   0  0  0  0  0  0  0  0  0  0  0  0
   -1.9222   -0.2595   -0.1008 N   0  0  0  0  0  0  0  0  0  0  0  0
   -1.9964   -3.5574   -0.4075 H   0  0  0  0  0  0  0  0  0  0  0  0
   -0.6153   -2.6315    0.0533 H   0  0  0  0  0  0  0  0  0  0  0  0
   -6.3386   -0.4771   -0.2021 H   0  0  0  0  0  0  0  0  0  0  0  0
   -6.6351    1.9780    0.0983 H   0  0  0  0  0  0  0  0  0  0  0  0
   -4.7287    3.4693    0.4534 H   0  0  0  0  0  0  0  0  0  0  0  0
   -2.3189    3.8361    0.5811 H   0  0  0  0  0  0  0  0  0  0  0  0
   -1.2997    2.5100    1.0600 H   0  0  0  0  0  0  0  0  0  0  0  0
   -4.5069   -2.7822   -0.3111 C   0  0  0  0  0  0  0  0  0  0  0  0
   -4.2564   -3.4439    0.5245 H   0  0  0  0  0  0  0  0  0  0  0  0
   -5.5720   -2.5416   -0.2723 H   0  0  0  0  0  0  0  0  0  0  0  0
   -4.2762   -3.2613   -1.2681 H   0  0  0  0  0  0  0  0  0  0  0  0
    4.2494   -2.5037    1.4734 C   0  0  0  0  0  0  0  0  0  0  0  0
    4.1797   -2.0445    0.0159 C   0  0  0  0  0  0  0  0  0  0  0  0
    3.9359   -0.5733   -0.0784 C   0  0  1  0  0  0  0  0  0  0  0  0
    4.9061    0.3347   -0.1676 N   0  0  0  0  0  0  0  0  0  0  0  0
    4.3004    1.5386   -0.2710 C   0  0  0  0  0  0  0  0  0  0  0  0
    4.9136    2.7659   -0.4122 N   0  0  0  0  0  0  0  0  0  0  0  0
    2.9169    1.3325   -0.2203 C   0  0  0  0  0  0  0  0  0  0  0  0
    2.7274   -0.0044   -0.0912 N   0  0  0  0  0  0  0  0  0  0  0  0
    5.0588   -1.9986    2.0097 H   0  0  0  0  0  0  0  0  0  0  0  0
    3.3153   -2.2918    2.0028 H   0  0  0  0  0  0  0  0  0  0  0  0
    4.4303   -3.5810    1.5228 H   0  0  0  0  0  0  0  0  0  0  0  0
    5.1100   -2.3053   -0.4964 H   0  0  0  0  0  0  0  0  0  0  0  0
    3.3933   -2.5923   -0.5103 H   0  0  0  0  0  0  0  0  0  0  0  0
    5.9238    2.8449   -0.4702 H   0  0  0  0  0  0  0  0  0  0  0  0
    4.3701    3.6225   -0.4725 H   0  0  0  0  0  0  0  0  0  0  0  0
    2.0420    1.9671   -0.2647 H   0  0  0  0  0  0  0  0  0  0  0  0
    6.3596    0.1471   -0.1717 C   0  0  0  0  0  0  0  0  0  0  0  0
    6.6099   -0.8415    0.2218 H   0  0  0  0  0  0  0  0  0  0  0  0
    6.8190    0.9050    0.4707 H   0  0  0  0  0  0  0  0  0  0  0  0
    6.7138    0.2461   -1.2027 H   0  0  0  0  0  0  0  0  0  0  0  0
   -0.5396    0.2678   -0.2213 C   0  0  2  0  0  0  0  0  0  0  0  0
   -0.5709    1.3240   -0.4927 H   0  0  0  0  0  0  0  0  0  0  0  0
    0.4597   -0.4178   -1.1818 C   0  0  0  0  0  0  0  0  0  0  0  0
    0.8640    0.2667   -1.9346 H   0  0  0  0  0  0  0  0  0  0  0  0
    0.1013   -1.3295   -1.6648 H   0  0  0  0  0  0  0  0  0  0  0  0
    1.4124   -0.6715    0.0080 C   0  0  2  0  0  0  0  0  0  0  0  0
    1.5440   -1.7358    0.2216 H   0  0  0  0  0  0  0  0  0  0  0  0
    0.3914   -0.0239    0.9723 C   0  0  0  0  0  0  0  0  0  0  0  0
    0.7404    0.8779    1.4845 H   0  0  0  0  0  0  0  0  0  0  0  0
   -0.0267   -0.7377    1.6894 H   0  0  0  0  0  0  0  0  0  0  0  0
  1 13  1  0  0  0  0
  2  1  1  1  0  0  0
  2 11  1  0  0  0  0
  3  2  1  0  0  0  0
  3  4  1  0  0  0  0
  4  5  2  0  0  0  0
  4 10  1  0  0  0  0
  5  6  1  0  0  0  0
  6 15  1  0  0  0  0
  6  7  2  0  0  0  0
  7  8  1  0  0  0  0
  7 16  1  0  0  0  0
  8  9  1  0  0  0  0
  9 18  1  0  0  0  0
 10  8  2  0  0  0  0
 11 10  1  0  0  0  0
 12  1  1  0  0  0  0
 14  5  1  0  0  0  0
 17  9  1  0  0  0  0
 19 21  1  0  0  0  0
 19  3  1  0  0  0  0
 19 20  1  0  0  0  0
 22 19  1  0  0  0  0
 23 33  1  0  0  0  0
 23 32  1  0  0  0  0
 23 31  1  0  0  0  0
 24 23  1  0  0  0  0
 25 24  1  6  0  0  0
 26 25  1  0  0  0  0
 27 29  2  0  0  0  0
 27 26  1  0  0  0  0
 28 27  1  0  0  0  0
 29 30  1  0  0  0  0
 30 25  1  0  0  0  0
 30 48  1  0  0  0  0
 34 24  1  0  0  0  0
 35 24  1  0  0  0  0
 36 28  1  0  0  0  0
 37 28  1  0  0  0  0
 38 29  1  0  0  0  0
 39 26  1  0  0  0  0
 39 40  1  0  0  0  0
 39 41  1  0  0  0  0
 42 39  1  0  0  0  0
 43 44  1  6  0  0  0
 43 11  1  0  0  0  0
 43 50  1  0  0  0  0
 45 43  1  0  0  0  0
 45 48  1  0  0  0  0
 46 45  1  0  0  0  0
 47 45  1  0  0  0  0
 48 49  1  1  0  0  0
 48 50  1  0  0  0  0
 50 51  1  0  0  0  0
 50 52  1  0  0  0  0
M  END
>  <energy_and_gap>
-15.172  3.591

$$$$
BEA_40/Syn020917/Syn020917.car
 OpenBabel12061810373D

 49 52  0  0  1  0  0  0  0  0999 V2000
   -0.7620   -2.9836    0.0000 N   0  0  0  0  0  0  0  0  0  0  0  0
   -1.5677   -1.8576    0.0000 C   0  0  1  0  0  0  0  0  0  0  0  0
   -2.8800   -1.9311    0.0000 N   0  0  0  0  0  0  0  0  0  0  0  0
   -3.3076   -0.7014    0.0000 C   0  0  0  0  0  0  0  0  0  0  0  0
   -4.6188   -0.2146   -0.0000 C   0  0  0  0  0  0  0  0  0  0  0  0
   -4.8064    1.1902   -0.0000 C   0  0  0  0  0  0  0  0  0  0  0  0
   -6.1362    1.6739   -0.0000 N   0  0  0  0  0  0  0  0  0  0  0  0
   -3.6735    2.0638   -0.0000 C   0  0  0  0  0  0  0  0  0  0  0  0
   -3.8057    3.4728   -0.0000 N   0  0  0  0  0  0  0  0  0  0  0  0
   -2.3601    1.5283    0.0000 C   0  0  0  0  0  0  0  0  0  0  0  0
   -2.2096    0.1344    0.0000 C   0  0  0  0  0  0  0  0  0  0  0  0
   -1.1256   -0.6088    0.0000 N   0  0  0  0  0  0  0  0  0  0  0  0
    0.2477   -2.9236    0.0000 H   0  0  0  0  0  0  0  0  0  0  0  0
   -1.1622   -3.9156    0.0000 H   0  0  0  0  0  0  0  0  0  0  0  0
   -5.4737   -0.8835   -0.0000 H   0  0  0  0  0  0  0  0  0  0  0  0
   -6.9182    1.0245    0.0000 H   0  0  0  0  0  0  0  0  0  0  0  0
   -6.3527    2.6649    0.0000 H   0  0  0  0  0  0  0  0  0  0  0  0
   -4.7104    3.9316   -0.0000 H   0  0  0  0  0  0  0  0  0  0  0  0
   -2.9811    4.0670   -0.0000 H   0  0  0  0  0  0  0  0  0  0  0  0
   -1.5068    2.1974    0.0000 H   0  0  0  0  0  0  0  0  0  0  0  0
   -3.6835   -3.1612   -0.0000 C   0  0  0  0  0  0  0  0  0  0  0  0
   -3.4386   -3.7340   -0.9006 H   0  0  0  0  0  0  0  0  0  0  0  0
   -4.7508   -2.9274   -0.0000 H   0  0  0  0  0  0  0  0  0  0  0  0
   -3.4386   -3.7340    0.9006 H   0  0  0  0  0  0  0  0  0  0  0  0
    4.6487   -0.8227   -0.0000 C   0  0  0  0  0  0  0  0  0  0  0  0
    5.6717    0.0086   -0.0000 N   0  0  0  0  0  0  0  0  0  0  0  0
    5.1532    1.2570    0.0000 C   0  0  0  0  0  0  0  0  0  0  0  0
    3.7505    1.1240    0.0000 C   0  0  0  0  0  0  0  0  0  0  0  0
    3.4827   -0.2030    0.0000 N   0  0  0  0  0  0  0  0  0  0  0  0
    5.9288    2.5384    0.0000 C   0  0  0  0  0  0  0  0  0  0  0  0
    4.7589   -1.9003   -0.0000 H   0  0  0  0  0  0  0  0  0  0  0  0
    2.9055    1.7990    0.0000 H   0  0  0  0  0  0  0  0  0  0  0  0
    7.0061    2.3518    0.0000 H   0  0  0  0  0  0  0  0  0  0  0  0
    5.6840    3.1249    0.8904 H   0  0  0  0  0  0  0  0  0  0  0  0
    5.6840    3.1249   -0.8904 H   0  0  0  0  0  0  0  0  0  0  0  0
    7.0723   -0.4037   -0.0000 C   0  0  0  0  0  0  0  0  0  0  0  0
    7.5479   -0.0020   -0.9004 H   0  0  0  0  0  0  0  0  0  0  0  0
    7.5479   -0.0020    0.9004 H   0  0  0  0  0  0  0  0  0  0  0  0
    7.1350   -1.4969   -0.0000 H   0  0  0  0  0  0  0  0  0  0  0  0
    0.2406   -0.0211    0.0000 C   0  0  1  0  0  0  0  0  0  0  0  0
    0.1954    1.0705    0.0000 H   0  0  0  0  0  0  0  0  0  0  0  0
    1.2120   -0.5098    1.0944 C   0  0  0  0  0  0  0  0  0  0  0  0
    1.5703    0.2951    1.7442 H   0  0  0  0  0  0  0  0  0  0  0  0
    0.8333   -1.3448    1.6912 H   0  0  0  0  0  0  0  0  0  0  0  0
    2.2125   -0.9441    0.0000 C   0  0  1  0  0  0  0  0  0  0  0  0
    2.4067   -2.0230   -0.0000 H   0  0  0  0  0  0  0  0  0  0  0  0
    1.2120   -0.5098   -1.0944 C   0  0  0  0  0  0  0  0  0  0  0  0
    1.5703    0.2951   -1.7442 H   0  0  0  0  0  0  0  0  0  0  0  0
    0.8333   -1.3448   -1.6912 H   0  0  0  0  0  0  0  0  0  0  0  0
  1 14  1  0  0  0  0
  1 13  1  0  0  0  0
  2 12  1  0  0  0  0
  2  1  1  1  0  0  0
  3  2  1  0  0  0  0
  4 11  2  0  0  0  0
  4  3  1  0  0  0  0
  5  4  1  0  0  0  0
  6  7  1  0  0  0  0
  6  8  1  0  0  0  0
  6  5  2  0  0  0  0
  7 17  1  0  0  0  0
  7 16  1  0  0  0  0
  8 10  2  0  0  0  0
  9  8  1  0  0  0  0
 10 20  1  0  0  0  0
 11 10  1  0  0  0  0
 11 12  1  0  0  0  0
 15  5  1  0  0  0  0
 18  9  1  0  0  0  0
 19  9  1  0  0  0  0
 21  3  1  0  0  0  0
 21 24  1  0  0  0  0
 22 21  1  0  0  0  0
 23 21  1  0  0  0  0
 25 26  1  0  0  0  0
 25 29  1  0  0  0  0
 26 27  1  0  0  0  0
 27 30  1  0  0  0  0
 27 28  2  0  0  0  0
 28 32  1  0  0  0  0
 29 45  1  0  0  0  0
 29 28  1  0  0  0  0
 30 34  1  0  0  0  0
 31 25  1  0  0  0  0
 33 30  1  0  0  0  0
 35 30  1  0  0  0  0
 36 26  1  0  0  0  0
 36 38  1  0  0  0  0
 37 36  1  0  0  0  0
 39 36  1  0  0  0  0
 40 12  1  0  0  0  0
 40 41  1  1  0  0  0
 40 42  1  0  0  0  0
 42 44  1  0  0  0  0
 42 43  1  0  0  0  0
 45 46  1  6  0  0  0
 45 42  1  0  0  0  0
 47 45  1  0  0  0  0
 47 40  1  0  0  0  0
 48 47  1  0  0  0  0
 49 47  1  0  0  0  0
M  END
>  <energy_and_gap>
-15.161  3.564

$$$$
BEA_40/Syn028404/Syn028404.car
 OpenBabel12061810373D

 54 58  0  0  1  0  0  0  0  0999 V2000
    1.9020   -2.5695    0.5000 N   0  0  0  0  0  0  0  0  0  0  0  0
    2.7910   -1.5500    0.2077 C   0  0  2  0  0  0  0  0  0  0  0  0
    4.0900   -1.7598    0.0950 N   0  0  0  0  0  0  0  0  0  0  0  0
    4.6844   -0.5633   -0.1203 C   0  0  0  0  0  0  0  0  0  0  0  0
    6.0291   -0.2616   -0.3255 C   0  0  0  0  0  0  0  0  0  0  0  0
    6.3354    1.1031   -0.4860 C   0  0  0  0  0  0  0  0  0  0  0  0
    5.3448    2.1033   -0.4034 C   0  0  0  0  0  0  0  0  0  0  0  0
    3.9780    1.7957   -0.1708 C   0  0  0  0  0  0  0  0  0  0  0  0
    3.0712    2.8587    0.0230 N   0  0  0  0  0  0  0  0  0  0  0  0
    3.6532    0.4260   -0.0805 C   0  0  0  0  0  0  0  0  0  0  0  0
    2.4668   -0.2691    0.0366 N   0  0  0  0  0  0  0  0  0  0  0  0
    2.1924   -3.5413    0.4744 H   0  0  0  0  0  0  0  0  0  0  0  0
    0.9621   -2.3843    0.8269 H   0  0  0  0  0  0  0  0  0  0  0  0
    6.8077   -1.0154   -0.3658 H   0  0  0  0  0  0  0  0  0  0  0  0
    7.3667    1.3951   -0.6538 H   0  0  0  0  0  0  0  0  0  0  0  0
    5.6586    3.1390   -0.4949 H   0  0  0  0  0  0  0  0  0  0  0  0
    3.3203    3.8017   -0.2637 H   0  0  0  0  0  0  0  0  0  0  0  0
    2.2361    2.7396    0.5864 H   0  0  0  0  0  0  0  0  0  0  0  0
    4.7626   -3.0608    0.1955 C   0  0  0  0  0  0  0  0  0  0  0  0
    4.3913   -3.7041   -0.6088 H   0  0  0  0  0  0  0  0  0  0  0  0
    4.5356   -3.4941    1.1751 H   0  0  0  0  0  0  0  0  0  0  0  0
    5.8443   -2.9426    0.0968 H   0  0  0  0  0  0  0  0  0  0  0  0
   -5.9525   -2.6291   -0.4312 N   0  0  0  0  0  0  0  0  0  0  0  0
   -5.3113   -1.3794   -0.2582 C   0  0  0  0  0  0  0  0  0  0  0  0
   -6.1218   -0.2202   -0.2881 C   0  0  0  0  0  0  0  0  0  0  0  0
   -5.5665    1.0638   -0.1696 C   0  0  0  0  0  0  0  0  0  0  0  0
   -4.1860    1.1435    0.0033 C   0  0  0  0  0  0  0  0  0  0  0  0
   -3.4500    2.2002    0.1343 N   0  0  0  0  0  0  0  0  0  0  0  0
   -2.2246    1.7854    0.2893 C   0  0  0  0  0  0  0  0  0  0  0  0
   -2.1429    0.4724    0.2789 N   0  0  0  0  0  0  0  0  0  0  0  0
   -3.3641    0.0331    0.0648 C   0  0  0  0  0  0  0  0  0  0  0  0
   -3.8894   -1.2723   -0.0887 C   0  0  0  0  0  0  0  0  0  0  0  0
   -3.0699   -2.4246   -0.1076 N   0  0  0  0  0  0  0  0  0  0  0  0
   -6.9648   -2.6809   -0.5084 H   0  0  0  0  0  0  0  0  0  0  0  0
   -5.4311   -3.4958   -0.5141 H   0  0  0  0  0  0  0  0  0  0  0  0
   -7.1962   -0.3040   -0.4220 H   0  0  0  0  0  0  0  0  0  0  0  0
   -6.1990    1.9449   -0.2087 H   0  0  0  0  0  0  0  0  0  0  0  0
   -1.3865    2.4598    0.4077 H   0  0  0  0  0  0  0  0  0  0  0  0
   -3.4207   -3.3237    0.2080 H   0  0  0  0  0  0  0  0  0  0  0  0
   -2.1381   -2.3930   -0.5063 H   0  0  0  0  0  0  0  0  0  0  0  0
   -3.8346    3.6118    0.1230 C   0  0  0  0  0  0  0  0  0  0  0  0
   -4.5312    3.7858    0.9497 H   0  0  0  0  0  0  0  0  0  0  0  0
   -2.9462    4.2404    0.2468 H   0  0  0  0  0  0  0  0  0  0  0  0
   -4.3138    3.8312   -0.8367 H   0  0  0  0  0  0  0  0  0  0  0  0
    1.1348    0.3750   -0.0886 C   0  0  2  0  0  0  0  0  0  0  0  0
    1.2362    1.3379   -0.5914 H   0  0  0  0  0  0  0  0  0  0  0  0
    0.3067    0.4550    1.2079 C   0  0  0  0  0  0  0  0  0  0  0  0
    0.1275    1.4765    1.5519 H   0  0  0  0  0  0  0  0  0  0  0  0
    0.7251   -0.1461    2.0218 H   0  0  0  0  0  0  0  0  0  0  0  0
   -0.8718   -0.2560    0.4910 C   0  0  2  0  0  0  0  0  0  0  0  0
   -1.0831   -1.2080    0.9853 H   0  0  0  0  0  0  0  0  0  0  0  0
   -0.0158   -0.3821   -0.7896 C   0  0  0  0  0  0  0  0  0  0  0  0
   -0.4233    0.1691   -1.6438 H   0  0  0  0  0  0  0  0  0  0  0  0
    0.2003   -1.4123   -1.0808 H   0  0  0  0  0  0  0  0  0  0  0  0
  1 13  1  0  0  0  0
  2  1  1  1  0  0  0
  3 19  1  0  0  0  0
  3  2  1  0  0  0  0
  4 10  1  0  0  0  0
  4  3  1  0  0  0  0
  5  4  2  0  0  0  0
  6  7  2  0  0  0  0
  6  5  1  0  0  0  0
  7  8  1  0  0  0  0
  8 10  2  0  0  0  0
  8  9  1  0  0  0  0
  9 18  1  0  0  0  0
 10 11  1  0  0  0  0
 11  2  1  0  0  0  0
 12  1  1  0  0  0  0
 14  5  1  0  0  0  0
 15  6  1  0  0  0  0
 16  7  1  0  0  0  0
 17  9  1  0  0  0  0
 19 21  1  0  0  0  0
 20 19  1  0  0  0  0
 22 19  1  0  0  0  0
 23 24  1  0  0  0  0
 24 32  2  0  0  0  0
 25 24  1  0  0  0  0
 25 26  2  0  0  0  0
 26 27  1  0  0  0  0
 27 31  2  0  0  0  0
 27 28  1  0  0  0  0
 28 29  1  0  0  0  0
 29 38  1  0  0  0  0
 30 29  1  0  0  0  0
 30 50  1  0  0  0  0
 31 30  1  0  0  0  0
 32 31  1  0  0  0  0
 33 32  1  0  0  0  0
 33 39  1  0  0  0  0
 34 23  1  0  0  0  0
 35 23  1  0  0  0  0
 36 25  1  0  0  0  0
 37 26  1  0  0  0  0
 40 33  1  0  0  0  0
 41 28  1  0  0  0  0
 41 43  1  0  0  0  0
 41 42  1  0  0  0  0
 44 41  1  0  0  0  0
 45 46  1  6  0  0  0
 45 11  1  0  0  0  0
 45 47  1  0  0  0  0
 47 48  1  0  0  0  0
 47 49  1  0  0  0  0
 50 51  1  1  0  0  0
 50 47  1  0  0  0  0
 52 45  1  0  0  0  0
 52 50  1  0  0  0  0
 53 52  1  0  0  0  0
 54 52  1  0  0  0  0
M  END
>  <energy_and_gap>
-15.214  3.560

$$$$
BEA_40/Syn050850/Syn050850.car
 OpenBabel12061810373D

 51 53  0  0  1  0  0  0  0  0999 V2000
    2.0493   -1.4435   -0.2515 N   0  0  0  0  0  0  0  0  0  0  0  0
    0.7846   -1.3805   -0.6567 C   0  0  1  0  0  0  0  0  0  0  0  0
    0.4120   -0.1427   -0.9407 N   0  0  0  0  0  0  0  0  0  0  0  0
    2.5560   -0.1764   -0.3167 C   0  0  0  0  0  0  0  0  0  0  0  0
    1.4927    0.6445   -0.7424 C   0  0  0  0  0  0  0  0  0  0  0  0
    3.9383    0.1466    0.0231 C   0  0  0  0  0  0  0  0  0  0  0  0
   -0.0503   -2.4750   -0.7845 N   0  0  0  0  0  0  0  0  0  0  0  0
    5.0242   -0.4981   -0.6249 C   0  0  0  0  0  0  0  0  0  0  0  0
    4.2156    1.1513    0.9841 C   0  0  0  0  0  0  0  0  0  0  0  0
    5.5456    1.4858    1.3038 C   0  0  0  0  0  0  0  0  0  0  0  0
    6.3518   -0.1591   -0.3010 C   0  0  0  0  0  0  0  0  0  0  0  0
    6.6126    0.8303    0.6638 C   0  0  0  0  0  0  0  0  0  0  0  0
    1.3806    1.7022   -0.9410 H   0  0  0  0  0  0  0  0  0  0  0  0
    0.2786   -3.4165   -0.5985 H   0  0  0  0  0  0  0  0  0  0  0  0
   -1.0083   -2.3739   -1.1000 H   0  0  0  0  0  0  0  0  0  0  0  0
    4.8481   -1.2573   -1.3809 H   0  0  0  0  0  0  0  0  0  0  0  0
    3.4097    1.6725    1.4920 H   0  0  0  0  0  0  0  0  0  0  0  0
    5.7483    2.2518    2.0448 H   0  0  0  0  0  0  0  0  0  0  0  0
    7.1755   -0.6596   -0.7988 H   0  0  0  0  0  0  0  0  0  0  0  0
    7.6363    1.0904    0.9114 H   0  0  0  0  0  0  0  0  0  0  0  0
    2.7178   -2.6742    0.1916 C   0  0  0  0  0  0  0  0  0  0  0  0
    3.5875   -2.4263    0.8058 H   0  0  0  0  0  0  0  0  0  0  0  0
    3.0233   -3.2373   -0.6961 H   0  0  0  0  0  0  0  0  0  0  0  0
    2.0265   -3.2606    0.8049 H   0  0  0  0  0  0  0  0  0  0  0  0
   -5.4034   -0.1099    0.0322 N   0  0  0  0  0  0  0  0  0  0  0  0
   -5.0102   -1.3325    0.4438 C   0  0  0  0  0  0  0  0  0  0  0  0
   -3.6615   -1.2003    0.8260 C   0  0  0  0  0  0  0  0  0  0  0  0
   -3.2903    0.0850    0.6202 N   0  0  0  0  0  0  0  0  0  0  0  0
   -4.3669    0.6966    0.1559 C   0  0  0  0  0  0  0  0  0  0  0  0
   -2.8733   -2.2108    1.3315 N   0  0  0  0  0  0  0  0  0  0  0  0
   -5.7462   -2.1252    0.4146 H   0  0  0  0  0  0  0  0  0  0  0  0
   -4.4025    1.7485   -0.0986 H   0  0  0  0  0  0  0  0  0  0  0  0
   -3.2343   -3.1547    1.4404 H   0  0  0  0  0  0  0  0  0  0  0  0
   -1.9186   -2.0351    1.6260 H   0  0  0  0  0  0  0  0  0  0  0  0
   -6.7134    0.3009   -0.4601 C   0  0  0  0  0  0  0  0  0  0  0  0
   -7.3725   -0.5723   -0.4994 H   0  0  0  0  0  0  0  0  0  0  0  0
   -6.5900    0.7226   -1.4631 H   0  0  0  0  0  0  0  0  0  0  0  0
   -7.1211    1.0492    0.2273 H   0  0  0  0  0  0  0  0  0  0  0  0
   -2.0332    3.8433    0.1369 C   0  0  0  0  0  0  0  0  0  0  0  0
   -2.5534    3.4967    1.0313 H   0  0  0  0  0  0  0  0  0  0  0  0
   -1.2298    4.5158    0.4494 H   0  0  0  0  0  0  0  0  0  0  0  0
   -2.7479    4.4211   -0.4554 H   0  0  0  0  0  0  0  0  0  0  0  0
   -1.4730    2.7355   -0.6942 C   0  0  0  0  0  0  0  0  0  0  0  0
   -1.0347    3.0686   -1.6288 H   0  0  0  0  0  0  0  0  0  0  0  0
   -1.4610    1.4000   -0.4154 C   0  0  0  0  0  0  0  0  0  0  0  0
   -0.8477    0.4483   -1.4154 C   0  0  0  0  0  0  0  0  0  0  0  0
   -1.5482   -0.3567   -1.6536 H   0  0  0  0  0  0  0  0  0  0  0  0
   -0.6206    0.9467   -2.3652 H   0  0  0  0  0  0  0  0  0  0  0  0
   -2.0261    0.7931    0.8494 C   0  0  0  0  0  0  0  0  0  0  0  0
   -1.3107    0.0884    1.2823 H   0  0  0  0  0  0  0  0  0  0  0  0
   -2.2204    1.5353    1.6284 H   0  0  0  0  0  0  0  0  0  0  0  0
  1 21  1  0  0  0  0
  2  7  1  6  0  0  0
  2  1  1  0  0  0  0
  3  5  1  0  0  0  0
  3  2  1  0  0  0  0
  4  1  1  0  0  0  0
  4  6  1  0  0  0  0
  5  4  2  0  0  0  0
  6  9  2  0  0  0  0
  7 14  1  0  0  0  0
  8 11  2  0  0  0  0
  8  6  1  0  0  0  0
  9 10  1  0  0  0  0
  9 17  1  0  0  0  0
 10 18  1  0  0  0  0
 11 12  1  0  0  0  0
 12 20  1  0  0  0  0
 12 10  2  0  0  0  0
 13  5  1  0  0  0  0
 15  7  1  0  0  0  0
 16  8  1  0  0  0  0
 19 11  1  0  0  0  0
 21 24  1  0  0  0  0
 21 22  1  0  0  0  0
 23 21  1  0  0  0  0
 25 29  1  0  0  0  0
 25 26  1  0  0  0  0
 26 27  2  0  0  0  0
 27 30  1  0  0  0  0
 28 27  1  0  0  0  0
 28 49  1  0  0  0  0
 29 28  1  0  0  0  0
 30 33  1  0  0  0  0
 30 34  1  0  0  0  0
 31 26  1  0  0  0  0
 32 29  1  0  0  0  0
 35 25  1  0  0  0  0
 35 38  1  0  0  0  0
 36 35  1  0  0  0  0
 37 35  1  0  0  0  0
 39 41  1  0  0  0  0
 39 40  1  0  0  0  0
 42 39  1  0  0  0  0
 43 45  2  0  0  0  0
 43 39  1  0  0  0  0
 44 43  1  0  0  0  0
 45 49  1  0  0  0  0
 46  3  1  0  0  0  0
 46 45  1  0  0  0  0
 47 46  1  0  0  0  0
 48 46  1  0  0  0  0
 49 50  1  0  0  0  0
 49 51  1  0  0  0  0
M  END
>  <energy_and_gap>
-15.067  3.511

$$$$
BEA_40/Syn075159/Syn075159.car
 OpenBabel12061810373D

 49 51  0  0  1  0  0  0  0  0999 V2000
    2.3481   -2.5439    2.4164 N   0  0  0  0  0  0  0  0  0  0  0  0
    2.0967   -1.7497    1.2783 C   0  0  0  0  0  0  0  0  0  0  0  0
    2.9770   -0.6897    0.9564 C   0  0  0  0  0  0  0  0  0  0  0  0
    2.7495    0.1288   -0.1788 C   0  0  0  0  0  0  0  0  0  0  0  0
    3.6480    1.1762   -0.4701 N   0  0  0  0  0  0  0  0  0  0  0  0
    1.6124   -0.1576   -0.9553 C   0  0  0  0  0  0  0  0  0  0  0  0
    1.1346    0.4105   -2.0283 N   0  0  0  0  0  0  0  0  0  0  0  0
    0.0482   -0.2495   -2.3491 C   0  0  0  0  0  0  0  0  0  0  0  0
   -0.1976   -1.2172   -1.5045 N   0  0  0  0  0  0  0  0  0  0  0  0
    0.7612   -1.1947   -0.6292 C   0  0  0  0  0  0  0  0  0  0  0  0
    0.9646   -2.0238    0.4758 C   0  0  0  0  0  0  0  0  0  0  0  0
    1.7313   -3.3145    2.6601 H   0  0  0  0  0  0  0  0  0  0  0  0
    3.1586   -2.3665    3.0042 H   0  0  0  0  0  0  0  0  0  0  0  0
    3.8415   -0.5011    1.5877 H   0  0  0  0  0  0  0  0  0  0  0  0
    4.4516    1.3452    0.1289 H   0  0  0  0  0  0  0  0  0  0  0  0
    3.5250    1.7713   -1.2803 H   0  0  0  0  0  0  0  0  0  0  0  0
   -0.5807   -0.0231   -3.2023 H   0  0  0  0  0  0  0  0  0  0  0  0
    1.5299    1.5382   -2.8753 C   0  0  0  0  0  0  0  0  0  0  0  0
    0.8127    1.6814   -3.6910 H   0  0  0  0  0  0  0  0  0  0  0  0
    2.5178    1.3221   -3.2942 H   0  0  0  0  0  0  0  0  0  0  0  0
    1.5563    2.4397   -2.2551 H   0  0  0  0  0  0  0  0  0  0  0  0
    0.2860   -2.8371    0.7134 H   0  0  0  0  0  0  0  0  0  0  0  0
   -1.3667    1.9035    0.5944 C   0  0  2  0  0  0  0  0  0  0  0  0
   -0.3131    2.0517    1.3808 N   0  0  0  0  0  0  0  0  0  0  0  0
   -0.4031    1.1127    2.3470 C   0  0  0  0  0  0  0  0  0  0  0  0
   -1.5734    0.3782    2.0961 C   0  0  0  0  0  0  0  0  0  0  0  0
   -2.1429    0.9036    0.9864 N   0  0  0  0  0  0  0  0  0  0  0  0
   -1.6215    2.6964   -0.5054 N   0  0  0  0  0  0  0  0  0  0  0  0
    0.3782    1.0855    3.0945 H   0  0  0  0  0  0  0  0  0  0  0  0
   -2.0734   -0.4544    2.5716 H   0  0  0  0  0  0  0  0  0  0  0  0
   -0.9897    3.4468   -0.7654 H   0  0  0  0  0  0  0  0  0  0  0  0
   -2.4562    2.5649   -1.0669 H   0  0  0  0  0  0  0  0  0  0  0  0
    0.7762    3.0246    1.3059 C   0  0  0  0  0  0  0  0  0  0  0  0
    0.3724    4.0079    1.5672 H   0  0  0  0  0  0  0  0  0  0  0  0
    1.1696    3.0301    0.2848 H   0  0  0  0  0  0  0  0  0  0  0  0
    1.5715    2.7449    2.0043 H   0  0  0  0  0  0  0  0  0  0  0  0
   -3.4052    0.3927    0.4343 C   0  0  0  0  0  0  0  0  0  0  0  0
   -3.9308   -0.1570    1.2223 H   0  0  0  0  0  0  0  0  0  0  0  0
   -4.0237    1.2651    0.1988 H   0  0  0  0  0  0  0  0  0  0  0  0
   -3.2145   -0.4708   -0.8272 C   0  0  0  0  0  0  0  0  0  0  0  0
   -4.1968   -0.7287   -1.2350 H   0  0  0  0  0  0  0  0  0  0  0  0
   -2.7271    0.1360   -1.5950 H   0  0  0  0  0  0  0  0  0  0  0  0
   -2.4397   -1.7489   -0.6145 C   0  0  0  0  0  0  0  0  0  0  0  0
   -2.7303   -2.6050    0.3946 C   0  0  0  0  0  0  0  0  0  0  0  0
   -3.5255   -2.4054    1.1031 H   0  0  0  0  0  0  0  0  0  0  0  0
   -2.1899   -3.5367    0.5185 H   0  0  0  0  0  0  0  0  0  0  0  0
   -1.3691   -2.0948   -1.6186 C   0  0  0  0  0  0  0  0  0  0  0  0
   -1.0097   -3.1222   -1.4904 H   0  0  0  0  0  0  0  0  0  0  0  0
   -1.7635   -2.0257   -2.6391 H   0  0  0  0  0  0  0  0  0  0  0  0
  1 12  1  0  0  0  0
  1 13  1  0  0  0  0
  2  1  1  0  0  0  0
  3  2  1  0  0  0  0
  3 14  1  0  0  0  0
  4  3  2  0  0  0  0
  5  4  1  0  0  0  0
  5 15  1  0  0  0  0
  6 10  2  0  0  0  0
  6  4  1  0  0  0  0
  7  6  1  0  0  0  0
  8  7  1  0  0  0  0
  8  9  1  0  0  0  0
  9 10  1  0  0  0  0
 10 11  1  0  0  0  0
 11 22  1  0  0  0  0
 11  2  2  0  0  0  0
 16  5  1  0  0  0  0
 17  8  1  0  0  0  0
 18 21  1  0  0  0  0
 18  7  1  0  0  0  0
 19 18  1  0  0  0  0
 20 18  1  0  0  0  0
 23 28  1  6  0  0  0
 23 27  1  0  0  0  0
 23 24  1  0  0  0  0
 24 25  1  0  0  0  0
 25 29  1  0  0  0  0
 26 25  2  0  0  0  0
 26 30  1  0  0  0  0
 27 26  1  0  0  0  0
 31 28  1  0  0  0  0
 32 28  1  0  0  0  0
 33 24  1  0  0  0  0
 33 34  1  0  0  0  0
 33 36  1  0  0  0  0
 35 33  1  0  0  0  0
 37 27  1  0  0  0  0
 37 38  1  0  0  0  0
 39 37  1  0  0  0  0
 40 43  1  0  0  0  0
 40 37  1  0  0  0  0
 41 40  1  0  0  0  0
 42 40  1  0  0  0  0
 43 44  2  0  0  0  0
 44 46  1  0  0  0  0
 44 45  1  0  0  0  0
 47  9  1  0  0  0  0
 47 48  1  0  0  0  0
 47 43  1  0  0  0  0
 49 47  1  0  0  0  0
M  END
>  <energy_and_gap>
-15.104  3.474

$$$$
BEA_40/Syn030814/Syn030814.car
 OpenBabel12061810373D

 50 53  0  0  1  0  0  0  0  0999 V2000
   -0.9025    3.1386   -0.0797 N   0  0  0  0  0  0  0  0  0  0  0  0
   -1.6320    1.9625   -0.0427 C   0  0  1  0  0  0  0  0  0  0  0  0
   -2.9462    1.9485   -0.0566 N   0  0  0  0  0  0  0  0  0  0  0  0
   -3.2916    0.6939   -0.0146 C   0  0  0  0  0  0  0  0  0  0  0  0
   -4.5676    0.1214   -0.0082 C   0  0  0  0  0  0  0  0  0  0  0  0
   -4.6619   -1.2919    0.0420 C   0  0  0  0  0  0  0  0  0  0  0  0
   -5.9567   -1.8626    0.0481 N   0  0  0  0  0  0  0  0  0  0  0  0
   -3.4738   -2.0878    0.0840 C   0  0  0  0  0  0  0  0  0  0  0  0
   -3.5126   -3.5015    0.1344 N   0  0  0  0  0  0  0  0  0  0  0  0
   -2.1988   -1.4665    0.0759 C   0  0  0  0  0  0  0  0  0  0  0  0
   -2.1408   -0.0665    0.0262 C   0  0  0  0  0  0  0  0  0  0  0  0
   -1.1083    0.7468    0.0086 N   0  0  0  0  0  0  0  0  0  0  0  0
    0.1089    3.1456   -0.0740 H   0  0  0  0  0  0  0  0  0  0  0  0
   -1.3635    4.0414   -0.1160 H   0  0  0  0  0  0  0  0  0  0  0  0
   -5.4648    0.7315   -0.0405 H   0  0  0  0  0  0  0  0  0  0  0  0
   -6.7799   -1.2670    0.0172 H   0  0  0  0  0  0  0  0  0  0  0  0
   -6.1073   -2.8651    0.0830 H   0  0  0  0  0  0  0  0  0  0  0  0
   -4.3850   -4.0191    0.1430 H   0  0  0  0  0  0  0  0  0  0  0  0
   -2.6506   -4.0392    0.1635 H   0  0  0  0  0  0  0  0  0  0  0  0
   -1.3033   -2.0772    0.1076 H   0  0  0  0  0  0  0  0  0  0  0  0
   -3.8292    3.1216   -0.1099 C   0  0  0  0  0  0  0  0  0  0  0  0
   -3.6315    3.7432    0.7696 H   0  0  0  0  0  0  0  0  0  0  0  0
   -3.6139    3.6746   -1.0301 H   0  0  0  0  0  0  0  0  0  0  0  0
   -4.8787    2.8176   -0.1084 H   0  0  0  0  0  0  0  0  0  0  0  0
    3.0435   -2.5449   -0.9034 C   0  0  0  0  0  0  0  0  0  0  0  0
    3.1735   -1.7384    0.1688 C   0  0  0  0  0  0  0  0  0  0  0  0
    3.9924   -0.5870    0.1037 C   0  0  2  0  0  0  0  0  0  0  0  0
    5.3155   -0.6309    0.1216 N   0  0  0  0  0  0  0  0  0  0  0  0
    5.7581    0.6410    0.0619 C   0  0  0  0  0  0  0  0  0  0  0  0
    4.6240    1.4667    0.0189 C   0  0  0  0  0  0  0  0  0  0  0  0
    3.5339    0.6595    0.0511 N   0  0  0  0  0  0  0  0  0  0  0  0
    2.4032   -3.4173   -0.8532 H   0  0  0  0  0  0  0  0  0  0  0  0
    3.5643   -2.3547   -1.8360 H   0  0  0  0  0  0  0  0  0  0  0  0
    2.6235   -1.9523    1.0776 H   0  0  0  0  0  0  0  0  0  0  0  0
    6.8281    0.7995    0.0596 H   0  0  0  0  0  0  0  0  0  0  0  0
    4.4711    2.5366   -0.0307 H   0  0  0  0  0  0  0  0  0  0  0  0
    6.2003   -1.7933    0.1891 C   0  0  0  0  0  0  0  0  0  0  0  0
    6.2008   -2.2790   -0.7918 H   0  0  0  0  0  0  0  0  0  0  0  0
    5.8240   -2.4762    0.9576 H   0  0  0  0  0  0  0  0  0  0  0  0
    7.2131   -1.4701    0.4510 H   0  0  0  0  0  0  0  0  0  0  0  0
    0.2930    0.2502    0.0437 C   0  0  2  0  0  0  0  0  0  0  0  0
    0.3164   -0.8406    0.0911 H   0  0  0  0  0  0  0  0  0  0  0  0
    1.2221    0.8468    1.1220 C   0  0  0  0  0  0  0  0  0  0  0  0
    1.6250    0.1006    1.8132 H   0  0  0  0  0  0  0  0  0  0  0  0
    0.7856    1.6819    1.6777 H   0  0  0  0  0  0  0  0  0  0  0  0
    2.2017    1.2969    0.0157 C   0  0  2  0  0  0  0  0  0  0  0  0
    2.3021    2.3875   -0.0295 H   0  0  0  0  0  0  0  0  0  0  0  0
    1.2406    0.7541   -1.0649 C   0  0  0  0  0  0  0  0  0  0  0  0
    1.6538   -0.0478   -1.6836 H   0  0  0  0  0  0  0  0  0  0  0  0
    0.8140    1.5392   -1.6962 H   0  0  0  0  0  0  0  0  0  0  0  0
  1 13  1  0  0  0  0
  2  1  1  6  0  0  0
  2 12  1  0  0  0  0
  3  2  1  0  0  0  0
  3  4  1  0  0  0  0
  4  5  1  0  0  0  0
  4 11  2  0  0  0  0
  5  6  2  0  0  0  0
  6  7  1  0  0  0  0
  6  8  1  0  0  0  0
  7 17  1  0  0  0  0
  8  9  1  0  0  0  0
  9 18  1  0  0  0  0
  9 19  1  0  0  0  0
 10  8  2  0  0  0  0
 10 20  1  0  0  0  0
 11 10  1  0  0  0  0
 12 11  1  0  0  0  0
 12 41  1  0  0  0  0
 14  1  1  0  0  0  0
 15  5  1  0  0  0  0
 16  7  1  0  0  0  0
 21 24  1  0  0  0  0
 21  3  1  0  0  0  0
 21 22  1  0  0  0  0
 23 21  1  0  0  0  0
 25 32  1  0  0  0  0
 25 26  2  0  0  0  0
 26 34  1  0  0  0  0
 27 28  1  0  0  0  0
 27 26  1  1  0  0  0
 28 37  1  0  0  0  0
 29 28  1  0  0  0  0
 30 31  1  0  0  0  0
 30 29  2  0  0  0  0
 31 27  1  0  0  0  0
 33 25  1  0  0  0  0
 35 29  1  0  0  0  0
 36 30  1  0  0  0  0
 37 40  1  0  0  0  0
 37 39  1  0  0  0  0
 38 37  1  0  0  0  0
 41 42  1  1  0  0  0
 41 43  1  0  0  0  0
 43 45  1  0  0  0  0
 43 44  1  0  0  0  0
 46 47  1  6  0  0  0
 46 31  1  0  0  0  0
 46 43  1  0  0  0  0
 48 46  1  0  0  0  0
 48 41  1  0  0  0  0
 49 48  1  0  0  0  0
 50 48  1  0  0  0  0
M  END
>  <energy_and_gap>
-15.484  3.466

$$$$
BEA_40/Syn031072/Syn031072.car
 OpenBabel12061810373D

 52 55  0  0  1  0  0  0  0  0999 V2000
   -2.7168   -3.0681    0.0085 N   0  0  0  0  0  0  0  0  0  0  0  0
   -2.4001   -1.7419    0.2480 C   0  0  2  0  0  0  0  0  0  0  0  0
   -3.0374   -0.7313   -0.3006 N   0  0  0  0  0  0  0  0  0  0  0  0
   -2.4443    0.3449    0.1372 C   0  0  0  0  0  0  0  0  0  0  0  0
   -2.7039    1.6897   -0.1417 C   0  0  0  0  0  0  0  0  0  0  0  0
   -1.8745    2.6643    0.4720 C   0  0  0  0  0  0  0  0  0  0  0  0
   -2.1340    4.0234    0.1767 N   0  0  0  0  0  0  0  0  0  0  0  0
   -0.8199    2.2606    1.3539 C   0  0  0  0  0  0  0  0  0  0  0  0
    0.0369    3.1923    1.9859 N   0  0  0  0  0  0  0  0  0  0  0  0
   -0.5998    0.8855    1.6196 C   0  0  0  0  0  0  0  0  0  0  0  0
   -1.4264   -0.0435    0.9810 C   0  0  0  0  0  0  0  0  0  0  0  0
   -1.4106   -1.3500    1.0238 N   0  0  0  0  0  0  0  0  0  0  0  0
   -2.1985   -3.8266    0.4381 H   0  0  0  0  0  0  0  0  0  0  0  0
   -3.4824   -3.3225   -0.6070 H   0  0  0  0  0  0  0  0  0  0  0  0
   -3.5051    1.9870   -0.8112 H   0  0  0  0  0  0  0  0  0  0  0  0
   -1.5900    4.7792    0.5791 H   0  0  0  0  0  0  0  0  0  0  0  0
   -2.8889    4.2758   -0.4554 H   0  0  0  0  0  0  0  0  0  0  0  0
   -0.0552    4.1929    1.8465 H   0  0  0  0  0  0  0  0  0  0  0  0
    0.7765    2.8735    2.6060 H   0  0  0  0  0  0  0  0  0  0  0  0
    0.1955    0.5733    2.2886 H   0  0  0  0  0  0  0  0  0  0  0  0
   -4.1781   -0.8221   -1.2202 C   0  0  0  0  0  0  0  0  0  0  0  0
   -4.9725   -1.3965   -0.7325 H   0  0  0  0  0  0  0  0  0  0  0  0
   -4.5544    0.1741   -1.4658 H   0  0  0  0  0  0  0  0  0  0  0  0
   -3.8437   -1.3241   -2.1341 H   0  0  0  0  0  0  0  0  0  0  0  0
    0.8963    0.7342   -3.7566 N   0  0  0  0  0  0  0  0  0  0  0  0
    1.5191    0.4738   -2.5133 C   0  0  0  0  0  0  0  0  0  0  0  0
    2.5843    1.3202   -2.1226 C   0  0  0  0  0  0  0  0  0  0  0  0
    3.2803    1.1147   -0.9194 C   0  0  0  0  0  0  0  0  0  0  0  0
    2.8569    0.0567   -0.1173 C   0  0  0  0  0  0  0  0  0  0  0  0
    3.3116   -0.3191    1.0364 N   0  0  0  0  0  0  0  0  0  0  0  0
    2.5800   -1.3285    1.4175 C   0  0  0  0  0  0  0  0  0  0  0  0
    1.6496   -1.6161    0.5340 N   0  0  0  0  0  0  0  0  0  0  0  0
    1.8119   -0.7788   -0.4614 C   0  0  0  0  0  0  0  0  0  0  0  0
    1.1150   -0.6208   -1.6784 C   0  0  0  0  0  0  0  0  0  0  0  0
    0.0754   -1.4935   -2.0695 N   0  0  0  0  0  0  0  0  0  0  0  0
    0.1927    0.1156   -4.1469 H   0  0  0  0  0  0  0  0  0  0  0  0
    1.1716    1.5413   -4.3100 H   0  0  0  0  0  0  0  0  0  0  0  0
    2.8929    2.1441   -2.7592 H   0  0  0  0  0  0  0  0  0  0  0  0
    4.0991    1.7679   -0.6354 H   0  0  0  0  0  0  0  0  0  0  0  0
    2.7213   -1.8475    2.3589 H   0  0  0  0  0  0  0  0  0  0  0  0
    0.1267   -2.4845   -1.8644 H   0  0  0  0  0  0  0  0  0  0  0  0
   -0.6849   -1.1705   -2.6607 H   0  0  0  0  0  0  0  0  0  0  0  0
    4.4090    0.2350    1.8293 C   0  0  0  0  0  0  0  0  0  0  0  0
    4.1540    1.2659    2.0964 H   0  0  0  0  0  0  0  0  0  0  0  0
    5.3208    0.2086    1.2235 H   0  0  0  0  0  0  0  0  0  0  0  0
    4.5498   -0.3618    2.7368 H   0  0  0  0  0  0  0  0  0  0  0  0
    1.2932   -3.4396    1.4935 H   0  0  0  0  0  0  0  0  0  0  0  0
    0.7239   -2.6918    0.9291 C   0  0  0  0  0  0  0  0  0  0  0  0
    0.3801   -3.1963    0.0258 H   0  0  0  0  0  0  0  0  0  0  0  0
   -0.4636   -2.1904    1.7797 C   0  0  0  0  0  0  0  0  0  0  0  0
   -1.0272   -3.0411    2.1752 H   0  0  0  0  0  0  0  0  0  0  0  0
   -0.1167   -1.6246    2.6499 H   0  0  0  0  0  0  0  0  0  0  0  0
  1 13  1  0  0  0  0
  2  1  1  6  0  0  0
  2 12  1  0  0  0  0
  3  4  1  0  0  0  0
  3  2  1  0  0  0  0
  4 11  2  0  0  0  0
  5  4  1  0  0  0  0
  5  6  2  0  0  0  0
  6  8  1  0  0  0  0
  7  6  1  0  0  0  0
  7 16  1  0  0  0  0
  8 10  2  0  0  0  0
  8  9  1  0  0  0  0
  9 19  1  0  0  0  0
 10 20  1  0  0  0  0
 11 12  1  0  0  0  0
 11 10  1  0  0  0  0
 12 50  1  0  0  0  0
 14  1  1  0  0  0  0
 15  5  1  0  0  0  0
 17  7  1  0  0  0  0
 18  9  1  0  0  0  0
 21 22  1  0  0  0  0
 21  3  1  0  0  0  0
 23 21  1  0  0  0  0
 24 21  1  0  0  0  0
 25 26  1  0  0  0  0
 26 27  1  0  0  0  0
 26 34  2  0  0  0  0
 27 28  2  0  0  0  0
 28 39  1  0  0  0  0
 28 29  1  0  0  0  0
 29 30  1  0  0  0  0
 30 31  1  0  0  0  0
 30 43  1  0  0  0  0
 31 40  1  0  0  0  0
 32 48  1  0  0  0  0
 32 31  1  0  0  0  0
 33 29  2  0  0  0  0
 33 32  1  0  0  0  0
 34 33  1  0  0  0  0
 35 41  1  0  0  0  0
 35 34  1  0  0  0  0
 36 25  1  0  0  0  0
 37 25  1  0  0  0  0
 38 27  1  0  0  0  0
 42 35  1  0  0  0  0
 43 44  1  0  0  0  0
 43 46  1  0  0  0  0
 45 43  1  0  0  0  0
 48 47  1  0  0  0  0
 48 50  1  0  0  0  0
 49 48  1  0  0  0  0
 50 51  1  0  0  0  0
 50 52  1  0  0  0  0
M  END
>  <energy_and_gap>
-15.202  3.435

$$$$
BEA_40/Syn096616/Syn096616.car
 OpenBabel12061810373D

 53 55  0  0  1  0  0  0  0  0999 V2000
   -2.6378   -0.4215   -0.4620 C   0  0  0  0  0  0  0  0  0  0  0  0
   -2.7223    0.7019   -1.2988 C   0  0  0  0  0  0  0  0  0  0  0  0
   -3.3358   -1.9333    1.0251 N   0  0  0  0  0  0  0  0  0  0  0  0
   -1.6319   -1.3084   -0.1999 N   0  0  0  0  0  0  0  0  0  0  0  0
   -2.0914   -2.1687    0.6868 C   0  0  0  0  0  0  0  0  0  0  0  0
   -3.7453   -0.8496    0.3284 C   0  0  0  0  0  0  0  0  0  0  0  0
   -3.9957    1.3712   -1.3290 C   0  0  0  0  0  0  0  0  0  0  0  0
   -4.9788   -0.2141    0.3229 C   0  0  0  0  0  0  0  0  0  0  0  0
   -5.0795    0.9032   -0.5303 C   0  0  0  0  0  0  0  0  0  0  0  0
   -1.6242    1.1723   -2.0544 N   0  0  0  0  0  0  0  0  0  0  0  0
   -4.2213    2.5866   -2.1896 C   0  0  0  0  0  0  0  0  0  0  0  0
   -1.5150   -2.9891    1.0976 H   0  0  0  0  0  0  0  0  0  0  0  0
   -5.8163   -0.5488    0.9260 H   0  0  0  0  0  0  0  0  0  0  0  0
   -6.0313    1.4241   -0.5647 H   0  0  0  0  0  0  0  0  0  0  0  0
   -1.7467    1.8719   -2.7802 H   0  0  0  0  0  0  0  0  0  0  0  0
   -0.6771    0.8842   -1.8390 H   0  0  0  0  0  0  0  0  0  0  0  0
   -3.5245    3.3843   -1.9141 H   0  0  0  0  0  0  0  0  0  0  0  0
   -5.2350    2.9823   -2.0726 H   0  0  0  0  0  0  0  0  0  0  0  0
   -4.0867    2.3354   -3.2463 H   0  0  0  0  0  0  0  0  0  0  0  0
   -4.1015   -2.7293    1.9812 C   0  0  0  0  0  0  0  0  0  0  0  0
   -3.4718   -3.5306    2.3818 H   0  0  0  0  0  0  0  0  0  0  0  0
   -4.4287   -2.0711    2.7925 H   0  0  0  0  0  0  0  0  0  0  0  0
   -4.9638   -3.1568    1.4594 H   0  0  0  0  0  0  0  0  0  0  0  0
    4.2713   -0.4157    0.0643 C   0  0  1  0  0  0  0  0  0  0  0  0
    5.0576   -0.2362   -0.9852 N   0  0  0  0  0  0  0  0  0  0  0  0
    4.4766   -0.8628   -2.0302 C   0  0  0  0  0  0  0  0  0  0  0  0
    3.2884   -1.4379   -1.5531 C   0  0  0  0  0  0  0  0  0  0  0  0
    3.1947   -1.1285   -0.2381 N   0  0  0  0  0  0  0  0  0  0  0  0
    4.5553    0.0777    1.3215 N   0  0  0  0  0  0  0  0  0  0  0  0
    4.9846   -0.8235   -2.9842 H   0  0  0  0  0  0  0  0  0  0  0  0
    2.4955   -2.0311   -1.9879 H   0  0  0  0  0  0  0  0  0  0  0  0
    3.9097   -0.0482    2.0935 H   0  0  0  0  0  0  0  0  0  0  0  0
    5.4081    0.5983    1.4979 H   0  0  0  0  0  0  0  0  0  0  0  0
    6.3264    0.4849   -1.0810 C   0  0  0  0  0  0  0  0  0  0  0  0
    7.0450    0.0058   -0.4083 H   0  0  0  0  0  0  0  0  0  0  0  0
    6.6981    0.4487   -2.1102 H   0  0  0  0  0  0  0  0  0  0  0  0
    6.1538    1.5246   -0.7847 H   0  0  0  0  0  0  0  0  0  0  0  0
    1.8532    2.9381    2.5035 N   0  0  0  0  0  0  0  0  0  0  0  0
    2.7184    2.5391    2.8573 H   0  0  0  0  0  0  0  0  0  0  0  0
    1.6660    3.8937    2.7954 H   0  0  0  0  0  0  0  0  0  0  0  0
    1.0059    2.2173    1.6865 C   0  0  0  0  0  0  0  0  0  0  0  0
   -0.1434    2.8840    1.2747 N   0  0  0  0  0  0  0  0  0  0  0  0
   -0.8404    2.4566    0.6728 H   0  0  0  0  0  0  0  0  0  0  0  0
   -0.3535    3.8390    1.5522 H   0  0  0  0  0  0  0  0  0  0  0  0
    1.3496    0.9201    1.3444 N   0  0  0  0  0  0  0  0  0  0  0  0
    0.5288    0.3630    0.6021 N   0  0  0  0  0  0  0  0  0  0  0  0
    0.7702   -0.8525    0.2279 C   0  0  0  0  0  0  0  0  0  0  0  0
    2.0521   -1.5939    0.5606 C   0  0  0  0  0  0  0  0  0  0  0  0
    1.9462   -2.6686    0.3749 H   0  0  0  0  0  0  0  0  0  0  0  0
    2.3051   -1.4980    1.6211 H   0  0  0  0  0  0  0  0  0  0  0  0
   -0.2508   -1.5165   -0.6596 C   0  0  0  0  0  0  0  0  0  0  0  0
   -0.0781   -2.5981   -0.7131 H   0  0  0  0  0  0  0  0  0  0  0  0
   -0.1754   -1.1540   -1.6879 H   0  0  0  0  0  0  0  0  0  0  0  0
  1  4  1  0  0  0  0
  1  6  1  0  0  0  0
  2  1  2  0  0  0  0
  3 20  1  0  0  0  0
  4  5  1  0  0  0  0
  5  3  1  0  0  0  0
  5 12  1  0  0  0  0
  6  3  1  0  0  0  0
  7  2  1  0  0  0  0
  7  9  2  0  0  0  0
  8  6  2  0  0  0  0
  8 13  1  0  0  0  0
  9  8  1  0  0  0  0
 10 16  1  0  0  0  0
 10  2  1  0  0  0  0
 11 18  1  0  0  0  0
 11 17  1  0  0  0  0
 11  7  1  0  0  0  0
 14  9  1  0  0  0  0
 15 10  1  0  0  0  0
 19 11  1  0  0  0  0
 20 21  1  0  0  0  0
 20 22  1  0  0  0  0
 23 20  1  0  0  0  0
 24 29  1  1  0  0  0
 25 24  1  0  0  0  0
 26 27  2  0  0  0  0
 26 25  1  0  0  0  0
 27 28  1  0  0  0  0
 28 24  1  0  0  0  0
 28 48  1  0  0  0  0
 29 33  1  0  0  0  0
 29 32  1  0  0  0  0
 30 26  1  0  0  0  0
 31 27  1  0  0  0  0
 34 25  1  0  0  0  0
 34 37  1  0  0  0  0
 34 35  1  0  0  0  0
 36 34  1  0  0  0  0
 38 40  1  0  0  0  0
 38 39  1  0  0  0  0
 41 38  1  0  0  0  0
 42 44  1  0  0  0  0
 42 41  2  0  0  0  0
 43 42  1  0  0  0  0
 45 41  1  0  0  0  0
 46 45  1  0  0  0  0
 47 48  1  0  0  0  0
 47 46  2  0  0  0  0
 48 50  1  0  0  0  0
 49 48  1  0  0  0  0
 51  4  1  0  0  0  0
 51 47  1  0  0  0  0
 52 51  1  0  0  0  0
 53 51  1  0  0  0  0
M  RAD  1  45   2
M  END
>  <energy_and_gap>
-15.138  3.423

$$$$
BEA_40/Syn090200/Syn090200.car
 OpenBabel12061810373D

 56 58  0  0  1  0  0  0  0  0999 V2000
   -1.6601    3.6107   -0.0797 N   0  0  0  0  0  0  0  0  0  0  0  0
   -1.8941    2.2507   -0.1657 C   0  0  1  0  0  0  0  0  0  0  0  0
   -0.9869    1.3809   -0.5808 N   0  0  0  0  0  0  0  0  0  0  0  0
   -1.5692    0.1628   -0.5467 C   0  0  0  0  0  0  0  0  0  0  0  0
   -2.8955    0.3283   -0.0998 C   0  0  0  0  0  0  0  0  0  0  0  0
   -3.0428    1.6627    0.1545 N   0  0  0  0  0  0  0  0  0  0  0  0
   -3.9657   -0.6429    0.1041 C   0  0  0  0  0  0  0  0  0  0  0  0
   -3.7430   -1.7798    0.9203 C   0  0  0  0  0  0  0  0  0  0  0  0
   -4.7591   -2.7354    1.1099 C   0  0  0  0  0  0  0  0  0  0  0  0
   -6.0078   -2.5781    0.4831 C   0  0  0  0  0  0  0  0  0  0  0  0
   -6.2404   -1.4568   -0.3442 C   0  0  0  0  0  0  0  0  0  0  0  0
   -7.4889   -1.2995   -0.9800 N   0  0  0  0  0  0  0  0  0  0  0  0
   -5.2226   -0.4937   -0.5380 C   0  0  0  0  0  0  0  0  0  0  0  0
   -0.7483    4.0021   -0.2894 H   0  0  0  0  0  0  0  0  0  0  0  0
   -2.3949    4.2595    0.1818 H   0  0  0  0  0  0  0  0  0  0  0  0
   -0.9713   -0.6826   -0.8589 H   0  0  0  0  0  0  0  0  0  0  0  0
   -2.7889   -1.9280    1.4174 H   0  0  0  0  0  0  0  0  0  0  0  0
   -4.5783   -3.5981    1.7421 H   0  0  0  0  0  0  0  0  0  0  0  0
   -6.7792   -3.3257    0.6413 H   0  0  0  0  0  0  0  0  0  0  0  0
   -8.2269   -1.9861   -0.8485 H   0  0  0  0  0  0  0  0  0  0  0  0
   -7.6697   -0.4974   -1.5776 H   0  0  0  0  0  0  0  0  0  0  0  0
   -5.4045    0.3609   -1.1842 H   0  0  0  0  0  0  0  0  0  0  0  0
   -4.2111    2.3669    0.6995 C   0  0  0  0  0  0  0  0  0  0  0  0
   -3.8769    3.1111    1.4291 H   0  0  0  0  0  0  0  0  0  0  0  0
   -4.8671    1.6598    1.2138 H   0  0  0  0  0  0  0  0  0  0  0  0
   -4.7401    2.8465   -0.1302 H   0  0  0  0  0  0  0  0  0  0  0  0
    5.4743   -1.2104    0.1108 C   0  0  1  0  0  0  0  0  0  0  0  0
    6.6240   -0.6306   -0.1948 N   0  0  0  0  0  0  0  0  0  0  0  0
    6.4744    0.6924    0.0293 C   0  0  0  0  0  0  0  0  0  0  0  0
    5.1626    0.8834    0.4912 C   0  0  0  0  0  0  0  0  0  0  0  0
    4.5701   -0.3336    0.5252 N   0  0  0  0  0  0  0  0  0  0  0  0
    5.2503   -2.5678    0.0009 N   0  0  0  0  0  0  0  0  0  0  0  0
    7.3227    1.3336   -0.1679 H   0  0  0  0  0  0  0  0  0  0  0  0
    4.5759    1.7374    0.7999 H   0  0  0  0  0  0  0  0  0  0  0  0
    5.9836   -3.1928   -0.3177 H   0  0  0  0  0  0  0  0  0  0  0  0
    4.3497   -2.9749    0.2287 H   0  0  0  0  0  0  0  0  0  0  0  0
    7.8634   -1.2311   -0.6872 C   0  0  0  0  0  0  0  0  0  0  0  0
    8.6201   -0.4538   -0.8350 H   0  0  0  0  0  0  0  0  0  0  0  0
    8.2133   -1.9545    0.0562 H   0  0  0  0  0  0  0  0  0  0  0  0
    7.6495   -1.7280   -1.6389 H   0  0  0  0  0  0  0  0  0  0  0  0
    1.4794    2.0611    1.1725 C   0  0  0  0  0  0  0  0  0  0  0  0
    2.3464    1.9165    1.8166 H   0  0  0  0  0  0  0  0  0  0  0  0
    0.5861    1.9841    1.7988 H   0  0  0  0  0  0  0  0  0  0  0  0
    1.5491    3.0886    0.8030 H   0  0  0  0  0  0  0  0  0  0  0  0
    1.4008    1.0916    0.0195 C   0  0  0  0  0  0  0  0  0  0  0  0
    0.4032    1.5217   -1.0372 C   0  0  0  0  0  0  0  0  0  0  0  0
    0.5692    2.5690   -1.3072 H   0  0  0  0  0  0  0  0  0  0  0  0
    0.4914    0.9755   -1.9791 H   0  0  0  0  0  0  0  0  0  0  0  0
    2.1836   -0.0472   -0.0809 C   0  0  0  0  0  0  0  0  0  0  0  0
    2.1061   -1.0168   -1.2338 C   0  0  0  0  0  0  0  0  0  0  0  0
    2.0306   -2.0438   -0.8641 H   0  0  0  0  0  0  0  0  0  0  0  0
    3.0026   -0.9438   -1.8560 H   0  0  0  0  0  0  0  0  0  0  0  0
    1.2433   -0.8689   -1.8825 H   0  0  0  0  0  0  0  0  0  0  0  0
    3.1795   -0.4778    0.9771 C   0  0  0  0  0  0  0  0  0  0  0  0
    3.0154   -1.5263    1.2441 H   0  0  0  0  0  0  0  0  0  0  0  0
    3.0882    0.0667    1.9197 H   0  0  0  0  0  0  0  0  0  0  0  0
  1 15  1  0  0  0  0
  2  1  1  1  0  0  0
  2  6  1  0  0  0  0
  3  4  1  0  0  0  0
  3  2  1  0  0  0  0
  4  5  2  0  0  0  0
  5  7  1  0  0  0  0
  5  6  1  0  0  0  0
  6 23  1  0  0  0  0
  7  8  2  0  0  0  0
  8  9  1  0  0  0  0
  8 17  1  0  0  0  0
  9 18  1  0  0  0  0
 10 19  1  0  0  0  0
 10  9  2  0  0  0  0
 11 10  1  0  0  0  0
 12 20  1  0  0  0  0
 12 11  1  0  0  0  0
 13 11  2  0  0  0  0
 13  7  1  0  0  0  0
 14  1  1  0  0  0  0
 16  4  1  0  0  0  0
 21 12  1  0  0  0  0
 22 13  1  0  0  0  0
 23 25  1  0  0  0  0
 23 24  1  0  0  0  0
 26 23  1  0  0  0  0
 27 32  1  6  0  0  0
 27 31  1  0  0  0  0
 28 29  1  0  0  0  0
 28 27  1  0  0  0  0
 29 30  2  0  0  0  0
 30 31  1  0  0  0  0
 30 34  1  0  0  0  0
 31 54  1  0  0  0  0
 32 36  1  0  0  0  0
 33 29  1  0  0  0  0
 35 32  1  0  0  0  0
 37 28  1  0  0  0  0
 37 39  1  0  0  0  0
 38 37  1  0  0  0  0
 40 37  1  0  0  0  0
 41 43  1  0  0  0  0
 41 42  1  0  0  0  0
 44 41  1  0  0  0  0
 45 41  1  0  0  0  0
 46  3  1  0  0  0  0
 46 45  1  0  0  0  0
 47 46  1  0  0  0  0
 48 46  1  0  0  0  0
 49 45  2  0  0  0  0
 49 54  1  0  0  0  0
 50 51  1  0  0  0  0
 50 49  1  0  0  0  0
 52 50  1  0  0  0  0
 53 50  1  0  0  0  0
 54 55  1  0  0  0  0
 54 56  1  0  0  0  0
M  END
>  <energy_and_gap>
-15.028  3.369

$$$$
BEA_40/Syn043659/Syn043659.car
 OpenBabel12061810373D

 51 53  0  0  1  0  0  0  0  0999 V2000
   -7.4858   -1.9067   -1.1436 N   0  0  0  0  0  0  0  0  0  0  0  0
   -6.7104   -0.9781   -0.4860 C   0  0  0  0  0  0  0  0  0  0  0  0
   -5.6460   -1.2619    0.3901 C   0  0  0  0  0  0  0  0  0  0  0  0
   -5.1689   -0.0650    0.8004 N   0  0  0  0  0  0  0  0  0  0  0  0
   -4.0619    0.1679    1.7299 C   0  0  0  0  0  0  0  0  0  0  0  0
   -2.7293    0.2270    1.0288 C   0  0  2  0  0  0  0  0  0  0  0  0
   -2.2302    1.4492    0.5185 C   0  0  0  0  0  0  0  0  0  0  0  0
   -0.9842    1.4478   -0.1350 C   0  0  0  0  0  0  0  0  0  0  0  0
   -0.2224    0.3348   -0.3146 N   0  0  0  0  0  0  0  0  0  0  0  0
   -0.7190   -0.8330    0.1771 C   0  0  0  0  0  0  0  0  0  0  0  0
   -1.9522   -0.9416    0.8457 C   0  0  0  0  0  0  0  0  0  0  0  0
   -5.9027    0.8658    0.2162 C   0  0  0  0  0  0  0  0  0  0  0  0
   -6.8378    0.3633   -0.5667 N   0  0  0  0  0  0  0  0  0  0  0  0
   -8.2376   -1.6121   -1.7591 H   0  0  0  0  0  0  0  0  0  0  0  0
   -7.3279   -2.9040   -1.0285 H   0  0  0  0  0  0  0  0  0  0  0  0
   -5.1620   -2.1485    0.7779 H   0  0  0  0  0  0  0  0  0  0  0  0
   -4.0758   -0.6354    2.4760 H   0  0  0  0  0  0  0  0  0  0  0  0
   -4.2609    1.1022    2.2684 H   0  0  0  0  0  0  0  0  0  0  0  0
   -2.7857    2.3751    0.6281 H   0  0  0  0  0  0  0  0  0  0  0  0
   -0.5847    2.3787   -0.5261 H   0  0  0  0  0  0  0  0  0  0  0  0
   -0.1081   -1.7194    0.0344 H   0  0  0  0  0  0  0  0  0  0  0  0
   -2.2883   -1.9058    1.2136 H   0  0  0  0  0  0  0  0  0  0  0  0
   -5.7501    1.9273    0.3657 H   0  0  0  0  0  0  0  0  0  0  0  0
   -7.7916    1.1535   -1.3398 C   0  0  0  0  0  0  0  0  0  0  0  0
   -7.6082    2.2198   -1.1710 H   0  0  0  0  0  0  0  0  0  0  0  0
   -8.8015    0.8899   -1.0100 H   0  0  0  0  0  0  0  0  0  0  0  0
   -7.6565    0.9129   -2.3991 H   0  0  0  0  0  0  0  0  0  0  0  0
    7.5187   -0.8481   -0.3576 N   0  0  0  0  0  0  0  0  0  0  0  0
    7.4470    0.4639   -0.6668 C   0  0  0  0  0  0  0  0  0  0  0  0
    6.2121    0.9150   -0.1631 C   0  0  0  0  0  0  0  0  0  0  0  0
    5.5913   -0.1335    0.4244 N   0  0  0  0  0  0  0  0  0  0  0  0
    6.4093   -1.1612    0.2841 C   0  0  0  0  0  0  0  0  0  0  0  0
    5.7253    2.2002   -0.2579 N   0  0  0  0  0  0  0  0  0  0  0  0
    8.2839    0.8936   -1.2017 H   0  0  0  0  0  0  0  0  0  0  0  0
    6.1955   -2.1561    0.6539 H   0  0  0  0  0  0  0  0  0  0  0  0
    4.8201    2.4439    0.1310 H   0  0  0  0  0  0  0  0  0  0  0  0
    6.2584    2.9335   -0.7171 H   0  0  0  0  0  0  0  0  0  0  0  0
    8.6295   -1.7353   -0.6838 C   0  0  0  0  0  0  0  0  0  0  0  0
    8.4112   -2.7412   -0.3106 H   0  0  0  0  0  0  0  0  0  0  0  0
    9.5336   -1.3447   -0.2056 H   0  0  0  0  0  0  0  0  0  0  0  0
    8.7459   -1.7551   -1.7722 H   0  0  0  0  0  0  0  0  0  0  0  0
    4.2977   -0.2199    1.1051 C   0  0  0  0  0  0  0  0  0  0  0  0
    4.1871    0.6849    1.7129 H   0  0  0  0  0  0  0  0  0  0  0  0
    4.3237   -1.0739    1.7908 H   0  0  0  0  0  0  0  0  0  0  0  0
    3.1772   -0.3795    0.1270 C   0  0  0  0  0  0  0  0  0  0  0  0
    3.1617   -1.2851   -0.4702 H   0  0  0  0  0  0  0  0  0  0  0  0
    2.1960    0.5368   -0.0250 C   0  0  0  0  0  0  0  0  0  0  0  0
    2.2120    1.4420    0.5728 H   0  0  0  0  0  0  0  0  0  0  0  0
    1.0725    0.3803   -1.0002 C   0  0  0  0  0  0  0  0  0  0  0  0
    1.1706   -0.5349   -1.5954 H   0  0  0  0  0  0  0  0  0  0  0  0
    1.0623    1.2225   -1.7005 H   0  0  0  0  0  0  0  0  0  0  0  0
  1 15  1  0  0  0  0
  1  2  1  0  0  0  0
  2  3  2  0  0  0  0
  3 16  1  0  0  0  0
  3  4  1  0  0  0  0
  4  5  1  0  0  0  0
  5 18  1  0  0  0  0
  5 17  1  0  0  0  0
  6  5  1  6  0  0  0
  7 19  1  0  0  0  0
  7  6  1  0  0  0  0
  8  7  2  0  0  0  0
  9  8  1  0  0  0  0
  9 10  1  0  0  0  0
 10 11  2  0  0  0  0
 11  6  1  0  0  0  0
 11 22  1  0  0  0  0
 12 23  1  0  0  0  0
 12  4  1  0  0  0  0
 13  2  1  0  0  0  0
 13 12  1  0  0  0  0
 14  1  1  0  0  0  0
 20  8  1  0  0  0  0
 21 10  1  0  0  0  0
 24 25  1  0  0  0  0
 24 26  1  0  0  0  0
 24 13  1  0  0  0  0
 27 24  1  0  0  0  0
 28 32  1  0  0  0  0
 29 28  1  0  0  0  0
 29 30  2  0  0  0  0
 30 31  1  0  0  0  0
 31 42  1  0  0  0  0
 32 31  1  0  0  0  0
 32 35  1  0  0  0  0
 33 30  1  0  0  0  0
 33 36  1  0  0  0  0
 34 29  1  0  0  0  0
 37 33  1  0  0  0  0
 38 28  1  0  0  0  0
 38 39  1  0  0  0  0
 38 40  1  0  0  0  0
 41 38  1  0  0  0  0
 42 43  1  0  0  0  0
 42 44  1  0  0  0  0
 45 42  1  0  0  0  0
 46 45  1  0  0  0  0
 47 45  2  0  0  0  0
 47 48  1  0  0  0  0
 49  9  1  0  0  0  0
 49 47  1  0  0  0  0
 50 49  1  0  0  0  0
 51 49  1  0  0  0  0
M  END
>  <energy_and_gap>
-15.026  3.353

$$$$
BEA_40/Syn074078/Syn074078.car
 OpenBabel12061810373D

 50 52  0  0  1  0  0  0  0  0999 V2000
   -1.3163    2.4223   -0.3026 C   0  0  1  0  0  0  0  0  0  0  0  0
   -1.6530    1.4655    0.5601 N   0  0  0  0  0  0  0  0  0  0  0  0
   -0.5207    1.1419    1.2410 C   0  0  0  0  0  0  0  0  0  0  0  0
    0.5262    1.9308    0.7075 C   0  0  0  0  0  0  0  0  0  0  0  0
   -0.0231    2.7230   -0.2489 N   0  0  0  0  0  0  0  0  0  0  0  0
   -2.2055    3.0195   -1.1788 N   0  0  0  0  0  0  0  0  0  0  0  0
   -0.3851    0.1066    2.3237 C   0  0  0  0  0  0  0  0  0  0  0  0
    1.9686    1.8726    1.0864 C   0  0  0  0  0  0  0  0  0  0  0  0
    2.6888    0.6802    0.5048 C   0  0  0  0  0  0  0  0  0  0  0  0
    3.1529   -0.3631    1.3460 C   0  0  0  0  0  0  0  0  0  0  0  0
    3.8150   -1.4808    0.8041 C   0  0  0  0  0  0  0  0  0  0  0  0
    4.0266   -1.5721   -0.5831 C   0  0  0  0  0  0  0  0  0  0  0  0
    3.5776   -0.5436   -1.4302 C   0  0  0  0  0  0  0  0  0  0  0  0
    2.9157    0.5762   -0.8926 C   0  0  0  0  0  0  0  0  0  0  0  0
   -3.1827    2.7501   -1.2103 H   0  0  0  0  0  0  0  0  0  0  0  0
   -1.9073    3.7514   -1.8150 H   0  0  0  0  0  0  0  0  0  0  0  0
    0.1953   -0.7453    1.9594 H   0  0  0  0  0  0  0  0  0  0  0  0
    0.1261    0.5360    3.1903 H   0  0  0  0  0  0  0  0  0  0  0  0
   -1.3509   -0.2651    2.6690 H   0  0  0  0  0  0  0  0  0  0  0  0
    2.4915    2.7831    0.7824 H   0  0  0  0  0  0  0  0  0  0  0  0
    2.0421    1.8648    2.1793 H   0  0  0  0  0  0  0  0  0  0  0  0
    3.0011   -0.3131    2.4196 H   0  0  0  0  0  0  0  0  0  0  0  0
    4.1644   -2.2730    1.4576 H   0  0  0  0  0  0  0  0  0  0  0  0
    4.5380   -2.4337   -0.9989 H   0  0  0  0  0  0  0  0  0  0  0  0
    3.7442   -0.6125   -2.4999 H   0  0  0  0  0  0  0  0  0  0  0  0
    2.5817    1.3593   -1.5653 H   0  0  0  0  0  0  0  0  0  0  0  0
    0.6355    3.7179   -1.1020 C   0  0  0  0  0  0  0  0  0  0  0  0
    0.2012    4.6995   -0.8860 H   0  0  0  0  0  0  0  0  0  0  0  0
    1.7088    3.7430   -0.9044 H   0  0  0  0  0  0  0  0  0  0  0  0
    0.4710    3.4417   -2.1486 H   0  0  0  0  0  0  0  0  0  0  0  0
   -1.3313   -1.7798   -0.7954 C   0  0  1  0  0  0  0  0  0  0  0  0
   -0.8955   -2.9527   -0.3659 N   0  0  0  0  0  0  0  0  0  0  0  0
   -1.7776   -3.3913    0.5577 C   0  0  0  0  0  0  0  0  0  0  0  0
   -2.7758   -2.4099    0.6689 C   0  0  0  0  0  0  0  0  0  0  0  0
   -2.4529   -1.4146   -0.1903 N   0  0  0  0  0  0  0  0  0  0  0  0
   -0.6808   -1.0225   -1.7480 N   0  0  0  0  0  0  0  0  0  0  0  0
   -1.5833   -4.3488    1.0216 H   0  0  0  0  0  0  0  0  0  0  0  0
   -3.6763   -2.2929    1.2569 H   0  0  0  0  0  0  0  0  0  0  0  0
   -1.0732   -0.1517   -2.0884 H   0  0  0  0  0  0  0  0  0  0  0  0
    0.1956   -1.3360   -2.1527 H   0  0  0  0  0  0  0  0  0  0  0  0
    0.2998   -3.6965   -0.7610 C   0  0  0  0  0  0  0  0  0  0  0  0
    0.2507   -3.8797   -1.8392 H   0  0  0  0  0  0  0  0  0  0  0  0
    1.1768   -3.0914   -0.5116 H   0  0  0  0  0  0  0  0  0  0  0  0
    0.3392   -4.6494   -0.2234 H   0  0  0  0  0  0  0  0  0  0  0  0
   -3.7214    1.6735    0.6688 H   0  0  0  0  0  0  0  0  0  0  0  0
   -2.9867    0.8646    0.7313 C   0  0  0  0  0  0  0  0  0  0  0  0
   -3.0634    0.4656    1.7457 H   0  0  0  0  0  0  0  0  0  0  0  0
   -3.3000   -0.2210   -0.3175 C   0  0  0  0  0  0  0  0  0  0  0  0
   -3.1820    0.1627   -1.3355 H   0  0  0  0  0  0  0  0  0  0  0  0
   -4.3418   -0.5457   -0.2198 H   0  0  0  0  0  0  0  0  0  0  0  0
  1  6  1  6  0  0  0
  1  5  1  0  0  0  0
  1  2  1  0  0  0  0
  2 46  1  0  0  0  0
  2  3  1  0  0  0  0
  3  7  1  0  0  0  0
  4  8  1  0  0  0  0
  4  3  2  0  0  0  0
  5  4  1  0  0  0  0
  7 19  1  0  0  0  0
  7 18  1  0  0  0  0
  8 21  1  0  0  0  0
  9  8  1  0  0  0  0
  9 10  2  0  0  0  0
 10 22  1  0  0  0  0
 11 10  1  0  0  0  0
 11 23  1  0  0  0  0
 12 11  2  0  0  0  0
 13 14  2  0  0  0  0
 13 12  1  0  0  0  0
 14  9  1  0  0  0  0
 15  6  1  0  0  0  0
 16  6  1  0  0  0  0
 17  7  1  0  0  0  0
 20  8  1  0  0  0  0
 24 12  1  0  0  0  0
 25 13  1  0  0  0  0
 26 14  1  0  0  0  0
 27 29  1  0  0  0  0
 27 28  1  0  0  0  0
 27  5  1  0  0  0  0
 30 27  1  0  0  0  0
 31 36  1  1  0  0  0
 31 32  1  0  0  0  0
 31 35  1  0  0  0  0
[truncated: 589,540 more chars]
